# Supplementary material for: Multi-omic characterisation as a tool to improve knowledge, valorisation and conservation of wild fruit genetic resources: the case of Arbutus unedo L
Source: Front Plant Sci. 2023 Sep 8;14:1195673. doi: 10.3389/fpls.2023.1195673 (PMC10514896; doi:10.3389/fpls.2023.1195673)
Supplement: Supplementary file 1 [file Table_1.xlsx]

## Sheet: Foglio1
Supplementary File2: statistically significant proteins dataset
Overexpression during ripening (V<I<R)
Fasta headers	Protein name	Uniprot id	Green	Veraisoned	Red	Ratio Veraisoned/Green	Ratio Red/Green	Ratio Red/Veraisoned	Peptides	Razor + unique peptides	Unique peptides	Sequence coverage [%]	Unique + razor sequence coverage [%]	Unique sequence coverage [%]	Mol. weight [kDa]	Score
tr|A0A6A4L930|A0A6A4L930_9ERIC Uncharacterized protein (Fragment) OS=Rhododendron williamsianum OX=262921 GN=C3L33_15158 PE=3 SV=1;tr|X5I326|X5I326_9ERIC Chalcone synthase OS=Vaccinium ashei OX=945837 GN=CHS2 PE=2 SV=1;tr|Q8L6D2|Q8L6D2_RHOSS Chalcone synth	Chalcone synthase	A0A6A4L930	5.44061e+06	8.71552e+06	2.44065e+08	1.60194	44.8598	28.0035	12	12	12	28.3	28.3	28.3	44.751	323.31
tr|A0A834HAL3|A0A834HAL3_RHOSS Pyr_redox_2 domain-containing protein OS=Rhododendron simsii OX=118357 GN=RHSIM_Rhsim03G0078300 PE=4 SV=1;tr|A0A6A4MCJ4|A0A6A4MCJ4_9ERIC Pyr_redox_2 domain-containing protein (Fragment) OS=Rhododendron williamsianum OX=262921	Pyr_redox_2 domain-containing protein	A0A834HAL3	4.90329e+06	5.20707e+06	2.0026e+08	1.06195	40.8419	38.4592	7	7	7	17.6	17.6	17.6	50.451	141.97
tr|A0A6A4KFW9|A0A6A4KFW9_9ERIC Uncharacterized protein (Fragment) OS=Rhododendron williamsianum OX=262921 GN=C3L33_23510 PE=4 SV=1;tr|A0A6A4M8I4|A0A6A4M8I4_9ERIC Uncharacterized protein (Fragment) OS=Rhododendron williamsianum OX=262921 GN=C3L33_00507 PE=3	Uncharacterized protein	A0A6A4KFW9	5.0629e+06	4.13966e+06	1.5592e+08	0.817645	30.7966	37.665	3	3	3	25.8	25.8	25.8	14.693	20.451
tr|A0A6A4LFW3|A0A6A4LFW3_9ERIC Serine/threonine-protein phosphatase 2A 55 kDa regulatory subunit B (Fragment) OS=Rhododendron williamsianum OX=262921 GN=C3L33_14683 PE=3 SV=1;tr|A0A834L6G3|A0A834L6G3_RHOSS Serine/threonine-protein phosphatase 2A 55 kDa reg	Serine/threonine-protein phosphatase 2A 55 kDa regulatory subunit B	A0A6A4LFW3	601420	3.57293e+06	9.34278e+06	5.94083	15.5345	2.61488	1	1	1	4.1	4.1	4.1	38.628	8.6136
tr|A0A6A4MJ14|A0A6A4MJ14_9ERIC Uncharacterized protein (Fragment) OS=Rhododendron williamsianum OX=262921 GN=C3L33_02156 PE=3 SV=1	Ricin B-type lectin domain-containing protein	A0A6A4MJ14	5.3811e+06	3.18908e+07	8.29005e+07	5.92645	15.4059	2.59951	5	5	5	3.7	3.7	3.7	142.66	81.34
tr|A0A834HND6|A0A834HND6_RHOSS Protein kinase domain-containing protein OS=Rhododendron simsii OX=118357 GN=RHSIM_Rhsim02G0075300 PE=4 SV=1	Protein kinase domain-containing protein	A0A834HND6	3.05512e+06	1.34827e+07	4.16175e+07	4.41315	13.6222	3.08674	5	5	4	12.2	12.2	9.8	37.273	72.173
tr|A0A834GJX6|A0A834GJX6_RHOSS Uncharacterized protein OS=Rhododendron simsii OX=118357 GN=RHSIM_Rhsim08G0192300 PE=3 SV=1;tr|A0A834FV17|A0A834FV17_RHOSS Uncharacterized protein OS=Rhododendron simsii OX=118357 GN=RHSIM_RhsimUnG0162400 PE=3 SV=1;tr|A0A834G	11-beta-hydroxysteroid dehydrogenase 1B-like	A0A834GJX6	7.4086e+06	5.94905e+06	7.46955e+07	0.802992	10.0823	12.5559	1	1	1	6.5	6.5	6.5	35.825	94.733
tr|A0A834GK42|A0A834GK42_RHOSS V-type proton ATPase subunit C OS=Rhododendron simsii OX=118357 GN=RHSIM_Rhsim08G0195300 PE=3 SV=1;tr|A0A6A4MQW6|A0A6A4MQW6_9ERIC V-type proton ATPase subunit C (Fragment) OS=Rhododendron williamsianum OX=262921 GN=C3L33_0049	V-type proton ATPase subunit C	A0A834GK42	6.31316e+06	7.60758e+06	6.2829e+07	1.20503	9.95206	8.25874	4	4	4	9.7	9.7	9.7	52.043	31.05
tr|A0A834HF26|A0A834HF26_RHOSS Epimerase domain-containing protein OS=Rhododendron simsii OX=118357 GN=RHSIM_Rhsim01G0209500 PE=4 SV=1;tr|A0A6A4M543|A0A6A4M543_9ERIC Epimerase domain-containing protein (Fragment) OS=Rhododendron williamsianum OX=262921 GN=	Epimerase domain-containing protein	A0A834HF26	5.35528e+06	2.35751e+07	5.31585e+07	4.40222	9.92638	2.25486	6	6	1	15.3	15.3	2.3	43.695	54.747
tr|A0A6A4KSJ7|A0A6A4KSJ7_9ERIC Fe2OG dioxygenase domain-containing protein (Fragment) OS=Rhododendron williamsianum OX=262921 GN=C3L33_22031 PE=3 SV=1;tr|A0A834GI64|A0A834GI64_RHOSS Fe2OG dioxygenase domain-containing protein OS=Rhododendron simsii OX=1183	Fe2OG dioxygenase domain-containing protein	A0A6A4KSJ7	4.60803e+06	7.76517e+06	4.4101e+07	1.68514	9.57046	5.67934	5	5	1	19.4	19.4	3.4	42.587	109.73
tr|A0A6A4KV25|A0A6A4KV25_9ERIC ADH_N domain-containing protein (Fragment) OS=Rhododendron williamsianum OX=262921 GN=C3L33_20951 PE=4 SV=1	ADH_N domain-containing protein	A0A6A4KV25	7.26158e+06	4.19763e+07	6.8993e+07	5.78061	9.5011	1.64362	1	1	1	19.6	19.6	19.6	11.494	10.693
tr|A0A6A4KUR6|A0A6A4KUR6_9ERIC Uncharacterized protein (Fragment) OS=Rhododendron williamsianum OX=262921 GN=C3L33_21563 PE=3 SV=1	Alcohol dehydrogenase 1	A0A6A4KUR6	6.48613e+06	2.43386e+07	5.41215e+07	3.75241	8.34419	2.22369	2	2	2	3.3	3.3	3.3	48.054	16.754
tr|A0A834LY24|A0A834LY24_RHOSS Uncharacterized protein OS=Rhododendron simsii OX=118357 GN=RHSIM_Rhsim01G0263800 PE=3 SV=1;tr|A0A6A4M939|A0A6A4M939_9ERIC Uncharacterized protein (Fragment) OS=Rhododendron williamsianum OX=262921 GN=C3L33_04244 PE=3 SV=1	11S globulin	A0A834LY24	7.20785e+06	4.42566e+06	5.042e+07	0.614006	6.99515	11.3926	2	2	2	6.4	6.4	6.4	51.585	12.259
tr|A0A834LK28|A0A834LK28_RHOSS Fe2OG dioxygenase domain-containing protein OS=Rhododendron simsii OX=118357 GN=RHSIM_Rhsim07G0247500 PE=3 SV=1;tr|A0A834FZ38|A0A834FZ38_RHOSS Fe2OG dioxygenase domain-containing protein OS=Rhododendron simsii OX=118357 GN=RH	Fe2OG dioxygenase domain-containing protein	A0A834LK28	6.12626e+06	4.88584e+06	4.01775e+07	0.797524	6.55825	8.22326	5	4	2	15.7	9.6	5.2	40.553	72.396
tr|A0A6A4MDB3|A0A6A4MDB3_9ERIC Uncharacterized protein (Fragment) OS=Rhododendron williamsianum OX=262921 GN=C3L33_02048 PE=3 SV=1;tr|A0A834LSC8|A0A834LSC8_RHOSS Uncharacterized protein OS=Rhododendron simsii OX=118357 GN=RHSIM_Rhsim03G0018900 PE=3 SV=1	Polygalacturonase	A0A6A4MDB3	8.43859e+06	4.64596e+06	5.2967e+07	0.550561	6.27676	11.4007	1	1	1	12.3	12.3	12.3	31.91	54.382
tr|A0A834GK15|A0A834GK15_RHOSS Epimerase domain-containing protein OS=Rhododendron simsii OX=118357 GN=RHSIM_Rhsim08G0207100 PE=4 SV=1;tr|A0A834GN50|A0A834GN50_RHOSS Epimerase domain-containing protein OS=Rhododendron simsii OX=118357 GN=RHSIM_Rhsim08G0206	Epimerase domain-containing protein	A0A834GK15	5.32004e+06	4.78519e+06	3.229e+07	0.899465	6.0695	6.74791	3	3	3	14.7	14.7	14.7	29.713	153.64
tr|A0A834L399|A0A834L399_RHOSS Endoglucanase OS=Rhododendron simsii OX=118357 GN=RHSIM_Rhsim13G0008700 PE=3 SV=1;tr|A0A6A4LVK2|A0A6A4LVK2_9ERIC Pectinesterase (Fragment) OS=Rhododendron williamsianum OX=262921 GN=C3L33_07636 PE=3 SV=1	Endoglucanase	A0A834L399	1.05413e+08	1.81465e+08	6.35415e+08	1.72147	6.02789	3.50159	4	4	4	4.1	4.1	4.1	221.41	209.17
tr|A0A834HIK2|A0A834HIK2_RHOSS UDP-glucuronate decarboxylase OS=Rhododendron simsii OX=118357 GN=RHSIM_Rhsim03G0132500 PE=3 SV=1;tr|A0A6A4MBV5|A0A6A4MBV5_9ERIC UDP-glucuronate decarboxylase (Fragment) OS=Rhododendron williamsianum OX=262921 GN=C3L33_02719	UDP-glucuronate decarboxylase	A0A834HIK2	5.88366e+06	9.24804e+06	3.53665e+07	1.57182	6.01097	3.82421	2	2	2	6.6	6.6	6.6	42.719	12.455
tr|A0A6A4KZB6|A0A6A4KZB6_9ERIC UDP-arabinopyranose mutase (Fragment) OS=Rhododendron williamsianum OX=262921 GN=C3L33_18723 PE=3 SV=1;tr|A0A834GCT9|A0A834GCT9_RHOSS UDP-arabinopyranose mutase OS=Rhododendron simsii OX=118357 GN=RHSIM_Rhsim10G0056100 PE=3 S	UDP-arabinopyranose mutase	A0A6A4KZB6	6.6833e+06	2.16352e+07	3.7833e+07	3.23721	5.66082	1.74868	10	6	6	28.8	20.3	20.3	41.64	293.01
tr|A0A834G1M8|A0A834G1M8_RHOSS Uncharacterized protein OS=Rhododendron simsii OX=118357 GN=RHSIM_Rhsim12G0195700 PE=3 SV=1;tr|A0A6A4LBV9|A0A6A4LBV9_9ERIC Aminotran_1_2 domain-containing protein (Fragment) OS=Rhododendron williamsianum OX=262921 GN=C3L33_14	Aminotran_1_2 domain-containing protein	A0A834G1M8	8.83002e+06	6.74516e+06	4.9539e+07	0.76389	5.6103	7.34438	3	3	3	9.5	9.5	9.5	49.828	39.433
tr|A0A6A4KMR0|A0A6A4KMR0_9ERIC Uncharacterized protein (Fragment) OS=Rhododendron williamsianum OX=262921 GN=C3L33_22717 PE=3 SV=1;tr|A0A834LQF6|A0A834LQF6_RHOSS Uncharacterized protein OS=Rhododendron simsii OX=118357 GN=RHSIM_Rhsim04G0127300 PE=3 SV=1	Acyl-coenzyme A oxidase 4, peroxisomal	A0A6A4KMR0	5.47393e+06	4.31572e+06	2.90695e+07	0.788414	5.31054	6.73572		4	4	13.7	13.7	13.7	50.295	179.49
tr|A0A834G4T4|A0A834G4T4_RHOSS Uncharacterized protein OS=Rhododendron simsii OX=118357 GN=RHSIM_Rhsim12G0006200 PE=3 SV=1;tr|A0A6A4LBA2|A0A6A4LBA2_9ERIC Uncharacterized protein (Fragment) OS=Rhododendron williamsianum OX=262921 GN=C3L33_13201 PE=3 SV=1	Patellin-3-like	A0A834G4T4	1.03509e+07	2.38045e+07	5.30465e+07	2.29976	5.12483	2.22842	2	2	2	4.7	4.7	4.7	68.129	176.68
tr|A0A834H0C3|A0A834H0C3_RHOSS S-adenosylmethionine synthase OS=Rhododendron simsii OX=118357 GN=RHSIM_Rhsim05G0121700 PE=3 SV=1	S-adenosylmethionine synthase	A0A834H0C3	7.56942e+06	3.49556e+07	3.73269e+07	4.61801	4.93127	1.06784	13	3	3	38.9	9.7	9.7	43.048	21.867
tr|A0A834GFN9|A0A834GFN9_RHOSS PKS_ER domain-containing protein OS=Rhododendron simsii OX=118357 GN=RHSIM_Rhsim10G0174500 PE=3 SV=1;tr|A0A834GBM9|A0A834GBM9_RHOSS PKS_ER domain-containing protein OS=Rhododendron simsii OX=118357 GN=RHSIM_Rhsim10G0174300 PE	PKS_ER domain-containing protein	A0A834GFN9	1.4091e+08	2.9878e+08	6.15935e+08	2.12036	4.37112	2.0615	6	6	3	16.9	16.9	7.5	39.041	44.971
tr|A0A834LB94|A0A834LB94_RHOSS PKS_ER domain-containing protein OS=Rhododendron simsii OX=118357 GN=RHSIM_Rhsim11G0160000 PE=4 SV=1	PKS_ER domain-containing protein	A0A834LB94	6.57319e+06	8.41923e+06	2.7991e+07	1.28084	4.25836	3.32465	4	4	1	14.7	14.7	7.8	37.793	30.187
tr|A0A6A4L444|A0A6A4L444_9ERIC Uncharacterized protein (Fragment) OS=Rhododendron williamsianum OX=262921 GN=C3L33_15155 PE=3 SV=1;tr|A0A834HBC9|A0A834HBC9_RHOSS Uncharacterized protein OS=Rhododendron simsii OX=118357 GN=RHSIM_Rhsim02G0053400 PE=3 SV=1	3-ketoacyl-CoA thiolase 2, peroxisomal	A0A6A4L444	4.96226e+06	3.94106e+06	1.8231e+07	0.794207	3.67393	4.62591	4	4	2	11.7	11.7	6.3	46.9	71.449
tr|A0A6A4LHK2|A0A6A4LHK2_9ERIC Uncharacterized protein (Fragment) OS=Rhododendron williamsianum OX=262921 GN=C3L33_12130 PE=4 SV=1;tr|A0A834HBG6|A0A834HBG6_RHOSS Uncharacterized protein OS=Rhododendron simsii OX=118357 GN=RHSIM_Rhsim04G0102400 PE=4 SV=1	Galactose-binding domain-like protein	A0A6A4LHK2	6.7172e+06	2.15012e+07	2.3596e+07	3.20091	3.51278	1.09743	2	2	2	9.1	9.1	9.1	36.727	14.055
tr|A0A834GQ61|A0A834GQ61_RHOSS Uncharacterized protein OS=Rhododendron simsii OX=118357 GN=RHSIM_Rhsim07G0252800 PE=3 SV=1;tr|A0A6A4LQ76|A0A6A4LQ76_9ERIC Uncharacterized protein (Fragment) OS=Rhododendron williamsianum OX=262921 GN=C3L33_09434 PE=3 SV=1	L-ascorbate oxidase-like protein	A0A834GQ61	1.01846e+08	1.83085e+08	3.2535e+08	1.79766	3.19453	1.77704	8	8	4	18.3	18.3	9.4	59.791	209.43
tr|A0A834H8W0|A0A834H8W0_RHOSS Uncharacterized protein OS=Rhododendron simsii OX=118357 GN=RHSIM_Rhsim03G0042000 PE=3 SV=1;tr|A0A834H951|A0A834H951_RHOSS Uncharacterized protein OS=Rhododendron simsii OX=118357 GN=RHSIM_Rhsim03G0041800 PE=3 SV=1;tr|A0A834F	Cystathionine beta-lyase	A0A834H8W0	2.77522e+06	4.7067e+06	8.44894e+06	1.69598	3.04442	1.79509	2	2	2	11.7	11.7	11.7	32.844	44.326
tr|A0A834GJ02|A0A834GJ02_RHOSS PKS_ER domain-containing protein OS=Rhododendron simsii OX=118357 GN=RHSIM_Rhsim09G0052100 PE=4 SV=1	PKS_ER domain-containing protein	A0A834GJ02	2.64007e+07	9.0866e+07	7.73615e+07	3.4418	2.93028	0.851381	4	4	1	6.3	6.3	3.1	60.227	33.435
tr|A0A834LQF7|A0A834LQF7_RHOSS Protein kinase domain-containing protein OS=Rhododendron simsii OX=118357 GN=RHSIM_Rhsim04G0247700 PE=3 SV=1;tr|A0A6A4LBW2|A0A6A4LBW2_9ERIC Protein kinase domain-containing protein (Fragment) OS=Rhododendron williamsianum OX=	Protein kinase domain-containing protein	A0A834LQF7	1.36924e+07	1.71015e+07	3.98685e+07	1.24898	2.91173	2.33129	4	3	3	9.8	7.8	7.8	41.74	40.612
tr|A0A834GZK8|A0A834GZK8_RHOSS Eukaryotic translation initiation factor 3 subunit A OS=Rhododendron simsii OX=118357 GN=RHSIM_Rhsim05G0135800 PE=3 SV=1;tr|A0A6A4KZ65|A0A6A4KZ65_9ERIC PCI domain-containing protein (Fragment) OS=Rhododendron williamsianum OX	Eukaryotic translation initiation factor 3 subunit A	A0A834GZK8	4.51284e+06	1.26271e+07	1.25933e+07	2.79805	2.79054	0.997317	4	4	4	5.2	5.2	5.2	110.7	288.05
tr|A0A834HCB8|A0A834HCB8_RHOSS Aldo_ket_red domain-containing protein OS=Rhododendron simsii OX=118357 GN=RHSIM_Rhsim02G0056400 PE=4 SV=1	Aldo_ket_red domain-containing protein	A0A834HCB8	5.83065e+06	5.87319e+06	1.61855e+07	1.0073	2.77594	2.75583	2	2	1	5.9	5.9	2.7	45.249	40.974
tr|A0A6A4LI26|A0A6A4LI26_9ERIC COPIIcoated_ERV domain-containing protein (Fragment) OS=Rhododendron williamsianum OX=262921 GN=C3L33_07798 PE=4 SV=1;tr|A0A834GPU5|A0A834GPU5_RHOSS Uncharacterized protein OS=Rhododendron simsii OX=118357 GN=RHSIM_Rhsim07G01	COPIIcoated_ERV domain-containing protein	A0A6A4LI26	4.68567e+06	2.72061e+07	1.19067e+07	5.80623	2.5411	0.43765	3	3	3	11.7	11.7	11.7	36.165	18.702
tr|A0A834H5A8|A0A834H5A8_RHOSS Uncharacterized protein OS=Rhododendron simsii OX=118357 GN=RHSIM_Rhsim03G0041200 PE=3 SV=1	Protein S-acyltransferase	A0A834H5A8	1.39258e+07	3.17488e+07	3.13583e+07	2.27986	2.25181	0.987699	2	2	2	1.3	1.3	1.3	87.601	19.493
tr|A0A834HJL6|A0A834HJL6_RHOSS Serine/threonine-protein phosphatase OS=Rhododendron simsii OX=118357 GN=RHSIM_Rhsim01G0200700 PE=3 SV=1;tr|A0A6A4LVT2|A0A6A4LVT2_9ERIC Serine/threonine-protein phosphatase (Fragment) OS=Rhododendron williamsianum OX=262921 G	Serine/threonine-protein phosphatase	A0A834HJL6	1.11692e+07	1.65674e+07	2.3907e+07	1.4833	2.14043	1.44302	7	7	1	8.2	8.2	1.1	110.75	43.996
tr|A0A6A4KS07|A0A6A4KS07_9ERIC Adenosine kinase (Fragment) OS=Rhododendron williamsianum OX=262921 GN=C3L33_20155 PE=3 SV=1;tr|A0A834LQY4|A0A834LQY4_RHOSS Adenosine kinase OS=Rhododendron simsii OX=118357 GN=RHSIM_Rhsim05G0179500 PE=3 SV=1	Adenosine kinase	A0A6A4KS07	1.2819e+08	1.5146e+08	2.6378e+08	1.18152	2.05773	1.74159	6	6	3	18.4	18.4	10.1	41.72	323.31
tr|A0A076NBT0|A0A076NBT0_VACCO O-methyltransferase OS=Vaccinium corymbosum OX=69266 PE=2 SV=1	O-methyltransferase	A0A076NBT0	1.3978e+07	2.91463e+07	2.8161e+07	2.08515	2.01467	0.966196	3	3	2	11.6	11.6	8.6	40.33	120.19
tr|A0A6A4L4F0|A0A6A4L4F0_9ERIC Epimerase domain-containing protein (Fragment) OS=Rhododendron williamsianum OX=262921 GN=C3L33_15021 PE=4 SV=1;tr|A0A834LU30|A0A834LU30_RHOSS Epimerase domain-containing protein OS=Rhododendron simsii OX=118357 GN=RHSIM_Rhsi	Epimerase domain-containing protein	A0A6A4L4F0	9.89525e+07	1.42012e+08	1.9896e+08	1.43515	2.01066	1.40101	13	13	2	35	35	6.1	42.606	323.31
tr|X5I323|X5I323_9ERIC Action OS=Vaccinium ashei OX=945837 GN=ACT PE=2 SV=1;tr|A0A834GAI3|A0A834GAI3_RHOSS Uncharacterized protein OS=Rhododendron simsii OX=118357 GN=RHSIM_Rhsim10G0141300 PE=3 SV=1;tr|A0A6A4KQ81|A0A6A4KQ81_9ERIC Uncharacterized protein (F	Action	X5I323	8.0336e+08	1.03466e+09	1.5601e+09	1.28792	1.94197	1.50783	16	16	6	49.3	49.3	16.7	41.695	323.31
tr|A0A834H0N4|A0A834H0N4_RHOSS Sec16_C domain-containing protein OS=Rhododendron simsii OX=118357 GN=RHSIM_Rhsim07G0059400 PE=3 SV=1;tr|A0A6A4LWK5|A0A6A4LWK5_9ERIC Sec16_C domain-containing protein (Fragment) OS=Rhododendron williamsianum OX=262921 GN=C3L3	Sec16_C domain-containing protein	A0A834H0N4	4.48419e+07	7.40825e+07	7.6826e+07	1.65208	1.71327	1.03703	5	5	5	5.4	5.4	5.4	126.3	214.61
tr|A0A834LFI5|A0A834LFI5_RHOSS Uncharacterized protein OS=Rhododendron simsii OX=118357 GN=RHSIM_Rhsim07G0088700 PE=3 SV=1;tr|A0A6A4LNY6|A0A6A4LNY6_9ERIC Uncharacterized protein (Fragment) OS=Rhododendron williamsianum OX=262921 GN=C3L33_08538 PE=3 SV=1	Beta-adaptin-like protein	A0A834LFI5	6.00244e+07	1.05356e+08	9.18565e+07	1.75521	1.53032	0.871872	15	15	15	22.7	22.7	22.7	103.06	240.94
tr|A0A834GGF6|A0A834GGF6_RHOSS Uncharacterized protein OS=Rhododendron simsii OX=118357 GN=RHSIM_Rhsim08G0128800 PE=3 SV=1;tr|A0A6A4MNK6|A0A6A4MNK6_9ERIC Uncharacterized protein (Fragment) OS=Rhododendron williamsianum OX=262921 GN=C3L33_01015 PE=3 SV=1	Beta-glucosidase 44	A0A834GGF6	5.03063e+06	7.05141e+06	4.48795e+06	1.4017	0.892125	0.636462	2	2	2	3.7	3.7	3.7	61.239	15.628
Downexpression during ripening (V>I>R)
Fasta headers	Protein name	Uniprot id	Green	Veraisoned	Red	Ratio Veraisoned/Green	Ratio Red/Green	Ratio Red/Veraisoned	Peptides	Razor + unique peptides	Unique peptides	Sequence coverage [%]	Unique + razor sequence coverage [%]	Unique sequence coverage [%]	Mol. weight [kDa]	Score
tr|A0A834GRS0|A0A834GRS0_RHOSS Uncharacterized protein OS=Rhododendron simsii OX=118357 GN=RHSIM_Rhsim06G0162500 PE=3 SV=1;tr|A0A6A4LKS3|A0A6A4LKS3_9ERIC Uncharacterized protein (Fragment) OS=Rhododendron williamsianum OX=262921 GN=C3L33_10185 PE=3 SV=1	Aconitase	A0A834GRS0	2.5715e+07	2.44754e+07	5.23397e+06	0.951794	0.203538	0.213847	7	3	2	9.5	4.9	4	111.69	323.31
tr|A0A834GY77|A0A834GY77_RHOSS Aminotran_1_2 domain-containing protein OS=Rhododendron simsii OX=118357 GN=RHSIM_Rhsim07G0102700 PE=3 SV=1;tr|A0A6A4LY78|A0A6A4LY78_9ERIC Aminotran_1_2 domain-containing protein (Fragment) OS=Rhododendron williamsianum OX=26	Aminotran_1_2 domain-containing protein	A0A834GY77	1.4332e+08	1.47325e+08	3.42111e+07	1.02794	0.238705	0.232215	5	5	2	6.9	6.9	2	87.382	323.31
tr|A0A6A4M5X0|A0A6A4M5X0_9ERIC E1 ubiquitin-activating enzyme (Fragment) OS=Rhododendron williamsianum OX=262921 GN=C3L33_04471 PE=3 SV=1;tr|A0A834HHP5|A0A834HHP5_RHOSS E1 ubiquitin-activating enzyme OS=Rhododendron simsii OX=118357 GN=RHSIM_Rhsim01G023990	E1 ubiquitin-activating enzyme	A0A6A4M5X0	2.24245e+07	1.31e+07	5.62478e+06	0.584184	0.250832	0.429372	4	2	2	3.8	2.1	2.1	126.51	47.628
tr|A0A834GR00|A0A834GR00_RHOSS Malic enzyme OS=Rhododendron simsii OX=118357 GN=RHSIM_Rhsim07G0018800 PE=3 SV=1;tr|A0A6A4LHM4|A0A6A4LHM4_9ERIC Malic enzyme (Fragment) OS=Rhododendron williamsianum OX=262921 GN=C3L33_08008 PE=3 SV=1	Malic enzyme	A0A834GR00	2.16615e+07	1.34143e+07	5.49604e+06	0.619267	0.253724	0.409716	3	3	3	6.1	6.1	6.1	66.637	74.213
tr|A0A6A4LP41|A0A6A4LP41_9ERIC Sucrose-phosphate synthase (Fragment) OS=Rhododendron williamsianum OX=262921 GN=C3L33_05417 PE=3 SV=1;tr|A0A6A4L3Y0|A0A6A4L3Y0_9ERIC Sucrose-phosphate synthase (Fragment) OS=Rhododendron williamsianum OX=262921 GN=C3L33_1591	Sucrose-phosphate synthase	A0A6A4LP41	2.00618e+07	2.25579e+07	5.38085e+06	1.12442	0.268214	0.238535	4	4	1	5	5	0.8	105.71	26.054
tr|A0A834GG08|A0A834GG08_RHOSS Ubiquitinyl hydrolase 1 OS=Rhododendron simsii OX=118357 GN=RHSIM_Rhsim09G0140000 PE=3 SV=1;tr|A0A6A4L8L6|A0A6A4L8L6_9ERIC Ubiquitinyl hydrolase 1 (Fragment) OS=Rhododendron williamsianum OX=262921 GN=C3L33_16853 PE=3 SV=1	Ubiquitinyl hydrolase 1	A0A834GG08	5.7798e+07	3.49905e+07	1.80961e+07	0.605393	0.313092	0.517171	11	11	3	6.8	6.8	1.7	166.8	181.72
tr|A0A6A4M0P7|A0A6A4M0P7_9ERIC Alpha-aminoacylpeptide hydrolase (Fragment) OS=Rhododendron williamsianum OX=262921 GN=C3L33_07779 PE=3 SV=1;tr|A0A834H033|A0A834H033_RHOSS Aminopeptidase OS=Rhododendron simsii OX=118357 GN=RHSIM_Rhsim07G0175300 PE=3 SV=1	Alpha-aminoacylpeptide hydrolase	A0A6A4M0P7	3.13795e+07	1.89881e+07	1.03125e+07	0.605112	0.328638	0.543103	3	3	3	4.4	4.4	4.4	80.327	27.585
tr|A0A834LIC4|A0A834LIC4_RHOSS Transketolase OS=Rhododendron simsii OX=118357 GN=RHSIM_Rhsim07G0028800 PE=3 SV=1;tr|A0A6A4LZT4|A0A6A4LZT4_9ERIC Transketolase (Fragment) OS=Rhododendron williamsianum OX=262921 GN=C3L33_08092 PE=3 SV=1	Transketolase Transketolase Transketolase	A0A834LIC4	4.81085e+07	2.64051e+07	1.70117e+07	0.548865	0.353612	0.64426	8	8	5	14.6	14.6	10.8	80.175	71.834
tr|A0A6A4LMQ1|A0A6A4LMQ1_9ERIC Uncharacterized protein (Fragment) OS=Rhododendron williamsianum OX=262921 GN=C3L33_10407 PE=3 SV=1;tr|A0A834GVF1|A0A834GVF1_RHOSS 26S proteasome non-ATPase regulatory subunit 2 homolog OS=Rhododendron simsii OX=118357 GN=RHS	26S proteasome non-ATPase regulatory subunit 2 homolog	A0A6A4LMQ1	1.63665e+07	1.764e+07	5.86215e+06	1.07781	0.35818	0.332322	6	6	6	9	9	9	90.613	41.953
tr|A0A834LZ41|A0A834LZ41_RHOSS Uncharacterized protein OS=Rhododendron simsii OX=118357 GN=RHSIM_Rhsim01G0196200 PE=3 SV=1;tr|A0A6A4M9V2|A0A6A4M9V2_9ERIC Uncharacterized protein (Fragment) OS=Rhododendron williamsianum OX=262921 GN=C3L33_04792 PE=3 SV=1;tr	Protein argonaute 4-like	A0A834LZ41	1.76762e+07	1.71103e+07	7.04311e+06	0.967983	0.398451	0.41163	4	4	4	5.1	5.1	5.1	102.43	103.55
tr|A0A6A4LE63|A0A6A4LE63_9ERIC Uncharacterized protein (Fragment) OS=Rhododendron williamsianum OX=262921 GN=C3L33_11578 PE=3 SV=1;tr|A0A834L389|A0A834L389_RHOSS Uncharacterized protein OS=Rhododendron simsii OX=118357 GN=RHSIM_RhsimUnG0250200 PE=3 SV=1	Aconitase	A0A6A4LE63	2.0472e+08	1.46505e+08	8.82349e+07	0.715636	0.431003	0.602265	11	11	6	16.6	16.6	9.9	112.5	323.31
tr|A0A834LB86|A0A834LB86_RHOSS Uncharacterized protein OS=Rhododendron simsii OX=118357 GN=RHSIM_Rhsim11G0160800 PE=3 SV=1;tr|A0A6A4KSS7|A0A6A4KSS7_9ERIC Uncharacterized protein (Fragment) OS=Rhododendron williamsianum OX=262921 GN=C3L33_20941 PE=3 SV=1	Kynurenine formamidase	A0A834LB86	1.42159e+07	7.94267e+06	6.50155e+06	0.558719	0.457344	0.81856	2	2	2	4.5	4.5	4.5	56.591	123.44
tr|A0A834L639|A0A834L639_RHOSS Pyruvate kinase OS=Rhododendron simsii OX=118357 GN=RHSIM_Rhsim13G0234600 PE=3 SV=1;tr|A0A6A4LWF1|A0A6A4LWF1_9ERIC Pyruvate kinase (Fragment) OS=Rhododendron williamsianum OX=262921 GN=C3L33_05734 PE=3 SV=1	Pyruvate kinase	A0A834L639	3.1741e+07	2.21961e+07	1.45608e+07	0.699289	0.458737	0.656005	4	4	3	8.8	8.8	6.8	53.866	34.54
tr|A0A6A4LBB6|A0A6A4LBB6_9ERIC Uncharacterized protein (Fragment) OS=Rhododendron williamsianum OX=262921 GN=C3L33_16054 PE=4 SV=1	Peptidase_M1 domain-containing protein	A0A6A4LBB6	8.79575e+07	8.1228e+07	4.07628e+07	0.923491	0.463437	0.501832	7	7	2	8.2	8.2	4.4	97.754	128.24
tr|A0A6A4KYA1|A0A6A4KYA1_9ERIC Uncharacterized protein (Fragment) OS=Rhododendron williamsianum OX=262921 GN=C3L33_15616 PE=4 SV=1;tr|A0A834HCG5|A0A834HCG5_RHOSS Uncharacterized protein OS=Rhododendron simsii OX=118357 GN=RHSIM_Rhsim02G0149100 PE=3 SV=1	Glyco_transf_20 domain-containing protein	A0A6A4KYA1	1.19125e+07	1.21328e+07	5.86978e+06	1.01849	0.492741	0.483794	6	3	2	6.5	3.8	2.1	113.65	18.53
tr|A0A834GV24|A0A834GV24_RHOSS Peptidase_S9 domain-containing protein OS=Rhododendron simsii OX=118357 GN=RHSIM_Rhsim06G0046300 PE=4 SV=1	Methionine S-methyltransferase	A0A834GV24	4.0368e+07	3.06949e+07	2.15283e+07	0.760377	0.5333	0.701363	3	3	3	4.8	4.8	4.8	86.402	83.377
tr|A0A834LIZ7|A0A834LIZ7_RHOSS Peptidase A1 domain-containing protein OS=Rhododendron simsii OX=118357 GN=RHSIM_Rhsim07G0067500 PE=3 SV=1;tr|A0A6A4LU60|A0A6A4LU60_9ERIC Peptidase A1 domain-containing protein (Fragment) OS=Rhododendron williamsianum OX=2629	Peptidase A1 domain-containing protein	A0A834LIZ7	1.59645e+08	9.51497e+07	9.34715e+07	0.596008	0.585496	0.982363	7	7	7	17.7	17.7	17.7	47.472	94.104
tr|A0A6A4KS97|A0A6A4KS97_9ERIC Sucrose-phosphatase (Fragment) OS=Rhododendron williamsianum OX=262921 GN=C3L33_17623 PE=3 SV=1;tr|A0A834LCS5|A0A834LCS5_RHOSS Sucrose-phosphatase OS=Rhododendron simsii OX=118357 GN=RHSIM_Rhsim09G0022800 PE=3 SV=1	Sucrose-phosphatase	A0A6A4KS97	3.9185e+07	3.484e+07	2.35295e+07	0.889116	0.600472	0.675358	5	5	4	13	13	10.5	48.584	117.38
tr|A0A834LDB5|A0A834LDB5_RHOSS Gal_mutarotas_2 domain-containing protein OS=Rhododendron simsii OX=118357 GN=RHSIM_Rhsim10G0127500 PE=3 SV=1;tr|A0A6A4LHE6|A0A6A4LHE6_9ERIC Gal_mutarotas_2 domain-containing protein (Fragment) OS=Rhododendron williamsianum O	Gal_mutarotas_2 domain-containing protein	A0A834LDB5	1.39857e+07	1.32479e+07	9.26182e+06	0.947248	0.662236	0.699115	3	3	3	3.3	3.3	3.3	106.26	44.751
tr|A0A6A4MK32|A0A6A4MK32_9ERIC Uncharacterized protein (Fragment) OS=Rhododendron williamsianum OX=262921 GN=C3L33_00483 PE=3 SV=1	UVR domain-containing protein	A0A6A4MK32	1.6086e+07	1.47632e+07	1.095e+07	0.917767	0.680718	0.74171	2	2	1	3.2	3.2	1.6	90.798	16.583
tr|A0A834GD15|A0A834GD15_RHOSS Uricase OS=Rhododendron simsii OX=118357 GN=RHSIM_Rhsim09G0141100 PE=3 SV=1;tr|A0A6A4KU69|A0A6A4KU69_9ERIC Urate oxidase (Fragment) OS=Rhododendron williamsianum OX=262921 GN=C3L33_16843 PE=3 SV=1	Uricase	A0A834GD15	7.054e+06	5.91587e+06	4.88051e+06	0.838654	0.691878	0.824986	2	2	2	8.4	8.4	8.4	28.044	13.892
tr|A0A0A7NXC7|A0A0A7NXC7_9ERIC Ribulose bisphosphate carboxylase large chain (Fragment) OS=Erica vagans OX=270446 GN=rbcL PE=3 SV=1	Ribulose bisphosphate carboxylase large chain	A0A0A7NXC7	8.8659e+06	5.16817e+06	6.34251e+06	0.582926	0.715382	1.22723	19	2	2	40.4	9.7	9.7	43.041	26.801
tr|A0A834G5B1|A0A834G5B1_RHOSS Uncharacterized protein OS=Rhododendron simsii OX=118357 GN=RHSIM_Rhsim11G0034700 PE=3 SV=1;tr|A0A6A4KTY4|A0A6A4KTY4_9ERIC Uncharacterized protein (Fragment) OS=Rhododendron williamsianum OX=262921 GN=C3L33_21838 PE=3 SV=1	Alpha-glucosidase 2	A0A834G5B1	3.30177e+07	3.00731e+07	2.62403e+07	0.910817	0.794732	0.872549	4	4	4	3.6	3.6	3.6	131.31	48.384
tr|A0A834L7I4|A0A834L7I4_RHOSS Uncharacterized protein OS=Rhododendron simsii OX=118357 GN=RHSIM_Rhsim11G0165900 PE=4 SV=1;tr|A0A834L803|A0A834L803_RHOSS Methionine S-methyltransferase OS=Rhododendron simsii OX=118357 GN=RHSIM_Rhsim11G0117400 PE=3 SV=1;tr|	Methionine S-methyltransferase	A0A834L7I4	1.46616e+07	1.61847e+07	1.20594e+07	1.10388	0.822515	0.745111	2	2	2	3.1	3.1	3.1	88.128	15.171
Gaussian trend during ripening I>Vand R
Fasta headers	Protein name	Uniprot id	Green	Veraisoned	Red	Ratio Veraisoned/Green	Ratio Red/Green	Ratio Red/Veraisoned	Peptides	Razor + unique peptides	Unique peptides	Sequence coverage [%]	Unique + razor sequence coverage [%]	Unique sequence coverage [%]	Mol. weight [kDa]	Score
tr|A0A6A4KXE4|A0A6A4KXE4_9ERIC Uncharacterized protein (Fragment) OS=Rhododendron williamsianum OX=262921 GN=C3L33_17740 PE=3 SV=1;tr|A0A834GIW6|A0A834GIW6_RHOSS V-type proton ATPase subunit OS=Rhododendron simsii OX=118357 GN=RHSIM_Rhsim09G0146300 PE=3 SV	V-type proton ATPase subunit	A0A6A4KXE4	3.2269e+06	2.9971e+07	2.15246e+07	9.28786	6.67036	0.718181	3	3	3	12.4	12.4	12.4	29.242	21.923
tr|A0A6A4KPQ4|A0A6A4KPQ4_9ERIC Aminotran_1_2 domain-containing protein (Fragment) OS=Rhododendron williamsianum OX=262921 GN=C3L33_22702 PE=4 SV=1	Aminotran_1_2 domain-containing protein	A0A6A4KPQ4	6.55123e+06	4.71414e+07	3.85218e+07	7.1958	5.88009	0.817155	4	2	2	30	16.7	16.7	13.427	12.947
tr|A0A6A4MN12|A0A6A4MN12_9ERIC Uncharacterized protein (Fragment) OS=Rhododendron williamsianum OX=262921 GN=C3L33_01342 PE=3 SV=1;tr|A0A6A4KSK6|A0A6A4KSK6_9ERIC Tubulin_C domain-containing protein (Fragment) OS=Rhododendron williamsianum OX=262921 GN=C3L3	Tubulin alpha chain	A0A6A4MN12	8.51959e+06	5.1069e+07	4.61238e+06	5.9943	0.541386	0.0903167	2	2	2	6.5	6.5	6.5	38.933	30.819
tr|A0A834H419|A0A834H419_RHOSS Malate dehydrogenase [NADP], chloroplastic OS=Rhododendron simsii OX=118357 GN=RHSIM_Rhsim03G0111900 PE=3 SV=1	Malate dehydrogenase [NADP], chloroplastic	A0A834H419	6.63279e+06	3.56995e+07	2.05825e+07	5.38228	3.10314	0.576549	5	5	5	17	17	17	47.841	81.843
tr|A0A6A4LG53|A0A6A4LG53_9ERIC Phenylalanyl-tRNA synthetase (Fragment) OS=Rhododendron williamsianum OX=262921 GN=C3L33_11448 PE=3 SV=1;tr|A0A834H4R1|A0A834H4R1_RHOSS Phenylalanyl-tRNA synthetase OS=Rhododendron simsii OX=118357 GN=RHSIM_Rhsim04G0004400 PE	Phenylalanine--tRNA ligase	A0A6A4LG53	4.54652e+06	2.29065e+07	1.06512e+07	5.03825	2.34272	0.464987	2	2	2	5	5	5	53.45	13.516
tr|A0A834G0K1|A0A834G0K1_RHOSS Acetylornithine transaminase OS=Rhododendron simsii OX=118357 GN=RHSIM_Rhsim12G0188700 PE=3 SV=1;tr|A0A6A4L7J4|A0A6A4L7J4_9ERIC Acetylornithine transaminase (Fragment) OS=Rhododendron williamsianum OX=262921 GN=C3L33_14541 PE	Acetylornithine transaminase	A0A834G0K1	5.3059e+06	1.66485e+07	4.51994e+06	3.13773	0.851871	0.271493	2	2	2	8.1	8.1	8.1	48.429	165.13
tr|A0A6A4LFB0|A0A6A4LFB0_9ERIC Glucose-6-phosphate isomerase (Fragment) OS=Rhododendron williamsianum OX=262921 GN=C3L33_11042 PE=3 SV=1;tr|A0A834LJD1|A0A834LJD1_RHOSS Glucose-6-phosphate isomerase OS=Rhododendron simsii OX=118357 GN=RHSIM_Rhsim06G0034400	Glucose-6-phosphate isomerase	A0A6A4LFB0	4.61705e+06	1.40653e+07	9.2306e+06	3.04637	1.99924	0.656269	3	3	3	7.6	7.6	7.6	54.167	22.896
tr|A0A6A4MAP8|A0A6A4MAP8_9ERIC S-(hydroxymethyl)glutathione dehydrogenase (Fragment) OS=Rhododendron williamsianum OX=262921 GN=C3L33_04286 PE=3 SV=1;tr|A0A834M2I7|A0A834M2I7_RHOSS S-(hydroxymethyl)glutathione dehydrogenase OS=Rhododendron simsii OX=118357	S-(hydroxymethyl)glutathione dehydrogenase	A0A6A4MAP8	1.66635e+08	4.4988e+08	2.0058e+08	2.69979	1.20371	0.445852	6	6	6	15.9	15.9	15.9	41.122	176.86
tr|A0A6A4MFQ9|A0A6A4MFQ9_9ERIC PCI domain-containing protein (Fragment) OS=Rhododendron williamsianum OX=262921 GN=C3L33_01459 PE=3 SV=1	PCI domain-containing protein	A0A6A4MFQ9	1.61867e+07	3.89335e+07	1.15425e+07	2.40528	0.713087	0.296468	3	3	3	7.2	7.2	7.2	52.258	24.285
tr|A0A834LME0|A0A834LME0_RHOSS KH type-2 domain-containing protein OS=Rhododendron simsii OX=118357 GN=RHSIM_Rhsim05G0012000 PE=3 SV=1;tr|A0A834H588|A0A834H588_RHOSS KH type-2 domain-containing protein OS=Rhododendron simsii OX=118357 GN=RHSIM_Rhsim03G0229	KH type-2 domain-containing protein	A0A834LME0	1.40445e+07	3.0714e+07	8.23497e+06	2.1869	0.586347	0.268118	6	6	6	24.3	24.3	24.3	26.845	40.609
tr|A0A834LB58|A0A834LB58_RHOSS CTP_transf_like domain-containing protein OS=Rhododendron simsii OX=118357 GN=RHSIM_Rhsim09G0103900 PE=4 SV=1;tr|A0A6A4L6V0|A0A6A4L6V0_9ERIC CTP_transf_like domain-containing protein (Fragment) OS=Rhododendron williamsianum O	CTP_transf_like domain-containing protein	A0A834LB58	3.08938e+07	5.36172e+07	3.045e+07	1.73553	0.985632	0.567914	2	2	2	5.5	5.5	5.5	44.287	16.95
tr|A0A6A4LRB5|A0A6A4LRB5_9ERIC Elongation factor Tu (Fragment) OS=Rhododendron williamsianum OX=262921 GN=C3L33_07521 PE=3 SV=1;tr|A0A834L6A4|A0A834L6A4_RHOSS Elongation factor Tu OS=Rhododendron simsii OX=118357 GN=RHSIM_Rhsim13G0022100 PE=3 SV=1;tr|A0A83	Elongation factor Tu	A0A6A4LRB5	3.11553e+07	5.2524e+07	9.43073e+06	1.68588	0.302701	0.179551	6	5	5	18.1	14.7	14.7	48.173	54.599
tr|A0A834GI97|A0A834GI97_RHOSS GDP-mannose 4,6-dehydratase OS=Rhododendron simsii OX=118357 GN=RHSIM_Rhsim08G0034400 PE=3 SV=1	GDP-mannose 4,6-dehydratase	A0A834GI97	5.56265e+07	8.59335e+07	1.8131e+07	1.54483	0.325943	0.210989	8	8	4	21	21	12.1	41.741	62.199
tr|A0A6A4LMC4|A0A6A4LMC4_9ERIC Acylaminoacyl-peptidase (Fragment) OS=Rhododendron williamsianum OX=262921 GN=C3L33_12332 PE=3 SV=1;tr|A0A834H278|A0A834H278_RHOSS Acylaminoacyl-peptidase OS=Rhododendron simsii OX=118357 GN=RHSIM_Rhsim04G0195100 PE=3 SV=1	Acylaminoacyl-peptidase	A0A6A4LMC4	4.98473e+07	6.91425e+07	7.42721e+06	1.38709	0.148999	0.107419	7	7	7	11	11	11	87.717	117.37
tr|A0A834H2F3|A0A834H2F3_RHOSS Isoleucyl-tRNA synthetase OS=Rhododendron simsii OX=118357 GN=RHSIM_Rhsim05G0075700 PE=3 SV=1	Isoleucine--tRNA ligase	A0A834H2F3	4.13664e+07	5.41875e+07	4.72595e+07	1.30994	1.14246	0.872148	7	7	7	5.7	5.7	5.7	144.02	75.214
tr|A0A834HBZ4|A0A834HBZ4_RHOSS Adenosylhomocysteinase OS=Rhododendron simsii OX=118357 GN=RHSIM_Rhsim02G0062100 PE=3 SV=1;tr|A0A6A4L412|A0A6A4L412_9ERIC Adenosylhomocysteinase (Fragment) OS=Rhododendron williamsianum OX=262921 GN=C3L33_15205 PE=3 SV=1	Adenosylhomocysteinase	A0A834HBZ4	2.71145e+08	3.27775e+08	2.2388e+08	1.20885	0.825683	0.68303	10	10	5	20	20	9.3	53.219	265.85
tr|A0A6A4LEJ2|A0A6A4LEJ2_9ERIC ARMT1-like_dom domain-containing protein (Fragment) OS=Rhododendron williamsianum OX=262921 GN=C3L33_14354 PE=3 SV=1;tr|A0A834G5N0|A0A834G5N0_RHOSS Pantothenate kinase 2 OS=Rhododendron simsii OX=118357 GN=RHSIM_Rhsim12G01647	ARMT1-like_dom domain-containing protein	A0A6A4LEJ2	1.05217e+07	1.24947e+07	5.33172e+06	1.18752	0.506737	0.426718	4	4	4	5.5	5.5	5.5	94.312	45.934
tr|A0A6A4MHM7|A0A6A4MHM7_9ERIC Uncharacterized protein (Fragment) OS=Rhododendron williamsianum OX=262921 GN=C3L33_01031 PE=3 SV=1;tr|A0A834LFM3|A0A834LFM3_RHOSS Uncharacterized protein OS=Rhododendron simsii OX=118357 GN=RHSIM_Rhsim08G0126700 PE=3 SV=1	Hydroxyacid dehydrogenase	A0A6A4MHM7	1.68786e+07	1.94538e+07	4.27331e+06	1.15258	0.25318	0.219665	2	2	2	2.3	2.3	2.3	92.31	12.21
Gaussian trend during ripening I<Vand R
Fasta headers	Protein name	Uniprot id	Green	Veraisoned	Red	Ratio Veraisoned/Green	Ratio Red/Green	Ratio Red/Veraisoned	Peptides	Razor + unique peptides	Unique peptides	Sequence coverage [%]	Unique + razor sequence coverage [%]	Unique sequence coverage [%]	Mol. weight [kDa]	Score
tr|A0A834H8M9|A0A834H8M9_RHOSS Fructose-bisphosphate aldolase OS=Rhododendron simsii OX=118357 GN=RHSIM_Rhsim04G0009800 PE=3 SV=1	Fructose-bisphosphate aldolase	A0A834H8M9	6.57025e+08	6.37778e+06	7.763e+08	0.00970706	1.18154	121.719	3	3	2	6.4	6.4	4.2	38.393	83.71
tr|A0A834LHJ1|A0A834LHJ1_RHOSS Aldo_ket_red domain-containing protein OS=Rhododendron simsii OX=118357 GN=RHSIM_Rhsim08G0011000 PE=4 SV=1;tr|A0A834LKV8|A0A834LKV8_RHOSS Aldo_ket_red domain-containing protein OS=Rhododendron simsii OX=118357 GN=RHSIM_Rhsim0	Aldo_ket_red domain-containing protein	A0A834LHJ1	3.6898e+07	3.38057e+06	4.22365e+07	0.0916193	1.14468	12.4939	4	4	1	11.6	11.6	2.3	38.383	61.606
tr|A0A834GX72|A0A834GX72_RHOSS Uncharacterized protein OS=Rhododendron simsii OX=118357 GN=RHSIM_Rhsim05G0056500 PE=3 SV=1	Glycerate dehydrogenase HPR, peroxisomal	A0A834GX72	9.92466e+07	5.58773e+06	6.5323e+07	0.0563015	0.658189	11.6904	5	5	5	15.1	15.1	15.1	42.602	32.63
tr|A0A6A4L1K3|A0A6A4L1K3_9ERIC Beta-fructofuranosidase (Fragment) OS=Rhododendron williamsianum OX=262921 GN=C3L33_16481 PE=3 SV=1;tr|A0A834GFK9|A0A834GFK9_RHOSS Beta-fructofuranosidase OS=Rhododendron simsii OX=118357 GN=RHSIM_Rhsim09G0191800 PE=3 SV=1;tr	Beta-fructofuranosidase	A0A6A4L1K3	4.43016e+07	9.0077e+06	9.0556e+07	0.203327	2.04408	10.0532	3	3	3	6.2	6.2	6.2	60.885	21.447
tr|A0A834H072|A0A834H072_RHOSS (S)-2-hydroxy-acid oxidase OS=Rhododendron simsii OX=118357 GN=RHSIM_Rhsim04G0033100 PE=3 SV=1;tr|A0A834G7C1|A0A834G7C1_RHOSS (S)-2-hydroxy-acid oxidase OS=Rhododendron simsii OX=118357 GN=RHSIM_Rhsim13G0114900 PE=3 SV=1;tr|A	(S)-2-hydroxy-acid oxidase	A0A834H072	8.1539e+07	6.862e+06	6.63505e+07	0.0841561	0.813727	9.66927	7	7	3	18.3	18.3	7.4	40.367	61.07
tr|A0A6A4KYX0|A0A6A4KYX0_9ERIC Ribos_L4_asso_C domain-containing protein (Fragment) OS=Rhododendron williamsianum OX=262921 GN=C3L33_20208 PE=3 SV=1;tr|A0A834FV85|A0A834FV85_RHOSS Ribos_L4_asso_C domain-containing protein OS=Rhododendron simsii OX=118357 G	Ribos_L4_asso_C domain-containing protein	A0A6A4KYX0	9.45135e+07	6.14641e+06	4.3819e+07	0.0650321	0.463627	7.1292	7	7	7	13.5	13.5	13.5	43.244	115.85
tr|A0A6A4L5S1|A0A6A4L5S1_9ERIC RPN2_C domain-containing protein (Fragment) OS=Rhododendron williamsianum OX=262921 GN=C3L33_15170 PE=3 SV=1;tr|A0A834HA09|A0A834HA09_RHOSS 26S proteasome non-ATPase regulatory subunit 1 homolog OS=Rhododendron simsii OX=1183	RPN2_C domain-containing protein	A0A6A4L5S1	3.30692e+07	4.24315e+06	2.97251e+07	0.128311	0.898875	7.00543	4	4	4	5.5	5.5	5.5	96.206	45.23
tr|A0A1J0A0R5|A0A1J0A0R5_RHOML RPL3 OS=Rhododendron molle OX=49168 GN=RPL3 PE=2 SV=1;tr|A0A6A4KZE7|A0A6A4KZE7_9ERIC Uncharacterized protein (Fragment) OS=Rhododendron williamsianum OX=262921 GN=C3L33_19794 PE=3 SV=1;tr|A0A6A4KUY8|A0A6A4KUY8_9ERIC Uncharact	RPL3	A0A1J0A0R5	7.07215e+07	5.22836e+06	3.38451e+07	0.0739288	0.478568	6.47336	9	9	9	20.1	20.1	20.1	44.42	112.59
tr|A0A6A4LNT2|A0A6A4LNT2_9ERIC PCI domain-containing protein (Fragment) OS=Rhododendron williamsianum OX=262921 GN=C3L33_11850 PE=4 SV=1;tr|A0A834GKM5|A0A834GKM5_RHOSS PCI domain-containing protein OS=Rhododendron simsii OX=118357 GN=RHSIM_Rhsim08G0185100	PCI domain-containing protein	A0A6A4LNT2	4.80595e+07	4.59886e+06	2.62709e+07	0.0956909	0.546633	5.71249	5	5	5	15.5	15.5	15.5	44.32	70.849
tr|A0A6A4LTT7|A0A6A4LTT7_9ERIC ECH_2 domain-containing protein (Fragment) OS=Rhododendron williamsianum OX=262921 GN=C3L33_03661 PE=4 SV=1;tr|A0A834H780|A0A834H780_RHOSS ECH_2 domain-containing protein OS=Rhododendron simsii OX=118357 GN=RHSIM_Rhsim03G0244	ECH_2 domain-containing protein	A0A6A4LTT7	3.7282e+07	8.50035e+06	3.37359e+07	0.228001	0.904884	3.96877	4	4	4	9.5	9.5	9.5	47.166	76.847
tr|A0A834HIX9|A0A834HIX9_RHOSS Malate dehydrogenase OS=Rhododendron simsii OX=118357 GN=RHSIM_Rhsim02G0037400 PE=3 SV=1;tr|A0A6A4LAU6|A0A6A4LAU6_9ERIC Malate dehydrogenase (Fragment) OS=Rhododendron williamsianum OX=262921 GN=C3L33_15068 PE=3 SV=1;tr|I1U4K	Malate dehydrogenase	A0A834HIX9	1.87319e+07	7.31598e+06	2.4028e+07	0.390562	1.28273	3.28432	4	4	4	6.6	6.6	6.6	88.91	286.22
tr|A0A834GU39|A0A834GU39_RHOSS Phosphoglycerate kinase OS=Rhododendron simsii OX=118357 GN=RHSIM_Rhsim05G0232900 PE=3 SV=1;tr|A0A6A4KVZ3|A0A6A4KVZ3_9ERIC Phosphoglycerate kinase (Fragment) OS=Rhododendron williamsianum OX=262921 GN=C3L33_20583 PE=3 SV=1	Phosphoglycerate kinase	A0A834GU39	3.28315e+08	8.44754e+07	2.7631e+08	0.2573	0.8416	3.27089	14	14	4	32.7	32.7	6.2	42.447	141.95
tr|A0A6A4KUL8|A0A6A4KUL8_9ERIC Carboxypeptidase (Fragment) OS=Rhododendron williamsianum OX=262921 GN=C3L33_16792 PE=3 SV=1;tr|A0A834LEX9|A0A834LEX9_RHOSS Carboxypeptidase OS=Rhododendron simsii OX=118357 GN=RHSIM_Rhsim09G0147200 PE=3 SV=1;tr|A0A6A4LYS4|A0	Carboxypeptidase	A0A6A4KUL8	1.08935e+07	3.8176e+06	1.16663e+07	0.350448	1.07094	3.05592	2	2	2	4.6	4.6	4.6	56.062	15.902
tr|A0A834LXF4|A0A834LXF4_RHOSS Uncharacterized protein OS=Rhododendron simsii OX=118357 GN=RHSIM_Rhsim01G0235200 PE=4 SV=1;tr|A0A6A4LRL3|A0A6A4LRL3_9ERIC Uncharacterized protein (Fragment) OS=Rhododendron williamsianum OX=262921 GN=C3L33_04511 PE=4 SV=1;tr	Beta-glucosidase	A0A834LXF4	2.9223e+07	7.70295e+06	2.25625e+07	0.263592	0.772081	2.92907	3	3	1	5.1	5.1	2	66.356	29.642
tr|G1CT32|G1CT32_RHOIN Glyceraldehyde-3-phosphate dehydrogenase GAPC2 (Fragment) OS=Rhododendron indicum OX=75581 PE=3 SV=1	Glyceraldehyde-3-phosphate dehydrogenase GAPC2	G1CT32	9.31434e+06	4.79283e+06	1.40237e+07	0.514564	1.50561	2.92598	3	3	2	11.9	11.9	5.9	21.221	19.498
tr|A0A6A4KRH6|A0A6A4KRH6_9ERIC Uncharacterized protein (Fragment) OS=Rhododendron williamsianum OX=262921 GN=C3L33_19787 PE=3 SV=1;tr|A0A834H687|A0A834H687_RHOSS Uncharacterized protein OS=Rhododendron simsii OX=118357 GN=RHSIM_Rhsim05G0113400 PE=3 SV=1	Heat shock protein 70 family	A0A6A4KRH6	3.69813e+07	8.93576e+06	2.53661e+07	0.241629	0.685916	2.83871	10	10	1	17.9	17.9	1.7	61.575	220.28
tr|A0A834LHP7|A0A834LHP7_RHOSS Uncharacterized protein OS=Rhododendron simsii OX=118357 GN=RHSIM_Rhsim07G0093000 PE=4 SV=1	Protein P21-like	A0A834LHP7	3.8731e+07	5.58551e+06	1.57197e+07	0.144213	0.405868	2.81437	2	2	2	10.1	10.1	10.1	24.095	42.028
tr|A0A6A4LYW7|A0A6A4LYW7_9ERIC Ubiquitinyl hydrolase 1 (Fragment) OS=Rhododendron williamsianum OX=262921 GN=C3L33_04771 PE=3 SV=1	Ubiquitinyl hydrolase 1	A0A6A4LYW7	1.944e+07	6.61399e+06	1.7522e+07	0.340225	0.901337	2.64924	9	5	1	8.3	5.2	0.9	125.98	59.517
tr|A0A834LZN0|A0A834LZN0_RHOSS Lactase OS=Rhododendron simsii OX=118357 GN=RHSIM_Rhsim01G0124100 PE=3 SV=1;tr|A0A6A4LY11|A0A6A4LY11_9ERIC Lactase (Fragment) OS=Rhododendron williamsianum OX=262921 GN=C3L33_05122 PE=3 SV=1	Beta-galactosidase	A0A834LZN0	2.56773e+07	5.97432e+06	1.46213e+07	0.232669	0.569424	2.44736	2	2	2	1.2	1.2	1.2	183.86	12.381
tr|Q71N69|Q71N69_PHYCU Ribulose bisphosphate carboxylase large chain (Fragment) OS=Phyllodoce caerulea OX=49155 GN=rbcL PE=3 SV=1	Ribulose bisphosphate carboxylase large chain	Q71N69	2.3411e+07	5.3021e+06	1.14285e+07	0.226479	0.48817	2.15547	17	2	0	37.1	5.3	0	46.998	33.261
tr|A0A834H781|A0A834H781_RHOSS Aldedh domain-containing protein OS=Rhododendron simsii OX=118357 GN=RHSIM_Rhsim03G0256500 PE=3 SV=1;tr|A0A834LIJ6|A0A834LIJ6_RHOSS Aldedh domain-containing protein OS=Rhododendron simsii OX=118357 GN=RHSIM_Rhsim07G0163900 PE	Aldedh domain-containing protein	A0A834H781	1.89385e+07	6.30552e+06	1.35149e+07	0.332947	0.713623	2.14335	5	5	5	15.7	15.7	15.7	53.115	82.404
tr|A0A834LQ21|A0A834LQ21_RHOSS Pyruvate decarboxylase OS=Rhododendron simsii OX=118357 GN=RHSIM_Rhsim05G0219500 PE=3 SV=1	Pyruvate decarboxylase	A0A834LQ21	4.10035e+07	3.34564e+07	6.5224e+07	0.81594	1.59069	1.94952	5	5	5	8.8	8.8	8.8	68.165	62.153
tr|A0A834G2M6|A0A834G2M6_RHOSS Amidohydro-rel domain-containing protein OS=Rhododendron simsii OX=118357 GN=RHSIM_Rhsim13G0210400 PE=4 SV=1	Amidohydro-rel domain-containing protein	A0A834G2M6	7.59245e+07	4.83351e+06	8.55072e+06	0.0636621	0.112621	1.76905	3	3	1	11.6	11.6	4.2	23.672	26.736
tr|A0A834L814|A0A834L814_RHOSS Aldehyde dehydrogenase (NAD(+)) OS=Rhododendron simsii OX=118357 GN=RHSIM_Rhsim12G0211100 PE=3 SV=1;tr|A0A834G1P2|A0A834G1P2_RHOSS Aldehyde dehydrogenase (NAD(+)) OS=Rhododendron simsii OX=118357 GN=RHSIM_Rhsim12G0210700 PE=3	Aldehyde dehydrogenase (NAD(+))	A0A834L814	8.0644e+07	2.93437e+07	5.1612e+07	0.363867	0.639998	1.75888	4	4	3	7.1	7.1	4.5	54.735	109.46
tr|A0A834HFD1|A0A834HFD1_RHOSS Uncharacterized protein OS=Rhododendron simsii OX=118357 GN=RHSIM_Rhsim01G0224200 PE=3 SV=1;tr|A0A6A4LRG3|A0A6A4LRG3_9ERIC Uncharacterized protein (Fragment) OS=Rhododendron williamsianum OX=262921 GN=C3L33_04588 PE=3 SV=1	11-S seed storage protein, plant	A0A834HFD1	1.02355e+08	5.88063e+07	1.00246e+08	0.57453	0.979395	1.70469	4	4	4	11.5	11.5	11.5	38.461	28.883
tr|A0A834GTU4|A0A834GTU4_RHOSS Uncharacterized protein OS=Rhododendron simsii OX=118357 GN=RHSIM_Rhsim07G0079900 PE=3 SV=1;tr|A0A834LS08|A0A834LS08_RHOSS Uncharacterized protein OS=Rhododendron simsii OX=118357 GN=RHSIM_Rhsim02G0248700 PE=4 SV=1;tr|A0A6A4L	Luminal-binding protein 5	A0A834GTU4	2.5464e+07	6.99039e+06	1.19035e+07	0.27452	0.467464	1.70284	8	5	4	14.4	10.5	8.4	73.612	277
tr|A0A834G7N9|A0A834G7N9_RHOSS S-methyl-5-thioribose kinase OS=Rhododendron simsii OX=118357 GN=RHSIM_Rhsim11G0159300 PE=3 SV=1;tr|A0A6A4KWF1|A0A6A4KWF1_9ERIC APH domain-containing protein (Fragment) OS=Rhododendron williamsianum OX=262921 GN=C3L33_20953 P	S-methyl-5-thioribose kinase	A0A834G7N9	1.3382e+08	5.33844e+07	8.31945e+07	0.398927	0.62169	1.55841	8	8	4	13.6	13.6	6.5	47.425	196.99
tr|A0A6A4L3X7|A0A6A4L3X7_9ERIC Fructose-bisphosphate aldolase (Fragment) OS=Rhododendron williamsianum OX=262921 GN=C3L33_13780 PE=3 SV=1	Fructose-bisphosphate aldolase	A0A6A4L3X7	4.24218e+07	1.959e+07	2.99605e+07	0.461792	0.706252	1.52937	2	2	1	6.1	6.1	3.8	37.859	160.87
tr|A0A6A4M8Z4|A0A6A4M8Z4_9ERIC PALP domain-containing protein (Fragment) OS=Rhododendron williamsianum OX=262921 GN=C3L33_01060 PE=3 SV=1;tr|A0A834GMQ0|A0A834GMQ0_RHOSS Uncharacterized protein OS=Rhododendron simsii OX=118357 GN=RHSIM_Rhsim08G0124200 PE=3	PALP domain-containing protein	A0A6A4M8Z4	2.23193e+07	9.04941e+06	1.24985e+07	0.405452	0.559988	1.38114	2	2	2	7	7	7	43.888	17.259
tr|A0A834LLS5|A0A834LLS5_RHOSS Aspartate--tRNA ligase OS=Rhododendron simsii OX=118357 GN=RHSIM_Rhsim07G0113300 PE=3 SV=1;tr|A0A834GRJ6|A0A834GRJ6_RHOSS Aspartate--tRNA ligase OS=Rhododendron simsii OX=118357 GN=RHSIM_Rhsim07G0113700 PE=3 SV=1;tr|A0A834LIQ	Aspartate--tRNA ligase	A0A834LLS5	6.24555e+07	3.60318e+07	4.28903e+07	0.57692	0.686734	1.19034	8	8	8	17.2	17.2	17.2	59.944	308.49
tr|A0A834G776|A0A834G776_RHOSS Tryptophanyl-tRNA synthetase OS=Rhododendron simsii OX=118357 GN=RHSIM_Rhsim12G0003500 PE=3 SV=1;tr|A0A6A4LI37|A0A6A4LI37_9ERIC Tryptophanyl-tRNA synthetase (Fragment) OS=Rhododendron williamsianum OX=262921 GN=C3L33_13173 PE	Tryptophan--tRNA ligase	A0A834G776	1.91155e+07	7.38757e+06	8.4e+06	0.38647	0.439434	1.13704	3	3	3	7.6	7.6	7.6	50.738	83.34
tr|A0A834FWC3|A0A834FWC3_RHOSS Aminotran_1_2 domain-containing protein OS=Rhododendron simsii OX=118357 GN=RHSIM_RhsimUnG0094700 PE=4 SV=1;tr|A0A6A4KUJ9|A0A6A4KUJ9_9ERIC Aminotran_1_2 domain-containing protein (Fragment) OS=Rhododendron williamsianum OX=26	Aminotran_1_2 domain-containing protein	A0A834FWC3	3.26415e+07	2.54507e+07	4.1023e+07	0.779702	1.25677	1.61186	5	5	5	15.8	15.8	15.8	48.996	84.157
tr|A0A834GT54|A0A834GT54_RHOSS Aspartate aminotransferase OS=Rhododendron simsii OX=118357 GN=RHSIM_Rhsim07G0162300 PE=3 SV=1;tr|A0A6A4KR64|A0A6A4KR64_9ERIC Aspartate aminotransferase (Fragment) OS=Rhododendron williamsianum OX=262921 GN=C3L33_22701 PE=3 S	Aspartate aminotransferase	A0A834GT54	1.38205e+08	9.43374e+07	1.64615e+08	0.682591	1.19109	1.74496	10	9	7	21.3	19.6	15.2	57.39	141.27
tr|A0A834GA44|A0A834GA44_RHOSS ATP synthase subunit beta OS=Rhododendron simsii OX=118357 GN=RHSIM_Rhsim10G0077400 PE=3 SV=1;tr|A0A6A4L2U1|A0A6A4L2U1_9ERIC ATP synthase subunit beta (Fragment) OS=Rhododendron williamsianum OX=262921 GN=C3L33_18617 PE=3 SV=	ATP synthase subunit beta	A0A834GA44	1.16399e+07	8.11793e+06	2.01763e+07	0.69742	1.73337	2.4854	6	2	2	16.1	7.1	7.1	59.124	106.26
tr|A0A834GQ77|A0A834GQ77_RHOSS Pyrophosphate--fructose 6-phosphate 1-phosphotransferase subunit alpha OS=Rhododendron simsii OX=118357 GN=PFP-ALPHA PE=3 SV=1	Pyrophosphate--fructose 6-phosphate 1-phosphotransferase subunit alpha	A0A834GQ77	1.9513e+07	1.2419e+07	2.50022e+07	0.636448	1.28131	2.01322	7	7	6	16.4	16.4	13.1	66.582	100.95
tr|A0A6A4LQC1|A0A6A4LQC1_9ERIC Catalase (Fragment) OS=Rhododendron williamsianum OX=262921 GN=C3L33_09406 PE=3 SV=1;tr|A0A6A4LR70|A0A6A4LR70_9ERIC Catalase (Fragment) OS=Rhododendron williamsianum OX=262921 GN=C3L33_11250 PE=3 SV=1;tr|A0A6A4L4Q2|A0A6A4L4Q2	Catalase	A0A6A4LQC1	4.0991e+07	2.45788e+07	8.5333e+07	0.599614	2.08175	3.47182	5	5	5	14.2	14.2	14.2	53.439	323.31
tr|A0A834G3A7|A0A834G3A7_RHOSS Phosphoglycerate mutase (2,3-diphosphoglycerate-independent) OS=Rhododendron simsii OX=118357 GN=RHSIM_Rhsim12G0013400 PE=3 SV=1;tr|A0A6A4LFD6|A0A6A4LFD6_9ERIC Phosphoglycerate mutase (2,3-diphosphoglycerate-independent) (Fra	Phosphoglycerate mutase (2,3-diphosphoglycerate-independent)	A0A834G3A7	5.89435e+07	3.44775e+07	5.54965e+07	0.584924	0.94152	1.60964	5	5	5	11.8	11.8	11.8	61.193	124.81
