# Supplementary material for: Multi-omic characterisation as a tool to improve knowledge, valorisation and conservation of wild fruit genetic resources: the case of Arbutus unedo L
Source: Front Plant Sci. 2023 Sep 8;14:1195673. doi: 10.3389/fpls.2023.1195673 (PMC10514896; doi:10.3389/fpls.2023.1195673)
Supplement: Supplementary file 2 [file Table_2.xlsx]

## Sheet: Foglio1
Supplementary File 3. Polyphenols identified in A. unedo fruit from Campania and Sicilia region at different ripening stages and in A.unedo leaves by LC-MS analysis (expressed as ng/g of fresh weight, ng/g FW)
ng/g FW
Antocyanins	AVE-CG	SD	CG Rep1	CG Rep2	CG Rep3	AVE- CV	SD	CV Rep1	CV Rep2	CV Rep3	AVE-CR	SD	CR Rep1	CR Rep2	CR Rep3	AVE-SG	SD	SG Rep1	SG Rep2	SG Rep3	AVE-SV	SD	SV Rep1	SV Rep2	SV Rep3	AVE-SR	SD	SR Rep1	SR Rep2	SR Rep3	CL Rep1	CL Rep2	CL Rep3	AVE-LC	SD	SL Rep1	SL Rep2	SL Rep3	AVE-LS	SD
Delphinidin-3-O-glucoside	2053.02	8.37114	2060.86	2053.99	2044.2	732.288	7.70556	734.602	723.69	738.571	1066.52	7.03293	1060.3	1074.15	1065.09	3640.04	63.2298	3570.52	3655.47	3694.12	1343.87	29.6858	1366.07	1355.38	1310.15	2334.87	28.3043	2331.63	2364.66	2308.33	16.0889	18.0773	12.2558	15.474	2.95904	26.4839	25.1627	14.4161	22.0209	6.61903
Delphinidin-3-O-arabinoside	812.011	8.19516	810.373	820.901	804.758	453.879	11.0098	447.151	466.585	447.902	759.65	17.3317	744.282	778.436	756.231	1477.61	66.7817	1543.04	1480.23	1409.55	741.983	22.0847	717.191	749.205	759.552	1366.32	32.4904	1376.99	1392.12	1329.83	343.921	352.812	343.421	346.718	5.28368	704.306	680.942	668.3	684.516	18.267
Delphinidin rutinoside	162.253	8.44286	171.922	156.341	158.495	44.9572	2.75537	42.213	44.935	47.7236	56.0635	12.06	49.503	48.706	69.9816	337.532	1.90817	339.56	335.772	337.264	81.615	4.7969	78.592	87.146	79.107	98.5729	5.90324	91.911	100.654	103.154	46.3785	41.2291	46.4963	44.7013	3.00762	421.202	425.722	408.971	418.631	8.66624
Delphinidin diglucoside	81.1643	8.47736	77.568	75.078	90.847	57.419	4.08743	59.593	59.96	52.704	165.491	4.89924	159.914	167.459	169.101	161.214	7.46291	164.796	152.635	166.21	174.563	29.887	140.219	194.665	188.806	318.013	16.0512	305.448	312.495	336.095	6.46669	5.99363	6.37218	6.2775	0.250336	11.1047	9.71102	7.03474	9.28348	2.06837
Cyanidin-3-O-glucoside	176.313	1.15421	177.009	174.981	176.95	326.976	31.2356	325.556	296.474	358.897	4902.21	28.7815	4882.11	4935.18	4889.34	358.823	23.6148	382.067	359.547	334.854	2137.79	55.6472	2091.08	2122.92	2199.36	9534.52	54.7518	9582.09	9546.81	9474.67	12.8552	5.74095	5.89839	8.16486	4.06275	12.493	12.3666	8.92745	11.2624	2.02307
Cyanidin-3-O-arabinoside	123.326	5.26099	121.799	118.998	129.182	39.1062	3.96789	36.199	37.493	43.6266	1155.3	38.497	1193.79	1155.31	1116.79	255	15.0121	271.23	252.158	241.612	353.522	45.9316	307.242	354.228	399.097	2043.94	21.0601	2021.98	2045.89	2063.97	59.3441	67.9466	57.0338	61.4415	5.75079	488.371	485.233	490.628	488.077	2.70937
Cyanidin-3-5-di-O-glucoside	6.69733	0.198084	6.892	6.704	6.496	13.0916	1.14436	12.735	12.168	14.3718	794.888	5.06668	793.193	790.886	800.585	35.652	3.32134	37.267	31.832	37.857	217.634	4.64955	222.822	213.844	216.235	1536.43	41.7111	1517.64	1507.42	1584.23	5.33082	4.79435	4.69984	4.94167	0.340312	7.91793	6.49803	5.36241	6.59279	1.28039
Malvidin-3-O-glucoside	222.069	2.61689	224.612	219.384	222.211	50.5664	3.42398	52.332	46.62	52.7472	57.0048	7.22685	61.884	60.428	48.7024	453.581	21.1486	434.738	476.455	449.55	187.042	28.0522	207.583	198.462	155.081	104.193	4.74893	101.112	101.806	109.662	31.2181	20.5366	7.65504	19.8033	11.7987	10.5053	8.13854	10.3629	9.6689	1.32724
Malvidin-3-O-arabinoside	55.4563	5.11437	56.254	49.99	60.125	9.3508	0.672194	10.121	9.049	8.8824	7.90273	0.454984	7.408	7.997	8.3032	108.695	6.0905	103.728	115.49	106.866	44.3663	47.8031	99.561	16.227	17.311	16.419	1.32712	15.787	15.526	17.944	10.9499	17.8475	5.36241	11.3866	6.25397	8.51028	9.58759	7.6113	8.56972	0.989483
Malvidin 3-O-p-coumaroylglucoside	4.523	0.0276225	4.494	4.549	4.526	9.5144	0.103189	9.632	9.439	9.4722	18.3515	0.320685	18.636	18.004	18.4146	10.1417	0.27303	10.417	9.871	10.137	30.7793	12.3363	16.566	38.705	37.067	34.7819	0.99937	35.935	34.245	34.1658	5.36192	5.23607	4.82594	5.14131	0.280274	5.17314	5.36241	5.0468	5.19411	0.158849
Petunidin-3-O-glucoside	15.08	1.10929	14.603	16.348	14.289	86.658	1.06052	86.651	85.601	87.722	71.0428	5.08245	74.542	65.213	73.3734	113.344	0.865482	112.496	113.311	114.226	175.324	11.7188	188.125	165.125	172.721	137.987	9.84714	145.922	141.073	126.967	7.27042	6.5612	6.49803	6.77655	0.428868	29.9394	30.349	23.2824	27.8569	3.96698
Petunidin-3-O-arabinoside	4.23633	0.417689	4.017	4.718	3.974	38.9148	3.25691	36.979	42.675	37.0904	66.6376	2.96169	63.302	67.652	68.9588	29.6097	2.27946	30.155	31.567	27.107	63.079	13.905	79.045	53.625	56.567	161.362	12.8888	150.651	157.768	175.666	n.q	n.q	n.q	n.q		n.q	n.q	n.q	n.q
Peonidin-3-O-glucoside	18.2023	0.50412	18.731	17.727	18.149	258.644	19.0041	252.135	243.75	280.048	180.736	16.8476	172.245	169.824	200.14	95.3753	6.4541	88.047	97.866	100.213	347.61	19.9024	325.368	363.738	353.725	382.359	17.2734	391.43	362.44	393.208	n.q	n.q	n.q	n.q		n.q	n.q	n.q	n.q
Pelargonidin-3-O-glucoside	67.1897	1.76979	67.906	65.174	68.489	141.22	6.17945	147.777	140.378	135.504	149.216	15.8696	155.199	161.225	131.225	159.884	7.6227	151.465	161.871	166.317	315.42	18.8646	314.781	296.883	334.596	347.049	28.0046	329.038	379.313	332.796	11.1042	6.5612	5.45692	7.70744	2.99304	8.42281	9.02196	7.91793	8.45423	0.552689
Catechins
Catechin	3089.11	16.6912	3107.09	3074.11	3086.13	1564.97	24.7242	1540.59	1564.29	1590.03	37339.2	34.1019	37374.6	37336.4	37306.6	5732.98	25.6512	5735.07	5706.34	5757.52	2604.37	70.0159	2682.38	2546.99	2583.72	42354.7	76.4008	42433.1	42280.4	42350.5	3602.67	3699.2	3635.66	3645.84	49.0641	2620.8	2583.26	2640.35	2614.8	29.0106
Procyanidin B1	316.884	2.89199	319.199	313.642	317.81	75.1824	2.61913	73.146	78.137	74.2642	432.034	17.6469	432.006	414.401	449.695	472.083	12.2141	486.181	464.678	465.391	242.831	31.7375	206.397	264.467	257.629	745.586	27.44	721.472	775.443	739.843	60.4228	63.4038	62.3044	62.0437	1.50749	73.1353	48.9725	61.9514	61.3531	12.0925
Procyanidin C	11.3843	0.840896	10.415	11.82	11.918	23.0212	3.45593	25.267	24.755	19.0416	33.2226	3.8621	29.643	32.709	37.3158	41.8293	3.98516	39.947	39.134	46.407	51.548	1.89668	49.53	51.82	53.294	56.7927	4.82273	59.543	59.611	51.224	4.63848	2.85412	4.50106	3.99789	0.992908	46.5053	31.9577	27.2875	35.2502	10.023
Procyanidin tetramer	10.8807	0.756207	10.16	11.668	10.814	50.9818	4.64716	52.529	54.658	45.7584	82.4483	4.4824	77.964	82.452	86.9288	85.5823	5.50417	79.289	89.498	87.96	90.086	5.07329	95.716	88.673	85.869	152.884	7.93214	149.362	147.322	161.967	0.5	2.30444	0.5	1.10148	1.04179	2.99154	3.95349	9.16913	5.37139	3.32393
Procyanidin pentamer	0	0	0	0	0	0	0	0	0	0	0	0	0	0	0	0	0	0	0	0	0	0	0	0	0	0	0	0	0	0	1.75476	0.5	0.5	0.918252	0.724434	4.49894	0.5	2.30444	2.43446	2.00264
Catechin-3-gallate	105.351	7.3821	98.357	113.068	104.628	190.588	6.42855	183.356	195.654	192.753	114.049	8.51161	110.805	107.637	123.706	139.1	3.91765	134.577	141.431	141.292	127.661	6.88963	133.897	120.265	128.821	117.475	20.9365	129.024	130.093	93.3072	13.8783	9.23301	9.74504	10.9521	2.54706	57.5105	60.5912	60.0664	59.3893	1.64818
Gallocatechin	165.826	5.26381	161.086	164.901	171.491	241.156	11.871	229.223	252.964	241.282	474.191	17.7473	483.902	453.707	484.963	179.281	4.65039	183.728	179.665	174.451	287.642	37.9335	243.84	309.428	309.657	213.697	20.2866	220.127	229.99	190.975	923.225	916.004	912.068	917.099	5.6587	765.203	763.449	731.76	753.471	18.8221
EC-3-gallate	145.233	8.91175	144.915	154.299	136.484	180.146	13.2647	176.71	168.937	194.79	115.616	7.84326	112.504	124.538	109.807	142.053	6.89047	139.503	136.801	149.855	175.649	11.4338	188.851	169.187	168.91	122.414	11.376	117.175	135.465	114.601	13.8783	9.23301	9.74504	10.9521	2.54706	77.5105	89.1133	70.0664	78.8967	9.5988
EGC 3-gallate	114.515	3.38452	118.356	111.97	113.219	96.803	6.43079	103.198	90.337	96.874	70.3488	4.96451	75.734	69.358	65.9544	130.576	6.51379	132.345	123.36	136.022	125.631	29.1275	157.967	117.477	101.45	128.409	12.1845	119.398	123.558	142.272	134.41	125.504	120.185	126.7	7.18744	12.5008	16.5261	10.0203	13.0157	3.28332
GC 3-gallate	116.474	12.2123	110.373	108.515	130.535	156.574	3.38284	152.902	159.564	157.255	63.0436	14.3922	55.845	53.671	79.6148	251.976	11.2183	239.027	258.764	258.136	120.944	25.9465	150.844	104.342	107.647	129.453	6.71175	121.983	134.976	131.4	13.3666	9.62711	10.3159	11.1032	1.99017	12.5599	16.5261	9.9615	13.0158	3.30597
EGC-epicatechin dimer	23.948	0.444285	24.201	24.208	23.435	23.6116	1.49369	23.54	22.155	25.1398	71.9345	6.38214	68.804	67.722	79.2774	42.2467	2.67277	40.505	45.324	40.911	37.382	5.13936	43.316	34.354	34.476	179.023	4.11281	181.719	181.06	174.289	58.6021	67.9737	62.0869	62.8876	4.7368	115.959	102.61	106.279	108.283	6.89644
EGC digallate	7.01667	0.490157	6.454	7.351	7.245	10.98	0.863627	10.774	11.928	10.238	55.202	2.44227	52.923	57.78	54.903	19.1677	1.33191	18.95	20.595	17.958	35.751	3.1491	32.251	36.647	38.355	90.7857	6.0025	91.696	84.38	96.281	11.3588	8.99715	7.93397	9.42996	1.75294	35.4326	20.3353	12.5793	22.7824	11.6215
EGC gallate glucoside	27.3327	1.33241	26.12	27.119	28.759	37.8556	2.83517	39.884	34.616	39.0668	32.7476	7.67118	38.092	36.193	23.9578	12.8217	0.367141	12.43	12.877	13.158	32.3967	3.39551	35.645	28.871	32.674	29.2002	2.93858	28.22	26.877	32.5036	10.6503	9.46947	7.89456	9.3381	1.38255	12.7566	11.9105	11.989	12.2187	0.467491
EGC-EGC gallate	0	0	0	0	0	0	0	0	0	0	0	0	0	0	0	0	0	0	0	0	0	0	0	0	0	0	0	0	0	0	7.22549	7.42254	3	5.88268	2.49842	7.30431	7.26429	7.57928	7.38263	0.171474
Polyphenols
Flavone+Na	296.468	15.6024	294.329	313.03	282.046	413.539	20.8286	398.727	404.536	437.355	158.638	15.0418	151.529	148.468	175.916	146.811	10.4162	153.849	134.845	151.738	258.252	30.5533	225.639	262.904	286.212	79.5796	4.5137	75.451	78.889	84.3988	25.7064	13.924	6.35274	15.3277	9.75291	5.52034	5.67778	5.47223	5.55678	0.107512
Apigenin	637.566	6.31144	644.781	634.846	633.07	966.305	10.7127	957.427	978.204	963.285	783.732	32.1507	752.81	781.402	816.985	420.575	22.6462	394.603	436.194	430.929	413.384	57.069	479.281	380.68	380.191	426.798	20.9715	451.008	414.236	415.15	24.0076	18.4797	6.52694	16.3381	8.93495	7.03474	14.3949	6.11949	9.18305	4.53675
Daidzein	194.623	15.4629	201.892	205.112	176.865	266.248	15.6875	274.161	248.18	276.403	38.2249	6.40702	42.622	41.179	30.8738	382.525	27.975	387.34	407.78	352.455	357.09	15.19	349.023	374.612	347.636	292.319	33.4603	265.532	281.599	329.825	9.36892	7.76	6.49803	7.87565	1.43893	7.38097	9.19083	8.20171	8.25784	0.906232
Eriodictyol	299.485	33.3004	276.521	337.677	284.258	1306.79	17.6206	1294.02	1299.46	1326.89	1823.4	38.5485	1806.85	1867.46	1795.89	1024.41	38.1038	1039.82	981.018	1052.4	1306.33	54.839	1369.49	1270.87	1278.63	1705.9	183.876	1593.77	1918.1	1605.82	78.0992	58.9272	59.4787	65.5017	10.9132	36.1037	31.9896	22.2243	30.1058	7.12889
Quercetin	4495.07	7.19339	4501.66	4496.14	4487.4	2253.1	26.8421	2277.67	2257.17	2224.45	4636.6	35.5612	4676.62	4624.57	4608.62	2819.72	52.544	2783.23	2879.95	2795.99	3300.54	41.8706	3253.24	3315.52	3332.86	4704.42	112.772	4574.68	4759.66	4778.93	101.837	104.916	107.611	104.788	2.88904	167.996	167.234	162.402	165.877	3.03357
Quercetin-3-glucoside	1934.26	17.9545	1925.83	1922.08	1954.88	767.173	55.2058	808.278	788.816	704.425	891.195	22.5287	906.091	902.217	865.278	857.709	41.5001	820.443	850.252	902.432	733.529	79.0859	808.046	741.987	650.554	690.932	41	709.602	643.92	719.275	140.598	158.777	162.92	154.098	11.8738	1284.88	1352.24	1334.85	1323.99	34.9714
Sinensetin	318.649	16.3857	334.815	302.052	319.079	107.335	13.0164	116.433	113.146	92.4248	65.0045	6.58934	68.391	69.212	57.4106	0	0	0	0	0	128.632	7.9806	137.828	123.519	124.549	134.833	22.2838	115.561	129.704	159.234	6.58574	8.69396	5.96618	7.08196	1.42999	4.54215	4.54215	4.54215	4.54215	0
Naringin	241.166	18.6708	262.034	226.043	235.42	223.259	15.0708	221.693	209.033	239.052	255.189	23.2504	234.809	250.244	280.514	274.39	19.2127	263.815	262.788	296.567	353.594	14.0918	340.346	368.4	352.035	294.528	21.6823	304.973	309.011	269.6	33.7071	32.2461	38.3421	34.7651	3.18276	10.1739	17.4228	6.309	11.3019	5.64209
Naringenin	310.557	6.26234	306.978	306.905	317.788	931.676	18.296	927.553	915.794	951.682	468.609	16.993	449.677	482.542	473.607	484.49	18.7638	498.815	491.405	463.25	744.81	46.9886	724.719	711.207	798.504	513.604	45.4587	522.883	553.708	464.222	30.3087	29.0409	30.0167	29.7888	0.663914	20.4873	16.7303	12.2063	16.4746	4.14642
Myricetin	16.6413	0.708922	17.135	15.829	16.96	16.5266	0.897852	16.102	17.558	15.9198	10.2259	1.1543	9.558	9.561	11.5588	32.6507	1.80463	34.491	30.884	32.577	27.2603	0.378536	26.903	27.657	27.221	23.4811	3.71444	21.077	21.607	27.7592	n.q	n.q	n.q	n.q		n.q	n.q	n.q	n.q
Myricitrin	417.664	13.5637	427.895	422.819	402.279	672.058	32.282	669.603	641.073	705.497	838.55	40.8786	885.752	814.828	815.069	443.93	22.936	469.442	437.333	425.016	1195.75	89.7338	1288.38	1109.22	1189.66	907.661	48.046	879.545	880.299	963.138	n.q	n.q	n.q	n.q		n.q	n.q	n.q	n.q
Kaempferol	281.648	14.5893	288.374	291.661	264.909	390.255	49.4903	422.437	415.061	333.268	161.12	13.7137	162.007	146.985	174.369	311.858	20.3664	288.492	325.844	321.239	193.278	22.1755	207.831	167.756	204.248	167.429	13.5565	181.339	154.256	166.692	n.q	n.q	n.q	n.q		n.q	n.q	n.q	n.q
Phloridzin	789.133	8.01086	779.928	794.526	792.945	1215.95	30.1034	1232.63	1234.03	1181.2	1401.28	90.573	1444.24	1297.22	1462.38	698.164	37.8009	695.933	661.528	737.031	1176.45	24.07	1198.1	1150.53	1180.71	1095.52	78.0811	1041.08	1184.98	1060.51	158.122	151.81	171.913	160.615	10.2807	16.4052	16.9101	13.8653	15.7269	1.63184
Phloretin	176.491	6.67809	173.735	184.106	171.632	185.157	3.23901	184.658	188.616	182.196	146.822	21.3179	164.564	152.728	123.174	182.316	14.5791	191.979	189.422	165.546	80.6097	16.6166	62.115	85.433	94.281	86.9589	11.9305	81.559	78.683	100.635	43.7277	53.5057	47.7289	48.3208	4.91576	8.35964	20.4278	32.7005	20.496	12.1706
Rutin	144.524	12.9278	137.634	136.5	159.437	39.528	3.47686	40.115	35.795	42.674	56.2044	2.97145	52.823	57.391	58.3992	75.8307	4.69183	72.788	81.234	73.47	20.9707	1.35207	21.17	22.212	19.53	29.8695	1.684	28.323	29.622	31.6636	34.0907	33.0817	30.4917	32.5547	1.8565	421.171	399.391	433.532	418.031	17.2861
6-Malonyldaidzin	98.4717	5.26593	104.552	95.478	95.385	153.893	12.5832	139.671	158.43	163.579	109.591	6.82701	102.462	110.242	116.069	53.3147	0.351399	52.942	53.362	53.64	73.983	7.51431	82.6	68.794	70.555	58.4637	0.658069	59.104	58.498	57.7892	9.14831	9.5905	5.59906	8.11262	2.18801	6.97157	6.34059	6.4351	6.58242	0.340312
Phenolic acids and caffeine
Gallic acid	11960	45.5614	11962.3	11913.3	12004.4	9339.06	10.123	9328.94	9349.18	9339.07	3412.32	6.63314	3418.97	3412.29	3405.7	217.506	6.50348	224.221	217.06	211.237	565.743	28.8836	595.545	537.875	563.81	460.455	43.017	472.168	496.402	412.794	487.789	451.504	464.852	468.048	18.3522	459.579	439.693	442.506	447.259	10.7618
Syringic acid	2196.21	16.2631	2179.19	2197.87	2211.59	2129.88	26.6087	2105.6	2158.32	2125.73	718.077	29.1716	702.694	699.817	751.721	765.366	27.5795	761.029	740.212	794.857	625.356	14.4894	617.52	616.472	642.076	801.319	69.5169	849.256	833.111	721.591	173.139	166.737	153.65	164.509	9.93415	165.333	166.912	158.496	163.58	4.47362
Chlorogenic acid	270.693	10.9162	283.194	263.045	265.839	822.945	18.3573	803.598	840.119	825.119	409.112	28.8745	384.732	401.605	440.998	340.627	26.9846	371.647	327.668	322.567	577.738	41.9381	612.096	531.005	590.114	587.821	22.9532	604.733	597.037	561.692	167.679	174.25	186.818	176.249	9.72482	189.734	179.474	184.895	184.701	5.13266
Caffeic acid	226.123	6.65356	226.556	232.55	219.264	195.476	20.2148	191.259	177.703	217.467	169.207	19.9902	174.178	186.242	147.2	303.733	3.43075	307.656	302.246	301.296	124.819	30.3061	159.633	104.34	110.483	153.273	19.4983	157.091	132.148	170.58	222.606	212.638	197.895	211.046	12.4325	241.294	263.302	243.822	249.473	12.043
Quinic acid	1168.47	34.6573	1207.73	1142.13	1155.55	2748.38	47.2524	2801.05	2734.38	2709.71	1106.42	10.5064	1094.75	1115.12	1109.4	2282.99	176.101	2409.16	2358.01	2081.8	4793.55	27.949	4809.76	4809.61	4761.28	3348.62	77.6686	3402.96	3259.66	3383.25	n.q	n.q	n.q	n.q		n.q	n.q	n.q	n.q
Ferulic acid	1822.23	20.9968	1844.85	1803.36	1818.48	2411.39	41.3508	2448.99	2418.08	2367.1	819.623	28.936	806.129	799.898	852.841	4104.09	94.3402	4074.87	4027.82	4209.58	4501.72	97.9984	4507.9	4400.77	4596.48	3869.21	57.9283	3936.03	3833.16	3838.43	190.583	165.684	170.964	175.744	13.1199	195.741	174.935	199.937	190.204	13.3888
Coumaric acid	132.3	9.56884	127.397	143.327	126.177	49	1.45677	47.834	50.633	48.533	0	0	0	0	0	193.84	14.5754	189.154	182.184	210.182	86.9603	25.261	116.129	72.28	72.472	11.4863	1.01221	10.917	10.887	12.655	221.633	214.002	191.542	209.059	15.6426	248.346	251.718	258.756	252.94	5.31166
Vanillic acid	573.032	36.7884	569.226	538.294	611.575	364.519	25.5806	383.745	374.326	335.486	201.874	0.61565	202.101	201.177	202.344	578.927	26.5367	561.437	609.461	565.882	384.638	24.8478	360.456	410.102	383.357	383.032	15.3514	383.825	367.3	397.972	998.982	988.976	1152.63	1046.86	91.7337	254.639	262.121	227.833	248.197	18.0289
Coumaroylquinic acid	171.643	7.04756	173.491	163.856	177.583	193.09	15.4358	183.82	184.542	210.909	225.303	14.3515	217.037	216.998	241.875	171.064	7.96205	169.464	179.705	164.024	282.771	5.62621	288.754	281.972	277.587	202.601	9.96411	201.382	213.119	193.303	n.q	n.q	n.q	n.q		n.q	n.q	n.q	n.q
Feruloylquinic acid	230.127	3.64699	227.502	234.291	228.587	177.255	7.77444	168.914	178.551	184.3	145.587	15.615	154.111	155.084	127.565	206.992	22.1253	232.518	193.308	195.15	170.68	7.4119	177.354	171.983	162.703	174.823	23.4472	175.216	198.071	151.182	144.534	149.148	145.09	146.257	2.51905	149.626	145.886	146.124	147.212	2.09365
Valoneic acid dilactone	19.017	1.8703	19.947	16.864	20.24	23.6016	2.83312	22.398	21.569	26.8378	14.1241	0.948748	15.16	13.915	13.2974	17.683	1.15356	16.457	17.845	18.747	35.998	13.2541	20.93	45.853	41.211	16.1293	2.09375	14.504	15.392	18.492	n.q	n.q	n.q	n.q		n.q	n.q	n.q	n.q
Caffeine	0	0	0	0	0	0	0	0	0	0	0	0	0	0	0	0	0	0	0	0	0	0	0	0	0	0	0	0	0	0	n.q	n.q	n.q	n.q		n.q	n.q	n.q	n.q
Syringaldehyde	0	0	0	0	0	0	0	0	0	0	0	0	0	0	0	0	0	0	0	0	0	0	0	0	0	0	0	0	0	0	286.123	306.544	284.511	292.393	12.2821	198.643	195.683	183.753	192.693	7.88262
n.q.= not quantifiable; Fruit: CG= Campania Green, CV= Campania Veraison, CR= Campania Red, SG= Sicilia Green, SV= Sicilia Veraison, SR=Sicilia Red Leaves: CL= Campania, SL= Sicilia Leaf
