# Supplementary material for: Multi-omic characterisation as a tool to improve knowledge, valorisation and conservation of wild fruit genetic resources: the case of Arbutus unedo L
Source: Front Plant Sci. 2023 Sep 8;14:1195673. doi: 10.3389/fpls.2023.1195673 (PMC10514896; doi:10.3389/fpls.2023.1195673)
Supplement: Supplementary file 3 [file Table_3.xlsx]

## Sheet: Foglio1
Supplementary File 4. Amino acids identified in A. unedo fruit from Campania and Sicilia region at different ripening stages by LC-MS analysis (expressed as percentage, %)
Amino acid	AVE-CG	SD	CG Rep1	CG Rep2	CG Rep3	AVE-CV	SD	CV Rep1	CV Rep2	CV Rep3	AVE-CR	SD	CR Rep1	CR Rep2	CR Rep3	AVE-SG	SD	SG Rep1	SG Rep2	SG Rep3	AVE-SV	SD	SV Rep1	SV Rep2	SV Rep3	AVE-SR	SD	SR Rep1	SR Rep2	SR Rep3
Alanine	1.34167	0.0362537	1.366	1.3	1.359	1.11	0.00818535	1.112	1.101	1.117	0.575667	0.0120554	0.563	0.587	0.577	1.17367	0.0211266	1.198	1.16	1.163	0	0	0	0	0	0.991667	0.0207445	1.014	0.973	0.988
Valine*	0.563	0.0222711	0.567	0.539	0.583	3.407	0.1403	3.325	3.569	3.327	5.71633	0.348649	5.55	5.482	6.117	2.60767	0.0431548	2.573	2.656	2.594	3.175	0.144655	3.28	3.01	3.235	7.951	0.133	7.808	8.071	7.974
Leucine*	1.134	0.0774855	1.192	1.046	1.164	5.433	0.520458	5.55	5.885	4.864	4.755	0.148624	4.9	4.762	4.603	5.225	0.282643	4.932	5.496	5.247	6.079	0.665946	6.601	6.307	5.329	6.10467	0.0760548	6.017	6.153	6.144
Isoleucine*	7.68833	0.088636	7.738	7.741	7.586	3.927	0.158502	3.86	4.108	3.813	10.105	0.361659	10.522	9.877	9.916	5.77933	0.0144338	5.771	5.771	5.796	4.582	0.331475	4.302	4.496	4.948	9.69767	0.0652559	9.636	9.691	9.766
Tryptofano*	57.891	2.97642	61.017	57.565	55.091	4.832	0.259289	4.883	4.551	5.062	8.72867	0.228955	8.983	8.664	8.539	41.641	2.41416	39.031	42.098	43.794	7.075	1.04305	6.524	6.423	8.278	9.99267	0.250588	9.922	9.785	10.271
Tyrosine	4.653	0.223551	4.863	4.678	4.418	11.365	1.30158	10.66	10.568	12.867	13.8217	1.20102	12.482	14.802	14.181	5.377	0.0407063	5.353	5.424	5.354	11.71	1.02804	12.704	11.775	10.651	14.9913	1.00096	15.265	15.827	13.882
Phenylalanine*	0.151333	0.0107858	0.159	0.156	0.139	3.305	0.0406325	3.294	3.35	3.271	8.867	0.608187	8.179	9.089	9.333	1.09267	0.110654	1.005	1.056	1.217	4.232	0.323529	4.558	4.227	3.911	8.04067	0.114788	7.981	7.968	8.173
Aspartic acid	2.454	0.0831625	2.448	2.54	2.374	8.55	0.260799	8.27	8.594	8.786	3.072	0.263279	2.816	3.058	3.342	5.86667	0.0653784	5.796	5.879	5.925	6.925	0.707797	7.533	7.094	6.148	3.648	0.206233	3.456	3.866	3.622
Asparagine	6.869	0.176128	6.904	7.025	6.678	8.326	0.606515	8.657	8.695	7.626	3.20633	0.158245	3.119	3.389	3.111	12.4067	0.606066	11.771	12.978	12.471	8.141	0.438597	8.003	7.788	8.632	3.485	0.230539	3.343	3.751	3.361
Glutamine	0.0666667	0.0051316	0.071	0.068	0.061	1.616	0.10843	1.569	1.74	1.539	1.10967	0.0889625	1.007	1.164	1.158	0.0913333	0.0051316	0.097	0.087	0.09	1.35	0.109302	1.228	1.439	1.383	1.50867	0.116316	1.428	1.456	1.642
Glutamic acid	0.772333	0.0411015	0.793	0.725	0.799	9.446	1.21862	8.694	8.792	10.852	11.0093	0.179224	10.812	11.054	11.162	1.12867	0.0365285	1.127	1.166	1.093	7.516	0.336929	7.705	7.127	7.716	9.40033	0.638888	8.735	10.009	9.457
Arginine	0.0376667	0.0023094	0.035	0.039	0.039	1.333	0.0812219	1.24	1.369	1.39	0.376333	0.0205508	0.366	0.4	0.363	0.058	0.00458258	0.062	0.059	0.053	1.098	0.074505	1.012	1.139	1.143	0.669333	0.0271539	0.686	0.684	0.638
Lysine*	0.122	0.00916515	0.124	0.13	0.112	1.908	0.0924067	1.811	1.995	1.918	2.038	0.199489	1.808	2.164	2.142	0.194667	0.0117189	0.186	0.208	0.19	1.858	0.166433	1.788	1.738	2.048	1.26867	0.0557704	1.239	1.234	1.333
Histidine*	0.0553333	0.00152753	0.057	0.054	0.055	2.732	0.0709295	2.723	2.807	2.666	0.862667	0.0463717	0.873	0.812	0.903	0.386667	0.0207445	0.383	0.368	0.409	2.634	0.163166	2.617	2.48	2.805	1.01333	0.0601775	0.956	1.008	1.076
Serine	0.588	0.0277128	0.556	0.604	0.604	2.93	0.0861568	2.971	2.831	2.988	1.67667	0.0120968	1.686	1.663	1.681	0.874333	0.0808229	0.866	0.959	0.798	3.21	0.289377	3.143	3.527	2.96	1.56	0.0314325	1.582	1.524	1.574
Threnonine*	14.214	0.874192	14.099	13.403	15.14	28.133	2.46293	26.375	27.076	30.948	23.36	2.05584	21.958	25.72	22.402	15.3187	0.76337	14.447	15.641	15.868	29.15	3.62833	31.995	30.391	25.064	19.7427	0.45543	19.222	20.067	19.939
Cysteine	n.q					n.q					n.q					n.q					n.q					n.q
Methionine*	0.152333	0.0125831	0.139	0.164	0.154	1.645	0.149623	1.807	1.616	1.512	1.47867	0.0537246	1.539	1.436	1.461	0.224667	0.017673	0.213	0.216	0.245	1.261	0.0851587	1.343	1.173	1.267	1.07633	0.0575702	1.024	1.138	1.067
n.q.= not quantifiable; *=essential amino acids; CG= Campania green, CV= Campania veraison, CR= Campania red, SG= Sicilia green, SV= Sicilia veraison, SR=Sicilia red
