# Supplementary material for: Multi-omic characterisation as a tool to improve knowledge, valorisation and conservation of wild fruit genetic resources: the case of Arbutus unedo L
Source: Front Plant Sci. 2023 Sep 8;14:1195673. doi: 10.3389/fpls.2023.1195673 (PMC10514896; doi:10.3389/fpls.2023.1195673)
Supplement: Supplementary file 4 [file Table_4.xlsx]

## Sheet: A.unedo fruits total proteins
Supplementary File 1: 304 protein dataset		log₂ LFQ intenisty
Protein IDs	Fasta headers	CG	SG	CV	SV	CR	SR	Mol. weight [kDa]	Score
tr|A0A6A4KS07|A0A6A4KS07_9ERIC;tr|A0A834LQY4|A0A834LQY4_RHOSS;tr|A0A834LMD9|A0A834LMD9_RHOSS	tr|A0A6A4KS07|A0A6A4KS07_9ERIC Adenosine kinase (Fragment) OS=Rhododendron williamsianum OX=262921 GN=C3L33_20155 PE=3 SV=1;tr|A0A834LQY4|A0A834LQY4_RHOSS Adenosine kinase OS=Rhododendron simsii OX=118357 GN=RHSIM_Rhsim05G0179500 PE=3 SV=1	26.9978	26.8667	NaN	28.1427	28.0671	27.8761	41.72	323.31
tr|A0A834GED3|A0A834GED3_RHOSS;tr|A0A6A4KUM5|A0A6A4KUM5_9ERIC;tr|A0A834G2B8|A0A834G2B8_RHOSS;tr|A0A6A4L855|A0A6A4L855_9ERIC;tr|A0A834GJB5|A0A834GJB5_RHOSS	tr|A0A834GED3|A0A834GED3_RHOSS UDP-glucose 6-dehydrogenase OS=Rhododendron simsii OX=118357 GN=RHSIM_Rhsim10G0044100 PE=3 SV=1;tr|A0A6A4KUM5|A0A6A4KUM5_9ERIC UDP-glucose 6-dehydrogenase (Fragment) OS=Rhododendron williamsianum OX=262921 GN=C3L33_18764 PE=3	25.2896	24.9835	25.9063	25.8192	25.3442	25.6922	53.026	323.31
tr|A0A834GAK6|A0A834GAK6_RHOSS;tr|A0A6A4KX31|A0A6A4KX31_9ERIC;tr|A0A6A4KSD0|A0A6A4KSD0_9ERIC;tr|A0A834HA53|A0A834HA53_RHOSS	tr|A0A834GAK6|A0A834GAK6_RHOSS PCI domain-containing protein OS=Rhododendron simsii OX=118357 GN=RHSIM_Rhsim11G0192900 PE=3 SV=1;tr|A0A6A4KX31|A0A6A4KX31_9ERIC PCI domain-containing protein (Fragment) OS=Rhododendron williamsianum OX=262921 GN=C3L33_20708	23.8196	23.1547	23.7159	24.2166	24.2075	23.054	57.04	323.31
tr|A0A6A4KXS2|A0A6A4KXS2_9ERIC;tr|A0A6A4MFG7|A0A6A4MFG7_9ERIC;tr|A0A834LWL8|A0A834LWL8_RHOSS;tr|A0A834GFN7|A0A834GFN7_RHOSS	tr|A0A6A4KXS2|A0A6A4KXS2_9ERIC Alpha-galactosidase (Fragment) OS=Rhododendron williamsianum OX=262921 GN=C3L33_20443 PE=3 SV=1	28.2537	28.2253	28.7086	28.2998	28.5905	28.7244	37.215	323.31
tr|A0A6A4L4F0|A0A6A4L4F0_9ERIC;tr|A0A834LU30|A0A834LU30_RHOSS;tr|A0A2Z5U6P2|A0A2Z5U6P2_KALPR	tr|A0A6A4L4F0|A0A6A4L4F0_9ERIC Epimerase domain-containing protein (Fragment) OS=Rhododendron williamsianum OX=262921 GN=C3L33_15021 PE=4 SV=1;tr|A0A834LU30|A0A834LU30_RHOSS Epimerase domain-containing protein OS=Rhododendron simsii OX=118357 GN=RHSIM_Rhsi	26.3027	26.7787	25.5076	27.8162	27.3296	27.7723	42.606	323.31
tr|A0A6A4L8V2|A0A6A4L8V2_9ERIC	tr|A0A6A4L8V2|A0A6A4L8V2_9ERIC Uncharacterized protein (Fragment) OS=Rhododendron williamsianum OX=262921 GN=C3L33_15860 PE=4 SV=1	28.2024	27.8415	28.4163	28.7076	28.2943	28.6377	35.778	323.31
tr|A0A6A4L930|A0A6A4L930_9ERIC;tr|X5I326|X5I326_9ERIC;tr|Q8L6D2|Q8L6D2_RHOSS;tr|A0A2Z5QL08|A0A2Z5QL08_RHODA;tr|A0A834FUH5|A0A834FUH5_RHOSS;tr|A0A834FV40|A0A834FV40_RHOSS;tr|A0A4Y6JLW5|A0A4Y6JLW5_9ERIC;tr|A0A834LV68|A0A834LV68_RHOSS;tr|H6UKR4|H6UKR4_VACCO;tr|A0A4Y6JM43|A0A4Y6JM43_9ERIC;tr|A0A6A4KYP5|A0A6A4KYP5_9ERIC;tr|X5IG77|X5IG77_9ERIC;tr|A0A068PWE3|A0A068PWE3_CASLY;tr|A0A068PXK4|A0A068PXK4_9ER…	tr|A0A6A4L930|A0A6A4L930_9ERIC Uncharacterized protein (Fragment) OS=Rhododendron williamsianum OX=262921 GN=C3L33_15158 PE=3 SV=1;tr|X5I326|X5I326_9ERIC Chalcone synthase OS=Vaccinium ashei OX=945837 GN=CHS2 PE=2 SV=1;tr|Q8L6D2|Q8L6D2_RHOSS Chalcone synth	NaN	NaN	NaN	NaN	28.1831	27.4502	44.751	323.31
tr|A0A6A4LBG3|A0A6A4LBG3_9ERIC;tr|A0A834G2F1|A0A834G2F1_RHOSS	tr|A0A6A4LBG3|A0A6A4LBG3_9ERIC Glyceraldehyde-3-phosphate dehydrogenase (Fragment) OS=Rhododendron williamsianum OX=262921 GN=C3L33_13280 PE=3 SV=1;tr|A0A834G2F1|A0A834G2F1_RHOSS Glyceraldehyde-3-phosphate dehydrogenase OS=Rhododendron simsii OX=118357 GN=	27.4749	26.885	26.8287	25.753	25.873	26.1127	40.963	323.31
tr|A0A6A4LE63|A0A6A4LE63_9ERIC;tr|A0A834L389|A0A834L389_RHOSS;tr|A0A6A4LUX3|A0A6A4LUX3_9ERIC;tr|A0A6A4KK97|A0A6A4KK97_9ERIC;tr|A0A6A4LV75|A0A6A4LV75_9ERIC	tr|A0A6A4LE63|A0A6A4LE63_9ERIC Uncharacterized protein (Fragment) OS=Rhododendron williamsianum OX=262921 GN=C3L33_11578 PE=3 SV=1;tr|A0A834L389|A0A834L389_RHOSS Uncharacterized protein OS=Rhododendron simsii OX=118357 GN=RHSIM_RhsimUnG0250200 PE=3 SV=1	27.8908	27.2586	27.3398	26.8758	27.3157	NaN	112.5	323.31
tr|A0A834GRS0|A0A834GRS0_RHOSS;tr|A0A6A4LKS3|A0A6A4LKS3_9ERIC	tr|A0A834GRS0|A0A834GRS0_RHOSS Uncharacterized protein OS=Rhododendron simsii OX=118357 GN=RHSIM_Rhsim06G0162500 PE=3 SV=1;tr|A0A6A4LKS3|A0A6A4LKS3_9ERIC Uncharacterized protein (Fragment) OS=Rhododendron williamsianum OX=262921 GN=C3L33_10185 PE=3 SV=1	25.4625	NaN	25.3737	NaN	NaN	NaN	111.69	323.31
tr|A0A6A4LQC1|A0A6A4LQC1_9ERIC;tr|A0A6A4LR70|A0A6A4LR70_9ERIC;tr|A0A6A4L4Q2|A0A6A4L4Q2_9ERIC;tr|A0A6A4L1X2|A0A6A4L1X2_9ERIC;tr|A0A834GX81|A0A834GX81_RHOSS;tr|A0A834G9H8|A0A834G9H8_RHOSS;tr|A0A834GE04|A0A834GE04_RHOSS	tr|A0A6A4LQC1|A0A6A4LQC1_9ERIC Catalase (Fragment) OS=Rhododendron williamsianum OX=262921 GN=C3L33_09406 PE=3 SV=1;tr|A0A6A4LR70|A0A6A4LR70_9ERIC Catalase (Fragment) OS=Rhododendron williamsianum OX=262921 GN=C3L33_11250 PE=3 SV=1;tr|A0A6A4L4Q2|A0A6A4L4Q2	25.3632	25.2104	NaN	25.3727	26.4395	26.2473	53.439	323.31
tr|A0A6A4LQJ5|A0A6A4LQJ5_9ERIC;tr|A0A834GWU3|A0A834GWU3_RHOSS	tr|A0A6A4LQJ5|A0A6A4LQJ5_9ERIC Tr-type G domain-containing protein (Fragment) OS=Rhododendron williamsianum OX=262921 GN=C3L33_09667 PE=3 SV=1;tr|A0A834GWU3|A0A834GWU3_RHOSS Uncharacterized protein OS=Rhododendron simsii OX=118357 GN=RHSIM_Rhsim06G0239600	27.9383	28.2355	27.792	28.4662	27.8631	27.3554	93.654	323.31
tr|A0A6A4M0Y7|A0A6A4M0Y7_9ERIC	tr|A0A6A4M0Y7|A0A6A4M0Y7_9ERIC Lipoxygenase (Fragment) OS=Rhododendron williamsianum OX=262921 GN=C3L33_05810 PE=3 SV=1	27.8984	28.1746	26.445	26.8987	25.3158	26.0788	58.014	323.31
tr|A0A6A4M2P9|A0A6A4M2P9_9ERIC;tr|A0A834G4H8|A0A834G4H8_RHOSS;tr|A0A6A4LG01|A0A6A4LG01_9ERIC;tr|A0A834LSW9|A0A834LSW9_RHOSS;tr|A0A834FUP7|A0A834FUP7_RHOSS	tr|A0A6A4M2P9|A0A6A4M2P9_9ERIC 40S ribosomal protein S8 (Fragment) OS=Rhododendron williamsianum OX=262921 GN=C3L33_07250 PE=3 SV=1;tr|A0A834G4H8|A0A834G4H8_RHOSS 40S ribosomal protein S8 OS=Rhododendron simsii OX=118357 GN=RHSIM_Rhsim13G0050700 PE=3 SV=1	25.5512	25.6751	26.3099	25.5295	25.8556	26.4586	30.75	323.31
tr|A0A6A4M3B6|A0A6A4M3B6_9ERIC;tr|A0A834G455|A0A834G455_RHOSS;tr|A0A834LIA3|A0A834LIA3_RHOSS;tr|A0A6A4MCH3|A0A6A4MCH3_9ERIC	tr|A0A6A4M3B6|A0A6A4M3B6_9ERIC Uncharacterized protein (Fragment) OS=Rhododendron williamsianum OX=262921 GN=C3L33_06831 PE=4 SV=1;tr|A0A834G455|A0A834G455_RHOSS Uncharacterized protein OS=Rhododendron simsii OX=118357 GN=RHSIM_Rhsim13G0098600 PE=4 SV=1	26.9872	25.5476	26.257	26.1438	26.7457	27.0698	99.392	323.31
tr|A0A6A4M8Z6|A0A6A4M8Z6_9ERIC;tr|A0A834HJ59|A0A834HJ59_RHOSS	tr|A0A6A4M8Z6|A0A6A4M8Z6_9ERIC Alba domain-containing protein (Fragment) OS=Rhododendron williamsianum OX=262921 GN=C3L33_04306 PE=4 SV=1;tr|A0A834HJ59|A0A834HJ59_RHOSS Alba domain-containing protein OS=Rhododendron simsii OX=118357 GN=RHSIM_Rhsim01G025750	NaN	NaN	NaN	NaN	24.1347	23.9274	36.928	323.31
tr|A0A6A4M9R1|A0A6A4M9R1_9ERIC	tr|A0A6A4M9R1|A0A6A4M9R1_9ERIC Sucrose synthase (Fragment) OS=Rhododendron williamsianum OX=262921 GN=C3L33_04010 PE=3 SV=1	28.1829	28.0605	27.7328	27.4308	27.7415	27.5032	93.034	323.31
tr|D6MMT2|D6MMT2_9ERIC;tr|A0A834G033|A0A834G033_RHOSS;tr|A0A1P8NPT1|A0A1P8NPT1_9ERIC;tr|A0A834LYD5|A0A834LYD5_RHOSS;tr|A0A834HM85|A0A834HM85_RHOSS;tr|A0A834FZ60|A0A834FZ60_RHOSS;tr|A0A834LSH9|A0A834LSH9_RHOSS;tr|A0A834LUC6|A0A834LUC6_RHOSS;tr|A0A834L4L3|A0A834L4L3_RHOSS;tr|A0A834FTW0|A0A834FTW0_RHOSS;tr|A0A834FX39|A0A834FX39_RHOSS;tr|A0A834G050|A0A834G050_RHOSS;tr|A0A834L6H5|A0A834L6H5_RHOSS;tr|A…	tr|D6MMT2|D6MMT2_9ERIC Heat shock protein 70 OS=Rhododendron calophytum OX=479660 PE=2 SV=1;tr|A0A834G033|A0A834G033_RHOSS Uncharacterized protein OS=Rhododendron simsii OX=118357 GN=RHSIM_Rhsim13G0084100 PE=3 SV=1;tr|A0A1P8NPT1|A0A1P8NPT1_9ERIC Heat shock	29.6129	29.8568	29.741	29.5051	29.2854	30.1368	71.192	323.31
tr|A0A834G647|A0A834G647_RHOSS;tr|A0A6A4KWZ7|A0A6A4KWZ7_9ERIC	tr|A0A834G647|A0A834G647_RHOSS Protein kinase domain-containing protein OS=Rhododendron simsii OX=118357 GN=RHSIM_Rhsim11G0176000 PE=3 SV=1;tr|A0A6A4KWZ7|A0A6A4KWZ7_9ERIC Uncharacterized protein (Fragment) OS=Rhododendron williamsianum OX=262921 GN=C3L33_2	27.9508	27.2623	27.9062	27.784	27.4488	27.1832	151.83	323.31
tr|X5I323|X5I323_9ERIC;tr|A0A834GAI3|A0A834GAI3_RHOSS;tr|A0A6A4KQ81|A0A6A4KQ81_9ERIC;tr|A0A834LDN6|A0A834LDN6_RHOSS;tr|A0A6A4KVY8|A0A6A4KVY8_9ERIC;tr|F8WQK9|F8WQK9_9ERIC	tr|X5I323|X5I323_9ERIC Action OS=Vaccinium ashei OX=945837 GN=ACT PE=2 SV=1;tr|A0A834GAI3|A0A834GAI3_RHOSS Uncharacterized protein OS=Rhododendron simsii OX=118357 GN=RHSIM_Rhsim10G0141300 PE=3 SV=1;tr|A0A6A4KQ81|A0A6A4KQ81_9ERIC Uncharacterized protein (F	29.1442	29.9166	29.6352	30.2024	30.4663	30.6082	41.695	323.31
tr|A0A834GBJ7|A0A834GBJ7_RHOSS	tr|A0A834GBJ7|A0A834GBJ7_RHOSS Glutamine synthetase OS=Rhododendron simsii OX=118357 GN=RHSIM_Rhsim10G0178400 PE=3 SV=1	28.5283	28.4917	28.8882	28.577	28.7805	28.5686	39.2	323.31
tr|A0A834GGW3|A0A834GGW3_RHOSS;tr|A0A6A4KZN0|A0A6A4KZN0_9ERIC;tr|A0A834GEG2|A0A834GEG2_RHOSS	tr|A0A834GGW3|A0A834GGW3_RHOSS ATP synthase subunit beta OS=Rhododendron simsii OX=118357 GN=RHSIM_Rhsim09G0069100 PE=3 SV=1;tr|A0A6A4KZN0|A0A6A4KZN0_9ERIC H(+)-transporting two-sector ATPase (Fragment) OS=Rhododendron williamsianum OX=262921 GN=C3L33_1713	26.7967	26.5958	25.8186	26.9445	27.6219	26.5434	64.811	323.31
tr|A0A834GJK7|A0A834GJK7_RHOSS	tr|A0A834GJK7|A0A834GJK7_RHOSS Phospholipase D OS=Rhododendron simsii OX=118357 GN=RHSIM_Rhsim08G0214000 PE=3 SV=1	25.9659	27.3283	26.7396	27.1229	27.2159	26.4126	92.13	323.31
tr|A0A834GKB3|A0A834GKB3_RHOSS;tr|A0A6A4MF27|A0A6A4MF27_9ERIC	tr|A0A834GKB3|A0A834GKB3_RHOSS V-ATPase 69 kDa subunit OS=Rhododendron simsii OX=118357 GN=RHSIM_Rhsim08G0250100 PE=3 SV=1;tr|A0A6A4MF27|A0A6A4MF27_9ERIC V-ATPase 69 kDa subunit (Fragment) OS=Rhododendron williamsianum OX=262921 GN=C3L33_00028 PE=3 SV=1	26.2545	26.1621	27.198	26.5759	27.131	26.6827	68.9	323.31
tr|A0A834GM81|A0A834GM81_RHOSS;tr|A0A6A4MQ87|A0A6A4MQ87_9ERIC;tr|A0A834HBC0|A0A834HBC0_RHOSS	tr|A0A834GM81|A0A834GM81_RHOSS Coatomer subunit beta OS=Rhododendron simsii OX=118357 GN=RHSIM_Rhsim08G0248400 PE=4 SV=1;tr|A0A6A4MQ87|A0A6A4MQ87_9ERIC Uncharacterized protein (Fragment) OS=Rhododendron williamsianum OX=262921 GN=C3L33_00043 PE=4 SV=1	27.5766	27.2404	27.9933	28.5988	27.6101	27.6931	105.79	323.31
tr|A0A834GRA6|A0A834GRA6_RHOSS	tr|A0A834GRA6|A0A834GRA6_RHOSS Pectin acetylesterase OS=Rhododendron simsii OX=118357 GN=RHSIM_Rhsim07G0141400 PE=3 SV=1	24.4159	23.5791	25.23	24.9813	24.5964	24.2681	54.141	323.31
tr|A0A834GY77|A0A834GY77_RHOSS;tr|A0A6A4LY78|A0A6A4LY78_9ERIC	tr|A0A834GY77|A0A834GY77_RHOSS Aminotran_1_2 domain-containing protein OS=Rhododendron simsii OX=118357 GN=RHSIM_Rhsim07G0102700 PE=3 SV=1;tr|A0A6A4LY78|A0A6A4LY78_9ERIC Aminotran_1_2 domain-containing protein (Fragment) OS=Rhododendron williamsianum OX=26	27.0196	27.166	27.4854	26.6697	NaN	25.8299	87.382	323.31
tr|A0A834H2L4|A0A834H2L4_RHOSS	tr|A0A834H2L4|A0A834H2L4_RHOSS ATP citrate synthase OS=Rhododendron simsii OX=118357 GN=RHSIM_Rhsim04G0239000 PE=4 SV=1	26.5054	26.4837	25.8912	26.2586	25.8438	25.925	63.913	323.31
tr|A0A834LFK9|A0A834LFK9_RHOSS;tr|A0A6A4KVG6|A0A6A4KVG6_9ERIC;tr|A0A834L2F9|A0A834L2F9_RHOSS	tr|A0A834LFK9|A0A834LFK9_RHOSS Clathrin heavy chain OS=Rhododendron simsii OX=118357 GN=RHSIM_Rhsim09G0178400 PE=3 SV=1	28.5792	27.4433	29.4648	28.8464	29.3063	29.0119	193.03	323.31
tr|A0A834LFU7|A0A834LFU7_RHOSS;tr|A0A6A4MJ90|A0A6A4MJ90_9ERIC	tr|A0A834LFU7|A0A834LFU7_RHOSS Elongation factor Tu OS=Rhododendron simsii OX=118357 GN=RHSIM_Rhsim08G0178200 PE=3 SV=1;tr|A0A6A4MJ90|A0A6A4MJ90_9ERIC Uncharacterized protein (Fragment) OS=Rhododendron williamsianum OX=262921 GN=C3L33_00628 PE=3 SV=1	26.5769	26.6064	24.8334	26.5188	26.048	26.3589	50.049	323.31
tr|A0A834LPM3|A0A834LPM3_RHOSS	tr|A0A834LPM3|A0A834LPM3_RHOSS Oxoglutarate dehydrogenase (succinyl-transferring) OS=Rhododendron simsii OX=118357 GN=RHSIM_Rhsim03G0127100 PE=3 SV=1	26.4069	26.6321	26.0208	25.967	27.013	26.2409	149.11	323.31
tr|A0A834LTJ3|A0A834LTJ3_RHOSS;tr|A0A6A4M6F4|A0A6A4M6F4_9ERIC	tr|A0A834LTJ3|A0A834LTJ3_RHOSS Phosphopyruvate hydratase OS=Rhododendron simsii OX=118357 GN=RHSIM_Rhsim03G0171300 PE=3 SV=1;tr|A0A6A4M6F4|A0A6A4M6F4_9ERIC Phosphopyruvate hydratase (Fragment) OS=Rhododendron williamsianum OX=262921 GN=C3L33_03123 PE=3 SV=	28.0489	28.4417	27.4928	27.5889	27.5314	27.5174	45.741	323.31
tr|A0A834LTN6|A0A834LTN6_RHOSS	tr|A0A834LTN6|A0A834LTN6_RHOSS 5-methyltetrahydropteroyltriglutamate--homocysteine S-methyltransferase OS=Rhododendron simsii OX=118357 GN=RHSIM_Rhsim03G0053000 PE=3 SV=1	29.0274	29.4832	29.6273	29.3996	29.1065	29.2987	89.368	323.31
tr|A0A834LV15|A0A834LV15_RHOSS;tr|A0A6A4KXR9|A0A6A4KXR9_9ERIC	tr|A0A834LV15|A0A834LV15_RHOSS Aspartate aminotransferase OS=Rhododendron simsii OX=118357 GN=RHSIM_Rhsim02G0181400 PE=3 SV=1;tr|A0A6A4KXR9|A0A6A4KXR9_9ERIC Aspartate aminotransferase (Fragment) OS=Rhododendron williamsianum OX=262921 GN=C3L33_15804 PE=3 S	28.8913	28.9957	29.5719	29.0059	29.0355	28.9545	51.486	323.31
tr|A0A834LWF2|A0A834LWF2_RHOSS;tr|A0A6A4L5M7|A0A6A4L5M7_9ERIC;tr|A0A834LHR4|A0A834LHR4_RHOSS;tr|A0A6A4LUU4|A0A6A4LUU4_9ERIC	tr|A0A834LWF2|A0A834LWF2_RHOSS Protein transport protein SEC23 OS=Rhododendron simsii OX=118357 GN=RHSIM_Rhsim02G0069600 PE=3 SV=1;tr|A0A6A4L5M7|A0A6A4L5M7_9ERIC Protein transport protein SEC23 (Fragment) OS=Rhododendron williamsianum OX=262921 GN=C3L33_15	24.1534	24.6568	24.739	24.3249	NaN	24.6236	88.781	323.31
tr|Q31779|Q31779_ARBCA;tr|U3G063|U3G063_ARBUN;tr|A0A0A7NX68|A0A0A7NX68_ARBUN;tr|A0A0F7EWA3|A0A0F7EWA3_ARCAL;tr|A0A6F8SNM0|A0A6F8SNM0_9ERIC;tr|A0A0F7G516|A0A0F7G516_9ERIC;tr|Q71N68|Q71N68_RHOGE;sp|P28447|RBL_RHOHI;tr|Q37157|Q37157_ARDCR;tr|Q8SLM1|Q8SLM1_EM	tr|Q31779|Q31779_ARBCA Ribulose bisphosphate carboxylase large chain (Fragment) OS=Arbutus canariensis OX=13343 GN=rbcL PE=3 SV=2;tr|U3G063|U3G063_ARBUN Ribulose bisphosphate carboxylase large chain OS=Arbutus unedo OX=84005 GN=rbcL PE=3 SV=1;tr|A0A0A7NX68	30.4231	30.3049	29.0323	28.9096	29.0673	28.7154	51.63	323.31
tr|V9PBV0|V9PBV0_VACMA;tr|B0FA00|B0FA00_9ERIC;tr|A0A7M1LC10|A0A7M1LC10_RHOSS;tr|A0A834FY43|A0A834FY43_RHOSS;tr|Q8SIC5|Q8SIC5_9ERIC;tr|E5LEZ4|E5LEZ4_9ERIC;tr|E5LEY5|E5LEY5_9ERIC;tr|I1ZHA6|I1ZHA6_9ERIC;tr|E5DK37|E5DK37_ARBCA;tr|Q8SIG1|Q8SIG1_CHIUM;tr|Q3ZMK4|Q3ZMK4_RHOIM;tr|Q8SIF3|Q8SIF3_EMPNI;tr|Q8SIF2|Q8SIF2_ENKCA;tr|A0A834FX42|A0A834FX42_RHOSS;tr|A0A834GQW4|A0A834GQW4_RHOSS;tr|A0A834HDE9|A0A834HD…	tr|V9PBV0|V9PBV0_VACMA ATP synthase subunit alpha OS=Vaccinium macrocarpon OX=13750 GN=atp1 PE=3 SV=1;tr|B0FA00|B0FA00_9ERIC ATP synthase subunit alpha (Fragment) OS=Vaccinium arboreum OX=229201 GN=atp1 PE=3 SV=1;tr|A0A7M1LC10|A0A7M1LC10_RHOSS ATP synthase	27.6085	27.4002	28.7838	28.0079	28.5792	28.5842	55.47	323.31
tr|A0A834G7U1|A0A834G7U1_RHOSS;tr|A0A834GBK9|A0A834GBK9_RHOSS;tr|A0A834GB13|A0A834GB13_RHOSS;tr|A0A834G6Q5|A0A834G6Q5_RHOSS;tr|A0A6A4KQ06|A0A6A4KQ06_9ERIC;tr|A0A6A4KU14|A0A6A4KU14_9ERIC;tr|A0A834L8A4|A0A834L8A4_RHOSS;tr|A0A834G3D1|A0A834G3D1_RHOSS;tr|A0A834GG45|A0A834GG45_RHOSS;tr|A0A6A4KSQ7|A0A6A4KSQ7_9ERIC;tr|A0A6A4L7B3|A0A6A4L7B3_9ERIC;tr|A0A6A4KMD0|A0A6A4KMD0_9ERIC;tr|A0A6A4KXJ2|A0A6A4KXJ2_9E…	tr|A0A834G7U1|A0A834G7U1_RHOSS Uncharacterized protein OS=Rhododendron simsii OX=118357 GN=RHSIM_Rhsim11G0041300 PE=3 SV=1;tr|A0A834GBK9|A0A834GBK9_RHOSS Uncharacterized protein OS=Rhododendron simsii OX=118357 GN=RHSIM_Rhsim08G0179700 PE=3 SV=1;tr|A0A834G	28.5511	27.7804	28.7655	28.5311	28.5382	28.9034	46.741	313.57
tr|A0A834LLS5|A0A834LLS5_RHOSS;tr|A0A834GRJ6|A0A834GRJ6_RHOSS;tr|A0A834LIQ2|A0A834LIQ2_RHOSS;tr|A0A6A4LQW0|A0A6A4LQW0_9ERIC;tr|A0A6A4LFF1|A0A6A4LFF1_9ERIC;tr|A0A6A4M114|A0A6A4M114_9ERIC	tr|A0A834LLS5|A0A834LLS5_RHOSS Aspartate--tRNA ligase OS=Rhododendron simsii OX=118357 GN=RHSIM_Rhsim07G0113300 PE=3 SV=1;tr|A0A834GRJ6|A0A834GRJ6_RHOSS Aspartate--tRNA ligase OS=Rhododendron simsii OX=118357 GN=RHSIM_Rhsim07G0113700 PE=3 SV=1;tr|A0A834LIQ	25.9963	25.7889	NaN	25.973	NaN	26.2864	59.944	308.49
tr|V9PBK9|V9PBK9_VACMA;tr|A0A7M1LDS3|A0A7M1LDS3_RHOSS;tr|A0A834G042|A0A834G042_RHOSS	tr|V9PBK9|V9PBK9_VACMA NADH dehydrogenase subunit 7 OS=Vaccinium macrocarpon OX=13750 GN=nad7 PE=3 SV=1;tr|A0A7M1LDS3|A0A7M1LDS3_RHOSS NADH dehydrogenase subunit 7 OS=Rhododendron simsii OX=118357 GN=nad7 PE=3 SV=1;tr|A0A834G042|A0A834G042_RHOSS Complex1_4	26.6182	26.1993	27.0086	26.911	26.3775	26.4441	44.385	299.99
tr|U3G044|U3G044_ARBUN;tr|A0A6H1U989|A0A6H1U989_9ERIC;tr|D3WCQ6|D3WCQ6_RHOSS;tr|A0A1B0ZEW4|A0A1B0ZEW4_9ERIC;tr|A0A1B1CZM3|A0A1B1CZM3_9ERIC;tr|A0A8F5CDG6|A0A8F5CDG6_9ERIC;tr|A0A8F5CD03|A0A8F5CD03_9ERIC;tr|A0A8F5CCW9|A0A8F5CCW9_9ERIC;tr|A0A8F3ELJ4|A0A8F3ELJ4_RHOML;tr|A0A8E5N7Q9|A0A8E5N7Q9_9ERIC;tr|A0A898CTL6|A0A898CTL6_9ERIC;tr|A0A7M1ICH1|A0A7M1ICH1_9ERIC;tr|A0A7D5JLC7|A0A7D5JLC7_9ERIC;tr|A0A6B9JDH…	tr|U3G044|U3G044_ARBUN ATP synthase subunit alpha, chloroplastic OS=Arbutus unedo OX=84005 GN=atpA PE=3 SV=1;tr|A0A6H1U989|A0A6H1U989_9ERIC ATP synthase subunit alpha, chloroplastic OS=Rhododendron delavayi var. delavayi OX=1495201 GN=atpA PE=3 SV=1;tr|D3W	27.4239	27.8334	27.5676	27.5426	26.9588	27.3561	55.262	296.33
tr|A0A6A4KZB6|A0A6A4KZB6_9ERIC;tr|A0A834GCT9|A0A834GCT9_RHOSS	tr|A0A6A4KZB6|A0A6A4KZB6_9ERIC UDP-arabinopyranose mutase (Fragment) OS=Rhododendron williamsianum OX=262921 GN=C3L33_18723 PE=3 SV=1;tr|A0A834GCT9|A0A834GCT9_RHOSS UDP-arabinopyranose mutase OS=Rhododendron simsii OX=118357 GN=RHSIM_Rhsim10G0056100 PE=3 S	NaN	NaN	NaN	25.1855	24.9993	25.3282	41.64	293.01
tr|A0A834GZK8|A0A834GZK8_RHOSS;tr|A0A6A4KZ65|A0A6A4KZ65_9ERIC	tr|A0A834GZK8|A0A834GZK8_RHOSS Eukaryotic translation initiation factor 3 subunit A OS=Rhododendron simsii OX=118357 GN=RHSIM_Rhsim05G0135800 PE=3 SV=1;tr|A0A6A4KZ65|A0A6A4KZ65_9ERIC PCI domain-containing protein (Fragment) OS=Rhododendron williamsianum OX	NaN	NaN	NaN	24.0541	NaN	24.2307	110.7	288.05
tr|A0A834G9N6|A0A834G9N6_RHOSS;tr|A0A6A4LCV3|A0A6A4LCV3_9ERIC;tr|A0A834G743|A0A834G743_RHOSS	tr|A0A834G9N6|A0A834G9N6_RHOSS UDP-arabinopyranose mutase OS=Rhododendron simsii OX=118357 GN=RHSIM_Rhsim12G0149600 PE=3 SV=1;tr|A0A6A4LCV3|A0A6A4LCV3_9ERIC UDP-arabinopyranose mutase (Fragment) OS=Rhododendron williamsianum OX=262921 GN=C3L33_14210 PE=3 S	28.8817	29.9973	28.5945	29.1842	29.2965	29.488	40.87	287.48
tr|A0A834HIX9|A0A834HIX9_RHOSS;tr|A0A6A4LAU6|A0A6A4LAU6_9ERIC;tr|I1U4K8|I1U4K8_9ERIC;tr|A0A6A4LH25|A0A6A4LH25_9ERIC;tr|A0A6A4KIP4|A0A6A4KIP4_9ERIC;tr|A0A834GTK1|A0A834GTK1_RHOSS	tr|A0A834HIX9|A0A834HIX9_RHOSS Malate dehydrogenase OS=Rhododendron simsii OX=118357 GN=RHSIM_Rhsim02G0037400 PE=3 SV=1;tr|A0A6A4LAU6|A0A6A4LAU6_9ERIC Malate dehydrogenase (Fragment) OS=Rhododendron williamsianum OX=262921 GN=C3L33_15068 PE=3 SV=1;tr|I1U4K	24.9527	NaN	NaN	NaN	24.8149	24.1443	88.91	286.22
tr|A0A6A4LR12|A0A6A4LR12_9ERIC	tr|A0A6A4LR12|A0A6A4LR12_9ERIC Uncharacterized protein (Fragment) OS=Rhododendron williamsianum OX=262921 GN=C3L33_10269 PE=3 SV=1	26.5823	26.939	26.2715	25.771	25.3304	25.157	42.558	286.02
tr|A0A834LV39|A0A834LV39_RHOSS;tr|A0A6A4LBI2|A0A6A4LBI2_9ERIC;tr|A0A834LX87|A0A834LX87_RHOSS;tr|A0A6A4L9G2|A0A6A4L9G2_9ERIC;tr|G3BG93|G3BG93_9ERIC;tr|L8AXE9|L8AXE9_PHYNP;tr|G3BG84|G3BG84_9ERIC;tr|K4EJU6|K4EJU6_RHOSB;tr|K4EJS6|K4EJS6_9ERIC;tr|K4EJI2|K4EJI2_9ERIC;tr|G3BG99|G3BG99_9ERIC;tr|G3BG98|G3BG98_9ERIC;tr|G3BG97|G3BG97_9ERIC;tr|G3BG91|G3BG91_9ERIC;tr|G3BG95|G3BG95_9ERIC;tr|G3BG83|G3BG83_9ERIC…	tr|A0A834LV39|A0A834LV39_RHOSS 40S ribosomal protein SA OS=Rhododendron simsii OX=118357 GN=RHSIM_Rhsim02G0252600 PE=3 SV=1;tr|A0A6A4LBI2|A0A6A4LBI2_9ERIC Uncharacterized protein (Fragment) OS=Rhododendron williamsianum OX=262921 GN=C3L33_16195 PE=3 SV=1;t	28.5539	29.5657	28.1544	28.6209	28.5995	28.8749	46.922	285.55
tr|A0A6A4KNX2|A0A6A4KNX2_9ERIC	tr|A0A6A4KNX2|A0A6A4KNX2_9ERIC Alpha-1,4 glucan phosphorylase (Fragment) OS=Rhododendron williamsianum OX=262921 GN=C3L33_18765 PE=3 SV=1	26.6867	25.086	26.1914	26.0106	25.3449	25.3286	106.8	280.14
tr|A0A834GTU4|A0A834GTU4_RHOSS;tr|A0A834LS08|A0A834LS08_RHOSS;tr|A0A6A4LBE0|A0A6A4LBE0_9ERIC;tr|A0A6A4L911|A0A6A4L911_9ERIC	tr|A0A834GTU4|A0A834GTU4_RHOSS Uncharacterized protein OS=Rhododendron simsii OX=118357 GN=RHSIM_Rhsim07G0079900 PE=3 SV=1;tr|A0A834LS08|A0A834LS08_RHOSS Uncharacterized protein OS=Rhododendron simsii OX=118357 GN=RHSIM_Rhsim02G0248700 PE=4 SV=1;tr|A0A6A4L	24.1425	24.9499	NaN	23.2055	NaN	24.2453	73.612	277
tr|A0A6A4KY05|A0A6A4KY05_9ERIC;tr|A0A834GEG5|A0A834GEG5_RHOSS;tr|A0A834GI20|A0A834GI20_RHOSS;tr|A0A292GD22|A0A292GD22_PHYNP;tr|A0A292GC44|A0A292GC44_9ERIC;tr|A0A292GBA0|A0A292GBA0_PHYEM;tr|A0A292GB63|A0A292GB63_9ERIC;tr|A0A292G606|A0A292G606_9ERIC;tr|A0A292G4P3|A0A292G4P3_PHYCU;tr|A0A2Z5VG13|A0A2Z5VG13_9ERIC;tr|A0A292GBA9|A0A292GBA9_9ERIC;tr|A0A2Z5VFQ2|A0A2Z5VFQ2_9ERIC	tr|A0A6A4KY05|A0A6A4KY05_9ERIC Iso_dh domain-containing protein (Fragment) OS=Rhododendron williamsianum OX=262921 GN=C3L33_17956 PE=3 SV=1;tr|A0A834GEG5|A0A834GEG5_RHOSS Isocitrate dehydrogenase [NADP] OS=Rhododendron simsii OX=118357 GN=RHSIM_Rhsim10G018	28.6803	27.6758	27.1656	27.3478	28.3371	28.3693	45.271	270.29
tr|A0A6A4L1L1|A0A6A4L1L1_9ERIC;tr|A0A834L5K6|A0A834L5K6_RHOSS	tr|A0A6A4L1L1|A0A6A4L1L1_9ERIC Diadenosine tetraphosphate synthetase (Fragment) OS=Rhododendron williamsianum OX=262921 GN=C3L33_14504 PE=3 SV=1;tr|A0A834L5K6|A0A834L5K6_RHOSS Diadenosine tetraphosphate synthetase OS=Rhododendron simsii OX=118357 GN=RHSIM_	27.1594	26.9076	26.9326	26.8301	25.9766	27.166	67.065	268.7
tr|A0A834GBR1|A0A834GBR1_RHOSS	tr|A0A834GBR1|A0A834GBR1_RHOSS Iso_dh domain-containing protein OS=Rhododendron simsii OX=118357 GN=RHSIM_Rhsim10G0199600 PE=3 SV=1	26.9772	26.6697	26.5329	27.497	27.353	27.1783	36.892	268.56
tr|A0A834HBZ4|A0A834HBZ4_RHOSS;tr|A0A6A4L412|A0A6A4L412_9ERIC;tr|A0A834GHF5|A0A834GHF5_RHOSS;tr|A0A834LG53|A0A834LG53_RHOSS	tr|A0A834HBZ4|A0A834HBZ4_RHOSS Adenosylhomocysteinase OS=Rhododendron simsii OX=118357 GN=RHSIM_Rhsim02G0062100 PE=3 SV=1;tr|A0A6A4L412|A0A6A4L412_9ERIC Adenosylhomocysteinase (Fragment) OS=Rhododendron williamsianum OX=262921 GN=C3L33_15205 PE=3 SV=1	28.0952	27.929	28.419	28.1442	27.4838	27.9543	53.219	265.85
tr|U3G064|U3G064_ARBUN;tr|Q9M4Q3|Q9M4Q3_ARBUN;tr|A0A8F5CCN1|A0A8F5CCN1_9ERIC;tr|A0A7M1ICN3|A0A7M1ICN3_9ERIC;tr|A0A6B9JJC9|A0A6B9JJC9_9ERIC;tr|A0A6H1U801|A0A6H1U801_9ERIC;tr|A0A7D5FGS8|A0A7D5FGS8_9ERIC;tr|Q8SLS3|Q8SLS3_9ERIC;tr|A0A4D6PZL8|A0A4D6PZL8_9ERIC;tr|A0A1X9PJ48|A0A1X9PJ48_9ERIC;tr|A0A1X9PLR4|A0A1X9PLR4_9ERIC;tr|A0A1X9PMB3|A0A1X9PMB3_9ERIC;tr|A0A1X9PPP1|A0A1X9PPP1_9ERIC;tr|A0A8F5H4S9|A0A8F5…	tr|U3G064|U3G064_ARBUN ATP synthase subunit beta, chloroplastic OS=Arbutus unedo OX=84005 GN=atpB PE=3 SV=1;tr|Q9M4Q3|Q9M4Q3_ARBUN ATP synthase subunit beta (Fragment) OS=Arbutus unedo OX=84005 GN=atpB PE=3 SV=1;tr|A0A8F5CCN1|A0A8F5CCN1_9ERIC ATP synthase	25.4198	25.2836	25.8139	25.8349	26.3769	25.3665	53.931	262.15
tr|A0A6A4LFI6|A0A6A4LFI6_9ERIC;tr|A0A834H1K7|A0A834H1K7_RHOSS	tr|A0A6A4LFI6|A0A6A4LFI6_9ERIC Phosphoenolpyruvate carboxylase (Fragment) OS=Rhododendron williamsianum OX=262921 GN=C3L33_11733 PE=3 SV=1;tr|A0A834H1K7|A0A834H1K7_RHOSS Phosphoenolpyruvate carboxylase OS=Rhododendron simsii OX=118357 GN=RHSIM_Rhsim04G0026	28.074	27.1672	27.563	27.6375	27.45	27.9477	109.92	254.55
tr|A0A6A4KXU7|A0A6A4KXU7_9ERIC	tr|A0A6A4KXU7|A0A6A4KXU7_9ERIC Sucrose synthase (Fragment) OS=Rhododendron williamsianum OX=262921 GN=C3L33_19213 PE=3 SV=1	28.6127	28.1808	28.4542	28.3007	29.2197	29.1757	90.277	245.07
tr|A0A834LFI5|A0A834LFI5_RHOSS;tr|A0A6A4LNY6|A0A6A4LNY6_9ERIC	tr|A0A834LFI5|A0A834LFI5_RHOSS Uncharacterized protein OS=Rhododendron simsii OX=118357 GN=RHSIM_Rhsim07G0088700 PE=3 SV=1;tr|A0A6A4LNY6|A0A6A4LNY6_9ERIC Uncharacterized protein (Fragment) OS=Rhododendron williamsianum OX=262921 GN=C3L33_08538 PE=3 SV=1	26.7757	NaN	26.4825	26.8013	26.4414	26.4643	103.06	240.94
tr|A0A834L8E9|A0A834L8E9_RHOSS;tr|A0A834G503|A0A834G503_RHOSS;tr|A0A834L8K7|A0A834L8K7_RHOSS;tr|A0A834G5X4|A0A834G5X4_RHOSS;tr|A0A834G555|A0A834G555_RHOSS;tr|A0A6A4LAH3|A0A6A4LAH3_9ERIC	tr|A0A834L8E9|A0A834L8E9_RHOSS Uncharacterized protein OS=Rhododendron simsii OX=118357 GN=RHSIM_Rhsim12G0197900 PE=4 SV=1;tr|A0A834G503|A0A834G503_RHOSS OVATE domain-containing protein OS=Rhododendron simsii OX=118357 GN=RHSIM_Rhsim12G0198100 PE=4 SV=1;tr	27.3821	27.4252	26.7914	26.7173	26.8357	27.0315	93.614	238.68
tr|A0A6A4M5S9|A0A6A4M5S9_9ERIC;tr|A0A6A4M0Q2|A0A6A4M0Q2_9ERIC	tr|A0A6A4M5S9|A0A6A4M5S9_9ERIC Phosphopyruvate hydratase (Fragment) OS=Rhododendron williamsianum OX=262921 GN=C3L33_02557 PE=3 SV=1	28.0482	28.6107	27.8757	27.6364	27.6181	28.2617	45.467	237.86
tr|A0A6A4LBC2|A0A6A4LBC2_9ERIC	tr|A0A6A4LBC2|A0A6A4LBC2_9ERIC Uncharacterized protein (Fragment) OS=Rhododendron williamsianum OX=262921 GN=C3L33_10243 PE=3 SV=1	23.1866	NaN	23.2284	NaN	NaN	NaN	102.15	232.55
tr|A0A834GB46|A0A834GB46_RHOSS;tr|A0A6A4L043|A0A6A4L043_9ERIC;tr|A0A834GI74|A0A834GI74_RHOSS;tr|A0A834LA04|A0A834LA04_RHOSS	tr|A0A834GB46|A0A834GB46_RHOSS Uncharacterized protein OS=Rhododendron simsii OX=118357 GN=RHSIM_Rhsim10G0014200 PE=3 SV=1;tr|A0A6A4L043|A0A6A4L043_9ERIC Uncharacterized protein (Fragment) OS=Rhododendron williamsianum OX=262921 GN=C3L33_19046 PE=3 SV=1;tr	26.0581	25.8946	23.3281	25.9458	24.4903	24.8468	85.44	228.93
tr|A0A6A4KRH6|A0A6A4KRH6_9ERIC;tr|A0A834H687|A0A834H687_RHOSS;tr|A0A834G8X3|A0A834G8X3_RHOSS;tr|A0A834G878|A0A834G878_RHOSS;tr|A0A6A4KK79|A0A6A4KK79_9ERIC	tr|A0A6A4KRH6|A0A6A4KRH6_9ERIC Uncharacterized protein (Fragment) OS=Rhododendron williamsianum OX=262921 GN=C3L33_19787 PE=3 SV=1;tr|A0A834H687|A0A834H687_RHOSS Uncharacterized protein OS=Rhododendron simsii OX=118357 GN=RHSIM_Rhsim05G0113400 PE=3 SV=1	26.0413	NaN	NaN	NaN	NaN	25.25	61.575	220.28
tr|A0A834GLA1|A0A834GLA1_RHOSS	tr|A0A834GLA1|A0A834GLA1_RHOSS Ribonuclease OS=Rhododendron simsii OX=118357 GN=RHSIM_Rhsim08G0199800 PE=4 SV=1	26.308	25.5004	26.0881	26.3353	26.2216	26.4817	109.99	219.65
tr|A0A834HIW7|A0A834HIW7_RHOSS;tr|A0A6A4M3J8|A0A6A4M3J8_9ERIC	tr|A0A834HIW7|A0A834HIW7_RHOSS Aha1_N domain-containing protein OS=Rhododendron simsii OX=118357 GN=RHSIM_Rhsim03G0004900 PE=3 SV=1;tr|A0A6A4M3J8|A0A6A4M3J8_9ERIC Aha1_N domain-containing protein (Fragment) OS=Rhododendron williamsianum OX=262921 GN=C3L33_	25.3013	25.1702	24.8533	25.4083	25.4586	25.6998	39.256	214.85
tr|A0A834H0N4|A0A834H0N4_RHOSS;tr|A0A6A4LWK5|A0A6A4LWK5_9ERIC;tr|A0A6A4M870|A0A6A4M870_9ERIC;tr|A0A834HPX5|A0A834HPX5_RHOSS	tr|A0A834H0N4|A0A834H0N4_RHOSS Sec16_C domain-containing protein OS=Rhododendron simsii OX=118357 GN=RHSIM_Rhsim07G0059400 PE=3 SV=1;tr|A0A6A4LWK5|A0A6A4LWK5_9ERIC Sec16_C domain-containing protein (Fragment) OS=Rhododendron williamsianum OX=262921 GN=C3L3	26.3409	NaN	26.3452	25.9069	26.3922	25.9668	126.3	214.61
tr|A0A834GQ61|A0A834GQ61_RHOSS;tr|A0A6A4LQ76|A0A6A4LQ76_9ERIC;tr|A0A834HBA4|A0A834HBA4_RHOSS;tr|A0A6A4LKQ4|A0A6A4LKQ4_9ERIC;tr|A0A834LMC4|A0A834LMC4_RHOSS	tr|A0A834GQ61|A0A834GQ61_RHOSS Uncharacterized protein OS=Rhododendron simsii OX=118357 GN=RHSIM_Rhsim07G0252800 PE=3 SV=1;tr|A0A6A4LQ76|A0A6A4LQ76_9ERIC Uncharacterized protein (Fragment) OS=Rhododendron williamsianum OX=262921 GN=C3L33_09434 PE=3 SV=1	26.8858	26.2479	26.9096	27.8391	27.3135	28.8502	59.791	209.43
tr|A0A834L399|A0A834L399_RHOSS;tr|A0A6A4LVK2|A0A6A4LVK2_9ERIC	tr|A0A834L399|A0A834L399_RHOSS Endoglucanase OS=Rhododendron simsii OX=118357 GN=RHSIM_Rhsim13G0008700 PE=3 SV=1;tr|A0A6A4LVK2|A0A6A4LVK2_9ERIC Pectinesterase (Fragment) OS=Rhododendron williamsianum OX=262921 GN=C3L33_07636 PE=3 SV=1	26.7268	26.572	27.123	27.6916	29.5053	28.9226	221.41	209.17
tr|A0A834H752|A0A834H752_RHOSS	tr|A0A834H752|A0A834H752_RHOSS Malic enzyme OS=Rhododendron simsii OX=118357 GN=RHSIM_Rhsim03G0237400 PE=3 SV=1	27.7426	28.305	27.1142	27.2997	26.0908	27.6723	66.37	205.47
tr|A0A834G7N9|A0A834G7N9_RHOSS;tr|A0A6A4KWF1|A0A6A4KWF1_9ERIC;tr|A0A6A4KSV2|A0A6A4KSV2_9ERIC	tr|A0A834G7N9|A0A834G7N9_RHOSS S-methyl-5-thioribose kinase OS=Rhododendron simsii OX=118357 GN=RHSIM_Rhsim11G0159300 PE=3 SV=1;tr|A0A6A4KWF1|A0A6A4KWF1_9ERIC APH domain-containing protein (Fragment) OS=Rhododendron williamsianum OX=262921 GN=C3L33_20953 P	26.9156	27.0716	NaN	26.5546	25.9905	26.5714	47.425	196.99
tr|A0A834GNJ2|A0A834GNJ2_RHOSS;tr|A0A6A4LM78|A0A6A4LM78_9ERIC;tr|A0A6A4KCQ8|A0A6A4KCQ8_9ERIC	tr|A0A834GNJ2|A0A834GNJ2_RHOSS Malic enzyme OS=Rhododendron simsii OX=118357 GN=RHSIM_Rhsim07G0145700 PE=3 SV=1;tr|A0A6A4LM78|A0A6A4LM78_9ERIC Malic enzyme (Fragment) OS=Rhododendron williamsianum OX=262921 GN=C3L33_08946 PE=3 SV=1	23.558	24.3008	25.1449	23.935	23.9948	23.6697	78.024	194.18
tr|A0A834FXD5|A0A834FXD5_RHOSS;tr|A0A6A4LMW6|A0A6A4LMW6_9ERIC	tr|A0A834FXD5|A0A834FXD5_RHOSS Alanine--glyoxylate transaminase OS=Rhododendron simsii OX=118357 GN=RHSIM_Rhsim13G0215900 PE=3 SV=1;tr|A0A6A4LMW6|A0A6A4LMW6_9ERIC Aminotran_5 domain-containing protein (Fragment) OS=Rhododendron williamsianum OX=262921 GN=C	27.3066	27.0934	25.4501	26.4401	26.673	27.399	45.891	192.37
tr|A0A834GG08|A0A834GG08_RHOSS;tr|A0A6A4L8L6|A0A6A4L8L6_9ERIC	tr|A0A834GG08|A0A834GG08_RHOSS Ubiquitinyl hydrolase 1 OS=Rhododendron simsii OX=118357 GN=RHSIM_Rhsim09G0140000 PE=3 SV=1;tr|A0A6A4L8L6|A0A6A4L8L6_9ERIC Ubiquitinyl hydrolase 1 (Fragment) OS=Rhododendron williamsianum OX=262921 GN=C3L33_16853 PE=3 SV=1	26.7004	NaN	25.1097	25.0095	24.8264	NaN	166.8	181.72
tr|A0A834G059|A0A834G059_RHOSS;tr|A0A6A4M0T2|A0A6A4M0T2_9ERIC	tr|A0A834G059|A0A834G059_RHOSS Lipoxygenase OS=Rhododendron simsii OX=118357 GN=RHSIM_Rhsim13G0225600 PE=3 SV=1	29.0167	28.8928	27.5775	27.9557	27.6094	27.8415	101.61	181.44
tr|A0A6A4LWC6|A0A6A4LWC6_9ERIC;tr|A0A834GQW0|A0A834GQW0_RHOSS;tr|A0A834LJI3|A0A834LJI3_RHOSS	tr|A0A6A4LWC6|A0A6A4LWC6_9ERIC AAA domain-containing protein (Fragment) OS=Rhododendron williamsianum OX=262921 GN=C3L33_09483 PE=3 SV=1;tr|A0A834GQW0|A0A834GQW0_RHOSS AAA domain-containing protein OS=Rhododendron simsii OX=118357 GN=RHSIM_Rhsim07G0243000	26.1755	26.948	27.4873	27.4012	27.6726	27.3476	44.702	179.55
tr|A0A6A4KMR0|A0A6A4KMR0_9ERIC;tr|A0A834LQF6|A0A834LQF6_RHOSS	tr|A0A6A4KMR0|A0A6A4KMR0_9ERIC Uncharacterized protein (Fragment) OS=Rhododendron williamsianum OX=262921 GN=C3L33_22717 PE=3 SV=1;tr|A0A834LQF6|A0A834LQF6_RHOSS Uncharacterized protein OS=Rhododendron simsii OX=118357 GN=RHSIM_Rhsim04G0127300 PE=3 SV=1	NaN	NaN	NaN	NaN	25.0329	24.5051	50.295	179.49
tr|A0A6A4MAP8|A0A6A4MAP8_9ERIC;tr|A0A834M2I7|A0A834M2I7_RHOSS	tr|A0A6A4MAP8|A0A6A4MAP8_9ERIC S-(hydroxymethyl)glutathione dehydrogenase (Fragment) OS=Rhododendron williamsianum OX=262921 GN=C3L33_04286 PE=3 SV=1;tr|A0A834M2I7|A0A834M2I7_RHOSS S-(hydroxymethyl)glutathione dehydrogenase OS=Rhododendron simsii OX=118357	26.6309	27.773	28.8989	28.5726	27.5385	27.6196	41.122	176.86
tr|A0A834G4T4|A0A834G4T4_RHOSS;tr|A0A6A4LBA2|A0A6A4LBA2_9ERIC	tr|A0A834G4T4|A0A834G4T4_RHOSS Uncharacterized protein OS=Rhododendron simsii OX=118357 GN=RHSIM_Rhsim12G0006200 PE=3 SV=1;tr|A0A6A4LBA2|A0A6A4LBA2_9ERIC Uncharacterized protein (Fragment) OS=Rhododendron williamsianum OX=262921 GN=C3L33_13201 PE=3 SV=1	NaN	23.9257	24.2849	24.6955	25.7116	25.6081	68.129	176.68
tr|A0A834GRY6|A0A834GRY6_RHOSS;tr|A0A834LTB3|A0A834LTB3_RHOSS;tr|A0A6A4LGI0|A0A6A4LGI0_9ERIC;tr|A0A6A4M2V8|A0A6A4M2V8_9ERIC;tr|A0A6A4LJV0|A0A6A4LJV0_9ERIC	tr|A0A834GRY6|A0A834GRY6_RHOSS HATPase_c domain-containing protein OS=Rhododendron simsii OX=118357 GN=RHSIM_Rhsim06G0232600 PE=3 SV=1;tr|A0A834LTB3|A0A834LTB3_RHOSS HATPase_c domain-containing protein OS=Rhododendron simsii OX=118357 GN=RHSIM_Rhsim03G0191	26.578	26.2669	27.5704	27.5873	27.5919	27.6048	80.318	176.32
tr|A0A834GTK2|A0A834GTK2_RHOSS;tr|A0A834GV77|A0A834GV77_RHOSS;tr|A0A6A4L8F6|A0A6A4L8F6_9ERIC;tr|A0A1J0A0N6|A0A1J0A0N6_RHOML;tr|A0A6A4LLS6|A0A6A4LLS6_9ERIC	tr|A0A834GTK2|A0A834GTK2_RHOSS Glyceraldehyde-3-phosphate dehydrogenase OS=Rhododendron simsii OX=118357 GN=RHSIM_Rhsim07G0257000 PE=3 SV=1;tr|A0A834GV77|A0A834GV77_RHOSS Glyceraldehyde-3-phosphate dehydrogenase OS=Rhododendron simsii OX=118357 GN=RHSIM_Rh	24.8698	25.0799	NaN	24.2117	NaN	22.8087	45.666	171.99
tr|A0A834G0K1|A0A834G0K1_RHOSS;tr|A0A6A4L7J4|A0A6A4L7J4_9ERIC;tr|A0A834LTV7|A0A834LTV7_RHOSS	tr|A0A834G0K1|A0A834G0K1_RHOSS Acetylornithine transaminase OS=Rhododendron simsii OX=118357 GN=RHSIM_Rhsim12G0188700 PE=3 SV=1;tr|A0A6A4L7J4|A0A6A4L7J4_9ERIC Acetylornithine transaminase (Fragment) OS=Rhododendron williamsianum OX=262921 GN=C3L33_14541 PE	NaN	NaN	23.6516	24.2621	NaN	NaN	48.429	165.13
tr|A0A6A4KF34|A0A6A4KF34_9ERIC	tr|A0A6A4KF34|A0A6A4KF34_9ERIC Pectin acetylesterase (Fragment) OS=Rhododendron williamsianum OX=262921 GN=C3L33_21369 PE=3 SV=1	NaN	22.423	NaN	NaN	NaN	22.0087	27.399	163.54
tr|A0A6A4KPL6|A0A6A4KPL6_9ERIC	tr|A0A6A4KPL6|A0A6A4KPL6_9ERIC Phosphoglycerate kinase (Fragment) OS=Rhododendron williamsianum OX=262921 GN=C3L33_22991 PE=3 SV=1	25.1684	25.2251	24.2415	24.88	24.6282	25.2126	76.481	163.51
tr|A0A6A4KRB6|A0A6A4KRB6_9ERIC;tr|A0A834GYN0|A0A834GYN0_RHOSS	tr|A0A6A4KRB6|A0A6A4KRB6_9ERIC Uncharacterized protein (Fragment) OS=Rhododendron williamsianum OX=262921 GN=C3L33_19823 PE=4 SV=1;tr|A0A834GYN0|A0A834GYN0_RHOSS Uncharacterized protein OS=Rhododendron simsii OX=118357 GN=RHSIM_Rhsim05G0069700 PE=4 SV=1	27.6413	26.1833	28.2989	27.958	27.3767	27.2749	144.49	161.86
tr|A0A6A4MFR9|A0A6A4MFR9_9ERIC;tr|A0A834LH06|A0A834LH06_RHOSS;tr|A0A6A4KWV1|A0A6A4KWV1_9ERIC;tr|A0A834LA70|A0A834LA70_RHOSS	tr|A0A6A4MFR9|A0A6A4MFR9_9ERIC UTP--glucose-1-phosphate uridylyltransferase (Fragment) OS=Rhododendron williamsianum OX=262921 GN=C3L33_01816 PE=3 SV=1;tr|A0A834LH06|A0A834LH06_RHOSS UTP--glucose-1-phosphate uridylyltransferase OS=Rhododendron simsii OX=11	25.554	26.3138	25.1186	25.5273	25.35	25.2757	64.168	161.31
tr|A0A6A4L3X7|A0A6A4L3X7_9ERIC	tr|A0A6A4L3X7|A0A6A4L3X7_9ERIC Fructose-bisphosphate aldolase (Fragment) OS=Rhododendron williamsianum OX=262921 GN=C3L33_13780 PE=3 SV=1	26.2296	NaN	NaN	24.7807	24.7864	24.8851	37.859	160.87
tr|A0A6A4MCT2|A0A6A4MCT2_9ERIC;tr|A0A6A4M6I6|A0A6A4M6I6_9ERIC;tr|A0A6A4KHV6|A0A6A4KHV6_9ERIC	tr|A0A6A4MCT2|A0A6A4MCT2_9ERIC Succinate dehydrogenase (quinone) (Fragment) OS=Rhododendron williamsianum OX=262921 GN=C3L33_01129 PE=3 SV=1	26.4649	25.9975	27.1626	26.9781	27.1999	26.8854	72.2	160.6
tr|A0A834G575|A0A834G575_RHOSS;tr|A0A6A4KV52|A0A6A4KV52_9ERIC	tr|A0A834G575|A0A834G575_RHOSS S-adenosylmethionine synthase OS=Rhododendron simsii OX=118357 GN=RHSIM_Rhsim11G0100300 PE=3 SV=1	27.0137	27.4706	26.9736	27.9568	27.4122	27.8405	43.439	159.96
tr|A0A6A4LGF2|A0A6A4LGF2_9ERIC;tr|A0A834L741|A0A834L741_RHOSS	tr|A0A6A4LGF2|A0A6A4LGF2_9ERIC Uncharacterized protein (Fragment) OS=Rhododendron williamsianum OX=262921 GN=C3L33_13738 PE=3 SV=1;tr|A0A834L741|A0A834L741_RHOSS Uncharacterized protein OS=Rhododendron simsii OX=118357 GN=RHSIM_Rhsim12G0083200 PE=3 SV=1	26.0823	26.2187	26.2073	26.7247	27.067	27.1981	102.61	159.25
tr|A0A6A4M7F2|A0A6A4M7F2_9ERIC;tr|A0A834GHC0|A0A834GHC0_RHOSS	tr|A0A6A4M7F2|A0A6A4M7F2_9ERIC Formate dehydrogenase (Fragment) OS=Rhododendron williamsianum OX=262921 GN=C3L33_01595 PE=3 SV=1;tr|A0A834GHC0|A0A834GHC0_RHOSS Formate dehydrogenase, mitochondrial OS=Rhododendron simsii OX=118357 GN=RHSIM_Rhsim08G0055000 P	26.7767	26.9597	28.225	27.1617	26.7714	26.9278	43.058	155.5
tr|A0A834LBG0|A0A834LBG0_RHOSS;tr|A0A6A4L5C0|A0A6A4L5C0_9ERIC;tr|A0A834GA42|A0A834GA42_RHOSS;tr|A0A6A4KRD5|A0A6A4KRD5_9ERIC	tr|A0A834LBG0|A0A834LBG0_RHOSS Uncharacterized protein OS=Rhododendron simsii OX=118357 GN=RHSIM_Rhsim10G0186400 PE=3 SV=1;tr|A0A6A4L5C0|A0A6A4L5C0_9ERIC Uncharacterized protein (Fragment) OS=Rhododendron williamsianum OX=262921 GN=C3L33_17935 PE=3 SV=1;tr	26.4601	26.8582	26.9239	26.7669	26.6051	26.7321	81.354	154.74
tr|A0A834FZR7|A0A834FZR7_RHOSS;tr|A0A6A4LZ25|A0A6A4LZ25_9ERIC;tr|A0A834L217|A0A834L217_RHOSS	tr|A0A834FZR7|A0A834FZR7_RHOSS Aminomethyltransferase OS=Rhododendron simsii OX=118357 GN=RHSIM_Rhsim13G0152700 PE=3 SV=1;tr|A0A6A4LZ25|A0A6A4LZ25_9ERIC Uncharacterized protein (Fragment) OS=Rhododendron williamsianum OX=262921 GN=C3L33_06430 PE=3 SV=1;tr|	27.0549	27.145	27.0707	27.403	26.2468	26.4564	44.458	154.49
tr|A0A834GK15|A0A834GK15_RHOSS;tr|A0A834GN50|A0A834GN50_RHOSS;tr|A0A6A4MKJ0|A0A6A4MKJ0_9ERIC;tr|A0A834L8L5|A0A834L8L5_RHOSS;tr|A0A6A4L7V0|A0A6A4L7V0_9ERIC;tr|B6E2B5|B6E2B5_VACCO	tr|A0A834GK15|A0A834GK15_RHOSS Epimerase domain-containing protein OS=Rhododendron simsii OX=118357 GN=RHSIM_Rhsim08G0207100 PE=4 SV=1;tr|A0A834GN50|A0A834GN50_RHOSS Epimerase domain-containing protein OS=Rhododendron simsii OX=118357 GN=RHSIM_Rhsim08G0206	NaN	NaN	NaN	NaN	24.8318	25.0492	29.713	153.64
tr|A0A834HG31|A0A834HG31_RHOSS;tr|A0A6A4M105|A0A6A4M105_9ERIC;tr|A0A834LJJ4|A0A834LJJ4_RHOSS	tr|A0A834HG31|A0A834HG31_RHOSS AAA domain-containing protein OS=Rhododendron simsii OX=118357 GN=RHSIM_Rhsim02G0193400 PE=3 SV=1;tr|A0A6A4M105|A0A6A4M105_9ERIC AAA domain-containing protein (Fragment) OS=Rhododendron williamsianum OX=262921 GN=C3L33_07818	26.3017	26.1218	NaN	25.4453	26.3928	26.4357	51.782	151.09
tr|A0A6A4LV24|A0A6A4LV24_9ERIC;tr|A0A6H0F007|A0A6H0F007_9ERIC;tr|A0A834G0V8|A0A834G0V8_RHOSS;tr|A0A6H0EXT9|A0A6H0EXT9_9ERIC;tr|A0A834GZG3|A0A834GZG3_RHOSS;tr|A0A6H0EZL9|A0A6H0EZL9_9ERIC;tr|A0A6H0EZ87|A0A6H0EZ87_9ERIC;tr|A0A6H0F0G9|A0A6H0F0G9_9ERIC;tr|A0A6H0EZ99|A0A6H0EZ99_9ERIC;tr|G3BG27|G3BG27_9ERIC;tr|A0A6A4KXV0|A0A6A4KXV0_9ERIC;tr|A0A6H0EXU2|A0A6H0EXU2_9ERIC;tr|K4EK83|K4EK83_9ERIC;tr|K4EJU0|K4…	tr|A0A6A4LV24|A0A6A4LV24_9ERIC ATPase_AAA_core domain-containing protein (Fragment) OS=Rhododendron williamsianum OX=262921 GN=C3L33_07022 PE=3 SV=1;tr|A0A6H0F007|A0A6H0F007_9ERIC Chloroplast ribulose bisphosphate carboxylase/oxygenase activase 2 transcrip	27.7584	27.2119	25.1957	25.8919	25.9339	25.7438	51.542	150.92
tr|A0A834L7X1|A0A834L7X1_RHOSS;tr|A0A6A4LTZ2|A0A6A4LTZ2_9ERIC	tr|A0A834L7X1|A0A834L7X1_RHOSS FAD-binding PCMH-type domain-containing protein OS=Rhododendron simsii OX=118357 GN=RHSIM_Rhsim13G0123200 PE=3 SV=1	26.7474	26.5675	27.5101	26.9429	27.0493	27.157	59.316	144.8
tr|A0A6A4LP47|A0A6A4LP47_9ERIC;tr|A0A834GZZ4|A0A834GZZ4_RHOSS	tr|A0A6A4LP47|A0A6A4LP47_9ERIC Uncharacterized protein (Fragment) OS=Rhododendron williamsianum OX=262921 GN=C3L33_11753 PE=3 SV=1;tr|A0A834GZZ4|A0A834GZZ4_RHOSS Uncharacterized protein OS=Rhododendron simsii OX=118357 GN=RHSIM_Rhsim04G0029500 PE=3 SV=1	24.5794	25.8455	24.6856	25.0053	24.9544	24.7112	44.173	144.46
tr|A0A834HAL3|A0A834HAL3_RHOSS;tr|A0A6A4MCJ4|A0A6A4MCJ4_9ERIC;tr|A0A6A4KHK8|A0A6A4KHK8_9ERIC;tr|A0A6A4KQF1|A0A6A4KQF1_9ERIC;tr|B0FGG5|B0FGG5_VACCO;tr|A0A834L3X7|A0A834L3X7_RHOSS	tr|A0A834HAL3|A0A834HAL3_RHOSS Pyr_redox_2 domain-containing protein OS=Rhododendron simsii OX=118357 GN=RHSIM_Rhsim03G0078300 PE=4 SV=1;tr|A0A6A4MCJ4|A0A6A4MCJ4_9ERIC Pyr_redox_2 domain-containing protein (Fragment) OS=Rhododendron williamsianum OX=262921	NaN	NaN	NaN	NaN	27.527	27.6259	50.451	141.97
tr|A0A834GU39|A0A834GU39_RHOSS;tr|A0A6A4KVZ3|A0A6A4KVZ3_9ERIC;tr|A0A834HDL0|A0A834HDL0_RHOSS	tr|A0A834GU39|A0A834GU39_RHOSS Phosphoglycerate kinase OS=Rhododendron simsii OX=118357 GN=RHSIM_Rhsim05G0232900 PE=3 SV=1;tr|A0A6A4KVZ3|A0A6A4KVZ3_9ERIC Phosphoglycerate kinase (Fragment) OS=Rhododendron williamsianum OX=262921 GN=C3L33_20583 PE=3 SV=1	28.0179	28.5197	27.2584	NaN	28.0175	28.0655	42.447	141.95
tr|A0A834GT54|A0A834GT54_RHOSS;tr|A0A6A4KR64|A0A6A4KR64_9ERIC	tr|A0A834GT54|A0A834GT54_RHOSS Aspartate aminotransferase OS=Rhododendron simsii OX=118357 GN=RHSIM_Rhsim07G0162300 PE=3 SV=1;tr|A0A6A4KR64|A0A6A4KR64_9ERIC Aspartate aminotransferase (Fragment) OS=Rhododendron williamsianum OX=262921 GN=C3L33_22701 PE=3 S	26.6491	27.3509	NaN	27.3837	27.2623	27.326	57.39	141.27
tr|A0A834GN01|A0A834GN01_RHOSS;tr|A0A6A4M1C4|A0A6A4M1C4_9ERIC;tr|A0A6A4K6V9|A0A6A4K6V9_9ERIC	tr|A0A834GN01|A0A834GN01_RHOSS Uncharacterized protein OS=Rhododendron simsii OX=118357 GN=RHSIM_Rhsim08G0129000 PE=3 SV=1;tr|A0A6A4M1C4|A0A6A4M1C4_9ERIC Uncharacterized protein (Fragment) OS=Rhododendron williamsianum OX=262921 GN=C3L33_01014 PE=3 SV=1	25.943	25.1599	24.7187	25.3709	24.4353	NaN	34.911	140.52
tr|A0A6A4L2U8|A0A6A4L2U8_9ERIC;tr|A0A834HCM7|A0A834HCM7_RHOSS	tr|A0A6A4L2U8|A0A6A4L2U8_9ERIC Uncharacterized protein (Fragment) OS=Rhododendron williamsianum OX=262921 GN=C3L33_15673 PE=4 SV=1;tr|A0A834HCM7|A0A834HCM7_RHOSS Obg-like ATPase 1 OS=Rhododendron simsii OX=118357 GN=RHSIM_Rhsim02G0162600 PE=3 SV=1	25.0503	26.0934	25.8644	25.9154	26.5047	26.5478	38.907	140.28
tr|A0A834LVL9|A0A834LVL9_RHOSS;tr|A0A834LFD5|A0A834LFD5_RHOSS;tr|A0A6A4KRP9|A0A6A4KRP9_9ERIC;tr|A0A6A4L6P5|A0A6A4L6P5_9ERIC;tr|A0A834G6W7|A0A834G6W7_RHOSS;tr|A0A6A4LPA6|A0A6A4LPA6_9ERIC;tr|A0A6A4M299|A0A6A4M299_9ERIC;tr|A0A834H0Q4|A0A834H0Q4_RHOSS;tr|A0A6A4KQ05|A0A6A4KQ05_9ERIC;tr|A0A6A4KUN6|A0A6A4KUN6_9ERIC	tr|A0A834LVL9|A0A834LVL9_RHOSS Uncharacterized protein OS=Rhododendron simsii OX=118357 GN=RHSIM_Rhsim01G0227200 PE=3 SV=1;tr|A0A834LFD5|A0A834LFD5_RHOSS Uncharacterized protein OS=Rhododendron simsii OX=118357 GN=RHSIM_Rhsim03G0130900 PE=3 SV=1;tr|A0A6A4K	26.506	26.9687	27.2549	27.363	27.5187	27.6413	41.656	139.99
tr|A0A834GSE0|A0A834GSE0_RHOSS;tr|A0A834LSV3|A0A834LSV3_RHOSS;tr|A0A834H3W3|A0A834H3W3_RHOSS;tr|A0A834G3R5|A0A834G3R5_RHOSS;tr|A0A834LMG5|A0A834LMG5_RHOSS;tr|A0A834FSZ1|A0A834FSZ1_RHOSS;tr|A0A834LIG9|A0A834LIG9_RHOSS;tr|A0A834LR59|A0A834LR59_RHOSS;tr|A0A834H2B7|A0A834H2B7_RHOSS;tr|A0A834G007|A0A834G007_RHOSS	tr|A0A834GSE0|A0A834GSE0_RHOSS Uncharacterized protein OS=Rhododendron simsii OX=118357 GN=RHSIM_Rhsim06G0241500 PE=4 SV=1;tr|A0A834LSV3|A0A834LSV3_RHOSS Ubiquitin-like domain-containing protein OS=Rhododendron simsii OX=118357 GN=RHSIM_Rhsim04G0245900 PE=	28.3138	27.0449	28.6462	28.3319	28.618	28.6688	17.122	136.34
tr|A0A834GT97|A0A834GT97_RHOSS;tr|A0A6A4LSX3|A0A6A4LSX3_9ERIC	tr|A0A834GT97|A0A834GT97_RHOSS Methyltransferase OS=Rhododendron simsii OX=118357 GN=RHSIM_Rhsim06G0080700 PE=3 SV=1;tr|A0A6A4LSX3|A0A6A4LSX3_9ERIC Methyltransferase (Fragment) OS=Rhododendron williamsianum OX=262921 GN=C3L33_10677 PE=3 SV=1	24.2577	NaN	24.0951	NaN	NaN	NaN	78.993	134.96
tr|A0A6A4M6I9|A0A6A4M6I9_9ERIC;tr|A0A834HJW7|A0A834HJW7_RHOSS	tr|A0A6A4M6I9|A0A6A4M6I9_9ERIC Uncharacterized protein (Fragment) OS=Rhododendron williamsianum OX=262921 GN=C3L33_04248 PE=3 SV=1;tr|A0A834HJW7|A0A834HJW7_RHOSS Uncharacterized protein OS=Rhododendron simsii OX=118357 GN=RHSIM_Rhsim01G0263200 PE=3 SV=1	29.0378	29.3089	29.9952	29.3963	30.1271	29.7325	55.392	134.25
tr|A0A834LH50|A0A834LH50_RHOSS;tr|A0A6A4KYV8|A0A6A4KYV8_9ERIC;tr|A0A834LF28|A0A834LF28_RHOSS;tr|A0A834LED3|A0A834LED3_RHOSS;tr|A0A834GDT5|A0A834GDT5_RHOSS;tr|A0A6A4LAD3|A0A6A4LAD3_9ERIC;tr|A0A6A4L2E8|A0A6A4L2E8_9ERIC;tr|A0A6A4K6H1|A0A6A4K6H1_9ERIC;tr|A0A834LE34|A0A834LE34_RHOSS;tr|A0A6A4LE65|A0A6A4LE65_9ERIC;tr|A0A834HAE0|A0A834HAE0_RHOSS;tr|A0A6A4KPN5|A0A6A4KPN5_9ERIC;tr|A0A6A4L8R3|A0A6A4L8R3_9E…	tr|A0A834LH50|A0A834LH50_RHOSS Acyl-[acyl-carrier-protein] desaturase OS=Rhododendron simsii OX=118357 GN=RHSIM_Rhsim09G0009000 PE=3 SV=1;tr|A0A6A4KYV8|A0A6A4KYV8_9ERIC Acyl-[acyl-carrier-protein] desaturase (Fragment) OS=Rhododendron williamsianum OX=2629	24.0067	22.6964	25.4453	24.7535	23.8829	24.1304	45.594	132.03
tr|A0A6A4LBB6|A0A6A4LBB6_9ERIC	tr|A0A6A4LBB6|A0A6A4LBB6_9ERIC Uncharacterized protein (Fragment) OS=Rhododendron williamsianum OX=262921 GN=C3L33_16054 PE=4 SV=1	26.989	25.3482	26.5637	25.9149	NaN	26.1372	97.754	128.24
tr|A0A834HFN0|A0A834HFN0_RHOSS;tr|A0A6A4LC41|A0A6A4LC41_9ERIC	tr|A0A834HFN0|A0A834HFN0_RHOSS Serine hydroxymethyltransferase OS=Rhododendron simsii OX=118357 GN=RHSIM_Rhsim02G0062000 PE=3 SV=1;tr|A0A6A4LC41|A0A6A4LC41_9ERIC Serine hydroxymethyltransferase (Fragment) OS=Rhododendron williamsianum OX=262921 GN=C3L33_15	25.8761	24.6882	25.9656	25.6477	25.1741	25.6374	52.015	128.08
tr|A0A6A4LWC5|A0A6A4LWC5_9ERIC;tr|I1U4L1|I1U4L1_9ERIC;tr|A0A834L8N7|A0A834L8N7_RHOSS;tr|A0A6A4L023|A0A6A4L023_9ERIC	tr|A0A6A4LWC5|A0A6A4LWC5_9ERIC Uncharacterized protein (Fragment) OS=Rhododendron williamsianum OX=262921 GN=C3L33_05743 PE=3 SV=1	25.5684	25.7854	23.17	24.7061	23.4655	23.5937	43.658	125.22
tr|A0A834G3A7|A0A834G3A7_RHOSS;tr|A0A6A4LFD6|A0A6A4LFD6_9ERIC;tr|A0A834H0E9|A0A834H0E9_RHOSS;tr|A0A6A4KXH4|A0A6A4KXH4_9ERIC;tr|A0A834LCG4|A0A834LCG4_RHOSS	tr|A0A834G3A7|A0A834G3A7_RHOSS Phosphoglycerate mutase (2,3-diphosphoglycerate-independent) OS=Rhododendron simsii OX=118357 GN=RHSIM_Rhsim12G0013400 PE=3 SV=1;tr|A0A6A4LFD6|A0A6A4LFD6_9ERIC Phosphoglycerate mutase (2,3-diphosphoglycerate-independent) (Fra	25.8474	25.7774	24.6492	25.3458	24.365	26.4135	61.193	124.81
tr|A0A834LB86|A0A834LB86_RHOSS;tr|A0A6A4KSS7|A0A6A4KSS7_9ERIC	tr|A0A834LB86|A0A834LB86_RHOSS Uncharacterized protein OS=Rhododendron simsii OX=118357 GN=RHSIM_Rhsim11G0160800 PE=3 SV=1;tr|A0A6A4KSS7|A0A6A4KSS7_9ERIC Uncharacterized protein (Fragment) OS=Rhododendron williamsianum OX=262921 GN=C3L33_20941 PE=3 SV=1	24.0007	NaN	23.2063	NaN	NaN	NaN	56.591	123.44
tr|A0A834HEW6|A0A834HEW6_RHOSS	tr|A0A834HEW6|A0A834HEW6_RHOSS Methenyltetrahydrofolate cyclohydrolase OS=Rhododendron simsii OX=118357 GN=RHSIM_Rhsim02G0054100 PE=3 SV=1	NaN	24.4514	NaN	23.5442	NaN	23.9389	41.638	122.83
tr|A0A6A4KNN8|A0A6A4KNN8_9ERIC	tr|A0A6A4KNN8|A0A6A4KNN8_9ERIC Carboxypeptidase (Fragment) OS=Rhododendron williamsianum OX=262921 GN=C3L33_20901 PE=3 SV=1	30.2163	30.2164	30.5785	30.6975	29.9607	30.3709	65.949	122.35
tr|A0A834LGT6|A0A834LGT6_RHOSS;tr|A0A6A4L3S3|A0A6A4L3S3_9ERIC;tr|A0A834HEP1|A0A834HEP1_RHOSS;tr|A0A834LEY6|A0A834LEY6_RHOSS	tr|A0A834LGT6|A0A834LGT6_RHOSS Phosphoglucomutase (alpha-D-glucose-1,6-bisphosphate-dependent) OS=Rhododendron simsii OX=118357 GN=RHSIM_Rhsim09G0093200 PE=3 SV=1;tr|A0A6A4L3S3|A0A6A4L3S3_9ERIC Phosphoglucomutase (alpha-D-glucose-1,6-bisphosphate-dependent	26.4689	25.9925	26.2095	26.2515	25.9477	26.9671	68.365	122.09
tr|A0A6A4LWX5|A0A6A4LWX5_9ERIC;tr|A0A834LXH2|A0A834LXH2_RHOSS;tr|A0A834GQF8|A0A834GQF8_RHOSS;tr|A0A6A4LGW8|A0A6A4LGW8_9ERIC;tr|A0A834LN28|A0A834LN28_RHOSS;tr|A0A834GSP6|A0A834GSP6_RHOSS;tr|A0A834GTZ9|A0A834GTZ9_RHOSS	tr|A0A6A4LWX5|A0A6A4LWX5_9ERIC Vacuolar proton pump subunit B (Fragment) OS=Rhododendron williamsianum OX=262921 GN=C3L33_05542 PE=3 SV=1;tr|A0A834LXH2|A0A834LXH2_RHOSS Uncharacterized protein OS=Rhododendron simsii OX=118357 GN=RHSIM_Rhsim01G0025200 PE=3	22.8411	NaN	NaN	NaN	24.0469	NaN	58.727	120.55
tr|A0A076NBT0|A0A076NBT0_VACCO	tr|A0A076NBT0|A0A076NBT0_VACCO O-methyltransferase OS=Vaccinium corymbosum OX=69266 PE=2 SV=1	24.3464	NaN	NaN	25.6548	24.6317	24.8541	40.33	120.19
tr|A0A6A4KS97|A0A6A4KS97_9ERIC;tr|A0A834LCS5|A0A834LCS5_RHOSS	tr|A0A6A4KS97|A0A6A4KS97_9ERIC Sucrose-phosphatase (Fragment) OS=Rhododendron williamsianum OX=262921 GN=C3L33_17623 PE=3 SV=1;tr|A0A834LCS5|A0A834LCS5_RHOSS Sucrose-phosphatase OS=Rhododendron simsii OX=118357 GN=RHSIM_Rhsim09G0022800 PE=3 SV=1	25.6568	24.6021	24.6866	25.347	24.758	24.1555	48.584	117.38
tr|A0A6A4L5U5|A0A6A4L5U5_9ERIC;tr|A0A834LFS1|A0A834LFS1_RHOSS	tr|A0A6A4L5U5|A0A6A4L5U5_9ERIC HATPase_c domain-containing protein (Fragment) OS=Rhododendron williamsianum OX=262921 GN=C3L33_16978 PE=3 SV=1;tr|A0A834LFS1|A0A834LFS1_RHOSS HATPase_c domain-containing protein OS=Rhododendron simsii OX=118357 GN=RHSIM_Rhsi	25.971	25.8099	25.888	26.2399	25.8011	25.7047	85.798	117.38
tr|A0A6A4LMC4|A0A6A4LMC4_9ERIC;tr|A0A834H278|A0A834H278_RHOSS	tr|A0A6A4LMC4|A0A6A4LMC4_9ERIC Acylaminoacyl-peptidase (Fragment) OS=Rhododendron williamsianum OX=262921 GN=C3L33_12332 PE=3 SV=1;tr|A0A834H278|A0A834H278_RHOSS Acylaminoacyl-peptidase OS=Rhododendron simsii OX=118357 GN=RHSIM_Rhsim04G0195100 PE=3 SV=1	26.4604	NaN	26.2066	25.8586	NaN	NaN	87.717	117.37
tr|A0A6A4MAB1|A0A6A4MAB1_9ERIC;tr|A0A834LZF6|A0A834LZF6_RHOSS	tr|A0A6A4MAB1|A0A6A4MAB1_9ERIC Uncharacterized protein (Fragment) OS=Rhododendron williamsianum OX=262921 GN=C3L33_04644 PE=3 SV=1;tr|A0A834LZF6|A0A834LZF6_RHOSS Uncharacterized protein OS=Rhododendron simsii OX=118357 GN=RHSIM_Rhsim01G0213500 PE=3 SV=1	24.4967	24.3067	NaN	23.9574	NaN	23.6403	62.037	115.95
tr|A0A6A4KYX0|A0A6A4KYX0_9ERIC;tr|A0A834FV85|A0A834FV85_RHOSS	tr|A0A6A4KYX0|A0A6A4KYX0_9ERIC Ribos_L4_asso_C domain-containing protein (Fragment) OS=Rhododendron williamsianum OX=262921 GN=C3L33_20208 PE=3 SV=1;tr|A0A834FV85|A0A834FV85_RHOSS Ribos_L4_asso_C domain-containing protein OS=Rhododendron simsii OX=118357 G	26.8229	26.0674	NaN	NaN	25.4921	25.2694	43.244	115.85
tr|A0A834L8V9|A0A834L8V9_RHOSS;tr|A0A6A4LJJ5|A0A6A4LJJ5_9ERIC	tr|A0A834L8V9|A0A834L8V9_RHOSS AP-1 complex subunit gamma OS=Rhododendron simsii OX=118357 GN=RHSIM_Rhsim12G0047900 PE=3 SV=1;tr|A0A6A4LJJ5|A0A6A4LJJ5_9ERIC GAE domain-containing protein (Fragment) OS=Rhododendron williamsianum OX=262921 GN=C3L33_13500 PE=	24.1909	23.9035	24.6915	24.4308	NaN	24.418	95.936	113.46
tr|A0A834HCN3|A0A834HCN3_RHOSS;tr|A0A6A4M889|A0A6A4M889_9ERIC	tr|A0A834HCN3|A0A834HCN3_RHOSS Alanine--tRNA ligase OS=Rhododendron simsii OX=118357 GN=RHSIM_Rhsim03G0224600 PE=3 SV=1;tr|A0A6A4M889|A0A6A4M889_9ERIC Alanine--tRNA ligase (Fragment) OS=Rhododendron williamsianum OX=262921 GN=C3L33_03490 PE=3 SV=1	23.4625	NaN	23.9939	NaN	NaN	NaN	124.27	112.83
tr|A0A1J0A0R5|A0A1J0A0R5_RHOML;tr|A0A6A4KZE7|A0A6A4KZE7_9ERIC;tr|A0A6A4KUY8|A0A6A4KUY8_9ERIC;tr|A0A834G7T5|A0A834G7T5_RHOSS;tr|A0A834LNA7|A0A834LNA7_RHOSS	tr|A0A1J0A0R5|A0A1J0A0R5_RHOML RPL3 OS=Rhododendron molle OX=49168 GN=RPL3 PE=2 SV=1;tr|A0A6A4KZE7|A0A6A4KZE7_9ERIC Uncharacterized protein (Fragment) OS=Rhododendron williamsianum OX=262921 GN=C3L33_19794 PE=3 SV=1;tr|A0A6A4KUY8|A0A6A4KUY8_9ERIC Uncharact	26.4521	25.5649	NaN	NaN	25.8038	NaN	44.42	112.59
tr|A0A834FVF5|A0A834FVF5_RHOSS;tr|A0A834LDX1|A0A834LDX1_RHOSS	tr|A0A834FVF5|A0A834FVF5_RHOSS Glucose-6-phosphate 1-dehydrogenase OS=Rhododendron simsii OX=118357 GN=RHSIM_RhsimUnG0241400 PE=3 SV=1;tr|A0A834LDX1|A0A834LDX1_RHOSS Glucose-6-phosphate 1-dehydrogenase OS=Rhododendron simsii OX=118357 GN=RHSIM_Rhsim10G0011	25.8597	25.7314	25.331	25.6563	24.1772	25.0965	59.291	111.36
tr|A0A6A4LXB5|A0A6A4LXB5_9ERIC	tr|A0A6A4LXB5|A0A6A4LXB5_9ERIC Aminotran_1_2 domain-containing protein (Fragment) OS=Rhododendron williamsianum OX=262921 GN=C3L33_08098 PE=3 SV=1	26.0274	26.0507	NaN	NaN	NaN	NaN	51.59	110.56
tr|A0A834HN43|A0A834HN43_RHOSS;tr|A0A6A4L9F4|A0A6A4L9F4_9ERIC;tr|A0A834G5A9|A0A834G5A9_RHOSS	tr|A0A834HN43|A0A834HN43_RHOSS Pyruvate kinase OS=Rhododendron simsii OX=118357 GN=RHSIM_Rhsim02G0031500 PE=3 SV=1;tr|A0A6A4L9F4|A0A6A4L9F4_9ERIC Pyruvate kinase (Fragment) OS=Rhododendron williamsianum OX=262921 GN=C3L33_15019 PE=3 SV=1	22.2915	22.458	NaN	NaN	NaN	NaN	62.929	109.8
tr|A0A6A4KSJ7|A0A6A4KSJ7_9ERIC;tr|A0A834GI64|A0A834GI64_RHOSS;tr|A0A0G3FEC2|A0A0G3FEC2_VACCO;tr|A0A8F5V7A4|A0A8F5V7A4_9ERIC	tr|A0A6A4KSJ7|A0A6A4KSJ7_9ERIC Fe2OG dioxygenase domain-containing protein (Fragment) OS=Rhododendron williamsianum OX=262921 GN=C3L33_22031 PE=3 SV=1;tr|A0A834GI64|A0A834GI64_RHOSS Fe2OG dioxygenase domain-containing protein OS=Rhododendron simsii OX=1183	NaN	NaN	NaN	NaN	25.5416	25.2302	42.587	109.73
tr|A0A834L814|A0A834L814_RHOSS;tr|A0A834G1P2|A0A834G1P2_RHOSS	tr|A0A834L814|A0A834L814_RHOSS Aldehyde dehydrogenase (NAD(+)) OS=Rhododendron simsii OX=118357 GN=RHSIM_Rhsim12G0211100 PE=3 SV=1;tr|A0A834G1P2|A0A834G1P2_RHOSS Aldehyde dehydrogenase (NAD(+)) OS=Rhododendron simsii OX=118357 GN=RHSIM_Rhsim12G0210700 PE=3	25.9853	26.4993	NaN	25.6251	25.5327	25.7046	54.735	109.46
tr|A0A6A4LSR1|A0A6A4LSR1_9ERIC	tr|A0A6A4LSR1|A0A6A4LSR1_9ERIC Uncharacterized protein (Fragment) OS=Rhododendron williamsianum OX=262921 GN=C3L33_04118 PE=4 SV=1	26.8123	26.7867	27.7366	27.5003	28.1873	28.36	72.19	108.89
tr|A0A834G8Y2|A0A834G8Y2_RHOSS;tr|A0A6A4L2V2|A0A6A4L2V2_9ERIC;tr|A0A6A4L3I7|A0A6A4L3I7_9ERIC;tr|A0A834LEQ5|A0A834LEQ5_RHOSS;REV__tr|A0A834L8L2|A0A834L8L2_RHOSS;REV__tr|A0A6A4LGN9|A0A6A4LGN9_9ERIC	tr|A0A834G8Y2|A0A834G8Y2_RHOSS Glutamate decarboxylase OS=Rhododendron simsii OX=118357 GN=RHSIM_Rhsim10G0183700 PE=3 SV=1;tr|A0A6A4L2V2|A0A6A4L2V2_9ERIC Glutamate decarboxylase (Fragment) OS=Rhododendron williamsianum OX=262921 GN=C3L33_17969 PE=3 SV=1	26.1625	26.3197	25.9237	25.6216	26.1362	25.8477	54.997	108.35
tr|A0A6A4L4C5|A0A6A4L4C5_9ERIC;tr|A0A834GJ52|A0A834GJ52_RHOSS	tr|A0A6A4L4C5|A0A6A4L4C5_9ERIC Phosphoenolpyruvate carboxylase (Fragment) OS=Rhododendron williamsianum OX=262921 GN=C3L33_17031 PE=3 SV=1;tr|A0A834GJ52|A0A834GJ52_RHOSS Phosphoenolpyruvate carboxylase OS=Rhododendron simsii OX=118357 GN=RHSIM_Rhsim09G0114	25.1401	NaN	24.2285	24.4378	24.0055	24.5158	115.07	107.13
tr|A0A834GA44|A0A834GA44_RHOSS;tr|A0A6A4L2U1|A0A6A4L2U1_9ERIC;tr|A0A834GFV8|A0A834GFV8_RHOSS	tr|A0A834GA44|A0A834GA44_RHOSS ATP synthase subunit beta OS=Rhododendron simsii OX=118357 GN=RHSIM_Rhsim10G0077400 PE=3 SV=1;tr|A0A6A4L2U1|A0A6A4L2U1_9ERIC ATP synthase subunit beta (Fragment) OS=Rhododendron williamsianum OX=262921 GN=C3L33_18617 PE=3 SV=	NaN	23.8441	NaN	NaN	25.1551	NaN	59.124	106.26
tr|A0A834GKP0|A0A834GKP0_RHOSS;tr|A0A6A4LHR3|A0A6A4LHR3_9ERIC;tr|A0A834HK56|A0A834HK56_RHOSS;tr|A0A6A4MAG6|A0A6A4MAG6_9ERIC	tr|A0A834GKP0|A0A834GKP0_RHOSS Protein kinase domain-containing protein OS=Rhododendron simsii OX=118357 GN=RHSIM_Rhsim07G0011800 PE=3 SV=1;tr|A0A6A4LHR3|A0A6A4LHR3_9ERIC Protein kinase domain-containing protein (Fragment) OS=Rhododendron williamsianum OX=	24.4233	24.657	25.2483	24.1657	23.5849	24.1075	45.417	104.45
tr|A0A834LZ41|A0A834LZ41_RHOSS;tr|A0A6A4M9V2|A0A6A4M9V2_9ERIC;tr|A0A834HV20|A0A834HV20_RHOSS;tr|A0A6A4M7G6|A0A6A4M7G6_9ERIC;tr|A0A6A4M1L9|A0A6A4M1L9_9ERIC;tr|A0A6A4KJ53|A0A6A4KJ53_9ERIC;tr|A0A834HBP1|A0A834HBP1_RHOSS	tr|A0A834LZ41|A0A834LZ41_RHOSS Uncharacterized protein OS=Rhododendron simsii OX=118357 GN=RHSIM_Rhsim01G0196200 PE=3 SV=1;tr|A0A6A4M9V2|A0A6A4M9V2_9ERIC Uncharacterized protein (Fragment) OS=Rhododendron williamsianum OX=262921 GN=C3L33_04792 PE=3 SV=1;tr	24.7248	NaN	24.6069	NaN	NaN	NaN	102.43	103.55
tr|A0A6A4LIB4|A0A6A4LIB4_9ERIC;tr|A0A834G2S7|A0A834G2S7_RHOSS	tr|A0A6A4LIB4|A0A6A4LIB4_9ERIC Uncharacterized protein (Fragment) OS=Rhododendron williamsianum OX=262921 GN=C3L33_13953 PE=3 SV=1	26.8606	28.0061	24.9671	28.4664	27.8765	27.5399	43.025	103.23
tr|A0A834GQ77|A0A834GQ77_RHOSS;tr|A0A6A4LHI9|A0A6A4LHI9_9ERIC	tr|A0A834GQ77|A0A834GQ77_RHOSS Pyrophosphate--fructose 6-phosphate 1-phosphotransferase subunit alpha OS=Rhododendron simsii OX=118357 GN=PFP-ALPHA PE=3 SV=1	24.3915	24.0206	NaN	24.0584	NaN	25.3814	66.582	100.95
tr|A0A834H9N1|A0A834H9N1_RHOSS;tr|A0A6A4MDE0|A0A6A4MDE0_9ERIC	tr|A0A834H9N1|A0A834H9N1_RHOSS Uncharacterized protein OS=Rhododendron simsii OX=118357 GN=RHSIM_Rhsim03G0022100 PE=4 SV=1;tr|A0A6A4MDE0|A0A6A4MDE0_9ERIC Uncharacterized protein (Fragment) OS=Rhododendron williamsianum OX=262921 GN=C3L33_02043 PE=4 SV=1	24.2433	NaN	23.9416	NaN	NaN	NaN	60.407	98.94
tr|A0A834G500|A0A834G500_RHOSS;tr|A0A6A4L8T9|A0A6A4L8T9_9ERIC;tr|A0A6A4L2V9|A0A6A4L2V9_9ERIC;tr|A0A834G4S9|A0A834G4S9_RHOSS	tr|A0A834G500|A0A834G500_RHOSS Pyruvate dehydrogenase E1 component subunit alpha OS=Rhododendron simsii OX=118357 GN=RHSIM_Rhsim12G0052000 PE=4 SV=1;tr|A0A6A4L8T9|A0A6A4L8T9_9ERIC E1_dh domain-containing protein (Fragment) OS=Rhododendron williamsianum OX=	24.5644	25.1471	23.1966	25.1862	24.9056	25.1191	46.712	96.61
tr|A0A834LMS1|A0A834LMS1_RHOSS;tr|A0A6A4LKJ1|A0A6A4LKJ1_9ERIC;tr|A0A834LRD6|A0A834LRD6_RHOSS;tr|A0A834H544|A0A834H544_RHOSS;tr|A0A6A4LPW5|A0A6A4LPW5_9ERIC	tr|A0A834LMS1|A0A834LMS1_RHOSS Tryptophan synthase OS=Rhododendron simsii OX=118357 GN=RHSIM_Rhsim06G0214300 PE=3 SV=1;tr|A0A6A4LKJ1|A0A6A4LKJ1_9ERIC Tryptophan synthase (Fragment) OS=Rhododendron williamsianum OX=262921 GN=C3L33_09880 PE=3 SV=1;tr|A0A834L	NaN	NaN	NaN	23.5426	NaN	24.0218	44.435	96.159
tr|A0A834GJX6|A0A834GJX6_RHOSS;tr|A0A834FV17|A0A834FV17_RHOSS;tr|A0A834GI92|A0A834GI92_RHOSS	tr|A0A834GJX6|A0A834GJX6_RHOSS Uncharacterized protein OS=Rhododendron simsii OX=118357 GN=RHSIM_Rhsim08G0192300 PE=3 SV=1;tr|A0A834FV17|A0A834FV17_RHOSS Uncharacterized protein OS=Rhododendron simsii OX=118357 GN=RHSIM_RhsimUnG0162400 PE=3 SV=1;tr|A0A834G	NaN	NaN	NaN	NaN	26.1659	26.143	35.825	94.733
tr|A0A834LIZ7|A0A834LIZ7_RHOSS;tr|A0A6A4LU60|A0A6A4LU60_9ERIC	tr|A0A834LIZ7|A0A834LIZ7_RHOSS Peptidase A1 domain-containing protein OS=Rhododendron simsii OX=118357 GN=RHSIM_Rhsim07G0067500 PE=3 SV=1;tr|A0A6A4LU60|A0A6A4LU60_9ERIC Peptidase A1 domain-containing protein (Fragment) OS=Rhododendron williamsianum OX=2629	26.165	27.8626	NaN	27.458	26.5785	26.3701	47.472	94.104
tr|A0A6A4L0A7|A0A6A4L0A7_9ERIC;tr|A0A834LFR9|A0A834LFR9_RHOSS	tr|A0A6A4L0A7|A0A6A4L0A7_9ERIC W2 domain-containing protein (Fragment) OS=Rhododendron williamsianum OX=262921 GN=C3L33_16910 PE=3 SV=1;tr|A0A834LFR9|A0A834LFR9_RHOSS W2 domain-containing protein OS=Rhododendron simsii OX=118357 GN=RHSIM_Rhsim09G0130400 PE	NaN	22.6187	NaN	22.2461	23.259	NaN	53.667	93.468
tr|A0A6A4KYB1|A0A6A4KYB1_9ERIC;tr|A0A834LFX9|A0A834LFX9_RHOSS;tr|A0A834GDU7|A0A834GDU7_RHOSS;tr|A0A834GB03|A0A834GB03_RHOSS;tr|A0A6A4KR19|A0A6A4KR19_9ERIC	tr|A0A6A4KYB1|A0A6A4KYB1_9ERIC Guanosine nucleotide diphosphate dissociation inhibitor (Fragment) OS=Rhododendron williamsianum OX=262921 GN=C3L33_17587 PE=3 SV=1;tr|A0A834LFX9|A0A834LFX9_RHOSS Guanosine nucleotide diphosphate dissociation inhibitor OS=Rho	24.92	25.0632	24.8064	24.3535	24.1348	24.7876	46.155	91.488
tr|A0A834LPW2|A0A834LPW2_RHOSS;tr|A0A6A4LBQ1|A0A6A4LBQ1_9ERIC;tr|A0A6A4M5R7|A0A6A4M5R7_9ERIC;tr|A0A834H3Q3|A0A834H3Q3_RHOSS;tr|A0A6A4M5X1|A0A6A4M5X1_9ERIC;tr|A0A834FWW1|A0A834FWW1_RHOSS;tr|A0A834GCH4|A0A834GCH4_RHOSS	tr|A0A834LPW2|A0A834LPW2_RHOSS Pyruvate kinase OS=Rhododendron simsii OX=118357 GN=RHSIM_Rhsim04G0136600 PE=3 SV=1;tr|A0A6A4LBQ1|A0A6A4LBQ1_9ERIC Pyruvate kinase (Fragment) OS=Rhododendron williamsianum OX=262921 GN=C3L33_12355 PE=3 SV=1;tr|A0A6A4M5R7|A0A6	21.4221	22.2764	22.5772	NaN	23.4424	22.0894	57.496	91.155
tr|A0A834LM48|A0A834LM48_RHOSS;tr|A0A6A4KXD8|A0A6A4KXD8_9ERIC;tr|A0A834GX97|A0A834GX97_RHOSS;tr|A0A6A4LFE7|A0A6A4LFE7_9ERIC;tr|A0A834GXP5|A0A834GXP5_RHOSS	tr|A0A834LM48|A0A834LM48_RHOSS Asparagine--tRNA ligase OS=Rhododendron simsii OX=118357 GN=RHSIM_Rhsim05G0030300 PE=3 SV=1	25.682	NaN	25.894	25.2902	25.4214	25.7558	63.524	90.96
tr|A0A6A4LKF0|A0A6A4LKF0_9ERIC;tr|A0A834GLB4|A0A834GLB4_RHOSS	tr|A0A6A4LKF0|A0A6A4LKF0_9ERIC Peptidase A1 domain-containing protein (Fragment) OS=Rhododendron williamsianum OX=262921 GN=C3L33_09234 PE=3 SV=1;tr|A0A834GLB4|A0A834GLB4_RHOSS Peptidase A1 domain-containing protein OS=Rhododendron simsii OX=118357 GN=RHSI	26.7462	27.1142	27.9137	27.7712	28.7287	28.3323	41.749	87.88
tr|A0A6A4MB24|A0A6A4MB24_9ERIC;tr|A0A834LV54|A0A834LV54_RHOSS	tr|A0A6A4MB24|A0A6A4MB24_9ERIC Peptidylprolyl isomerase (Fragment) OS=Rhododendron williamsianum OX=262921 GN=C3L33_04382 PE=4 SV=1;tr|A0A834LV54|A0A834LV54_RHOSS Peptidylprolyl isomerase OS=Rhododendron simsii OX=118357 GN=RHSIM_Rhsim01G0249900 PE=4 SV=1	24.7256	24.5481	23.0479	24.2244	NaN	25.2264	64.016	87.365
tr|A0A834LUR2|A0A834LUR2_RHOSS;tr|A0A6A4MBT2|A0A6A4MBT2_9ERIC;tr|A0A834HJL8|A0A834HJL8_RHOSS;tr|A0A6A4M776|A0A6A4M776_9ERIC	tr|A0A834LUR2|A0A834LUR2_RHOSS 60S ribosomal protein L13 OS=Rhododendron simsii OX=118357 GN=RHSIM_Rhsim03G0219500 PE=3 SV=1;tr|A0A6A4MBT2|A0A6A4MBT2_9ERIC 60S ribosomal protein L13 (Fragment) OS=Rhododendron williamsianum OX=262921 GN=C3L33_03444 PE=3 SV=	23.4936	24.1893	23.5267	NaN	NaN	24.0557	23.861	87.053
tr|A0A834LWL5|A0A834LWL5_RHOSS;tr|A0A6A4LZ88|A0A6A4LZ88_9ERIC;tr|A0A834HC70|A0A834HC70_RHOSS;tr|A0A834HAD9|A0A834HAD9_RHOSS;tr|A0A1J0A0N4|A0A1J0A0N4_RHOML;tr|I1U4K9|I1U4K9_9ERIC;tr|A0A834H8C8|A0A834H8C8_RHOSS;tr|A0A834H9L9|A0A834H9L9_RHOSS;tr|A0A6A4LDX6|A0A6A4LDX6_9ERIC;tr|A0A6A4LMP1|A0A6A4LMP1_9ERIC;tr|A0A6A4KZH1|A0A6A4KZH1_9ERIC;tr|A0A6A4L8Z0|A0A6A4L8Z0_9ERIC;tr|A0A6A4MBW9|A0A6A4MBW9_9ERIC	tr|A0A834LWL5|A0A834LWL5_RHOSS Elongation factor 1-alpha OS=Rhododendron simsii OX=118357 GN=RHSIM_Rhsim01G0219100 PE=3 SV=1;tr|A0A6A4LZ88|A0A6A4LZ88_9ERIC Elongation factor 1-alpha (Fragment) OS=Rhododendron williamsianum OX=262921 GN=C3L33_04637 PE=3 SV=	28.2765	27.912	27.3664	27.6712	27.4272	27.2578	49.484	86.411
tr|A0A6A4M707|A0A6A4M707_9ERIC;tr|A0A834GJU7|A0A834GJU7_RHOSS;tr|A0A834GP77|A0A834GP77_RHOSS;tr|A0A834GM52|A0A834GM52_RHOSS	tr|A0A6A4M707|A0A6A4M707_9ERIC DHQ_synthase domain-containing protein (Fragment) OS=Rhododendron williamsianum OX=262921 GN=C3L33_01726 PE=3 SV=1;tr|A0A834GJU7|A0A834GJU7_RHOSS DHQ_synthase domain-containing protein OS=Rhododendron simsii OX=118357 GN=RHSI	NaN	NaN	NaN	NaN	24.0928	23.9767	45.566	86.376
tr|A0A834LDN9|A0A834LDN9_RHOSS;tr|A0A6A4L0U5|A0A6A4L0U5_9ERIC	tr|A0A834LDN9|A0A834LDN9_RHOSS PKS_ER domain-containing protein OS=Rhododendron simsii OX=118357 GN=RHSIM_Rhsim09G0195700 PE=3 SV=1	27.8759	27.7624	28.4481	27.4656	26.5217	26.5629	38.979	86.017
tr|A0A6A4LM51|A0A6A4LM51_9ERIC;tr|A0A834FZE9|A0A834FZE9_RHOSS	tr|A0A6A4LM51|A0A6A4LM51_9ERIC Pectin acetylesterase (Fragment) OS=Rhododendron williamsianum OX=262921 GN=C3L33_08971 PE=3 SV=1	26.1084	26.7882	26.0775	26.5241	26.2186	26.6562	33.959	84.22
tr|A0A834FWC3|A0A834FWC3_RHOSS;tr|A0A6A4KUJ9|A0A6A4KUJ9_9ERIC	tr|A0A834FWC3|A0A834FWC3_RHOSS Aminotran_1_2 domain-containing protein OS=Rhododendron simsii OX=118357 GN=RHSIM_RhsimUnG0094700 PE=4 SV=1;tr|A0A6A4KUJ9|A0A6A4KUJ9_9ERIC Aminotran_1_2 domain-containing protein (Fragment) OS=Rhododendron williamsianum OX=26	24.8606	25.0534	NaN	25.4769	25.1409	25.425	48.996	84.157
tr|A0A834G7L1|A0A834G7L1_RHOSS	tr|A0A834G7L1|A0A834G7L1_RHOSS Fructose-bisphosphate aldolase OS=Rhododendron simsii OX=118357 GN=RHSIM_Rhsim11G0183800 PE=3 SV=1	28.8926	27.877	28.0517	27.015	26.8077	26.8442	41.983	83.78
tr|A0A834H8M9|A0A834H8M9_RHOSS;tr|A0A6A4LMW5|A0A6A4LMW5_9ERIC	tr|A0A834H8M9|A0A834H8M9_RHOSS Fructose-bisphosphate aldolase OS=Rhododendron simsii OX=118357 GN=RHSIM_Rhsim04G0009800 PE=3 SV=1	28.676	29.7214	NaN	NaN	29.3058	29.7276	38.393	83.71
tr|A0A834GV24|A0A834GV24_RHOSS	tr|A0A834GV24|A0A834GV24_RHOSS Peptidase_S9 domain-containing protein OS=Rhododendron simsii OX=118357 GN=RHSIM_Rhsim06G0046300 PE=4 SV=1	24.4732	25.7757	25.7074	NaN	NaN	25.1171	86.402	83.377
tr|A0A834G776|A0A834G776_RHOSS;tr|A0A6A4LI37|A0A6A4LI37_9ERIC	tr|A0A834G776|A0A834G776_RHOSS Tryptophanyl-tRNA synthetase OS=Rhododendron simsii OX=118357 GN=RHSIM_Rhsim12G0003500 PE=3 SV=1;tr|A0A6A4LI37|A0A6A4LI37_9ERIC Tryptophanyl-tRNA synthetase (Fragment) OS=Rhododendron williamsianum OX=262921 GN=C3L33_13173 PE	24.4711	23.8361	NaN	NaN	NaN	23.4919	50.738	83.34
tr|A0A834LA35|A0A834LA35_RHOSS;tr|A0A6A4LD56|A0A6A4LD56_9ERIC;tr|A0A6A4KP57|A0A6A4KP57_9ERIC	tr|A0A834LA35|A0A834LA35_RHOSS Uncharacterized protein OS=Rhododendron simsii OX=118357 GN=RHSIM_Rhsim12G0136400 PE=3 SV=1;tr|A0A6A4LD56|A0A6A4LD56_9ERIC Uncharacterized protein (Fragment) OS=Rhododendron williamsianum OX=262921 GN=C3L33_14136 PE=3 SV=1	24.791	NaN	24.1758	24.8771	26.3011	24.8929	123.03	82.898
tr|A0A834H781|A0A834H781_RHOSS;tr|A0A834LIJ6|A0A834LIJ6_RHOSS;tr|A0A6A4LEN1|A0A6A4LEN1_9ERIC;tr|A0A834GU17|A0A834GU17_RHOSS;tr|A0A834GWM7|A0A834GWM7_RHOSS;tr|A0A834GB27|A0A834GB27_RHOSS;tr|A0A6A4L1U1|A0A6A4L1U1_9ERIC	tr|A0A834H781|A0A834H781_RHOSS Aldedh domain-containing protein OS=Rhododendron simsii OX=118357 GN=RHSIM_Rhsim03G0256500 PE=3 SV=1;tr|A0A834LIJ6|A0A834LIJ6_RHOSS Aldedh domain-containing protein OS=Rhododendron simsii OX=118357 GN=RHSIM_Rhsim07G0163900 PE	24.2559	24.0889	NaN	NaN	24.4369	NaN	53.115	82.404
tr|A0A834H419|A0A834H419_RHOSS;tr|A0A6A4MEE4|A0A6A4MEE4_9ERIC	tr|A0A834H419|A0A834H419_RHOSS Malate dehydrogenase [NADP], chloroplastic OS=Rhododendron simsii OX=118357 GN=RHSIM_Rhsim03G0111900 PE=3 SV=1	NaN	NaN	25.0592	25.119	24.5756	23.9461	47.841	81.843
tr|A0A6A4MJ14|A0A6A4MJ14_9ERIC;tr|A0A834LXI1|A0A834LXI1_RHOSS	tr|A0A6A4MJ14|A0A6A4MJ14_9ERIC Uncharacterized protein (Fragment) OS=Rhododendron williamsianum OX=262921 GN=C3L33_02156 PE=3 SV=1	NaN	NaN	NaN	25.746	26.2505	26.3573	142.66	81.34
tr|A0A6A4LY36|A0A6A4LY36_9ERIC;tr|A0A834HG76|A0A834HG76_RHOSS;tr|A0A6A4L9J2|A0A6A4L9J2_9ERIC;tr|A0A834H1R6|A0A834H1R6_RHOSS	tr|A0A6A4LY36|A0A6A4LY36_9ERIC RRM domain-containing protein (Fragment) OS=Rhododendron williamsianum OX=262921 GN=C3L33_05083 PE=3 SV=1;tr|A0A834HG76|A0A834HG76_RHOSS RRM domain-containing protein OS=Rhododendron simsii OX=118357 GN=RHSIM_Rhsim01G0145200	NaN	NaN	24.6035	NaN	25.1024	24.3378	82.009	80.614
tr|A0A834LHP6|A0A834LHP6_RHOSS;tr|A0A6A4MLR0|A0A6A4MLR0_9ERIC	tr|A0A834LHP6|A0A834LHP6_RHOSS Isocitrate dehydrogenase [NADP] OS=Rhododendron simsii OX=118357 GN=RHSIM_Rhsim08G0052400 PE=3 SV=1;tr|A0A6A4MLR0|A0A6A4MLR0_9ERIC Isocitrate dehydrogenase (NADP(+)) (Fragment) OS=Rhododendron williamsianum OX=262921 GN=C3L33	27.5027	26.8858	26.3954	27.159	27.3229	27.3204	53.248	78.7
tr|A0A6A4M353|A0A6A4M353_9ERIC;tr|A0A834LTR7|A0A834LTR7_RHOSS	tr|A0A6A4M353|A0A6A4M353_9ERIC Uncharacterized protein (Fragment) OS=Rhododendron williamsianum OX=262921 GN=C3L33_04247 PE=3 SV=1;tr|A0A834LTR7|A0A834LTR7_RHOSS Uncharacterized protein OS=Rhododendron simsii OX=118357 GN=RHSIM_Rhsim01G0263300 PE=3 SV=1	27.2147	27.6088	27.021	26.5683	27.4629	27.9779	51.618	78.31
tr|A0A834LKG0|A0A834LKG0_RHOSS;tr|A0A6A4LYY1|A0A6A4LYY1_9ERIC	tr|A0A834LKG0|A0A834LKG0_RHOSS Pyr_redox_2 domain-containing protein OS=Rhododendron simsii OX=118357 GN=RHSIM_Rhsim07G0087700 PE=4 SV=1;tr|A0A6A4LYY1|A0A6A4LYY1_9ERIC Pyr_redox_2 domain-containing protein (Fragment) OS=Rhododendron williamsianum OX=262921	24.6524	23.9531	NaN	NaN	23.54	23.3827	54.106	77.072
tr|A0A6A4LTT7|A0A6A4LTT7_9ERIC;tr|A0A834H780|A0A834H780_RHOSS	tr|A0A6A4LTT7|A0A6A4LTT7_9ERIC ECH_2 domain-containing protein (Fragment) OS=Rhododendron williamsianum OX=262921 GN=C3L33_03661 PE=4 SV=1;tr|A0A834H780|A0A834H780_RHOSS ECH_2 domain-containing protein OS=Rhododendron simsii OX=118357 GN=RHSIM_Rhsim03G0244	NaN	26.0395	NaN	NaN	NaN	25.8449	47.166	76.847
tr|A0A834LF82|A0A834LF82_RHOSS	tr|A0A834LF82|A0A834LF82_RHOSS Alpha-galactosidase OS=Rhododendron simsii OX=118357 GN=RHSIM_Rhsim09G0025700 PE=3 SV=1	NaN	NaN	24.9418	24.6902	25.0141	24.9291	44.831	75.619
tr|A0A834H2F3|A0A834H2F3_RHOSS;tr|A0A834LQI9|A0A834LQI9_RHOSS;tr|A0A6A4KVW0|A0A6A4KVW0_9ERIC;tr|A0A6A4L0K5|A0A6A4L0K5_9ERIC	tr|A0A834H2F3|A0A834H2F3_RHOSS Isoleucyl-tRNA synthetase OS=Rhododendron simsii OX=118357 GN=RHSIM_Rhsim05G0075700 PE=3 SV=1	26.2096	NaN	25.4309	25.9121	25.4	25.5824	144.02	75.214
tr|A0A834G7H2|A0A834G7H2_RHOSS;tr|A0A6A4M7V2|A0A6A4M7V2_9ERIC	tr|A0A834G7H2|A0A834G7H2_RHOSS Acyl-coenzyme A oxidase OS=Rhododendron simsii OX=118357 GN=RHSIM_Rhsim11G0003700 PE=3 SV=1;tr|A0A6A4M7V2|A0A6A4M7V2_9ERIC ACOX domain-containing protein (Fragment) OS=Rhododendron williamsianum OX=262921 GN=C3L33_05235 PE=3	23.696	24.8235	NaN	NaN	NaN	NaN	87.934	74.545
tr|A0A834GR00|A0A834GR00_RHOSS;tr|A0A6A4LHM4|A0A6A4LHM4_9ERIC	tr|A0A834GR00|A0A834GR00_RHOSS Malic enzyme OS=Rhododendron simsii OX=118357 GN=RHSIM_Rhsim07G0018800 PE=3 SV=1;tr|A0A6A4LHM4|A0A6A4LHM4_9ERIC Malic enzyme (Fragment) OS=Rhododendron williamsianum OX=262921 GN=C3L33_08008 PE=3 SV=1	23.8938	24.7253	NaN	24.2862	NaN	NaN	66.637	74.213
tr|A0A6A4LUE6|A0A6A4LUE6_9ERIC;tr|A0A834FYV5|A0A834FYV5_RHOSS;tr|A0A834FW55|A0A834FW55_RHOSS	tr|A0A6A4LUE6|A0A6A4LUE6_9ERIC Fumarylacetoacetase (Fragment) OS=Rhododendron williamsianum OX=262921 GN=C3L33_06478 PE=3 SV=1;tr|A0A834FYV5|A0A834FYV5_RHOSS Fumarylacetoacetase OS=Rhododendron simsii OX=118357 GN=RHSIM_Rhsim13G0146300 PE=3 SV=1;tr|A0A834F	26.5829	26.582	26.7684	26.7015	26.8032	26.4396	43.516	73.849
tr|A0A834LK28|A0A834LK28_RHOSS;tr|A0A834FZ38|A0A834FZ38_RHOSS;tr|A9ZMJ3|A9ZMJ3_9ERIC;tr|A0A385ZAE6|A0A385ZAE6_VACCO;tr|A0A6A4KPR3|A0A6A4KPR3_9ERIC	tr|A0A834LK28|A0A834LK28_RHOSS Fe2OG dioxygenase domain-containing protein OS=Rhododendron simsii OX=118357 GN=RHSIM_Rhsim07G0247500 PE=3 SV=1;tr|A0A834FZ38|A0A834FZ38_RHOSS Fe2OG dioxygenase domain-containing protein OS=Rhododendron simsii OX=118357 GN=RH	NaN	NaN	NaN	NaN	25.3374	25.178	40.553	72.396
tr|A0A834HND6|A0A834HND6_RHOSS;tr|A0A834H9C8|A0A834H9C8_RHOSS;tr|A0A6A4L8U0|A0A6A4L8U0_9ERIC	tr|A0A834HND6|A0A834HND6_RHOSS Protein kinase domain-containing protein OS=Rhododendron simsii OX=118357 GN=RHSIM_Rhsim02G0075300 PE=4 SV=1	NaN	NaN	24.1016	NaN	25.3997	25.2158	37.273	72.173
tr|A0A834LIC4|A0A834LIC4_RHOSS;tr|A0A6A4LZT4|A0A6A4LZT4_9ERIC	tr|A0A834LIC4|A0A834LIC4_RHOSS Transketolase OS=Rhododendron simsii OX=118357 GN=RHSIM_Rhsim07G0028800 PE=3 SV=1;tr|A0A6A4LZT4|A0A6A4LZT4_9ERIC Transketolase (Fragment) OS=Rhododendron williamsianum OX=262921 GN=C3L33_08092 PE=3 SV=1	25.2116	25.7736	25.545	NaN	NaN	24.5168	80.175	71.834
tr|A0A6A4L444|A0A6A4L444_9ERIC;tr|A0A834HBC9|A0A834HBC9_RHOSS;tr|A0A834LQ17|A0A834LQ17_RHOSS;tr|A0A834L9X3|A0A834L9X3_RHOSS;tr|A0A834GVA6|A0A834GVA6_RHOSS	tr|A0A6A4L444|A0A6A4L444_9ERIC Uncharacterized protein (Fragment) OS=Rhododendron williamsianum OX=262921 GN=C3L33_15155 PE=3 SV=1;tr|A0A834HBC9|A0A834HBC9_RHOSS Uncharacterized protein OS=Rhododendron simsii OX=118357 GN=RHSIM_Rhsim02G0053400 PE=3 SV=1	NaN	NaN	NaN	NaN	24.2151	24.0179	46.9	71.449
tr|A0A6A4LNT2|A0A6A4LNT2_9ERIC;tr|A0A834GKM5|A0A834GKM5_RHOSS;tr|A0A6A4MN10|A0A6A4MN10_9ERIC	tr|A0A6A4LNT2|A0A6A4LNT2_9ERIC PCI domain-containing protein (Fragment) OS=Rhododendron williamsianum OX=262921 GN=C3L33_11850 PE=4 SV=1;tr|A0A834GKM5|A0A834GKM5_RHOSS PCI domain-containing protein OS=Rhododendron simsii OX=118357 GN=RHSIM_Rhsim08G0185100	24.9233	25.9384	NaN	NaN	NaN	25.4214	44.32	70.849
tr|A0A6A4KG27|A0A6A4KG27_9ERIC;tr|A0A834G8B8|A0A834G8B8_RHOSS	tr|A0A6A4KG27|A0A6A4KG27_9ERIC Uncharacterized protein (Fragment) OS=Rhododendron williamsianum OX=262921 GN=C3L33_20790 PE=4 SV=1;tr|A0A834G8B8|A0A834G8B8_RHOSS Coatomer subunit alpha OS=Rhododendron simsii OX=118357 GN=RHSIM_Rhsim11G0182000 PE=4 SV=1	26.3161	26.0894	26.7705	26.85	26.6679	26.627	139.95	69.616
tr|A0A6A4KFZ4|A0A6A4KFZ4_9ERIC	tr|A0A6A4KFZ4|A0A6A4KFZ4_9ERIC D-fructose-1,6-bisphosphate 1-phosphohydrolase (Fragment) OS=Rhododendron williamsianum OX=262921 GN=C3L33_21108 PE=3 SV=1	21.7543	22.1723	NaN	21.4228	21.264	21.0011	43.319	67.513
tr|A0A834H854|A0A834H854_RHOSS;tr|A0A6A4LM55|A0A6A4LM55_9ERIC;tr|A0A834GXP6|A0A834GXP6_RHOSS;tr|A0A6A4KV13|A0A6A4KV13_9ERIC	tr|A0A834H854|A0A834H854_RHOSS Isocitrate dehydrogenase [NAD] subunit, mitochondrial OS=Rhododendron simsii OX=118357 GN=RHSIM_Rhsim04G0145600 PE=3 SV=1;tr|A0A6A4LM55|A0A6A4LM55_9ERIC Isocitrate dehydrogenase [NAD] subunit, mitochondrial (Fragment) OS=Rhod	26.5496	26.5708	26.3026	26.6181	27.2006	27.514	35.371	67.396
tr|A0A6A4LX36|A0A6A4LX36_9ERIC;tr|A0A6A4KPT1|A0A6A4KPT1_9ERIC;tr|A0A834LR25|A0A834LR25_RHOSS	tr|A0A6A4LX36|A0A6A4LX36_9ERIC E1 ubiquitin-activating enzyme (Fragment) OS=Rhododendron williamsianum OX=262921 GN=C3L33_07116 PE=3 SV=1	25.8188	NaN	25.8111	NaN	NaN	NaN	110.81	67.16
tr|A0A834G6X0|A0A834G6X0_RHOSS;tr|A0A6A4KCA0|A0A6A4KCA0_9ERIC	tr|A0A834G6X0|A0A834G6X0_RHOSS Tr-type G domain-containing protein OS=Rhododendron simsii OX=118357 GN=RHSIM_Rhsim11G0045300 PE=3 SV=1;tr|A0A6A4KCA0|A0A6A4KCA0_9ERIC Tr-type G domain-containing protein (Fragment) OS=Rhododendron williamsianum OX=262921 GN=	23.4904	24.4627	NaN	24.2058	NaN	NaN	94	65.737
tr|A0A6A4LS19|A0A6A4LS19_9ERIC;tr|A0A834L759|A0A834L759_RHOSS;tr|A0A834HHQ2|A0A834HHQ2_RHOSS;tr|A0A6A4MAY8|A0A6A4MAY8_9ERIC	tr|A0A6A4LS19|A0A6A4LS19_9ERIC Succinate-CoA ligase subunit beta (Fragment) OS=Rhododendron williamsianum OX=262921 GN=C3L33_07373 PE=3 SV=1;tr|A0A834L759|A0A834L759_RHOSS Succinate--CoA ligase [ADP-forming] subunit beta, mitochondrial OS=Rhododendron sims	26.9583	26.8812	28.4608	27.0764	26.8377	26.7471	45.09	65.295
tr|A0A834L8C4|A0A834L8C4_RHOSS;tr|A0A6A4L8S1|A0A6A4L8S1_9ERIC;tr|A0A834L8Z4|A0A834L8Z4_RHOSS;tr|A0A6A4LBQ0|A0A6A4LBQ0_9ERIC	tr|A0A834L8C4|A0A834L8C4_RHOSS Leucyl-tRNA synthetase OS=Rhododendron simsii OX=118357 GN=RHSIM_Rhsim12G0137900 PE=3 SV=1;tr|A0A6A4L8S1|A0A6A4L8S1_9ERIC Leucyl-tRNA synthetase (Fragment) OS=Rhododendron williamsianum OX=262921 GN=C3L33_14152 PE=3 SV=1;tr|A	24.353	NaN	NaN	NaN	24.7309	24.7155	146.35	64.115
tr|A0A834GI97|A0A834GI97_RHOSS	tr|A0A834GI97|A0A834GI97_RHOSS GDP-mannose 4,6-dehydratase OS=Rhododendron simsii OX=118357 GN=RHSIM_Rhsim08G0034400 PE=3 SV=1	25.3721	26.0154	26.5133	26.1811	NaN	24.6751	41.741	62.199
tr|A0A834LQ21|A0A834LQ21_RHOSS;tr|A0A6A4KY08|A0A6A4KY08_9ERIC	tr|A0A834LQ21|A0A834LQ21_RHOSS Pyruvate decarboxylase OS=Rhododendron simsii OX=118357 GN=RHSIM_Rhsim05G0219500 PE=3 SV=1	25.4874	25.0595	NaN	25.8404	26.0117	25.9041	68.165	62.153
tr|A0A834LHJ1|A0A834LHJ1_RHOSS;tr|A0A834LKV8|A0A834LKV8_RHOSS;tr|A0A834H0M4|A0A834H0M4_RHOSS;tr|A0A834GY02|A0A834GY02_RHOSS;tr|A0A6A4KXH7|A0A6A4KXH7_9ERIC;tr|A0A6A4LYQ5|A0A6A4LYQ5_9ERIC	tr|A0A834LHJ1|A0A834LHJ1_RHOSS Aldo_ket_red domain-containing protein OS=Rhododendron simsii OX=118357 GN=RHSIM_Rhsim08G0011000 PE=4 SV=1;tr|A0A834LKV8|A0A834LKV8_RHOSS Aldo_ket_red domain-containing protein OS=Rhododendron simsii OX=118357 GN=RHSIM_Rhsim0	25.371	24.8577	NaN	NaN	25.2115	25.4432	38.383	61.606
tr|A0A6A4MCL8|A0A6A4MCL8_9ERIC;tr|A0A834H767|A0A834H767_RHOSS	tr|A0A6A4MCL8|A0A6A4MCL8_9ERIC Tripeptidyl-peptidase II (Fragment) OS=Rhododendron williamsianum OX=262921 GN=C3L33_03223 PE=3 SV=1;tr|A0A834H767|A0A834H767_RHOSS Tripeptidyl-peptidase II OS=Rhododendron simsii OX=118357 GN=RHSIM_Rhsim03G0187200 PE=3 SV=1	25.4161	NaN	25.0396	25.0298	23.7774	24.9565	166.38	61.33
tr|A0A834H072|A0A834H072_RHOSS;tr|A0A834G7C1|A0A834G7C1_RHOSS;tr|A0A834G0R2|A0A834G0R2_RHOSS;tr|A0A6A4LKU9|A0A6A4LKU9_9ERIC	tr|A0A834H072|A0A834H072_RHOSS (S)-2-hydroxy-acid oxidase OS=Rhododendron simsii OX=118357 GN=RHSIM_Rhsim04G0033100 PE=3 SV=1;tr|A0A834G7C1|A0A834G7C1_RHOSS (S)-2-hydroxy-acid oxidase OS=Rhododendron simsii OX=118357 GN=RHSIM_Rhsim13G0114900 PE=3 SV=1;tr|A	26.0857	26.453	NaN	NaN	26.1772	25.7599	40.367	61.07
tr|A0A6A4KZY5|A0A6A4KZY5_9ERIC;tr|A0A834LKA4|A0A834LKA4_RHOSS;tr|A0A6A4LIK3|A0A6A4LIK3_9ERIC;tr|A0A834LLH7|A0A834LLH7_RHOSS	tr|A0A6A4KZY5|A0A6A4KZY5_9ERIC D-3-phosphoglycerate dehydrogenase (Fragment) OS=Rhododendron williamsianum OX=262921 GN=C3L33_19635 PE=3 SV=1;tr|A0A834LKA4|A0A834LKA4_RHOSS D-3-phosphoglycerate dehydrogenase OS=Rhododendron simsii OX=118357 GN=RHSIM_Rhsim0	24.3789	24.6918	23.342	NaN	NaN	NaN	62.297	61.06
tr|A0A6A4LYW7|A0A6A4LYW7_9ERIC	tr|A0A6A4LYW7|A0A6A4LYW7_9ERIC Ubiquitinyl hydrolase 1 (Fragment) OS=Rhododendron williamsianum OX=262921 GN=C3L33_04771 PE=3 SV=1	25.0433	NaN	NaN	NaN	24.8707	NaN	125.98	59.517
tr|A0A834HBW5|A0A834HBW5_RHOSS;tr|A0A834H3P5|A0A834H3P5_RHOSS;tr|A0A6A4L6P0|A0A6A4L6P0_9ERIC;tr|A0A6A4LBV2|A0A6A4LBV2_9ERIC	tr|A0A834HBW5|A0A834HBW5_RHOSS Dihydrolipoyl dehydrogenase OS=Rhododendron simsii OX=118357 GN=RHSIM_Rhsim02G0001500 PE=3 SV=1;tr|A0A834H3P5|A0A834H3P5_RHOSS Dihydrolipoyl dehydrogenase OS=Rhododendron simsii OX=118357 GN=RHSIM_Rhsim04G0244400 PE=3 SV=1;tr	23.6912	24.338	NaN	24.1021	24.7601	24.669	54.425	59.132
tr|A0A834G7U9|A0A834G7U9_RHOSS;tr|A0A6A4LDF1|A0A6A4LDF1_9ERIC	tr|A0A834G7U9|A0A834G7U9_RHOSS Uncharacterized protein OS=Rhododendron simsii OX=118357 GN=RHSIM_Rhsim12G0209200 PE=4 SV=1;tr|A0A6A4LDF1|A0A6A4LDF1_9ERIC Uncharacterized protein (Fragment) OS=Rhododendron williamsianum OX=262921 GN=C3L33_14719 PE=4 SV=1	25.2431	24.9694	NaN	22.8578	22.4256	22.1099	44.453	58.859
tr|A0A834GH00|A0A834GH00_RHOSS;tr|A0A834GMV5|A0A834GMV5_RHOSS;tr|A0A6A4M6H5|A0A6A4M6H5_9ERIC	tr|A0A834GH00|A0A834GH00_RHOSS Uncharacterized protein OS=Rhododendron simsii OX=118357 GN=RHSIM_Rhsim08G0006400 PE=4 SV=1;tr|A0A834GMV5|A0A834GMV5_RHOSS Uncharacterized protein OS=Rhododendron simsii OX=118357 GN=RHSIM_Rhsim08G0007100 PE=4 SV=1;tr|A0A6A4M	25.3823	25.4916	24.8371	24.8969	24.4191	23.8312	45.907	56.695
tr|A0A834HF26|A0A834HF26_RHOSS;tr|A0A6A4M543|A0A6A4M543_9ERIC	tr|A0A834HF26|A0A834HF26_RHOSS Epimerase domain-containing protein OS=Rhododendron simsii OX=118357 GN=RHSIM_Rhsim01G0209500 PE=4 SV=1;tr|A0A6A4M543|A0A6A4M543_9ERIC Epimerase domain-containing protein (Fragment) OS=Rhododendron williamsianum OX=262921 GN=	NaN	NaN	NaN	25.3978	25.8321	25.4732	43.695	54.747
tr|A0A6A4LRB5|A0A6A4LRB5_9ERIC;tr|A0A834L6A4|A0A834L6A4_RHOSS;tr|A0A834HE51|A0A834HE51_RHOSS;tr|A0A6A4LB28|A0A6A4LB28_9ERIC	tr|A0A6A4LRB5|A0A6A4LRB5_9ERIC Elongation factor Tu (Fragment) OS=Rhododendron williamsianum OX=262921 GN=C3L33_07521 PE=3 SV=1;tr|A0A834L6A4|A0A834L6A4_RHOSS Elongation factor Tu OS=Rhododendron simsii OX=118357 GN=RHSIM_Rhsim13G0022100 PE=3 SV=1;tr|A0A83	NaN	25.714	25.6365	25.6564	NaN	NaN	48.173	54.599
tr|A0A6A4MDB3|A0A6A4MDB3_9ERIC;tr|A0A834LSC8|A0A834LSC8_RHOSS	tr|A0A6A4MDB3|A0A6A4MDB3_9ERIC Uncharacterized protein (Fragment) OS=Rhododendron williamsianum OX=262921 GN=C3L33_02048 PE=3 SV=1;tr|A0A834LSC8|A0A834LSC8_RHOSS Uncharacterized protein OS=Rhododendron simsii OX=118357 GN=RHSIM_Rhsim03G0018900 PE=3 SV=1	NaN	NaN	NaN	NaN	26.0111	25.1911	31.91	54.382
tr|A0A6A4MQU4|A0A6A4MQU4_9ERIC;tr|A0A834LDU1|A0A834LDU1_RHOSS	tr|A0A6A4MQU4|A0A6A4MQU4_9ERIC 1-deoxy-D-xylulose-5-phosphate reductoisomerase (Fragment) OS=Rhododendron williamsianum OX=262921 GN=C3L33_00701 PE=3 SV=1;tr|A0A834LDU1|A0A834LDU1_RHOSS 1-deoxy-D-xylulose-5-phosphate reductoisomerase OS=Rhododendron simsii	NaN	23.5826	NaN	23.7223	22.9887	23.3038	42.845	53.839
tr|A0A834H566|A0A834H566_RHOSS	tr|A0A834H566|A0A834H566_RHOSS ABC1 domain-containing protein OS=Rhododendron simsii OX=118357 GN=RHSIM_Rhsim06G0177200 PE=4 SV=1	24.1986	24.9141	24.1815	24.0367	NaN	23.6178	88.608	52.15
tr|A0A834GPC0|A0A834GPC0_RHOSS;tr|A0A6A4LGZ9|A0A6A4LGZ9_9ERIC;tr|A0A6A4LVQ4|A0A6A4LVQ4_9ERIC	tr|A0A834GPC0|A0A834GPC0_RHOSS SERPIN domain-containing protein OS=Rhododendron simsii OX=118357 GN=RHSIM_Rhsim07G0233000 PE=3 SV=1;tr|A0A6A4LGZ9|A0A6A4LGZ9_9ERIC SERPIN domain-containing protein (Fragment) OS=Rhododendron williamsianum OX=262921 GN=C3L33_	25.1328	24.9449	25.071	24.3805	24.8108	24.3649	41.666	50.687
tr|A0A834G5B1|A0A834G5B1_RHOSS;tr|A0A6A4KTY4|A0A6A4KTY4_9ERIC	tr|A0A834G5B1|A0A834G5B1_RHOSS Uncharacterized protein OS=Rhododendron simsii OX=118357 GN=RHSIM_Rhsim11G0034700 PE=3 SV=1;tr|A0A6A4KTY4|A0A6A4KTY4_9ERIC Uncharacterized protein (Fragment) OS=Rhododendron williamsianum OX=262921 GN=C3L33_21838 PE=3 SV=1	25.8882	NaN	25.7148	NaN	25.3629	NaN	131.31	48.384
tr|A0A6A4M5X0|A0A6A4M5X0_9ERIC;tr|A0A834HHP5|A0A834HHP5_RHOSS	tr|A0A6A4M5X0|A0A6A4M5X0_9ERIC E1 ubiquitin-activating enzyme (Fragment) OS=Rhododendron williamsianum OX=262921 GN=C3L33_04471 PE=3 SV=1;tr|A0A834HHP5|A0A834HHP5_RHOSS E1 ubiquitin-activating enzyme OS=Rhododendron simsii OX=118357 GN=RHSIM_Rhsim01G023990	25.2097	NaN	24.3692	NaN	NaN	NaN	126.51	47.628
tr|A0A834H350|A0A834H350_RHOSS	tr|A0A834H350|A0A834H350_RHOSS Aminotran_1_2 domain-containing protein OS=Rhododendron simsii OX=118357 GN=RHSIM_Rhsim04G0022700 PE=3 SV=1	NaN	NaN	NaN	22.4654	23.0157	22.8185	46.548	47.112
tr|A0A834L8T3|A0A834L8T3_RHOSS;tr|A0A834G2Z5|A0A834G2Z5_RHOSS	tr|A0A834L8T3|A0A834L8T3_RHOSS PKS_ER domain-containing protein OS=Rhododendron simsii OX=118357 GN=RHSIM_Rhsim12G0008600 PE=3 SV=1;tr|A0A834G2Z5|A0A834G2Z5_RHOSS Uncharacterized protein OS=Rhododendron simsii OX=118357 GN=RHSIM_Rhsim12G0008800 PE=4 SV=1	NaN	23.5405	NaN	NaN	24.4829	24.4507	71.031	46.515
tr|A0A6A4LEJ2|A0A6A4LEJ2_9ERIC;tr|A0A834G5N0|A0A834G5N0_RHOSS;tr|A0A6A4L4R6|A0A6A4L4R6_9ERIC;tr|A0A834G0F1|A0A834G0F1_RHOSS	tr|A0A6A4LEJ2|A0A6A4LEJ2_9ERIC ARMT1-like_dom domain-containing protein (Fragment) OS=Rhododendron williamsianum OX=262921 GN=C3L33_14354 PE=3 SV=1;tr|A0A834G5N0|A0A834G5N0_RHOSS Pantothenate kinase 2 OS=Rhododendron simsii OX=118357 GN=RHSIM_Rhsim12G01647	24.0661	NaN	24.2689	NaN	NaN	NaN	94.312	45.934
tr|A0A6A4L5S1|A0A6A4L5S1_9ERIC;tr|A0A834HA09|A0A834HA09_RHOSS	tr|A0A6A4L5S1|A0A6A4L5S1_9ERIC RPN2_C domain-containing protein (Fragment) OS=Rhododendron williamsianum OX=262921 GN=C3L33_15170 PE=3 SV=1;tr|A0A834HA09|A0A834HA09_RHOSS 26S proteasome non-ATPase regulatory subunit 1 homolog OS=Rhododendron simsii OX=1183	25.6732	NaN	NaN	NaN	25.6418	NaN	96.206	45.23
tr|A0A834GFN9|A0A834GFN9_RHOSS;tr|A0A834GBM9|A0A834GBM9_RHOSS;tr|A0A834G9Z0|A0A834G9Z0_RHOSS;tr|A0A834GYP7|A0A834GYP7_RHOSS;tr|A0A834GHS5|A0A834GHS5_RHOSS;tr|A0A6A4KR36|A0A6A4KR36_9ERIC;tr|A0A6A4L1F1|A0A6A4L1F1_9ERIC	tr|A0A834GFN9|A0A834GFN9_RHOSS PKS_ER domain-containing protein OS=Rhododendron simsii OX=118357 GN=RHSIM_Rhsim10G0174500 PE=3 SV=1;tr|A0A834GBM9|A0A834GBM9_RHOSS PKS_ER domain-containing protein OS=Rhododendron simsii OX=118357 GN=RHSIM_Rhsim10G0174300 PE	26.5973	27.4257	27.2445	28.7082	29.341	29.0398	39.041	44.971
tr|A0A834LDB5|A0A834LDB5_RHOSS;tr|A0A6A4LHE6|A0A6A4LHE6_9ERIC	tr|A0A834LDB5|A0A834LDB5_RHOSS Gal_mutarotas_2 domain-containing protein OS=Rhododendron simsii OX=118357 GN=RHSIM_Rhsim10G0127500 PE=3 SV=1;tr|A0A6A4LHE6|A0A6A4LHE6_9ERIC Gal_mutarotas_2 domain-containing protein (Fragment) OS=Rhododendron williamsianum O	24.4456	NaN	23.67	NaN	NaN	NaN	106.26	44.751
tr|A0A6A4LED2|A0A6A4LED2_9ERIC;tr|A0A6A4LDT9|A0A6A4LDT9_9ERIC;tr|A0A6B9S3J1|A0A6B9S3J1_9ERIC;tr|A0A6B9S1Q9|A0A6B9S1Q9_9ERIC;tr|A0A2Z5TVQ4|A0A2Z5TVQ4_KALPR;tr|A0A2Z5TVH2|A0A2Z5TVH2_KALPR;tr|C8ZLJ5|C8ZLJ5_RHOSS	tr|A0A6A4LED2|A0A6A4LED2_9ERIC Gp_dh_N domain-containing protein (Fragment) OS=Rhododendron williamsianum OX=262921 GN=C3L33_14436 PE=3 SV=1;tr|A0A6A4LDT9|A0A6A4LDT9_9ERIC Gp_dh_N domain-containing protein (Fragment) OS=Rhododendron williamsianum OX=262921	27.957	27.9821	28.0936	26.5995	27.8121	28.2445	33.081	44.64
tr|A0A834H8W0|A0A834H8W0_RHOSS;tr|A0A834H951|A0A834H951_RHOSS;tr|A0A834FTP7|A0A834FTP7_RHOSS;tr|A0A834L3S1|A0A834L3S1_RHOSS	tr|A0A834H8W0|A0A834H8W0_RHOSS Uncharacterized protein OS=Rhododendron simsii OX=118357 GN=RHSIM_Rhsim03G0042000 PE=3 SV=1;tr|A0A834H951|A0A834H951_RHOSS Uncharacterized protein OS=Rhododendron simsii OX=118357 GN=RHSIM_Rhsim03G0041800 PE=3 SV=1;tr|A0A834F	NaN	21.0475	NaN	20.8238	NaN	NaN	32.844	44.326
tr|A0A834HFM0|A0A834HFM0_RHOSS	tr|A0A834HFM0|A0A834HFM0_RHOSS Uncharacterized protein OS=Rhododendron simsii OX=118357 GN=RHSIM_Rhsim01G0263100 PE=3 SV=1	23.4526	24.2961	NaN	NaN	NaN	24.0897	52.22	44.08
tr|A0A834HJL6|A0A834HJL6_RHOSS;tr|A0A6A4LVT2|A0A6A4LVT2_9ERIC	tr|A0A834HJL6|A0A834HJL6_RHOSS Serine/threonine-protein phosphatase OS=Rhododendron simsii OX=118357 GN=RHSIM_Rhsim01G0200700 PE=3 SV=1;tr|A0A6A4LVT2|A0A6A4LVT2_9ERIC Serine/threonine-protein phosphatase (Fragment) OS=Rhododendron williamsianum OX=262921 G	24.2421	NaN	NaN	24.5151	24.2807	24.7094	110.75	43.996
tr|A0A834G7G5|A0A834G7G5_RHOSS	tr|A0A834G7G5|A0A834G7G5_RHOSS Carboxypeptidase OS=Rhododendron simsii OX=118357 GN=RHSIM_Rhsim11G0168200 PE=3 SV=1	24.5003	NaN	NaN	24.8525	24.3524	NaN	52.639	43.476
tr|A0A834LHP7|A0A834LHP7_RHOSS	tr|A0A834LHP7|A0A834LHP7_RHOSS Uncharacterized protein OS=Rhododendron simsii OX=118357 GN=RHSIM_Rhsim07G0093000 PE=4 SV=1	25.4245	24.9507	NaN	NaN	NaN	NaN	24.095	42.028
tr|A0A6A4LMQ1|A0A6A4LMQ1_9ERIC;tr|A0A834GVF1|A0A834GVF1_RHOSS	tr|A0A6A4LMQ1|A0A6A4LMQ1_9ERIC Uncharacterized protein (Fragment) OS=Rhododendron williamsianum OX=262921 GN=C3L33_10407 PE=3 SV=1;tr|A0A834GVF1|A0A834GVF1_RHOSS 26S proteasome non-ATPase regulatory subunit 2 homolog OS=Rhododendron simsii OX=118357 GN=RHS	24.0098	23.9172	23.9514	24.1839	NaN	NaN	90.613	41.953
tr|A0A834H743|A0A834H743_RHOSS;tr|A0A6A4LLM8|A0A6A4LLM8_9ERIC;tr|A0A2H4KDN8|A0A2H4KDN8_RHOFO	tr|A0A834H743|A0A834H743_RHOSS Glutamine synthetase OS=Rhododendron simsii OX=118357 GN=RHSIM_Rhsim04G0209400 PE=3 SV=1;tr|A0A6A4LLM8|A0A6A4LLM8_9ERIC Glutamine synthetase (Fragment) OS=Rhododendron williamsianum OX=262921 GN=C3L33_12780 PE=3 SV=1	25.3425	24.9166	25.415	25.6937	23.9594	24.9903	49.919	41.591
tr|A0A834HCB8|A0A834HCB8_RHOSS	tr|A0A834HCB8|A0A834HCB8_RHOSS Aldo_ket_red domain-containing protein OS=Rhododendron simsii OX=118357 GN=RHSIM_Rhsim02G0056400 PE=4 SV=1	NaN	NaN	NaN	NaN	23.9427	23.9537	45.249	40.974
tr|A0A834GBR4|A0A834GBR4_RHOSS	tr|A0A834GBR4|A0A834GBR4_RHOSS Uncharacterized protein OS=Rhododendron simsii OX=118357 GN=RHSIM_Rhsim11G0173300 PE=4 SV=1	NaN	NaN	24.0638	24.1842	NaN	NaN	83.957	40.701
tr|A0A834LQF7|A0A834LQF7_RHOSS;tr|A0A6A4LBW2|A0A6A4LBW2_9ERIC;tr|A0A6A4L499|A0A6A4L499_9ERIC;tr|A0A834LSY3|A0A834LSY3_RHOSS;tr|A0A6A4LW85|A0A6A4LW85_9ERIC;tr|A0A834GKZ3|A0A834GKZ3_RHOSS;tr|A0A6A4LC76|A0A6A4LC76_9ERIC;tr|A0A834FZU5|A0A834FZU5_RHOSS;tr|A0A6A4M3K6|A0A6A4M3K6_9ERIC	tr|A0A834LQF7|A0A834LQF7_RHOSS Protein kinase domain-containing protein OS=Rhododendron simsii OX=118357 GN=RHSIM_Rhsim04G0247700 PE=3 SV=1;tr|A0A6A4LBW2|A0A6A4LBW2_9ERIC Protein kinase domain-containing protein (Fragment) OS=Rhododendron williamsianum OX=	NaN	24.5333	NaN	24.8255	25.2073	25.2891	41.74	40.612
tr|A0A834LME0|A0A834LME0_RHOSS;tr|A0A834H588|A0A834H588_RHOSS;tr|A0A6A4M2J9|A0A6A4M2J9_9ERIC;tr|A0A6A4L0Z4|A0A6A4L0Z4_9ERIC	tr|A0A834LME0|A0A834LME0_RHOSS KH type-2 domain-containing protein OS=Rhododendron simsii OX=118357 GN=RHSIM_Rhsim05G0012000 PE=3 SV=1;tr|A0A834H588|A0A834H588_RHOSS KH type-2 domain-containing protein OS=Rhododendron simsii OX=118357 GN=RHSIM_Rhsim03G0229	24.5111	NaN	24.9619	24.7769	NaN	NaN	26.845	40.609
tr|A0A834H5V6|A0A834H5V6_RHOSS;tr|A0A6A4LI97|A0A6A4LI97_9ERIC;tr|A0A6A4LA76|A0A6A4LA76_9ERIC;tr|A0A834H5E2|A0A834H5E2_RHOSS	tr|A0A834H5V6|A0A834H5V6_RHOSS Uncharacterized protein OS=Rhododendron simsii OX=118357 GN=RHSIM_Rhsim04G0038100 PE=4 SV=1;tr|A0A6A4LI97|A0A6A4LI97_9ERIC Uncharacterized protein (Fragment) OS=Rhododendron williamsianum OX=262921 GN=C3L33_10650 PE=4 SV=1	NaN	22.9408	24.3235	24.3981	24.6443	24.5327	44.31	39.549
tr|A0A834G1M8|A0A834G1M8_RHOSS;tr|A0A6A4LBV9|A0A6A4LBV9_9ERIC;tr|A0A834LM92|A0A834LM92_RHOSS	tr|A0A834G1M8|A0A834G1M8_RHOSS Uncharacterized protein OS=Rhododendron simsii OX=118357 GN=RHSIM_Rhsim12G0195700 PE=3 SV=1;tr|A0A6A4LBV9|A0A6A4LBV9_9ERIC Aminotran_1_2 domain-containing protein (Fragment) OS=Rhododendron williamsianum OX=262921 GN=C3L33_14	NaN	NaN	NaN	NaN	25.7127	25.3939	49.828	39.433
tr|A0A6A4L8Y7|A0A6A4L8Y7_9ERIC;tr|A0A834L8H1|A0A834L8H1_RHOSS	tr|A0A6A4L8Y7|A0A6A4L8Y7_9ERIC Transaldolase (Fragment) OS=Rhododendron williamsianum OX=262921 GN=C3L33_13294 PE=3 SV=1;tr|A0A834L8H1|A0A834L8H1_RHOSS Transaldolase OS=Rhododendron simsii OX=118357 GN=RHSIM_Rhsim12G0017100 PE=3 SV=1	25.2577	24.7444	25.5366	24.9259	25.6129	25.6576	48.168	39.227
tr|A0A834FZN3|A0A834FZN3_RHOSS;tr|A0A6A4LS46|A0A6A4LS46_9ERIC;tr|A0A6A4LMI9|A0A6A4LMI9_9ERIC;tr|A0A6A4L108|A0A6A4L108_9ERIC;tr|A0A6A4L2F5|A0A6A4L2F5_9ERIC;tr|A0A834GEK4|A0A834GEK4_RHOSS;tr|A0A834HD74|A0A834HD74_RHOSS;tr|A0A834GND4|A0A834GND4_RHOSS	tr|A0A834FZN3|A0A834FZN3_RHOSS AAA domain-containing protein OS=Rhododendron simsii OX=118357 GN=RHSIM_Rhsim13G0058000 PE=3 SV=1;tr|A0A6A4LS46|A0A6A4LS46_9ERIC AAA domain-containing protein (Fragment) OS=Rhododendron williamsianum OX=262921 GN=C3L33_07188	20.5221	NaN	NaN	20.5492	NaN	NaN	49.853	37.252
tr|A0A834HIS1|A0A834HIS1_RHOSS;tr|A0A834HI73|A0A834HI73_RHOSS;tr|A0A834LQQ6|A0A834LQQ6_RHOSS;tr|A0A834FUE4|A0A834FUE4_RHOSS;tr|A0A6A4M4L7|A0A6A4M4L7_9ERIC	tr|A0A834HIS1|A0A834HIS1_RHOSS CYTOSOL_AP domain-containing protein OS=Rhododendron simsii OX=118357 GN=RHSIM_Rhsim01G0033300 PE=3 SV=1;tr|A0A834HI73|A0A834HI73_RHOSS CYTOSOL_AP domain-containing protein OS=Rhododendron simsii OX=118357 GN=RHSIM_Rhsim01G00	23.9958	24.3671	NaN	22.9777	23.7849	23.279	55.095	36.031
tr|A0A6A4MBK3|A0A6A4MBK3_9ERIC;tr|A0A834HAE4|A0A834HAE4_RHOSS	tr|A0A6A4MBK3|A0A6A4MBK3_9ERIC Oxidored_FMN domain-containing protein (Fragment) OS=Rhododendron williamsianum OX=262921 GN=C3L33_03523 PE=3 SV=1;tr|A0A834HAE4|A0A834HAE4_RHOSS Oxidored_FMN domain-containing protein OS=Rhododendron simsii OX=118357 GN=RHSI	NaN	NaN	22.1705	21.6097	NaN	21.6435	42.958	35.092
tr|A0A6A4KEI2|A0A6A4KEI2_9ERIC;tr|A0A834GYW9|A0A834GYW9_RHOSS;tr|A0A6A4L036|A0A6A4L036_9ERIC	tr|A0A6A4KEI2|A0A6A4KEI2_9ERIC Protein kinase domain-containing protein (Fragment) OS=Rhododendron williamsianum OX=262921 GN=C3L33_21226 PE=3 SV=1	NaN	NaN	NaN	NaN	24.7268	24.6995	34.081	34.99
tr|A0A834G3V1|A0A834G3V1_RHOSS;tr|A0A6A4L301|A0A6A4L301_9ERIC;tr|A0A6A4MMA9|A0A6A4MMA9_9ERIC;tr|A0A834GLZ6|A0A834GLZ6_RHOSS	tr|A0A834G3V1|A0A834G3V1_RHOSS Aldedh domain-containing protein OS=Rhododendron simsii OX=118357 GN=RHSIM_Rhsim12G0047500 PE=3 SV=1;tr|A0A6A4L301|A0A6A4L301_9ERIC Aldedh domain-containing protein (Fragment) OS=Rhododendron williamsianum OX=262921 GN=C3L33_	25.8709	24.9485	26.4017	25.9996	25.7277	26.08	55.174	34.687
tr|A0A834L639|A0A834L639_RHOSS;tr|A0A6A4LWF1|A0A6A4LWF1_9ERIC	tr|A0A834L639|A0A834L639_RHOSS Pyruvate kinase OS=Rhododendron simsii OX=118357 GN=RHSIM_Rhsim13G0234600 PE=3 SV=1;tr|A0A6A4LWF1|A0A6A4LWF1_9ERIC Pyruvate kinase (Fragment) OS=Rhododendron williamsianum OX=262921 GN=C3L33_05734 PE=3 SV=1	24.855	24.9819	25.2109	NaN	24.6641	NaN	53.866	34.54
tr|A0A834GJ02|A0A834GJ02_RHOSS	tr|A0A834GJ02|A0A834GJ02_RHOSS PKS_ER domain-containing protein OS=Rhododendron simsii OX=118357 GN=RHSIM_Rhsim09G0052100 PE=4 SV=1	NaN	25.5063	26.6732	26.155	26.3509	26.043	60.227	33.435
tr|Q71N69|Q71N69_PHYCU	tr|Q71N69|Q71N69_PHYCU Ribulose bisphosphate carboxylase large chain (Fragment) OS=Phyllodoce caerulea OX=49155 GN=rbcL PE=3 SV=1	24.4001	24.557	NaN	NaN	NaN	NaN	46.998	33.261
tr|A0A834GX72|A0A834GX72_RHOSS;tr|A0A6A4KSA9|A0A6A4KSA9_9ERIC	tr|A0A834GX72|A0A834GX72_RHOSS Uncharacterized protein OS=Rhododendron simsii OX=118357 GN=RHSIM_Rhsim05G0056500 PE=3 SV=1	25.8898	27.0224	NaN	NaN	25.8287	26.0824	42.602	32.63
tr|A0A834L673|A0A834L673_RHOSS	tr|A0A834L673|A0A834L673_RHOSS Uncharacterized protein OS=Rhododendron simsii OX=118357 GN=RHSIM_Rhsim13G0035100 PE=3 SV=1	31.5072	30.9181	31.6244	30.9141	31.5878	30.9242	54.436	32.279
tr|A0A6A4M0Y1|A0A6A4M0Y1_9ERIC;tr|A0A834LGR3|A0A834LGR3_RHOSS	tr|A0A6A4M0Y1|A0A6A4M0Y1_9ERIC Uncharacterized protein (Fragment) OS=Rhododendron williamsianum OX=262921 GN=C3L33_07848 PE=4 SV=1;tr|A0A834LGR3|A0A834LGR3_RHOSS Uncharacterized protein OS=Rhododendron simsii OX=118357 GN=RHSIM_Rhsim07G0002300 PE=4 SV=1	24.4383	NaN	24.0682	NaN	NaN	NaN	116.86	31.871
tr|A0A6A4LGZ3|A0A6A4LGZ3_9ERIC	tr|A0A6A4LGZ3|A0A6A4LGZ3_9ERIC Uncharacterized protein (Fragment) OS=Rhododendron williamsianum OX=262921 GN=C3L33_14321 PE=4 SV=1	NaN	22.5829	NaN	21.8915	NaN	NaN	45.066	31.356
tr|A0A834GK42|A0A834GK42_RHOSS;tr|A0A6A4MQW6|A0A6A4MQW6_9ERIC	tr|A0A834GK42|A0A834GK42_RHOSS V-type proton ATPase subunit C OS=Rhododendron simsii OX=118357 GN=RHSIM_Rhsim08G0195300 PE=3 SV=1;tr|A0A6A4MQW6|A0A6A4MQW6_9ERIC V-type proton ATPase subunit C (Fragment) OS=Rhododendron williamsianum OX=262921 GN=C3L33_0049	NaN	NaN	NaN	NaN	25.815	25.9896	52.043	31.05
tr|A0A6A4MN12|A0A6A4MN12_9ERIC;tr|A0A6A4KSK6|A0A6A4KSK6_9ERIC;tr|A0A834GPD8|A0A834GPD8_RHOSS;tr|A0A6A4MLD0|A0A6A4MLD0_9ERIC;tr|A0A834LQA4|A0A834LQA4_RHOSS;tr|A0A834LH56|A0A834LH56_RHOSS;tr|A0A834GAY0|A0A834GAY0_RHOSS;tr|A0A834G2T6|A0A834G2T6_RHOSS;tr|A0A6A4M135|A0A6A4M135_9ERIC;tr|A0A6A4LYH5|A0A6A4LYH5_9ERIC;tr|A0A6A4L275|A0A6A4L275_9ERIC;tr|A0A834HIN5|A0A834HIN5_RHOSS	tr|A0A6A4MN12|A0A6A4MN12_9ERIC Uncharacterized protein (Fragment) OS=Rhododendron williamsianum OX=262921 GN=C3L33_01342 PE=3 SV=1;tr|A0A6A4KSK6|A0A6A4KSK6_9ERIC Tubulin_C domain-containing protein (Fragment) OS=Rhododendron williamsianum OX=262921 GN=C3L3	NaN	NaN	25.7119	25.4916	NaN	NaN	38.933	30.819
tr|A0A834LMR4|A0A834LMR4_RHOSS;tr|A0A6A4LL16|A0A6A4LL16_9ERIC	tr|A0A834LMR4|A0A834LMR4_RHOSS Uncharacterized protein OS=Rhododendron simsii OX=118357 GN=RHSIM_Rhsim04G0243100 PE=4 SV=1;tr|A0A6A4LL16|A0A6A4LL16_9ERIC Uncharacterized protein (Fragment) OS=Rhododendron williamsianum OX=262921 GN=C3L33_13030 PE=4 SV=1	NaN	NaN	NaN	24.0573	NaN	24.3363	48.009	30.194
tr|A0A834LB94|A0A834LB94_RHOSS	tr|A0A834LB94|A0A834LB94_RHOSS PKS_ER domain-containing protein OS=Rhododendron simsii OX=118357 GN=RHSIM_Rhsim11G0160000 PE=4 SV=1	NaN	NaN	NaN	NaN	24.7373	24.7396	37.793	30.187
tr|A0A6A4L448|A0A6A4L448_9ERIC	tr|A0A6A4L448|A0A6A4L448_9ERIC Methylenetetrahydrofolate reductase (Fragment) OS=Rhododendron williamsianum OX=262921 GN=C3L33_17583 PE=3 SV=1	23.7118	23.7204	NaN	24.4092	NaN	23.4209	66.877	30.186
tr|A0A834LXF4|A0A834LXF4_RHOSS;tr|A0A6A4LRL3|A0A6A4LRL3_9ERIC;tr|A0A834HIV1|A0A834HIV1_RHOSS;tr|A0A834FYA1|A0A834FYA1_RHOSS	tr|A0A834LXF4|A0A834LXF4_RHOSS Uncharacterized protein OS=Rhododendron simsii OX=118357 GN=RHSIM_Rhsim01G0235200 PE=4 SV=1;tr|A0A6A4LRL3|A0A6A4LRL3_9ERIC Uncharacterized protein (Fragment) OS=Rhododendron williamsianum OX=262921 GN=C3L33_04511 PE=4 SV=1;tr	24.9754	24.6016	NaN	NaN	NaN	25.0598	66.356	29.642
tr|A0A6A4KIP1|A0A6A4KIP1_9ERIC;tr|A0A6A4M1E0|A0A6A4M1E0_9ERIC	tr|A0A6A4KIP1|A0A6A4KIP1_9ERIC Uncharacterized protein (Fragment) OS=Rhododendron williamsianum OX=262921 GN=C3L33_22096 PE=4 SV=1;tr|A0A6A4M1E0|A0A6A4M1E0_9ERIC Uncharacterized protein (Fragment) OS=Rhododendron williamsianum OX=262921 GN=C3L33_03932 PE=4	24.8753	NaN	24.8382	25.446	25.1097	24.9264	44.804	29.544
tr|A0A834HFD1|A0A834HFD1_RHOSS;tr|A0A6A4LRG3|A0A6A4LRG3_9ERIC	tr|A0A834HFD1|A0A834HFD1_RHOSS Uncharacterized protein OS=Rhododendron simsii OX=118357 GN=RHSIM_Rhsim01G0224200 PE=3 SV=1;tr|A0A6A4LRG3|A0A6A4LRG3_9ERIC Uncharacterized protein (Fragment) OS=Rhododendron williamsianum OX=262921 GN=C3L33_04588 PE=3 SV=1	27.1023	25.8536	26.7788	NaN	26.7187	26.4243	38.461	28.883
tr|A0A834H6I3|A0A834H6I3_RHOSS;tr|A0A6A4M1J8|A0A6A4M1J8_9ERIC;tr|A0A834GD83|A0A834GD83_RHOSS;tr|A0A6A4L5B6|A0A6A4L5B6_9ERIC	tr|A0A834H6I3|A0A834H6I3_RHOSS Mannose-1-phosphate guanylyltransferase OS=Rhododendron simsii OX=118357 GN=RHSIM_Rhsim03G0136400 PE=4 SV=1;tr|A0A6A4M1J8|A0A6A4M1J8_9ERIC Mannose-1-phosphate guanylyltransferase (Fragment) OS=Rhododendron williamsianum OX=26	23.3955	NaN	NaN	23.4328	22.8345	23.2938	39.607	27.783
tr|A0A6A4M0P7|A0A6A4M0P7_9ERIC;tr|A0A834H033|A0A834H033_RHOSS	tr|A0A6A4M0P7|A0A6A4M0P7_9ERIC Alpha-aminoacylpeptide hydrolase (Fragment) OS=Rhododendron williamsianum OX=262921 GN=C3L33_07779 PE=3 SV=1;tr|A0A834H033|A0A834H033_RHOSS Aminopeptidase OS=Rhododendron simsii OX=118357 GN=RHSIM_Rhsim07G0175300 PE=3 SV=1	25.2182	24.5	NaN	24.8944	NaN	NaN	80.327	27.585
tr|A0A6A4LAP9|A0A6A4LAP9_9ERIC;tr|A0A834H071|A0A834H071_RHOSS;tr|A0A834LWK0|A0A834LWK0_RHOSS;tr|A0A6A4KZ53|A0A6A4KZ53_9ERIC	tr|A0A6A4LAP9|A0A6A4LAP9_9ERIC Uncharacterized protein (Fragment) OS=Rhododendron williamsianum OX=262921 GN=C3L33_12714 PE=3 SV=1;tr|A0A834H071|A0A834H071_RHOSS 40S ribosomal protein S3a OS=Rhododendron simsii OX=118357 GN=RHSIM_Rhsim04G0199100 PE=3 SV=1;	25.6652	NaN	24.3268	NaN	NaN	NaN	33.314	27.188
tr|A0A6A4MK40|A0A6A4MK40_9ERIC	tr|A0A6A4MK40|A0A6A4MK40_9ERIC HP domain-containing protein (Fragment) OS=Rhododendron williamsianum OX=262921 GN=C3L33_02037 PE=4 SV=1	24.3946	NaN	23.3998	22.6375	24.2951	23.316	57.811	27.003
tr|A0A0A7NXC7|A0A0A7NXC7_9ERIC	tr|A0A0A7NXC7|A0A0A7NXC7_9ERIC Ribulose bisphosphate carboxylase large chain (Fragment) OS=Erica vagans OX=270446 GN=rbcL PE=3 SV=1	23.1267	23.0314	NaN	NaN	NaN	NaN	43.041	26.801
tr|A0A834G2M6|A0A834G2M6_RHOSS	tr|A0A834G2M6|A0A834G2M6_RHOSS Amidohydro-rel domain-containing protein OS=Rhododendron simsii OX=118357 GN=RHSIM_Rhsim13G0210400 PE=4 SV=1	26.2443	26.1086	NaN	NaN	NaN	NaN	23.672	26.736
tr|A0A6A4LP41|A0A6A4LP41_9ERIC;tr|A0A6A4L3Y0|A0A6A4L3Y0_9ERIC;tr|A0A834HKE2|A0A834HKE2_RHOSS;tr|A0A6A4L960|A0A6A4L960_9ERIC;tr|A0A834HEF8|A0A834HEF8_RHOSS	tr|A0A6A4LP41|A0A6A4LP41_9ERIC Sucrose-phosphate synthase (Fragment) OS=Rhododendron williamsianum OX=262921 GN=C3L33_05417 PE=3 SV=1;tr|A0A6A4L3Y0|A0A6A4L3Y0_9ERIC Sucrose-phosphate synthase (Fragment) OS=Rhododendron williamsianum OX=262921 GN=C3L33_1591	25.0749	NaN	25.3028	NaN	NaN	NaN	105.71	26.054
tr|A0A834GLC4|A0A834GLC4_RHOSS;tr|A0A6A4M080|A0A6A4M080_9ERIC;tr|A0A6A4KPS1|A0A6A4KPS1_9ERIC;tr|A0A6A4KV31|A0A6A4KV31_9ERIC;tr|A0A834G954|A0A834G954_RHOSS;tr|A0A834GBM5|A0A834GBM5_RHOSS	tr|A0A834GLC4|A0A834GLC4_RHOSS Pro-apoptotic serine protease NMA111 OS=Rhododendron simsii OX=118357 GN=RHSIM_Rhsim08G0086100 PE=3 SV=1;tr|A0A6A4M080|A0A6A4M080_9ERIC Pro-apoptotic serine protease NMA111 (Fragment) OS=Rhododendron williamsianum OX=262921 G	24.4196	NaN	24.3712	NaN	24.605	NaN	127.49	26.043
tr|A0A834GWF3|A0A834GWF3_RHOSS;tr|A0A6A4L8Q0|A0A6A4L8Q0_9ERIC	tr|A0A834GWF3|A0A834GWF3_RHOSS Uncharacterized protein OS=Rhododendron simsii OX=118357 GN=RHSIM_Rhsim06G0009700 PE=3 SV=1;tr|A0A6A4L8Q0|A0A6A4L8Q0_9ERIC Uncharacterized protein (Fragment) OS=Rhododendron williamsianum OX=262921 GN=C3L33_11221 PE=3 SV=1	NaN	NaN	NaN	24.1612	NaN	23.6038	59.923	25.635
tr|A0A6A4MFQ9|A0A6A4MFQ9_9ERIC	tr|A0A6A4MFQ9|A0A6A4MFQ9_9ERIC PCI domain-containing protein (Fragment) OS=Rhododendron williamsianum OX=262921 GN=C3L33_01459 PE=3 SV=1	NaN	24.6533	25.5852	24.7144	NaN	NaN	52.258	24.285
tr|A0A834HCF4|A0A834HCF4_RHOSS;tr|A0A6A4L6M8|A0A6A4L6M8_9ERIC;tr|A0A6A4L4B1|A0A6A4L4B1_9ERIC;tr|A0A834GFH2|A0A834GFH2_RHOSS	tr|A0A834HCF4|A0A834HCF4_RHOSS 6-phosphogluconate dehydrogenase, decarboxylating OS=Rhododendron simsii OX=118357 GN=RHSIM_Rhsim02G0239600 PE=3 SV=1;tr|A0A6A4L6M8|A0A6A4L6M8_9ERIC 6-phosphogluconate dehydrogenase, decarboxylating (Fragment) OS=Rhododendron	23.3964	23.3897	NaN	NaN	NaN	NaN	52.467	24.074
tr|A0A834HIN3|A0A834HIN3_RHOSS;tr|A0A834HCM8|A0A834HCM8_RHOSS;tr|A0A6A4M1A2|A0A6A4M1A2_9ERIC	tr|A0A834HIN3|A0A834HIN3_RHOSS Proline--tRNA ligase OS=Rhododendron simsii OX=118357 GN=RHSIM_Rhsim01G0000400 PE=3 SV=1;tr|A0A834HCM8|A0A834HCM8_RHOSS Prolyl-tRNA synthetase OS=Rhododendron simsii OX=118357 GN=RHSIM_Rhsim02G0055200 PE=4 SV=1;tr|A0A6A4M1A2|	21.8279	NaN	NaN	NaN	22.6347	NaN	69.294	23.043
tr|A0A834GVD2|A0A834GVD2_RHOSS;tr|A0A6A4LBV7|A0A6A4LBV7_9ERIC	tr|A0A834GVD2|A0A834GVD2_RHOSS Dolichyl-diphosphooligosaccharide--protein glycosyltransferase subunit 1 OS=Rhododendron simsii OX=118357 GN=RHSIM_Rhsim06G0004300 PE=3 SV=1	23.3106	NaN	NaN	NaN	NaN	23.6308	68.631	22.96
tr|A0A6A4LFB0|A0A6A4LFB0_9ERIC;tr|A0A834LJD1|A0A834LJD1_RHOSS	tr|A0A6A4LFB0|A0A6A4LFB0_9ERIC Glucose-6-phosphate isomerase (Fragment) OS=Rhododendron williamsianum OX=262921 GN=C3L33_11042 PE=3 SV=1;tr|A0A834LJD1|A0A834LJD1_RHOSS Glucose-6-phosphate isomerase OS=Rhododendron simsii OX=118357 GN=RHSIM_Rhsim06G0034400	22.2117	22.0614	NaN	NaN	NaN	NaN	54.167	22.896
tr|A0A6A4KYN0|A0A6A4KYN0_9ERIC	tr|A0A6A4KYN0|A0A6A4KYN0_9ERIC Uncharacterized protein (Fragment) OS=Rhododendron williamsianum OX=262921 GN=C3L33_20078 PE=4 SV=1	NaN	20.4969	NaN	20.866	NaN	NaN	41.427	22.447
tr|A0A834HB70|A0A834HB70_RHOSS;tr|A0A6A4KWN5|A0A6A4KWN5_9ERIC	tr|A0A834HB70|A0A834HB70_RHOSS PKS_ER domain-containing protein OS=Rhododendron simsii OX=118357 GN=RHSIM_Rhsim02G0255500 PE=3 SV=1;tr|A0A6A4KWN5|A0A6A4KWN5_9ERIC PKS_ER domain-containing protein (Fragment) OS=Rhododendron williamsianum OX=262921 GN=C3L33_	NaN	NaN	NaN	24.2306	24.2686	NaN	42.883	22.396
tr|A0A6A4KXE4|A0A6A4KXE4_9ERIC;tr|A0A834GIW6|A0A834GIW6_RHOSS	tr|A0A6A4KXE4|A0A6A4KXE4_9ERIC Uncharacterized protein (Fragment) OS=Rhododendron williamsianum OX=262921 GN=C3L33_17740 PE=3 SV=1;tr|A0A834GIW6|A0A834GIW6_RHOSS V-type proton ATPase subunit OS=Rhododendron simsii OX=118357 GN=RHSIM_Rhsim09G0146300 PE=3 SV	NaN	NaN	24.4611	25.135	25.1958	NaN	29.242	21.923
tr|A0A834H0C3|A0A834H0C3_RHOSS	tr|A0A834H0C3|A0A834H0C3_RHOSS S-adenosylmethionine synthase OS=Rhododendron simsii OX=118357 GN=RHSIM_Rhsim05G0121700 PE=3 SV=1	NaN	NaN	NaN	25.9248	NaN	25.8536	43.048	21.867
tr|A0A6A4L1K3|A0A6A4L1K3_9ERIC;tr|A0A834GFK9|A0A834GFK9_RHOSS;tr|K0GF22|K0GF22_9ERIC;tr|A0A834GCE0|A0A834GCE0_RHOSS;tr|A0A834LEC9|A0A834LEC9_RHOSS;tr|A0A834H3W9|A0A834H3W9_RHOSS	tr|A0A6A4L1K3|A0A6A4L1K3_9ERIC Beta-fructofuranosidase (Fragment) OS=Rhododendron williamsianum OX=262921 GN=C3L33_16481 PE=3 SV=1;tr|A0A834GFK9|A0A834GFK9_RHOSS Beta-fructofuranosidase OS=Rhododendron simsii OX=118357 GN=RHSIM_Rhsim09G0191800 PE=3 SV=1;tr	26.3167	NaN	NaN	NaN	26.1824	26.6453	60.885	21.447
tr|A0A6A4ME79|A0A6A4ME79_9ERIC;tr|A0A834HAW5|A0A834HAW5_RHOSS;tr|A0A6A4L7Q7|A0A6A4L7Q7_9ERIC;tr|A0A834LEU1|A0A834LEU1_RHOSS;tr|A0A834FV12|A0A834FV12_RHOSS	tr|A0A6A4ME79|A0A6A4ME79_9ERIC Glycerol-3-phosphate dehydrogenase (Fragment) OS=Rhododendron williamsianum OX=262921 GN=C3L33_02794 PE=3 SV=1;tr|A0A834HAW5|A0A834HAW5_RHOSS Glycerol-3-phosphate dehydrogenase OS=Rhododendron simsii OX=118357 GN=RHSIM_Rhsim0	NaN	NaN	NaN	23.0875	NaN	22.8696	50.968	20.949
tr|A0A834GUU7|A0A834GUU7_RHOSS;tr|A0A6A4LQQ3|A0A6A4LQQ3_9ERIC	tr|A0A834GUU7|A0A834GUU7_RHOSS TIP120 domain-containing protein OS=Rhododendron simsii OX=118357 GN=RHSIM_Rhsim05G0115300 PE=3 SV=1	24.2831	NaN	24.4538	NaN	NaN	NaN	153.34	20.776
tr|A0A834HG80|A0A834HG80_RHOSS;tr|A0A6A4KZS3|A0A6A4KZS3_9ERIC	tr|A0A834HG80|A0A834HG80_RHOSS Methyltransferase OS=Rhododendron simsii OX=118357 GN=RHSIM_Rhsim02G0040300 PE=3 SV=1;tr|A0A6A4KZS3|A0A6A4KZS3_9ERIC Methyltransferase (Fragment) OS=Rhododendron williamsianum OX=262921 GN=C3L33_15078 PE=3 SV=1	23.7406	NaN	24.0353	NaN	NaN	NaN	70.291	20.548
tr|A0A6A4KFW9|A0A6A4KFW9_9ERIC;tr|A0A6A4M8I4|A0A6A4M8I4_9ERIC;tr|A0A834LD04|A0A834LD04_RHOSS	tr|A0A6A4KFW9|A0A6A4KFW9_9ERIC Uncharacterized protein (Fragment) OS=Rhododendron williamsianum OX=262921 GN=C3L33_23510 PE=4 SV=1;tr|A0A6A4M8I4|A0A6A4M8I4_9ERIC Uncharacterized protein (Fragment) OS=Rhododendron williamsianum OX=262921 GN=C3L33_00507 PE=3	NaN	NaN	NaN	NaN	27.5341	26.808	14.693	20.451
tr|A0A834GE51|A0A834GE51_RHOSS;tr|A0A834LE61|A0A834LE61_RHOSS	tr|A0A834GE51|A0A834GE51_RHOSS Uncharacterized protein OS=Rhododendron simsii OX=118357 GN=RHSIM_Rhsim09G0157900 PE=4 SV=1;tr|A0A834LE61|A0A834LE61_RHOSS CPSF_A domain-containing protein OS=Rhododendron simsii OX=118357 GN=RHSIM_Rhsim09G0158100 PE=4 SV=1	NaN	NaN	22.6829	NaN	23.2733	NaN	134.8	20.347
tr|A0A834GBR3|A0A834GBR3_RHOSS;tr|A0A834GBN8|A0A834GBN8_RHOSS	tr|A0A834GBR3|A0A834GBR3_RHOSS PKS_ER domain-containing protein OS=Rhododendron simsii OX=118357 GN=RHSIM_Rhsim10G0175100 PE=3 SV=1;tr|A0A834GBN8|A0A834GBN8_RHOSS PKS_ER domain-containing protein OS=Rhododendron simsii OX=118357 GN=RHSIM_Rhsim10G0174600 PE	NaN	NaN	NaN	NaN	24.0893	23.1981	38.873	20.065
tr|G1CT32|G1CT32_RHOIN	tr|G1CT32|G1CT32_RHOIN Glyceraldehyde-3-phosphate dehydrogenase GAPC2 (Fragment) OS=Rhododendron indicum OX=75581 PE=3 SV=1	23.822	NaN	NaN	NaN	NaN	24.2659	21.221	19.498
tr|A0A834H5A8|A0A834H5A8_RHOSS	tr|A0A834H5A8|A0A834H5A8_RHOSS Uncharacterized protein OS=Rhododendron simsii OX=118357 GN=RHSIM_Rhsim03G0041200 PE=3 SV=1	24.3639	NaN	NaN	25.8301	NaN	25.4464	87.601	19.493
tr|A0A6A4M8F8|A0A6A4M8F8_9ERIC;tr|A0A834HH93|A0A834HH93_RHOSS	tr|A0A6A4M8F8|A0A6A4M8F8_9ERIC Uncharacterized protein (Fragment) OS=Rhododendron williamsianum OX=262921 GN=C3L33_05024 PE=4 SV=1;tr|A0A834HH93|A0A834HH93_RHOSS Uncharacterized protein OS=Rhododendron simsii OX=118357 GN=RHSIM_Rhsim01G0147300 PE=4 SV=1	NaN	NaN	NaN	23.405	NaN	23.7046	47.172	18.808
tr|A0A6A4LI26|A0A6A4LI26_9ERIC;tr|A0A834GPU5|A0A834GPU5_RHOSS	tr|A0A6A4LI26|A0A6A4LI26_9ERIC COPIIcoated_ERV domain-containing protein (Fragment) OS=Rhododendron williamsianum OX=262921 GN=C3L33_07798 PE=4 SV=1;tr|A0A834GPU5|A0A834GPU5_RHOSS Uncharacterized protein OS=Rhododendron simsii OX=118357 GN=RHSIM_Rhsim07G01	NaN	NaN	25.5552	NaN	NaN	23.9014	36.165	18.702
tr|A0A6A4KYA1|A0A6A4KYA1_9ERIC;tr|A0A834HCG5|A0A834HCG5_RHOSS;tr|A0A834H8S6|A0A834H8S6_RHOSS	tr|A0A6A4KYA1|A0A6A4KYA1_9ERIC Uncharacterized protein (Fragment) OS=Rhododendron williamsianum OX=262921 GN=C3L33_15616 PE=4 SV=1;tr|A0A834HCG5|A0A834HCG5_RHOSS Uncharacterized protein OS=Rhododendron simsii OX=118357 GN=RHSIM_Rhsim02G0149100 PE=3 SV=1	24.2636	NaN	24.1105	NaN	NaN	NaN	113.65	18.53
tr|A0A6A4M8Z4|A0A6A4M8Z4_9ERIC;tr|A0A834GMQ0|A0A834GMQ0_RHOSS	tr|A0A6A4M8Z4|A0A6A4M8Z4_9ERIC PALP domain-containing protein (Fragment) OS=Rhododendron williamsianum OX=262921 GN=C3L33_01060 PE=3 SV=1;tr|A0A834GMQ0|A0A834GMQ0_RHOSS Uncharacterized protein OS=Rhododendron simsii OX=118357 GN=RHSIM_Rhsim08G0124200 PE=3	NaN	25.0257	NaN	NaN	NaN	24.0309	43.888	17.259
tr|A0A834LB58|A0A834LB58_RHOSS;tr|A0A6A4L6V0|A0A6A4L6V0_9ERIC	tr|A0A834LB58|A0A834LB58_RHOSS CTP_transf_like domain-containing protein OS=Rhododendron simsii OX=118357 GN=RHSIM_Rhsim09G0103900 PE=4 SV=1;tr|A0A6A4L6V0|A0A6A4L6V0_9ERIC CTP_transf_like domain-containing protein (Fragment) OS=Rhododendron williamsianum O	NaN	25.6246	26.5318	NaN	NaN	25.6207	44.287	16.95
tr|A0A6A4KUR6|A0A6A4KUR6_9ERIC	tr|A0A6A4KUR6|A0A6A4KUR6_9ERIC Uncharacterized protein (Fragment) OS=Rhododendron williamsianum OX=262921 GN=C3L33_21563 PE=3 SV=1	NaN	NaN	NaN	25.3379	26.0301	25.2433	48.054	16.754
tr|A0A6A4MK32|A0A6A4MK32_9ERIC	tr|A0A6A4MK32|A0A6A4MK32_9ERIC Uncharacterized protein (Fragment) OS=Rhododendron williamsianum OX=262921 GN=C3L33_00483 PE=3 SV=1	24.0878	23.7737	24.2721	NaN	NaN	24.0569	90.798	16.583
tr|A0A834H4W8|A0A834H4W8_RHOSS;tr|A0A6A4LDK6|A0A6A4LDK6_9ERIC;tr|A0A834GWC7|A0A834GWC7_RHOSS;tr|A0A6A4LFT2|A0A6A4LFT2_9ERIC	tr|A0A834H4W8|A0A834H4W8_RHOSS Vesicle-fusing ATPase OS=Rhododendron simsii OX=118357 GN=RHSIM_Rhsim04G0021300 PE=3 SV=1;tr|A0A6A4LDK6|A0A6A4LDK6_9ERIC Vesicle-fusing ATPase (Fragment) OS=Rhododendron williamsianum OX=262921 GN=C3L33_11686 PE=3 SV=1;tr|A0A	24.0533	25.4731	23.2917	23.2193	NaN	22.8906	82.664	16.552
tr|A0A6A4LZD3|A0A6A4LZD3_9ERIC;tr|A0A6A4M7A2|A0A6A4M7A2_9ERIC;tr|A0A834G029|A0A834G029_RHOSS	tr|A0A6A4LZD3|A0A6A4LZD3_9ERIC Uncharacterized protein (Fragment) OS=Rhododendron williamsianum OX=262921 GN=C3L33_06655 PE=4 SV=1;tr|A0A6A4M7A2|A0A6A4M7A2_9ERIC Uncharacterized protein (Fragment) OS=Rhododendron williamsianum OX=262921 GN=C3L33_00908 PE=4	23.6681	NaN	24.8122	24.5579	NaN	NaN	166.25	16.364
tr|A0A6A4L8T3|A0A6A4L8T3_9ERIC;tr|A0A834LAV4|A0A834LAV4_RHOSS;tr|A0A834G2V3|A0A834G2V3_RHOSS;tr|A0A6A4M7Y5|A0A6A4M7Y5_9ERIC;tr|A0A834LEN8|A0A834LEN8_RHOSS;tr|A0A6A4L139|A0A6A4L139_9ERIC;tr|A0A6A4L0L4|A0A6A4L0L4_9ERIC;tr|A0A834GDK9|A0A834GDK9_RHOSS	tr|A0A6A4L8T3|A0A6A4L8T3_9ERIC Allene-oxide cyclase (Fragment) OS=Rhododendron williamsianum OX=262921 GN=C3L33_13428 PE=3 SV=1;tr|A0A834LAV4|A0A834LAV4_RHOSS Allene-oxide cyclase OS=Rhododendron simsii OX=118357 GN=RHSIM_Rhsim10G0063500 PE=3 SV=1;tr|A0A83	22.8534	NaN	NaN	NaN	NaN	21.621	22.909	16.088
tr|A0A6A4KUL8|A0A6A4KUL8_9ERIC;tr|A0A834LEX9|A0A834LEX9_RHOSS;tr|A0A6A4LYS4|A0A6A4LYS4_9ERIC;tr|A0A834FYA5|A0A834FYA5_RHOSS	tr|A0A6A4KUL8|A0A6A4KUL8_9ERIC Carboxypeptidase (Fragment) OS=Rhododendron williamsianum OX=262921 GN=C3L33_16792 PE=3 SV=1;tr|A0A834LEX9|A0A834LEX9_RHOSS Carboxypeptidase OS=Rhododendron simsii OX=118357 GN=RHSIM_Rhsim09G0147200 PE=3 SV=1;tr|A0A6A4LYS4|A0	NaN	23.9332	22.2226	NaN	24.2745	NaN	56.062	15.902
tr|A0A6A4KUR9|A0A6A4KUR9_9ERIC;tr|A0A834GHA3|A0A834GHA3_RHOSS;tr|A0A6A4M1N3|A0A6A4M1N3_9ERIC;tr|A0A6A4KCV3|A0A6A4KCV3_9ERIC;tr|A0A834GG43|A0A834GG43_RHOSS	tr|A0A6A4KUR9|A0A6A4KUR9_9ERIC Uncharacterized protein (Fragment) OS=Rhododendron williamsianum OX=262921 GN=C3L33_19081 PE=3 SV=1;tr|A0A834GHA3|A0A834GHA3_RHOSS Uncharacterized protein OS=Rhododendron simsii OX=118357 GN=RHSIM_Rhsim10G0001900 PE=3 SV=1;tr	23.1061	NaN	22.8268	NaN	NaN	NaN	34.581	15.868
tr|A0A834GLR0|A0A834GLR0_RHOSS;tr|A0A834GJ70|A0A834GJ70_RHOSS;tr|A0A834L6D5|A0A834L6D5_RHOSS;tr|A0A6A4MP17|A0A6A4MP17_9ERIC	tr|A0A834GLR0|A0A834GLR0_RHOSS Uncharacterized protein OS=Rhododendron simsii OX=118357 GN=RHSIM_Rhsim08G0221200 PE=4 SV=1;tr|A0A834GJ70|A0A834GJ70_RHOSS Uncharacterized protein OS=Rhododendron simsii OX=118357 GN=RHSIM_Rhsim08G0221100 PE=4 SV=1;tr|A0A834L	21.4277	NaN	NaN	21.5491	NaN	22.1811	103.7	15.818
tr|A0A834LFP2|A0A834LFP2_RHOSS;tr|A0A834L611|A0A834L611_RHOSS;tr|A0A834GFY5|A0A834GFY5_RHOSS;tr|A0A834LZE7|A0A834LZE7_RHOSS;tr|A0A834LIS3|A0A834LIS3_RHOSS;tr|A0A834GVZ4|A0A834GVZ4_RHOSS;tr|A0A834G514|A0A834G514_RHOSS	tr|A0A834LFP2|A0A834LFP2_RHOSS Uncharacterized protein OS=Rhododendron simsii OX=118357 GN=RHSIM_Rhsim08G0053200 PE=3 SV=1;tr|A0A834L611|A0A834L611_RHOSS Uncharacterized protein OS=Rhododendron simsii OX=118357 GN=RHSIM_Rhsim12G0044000 PE=3 SV=1;tr|A0A834G	23.9462	22.7687	NaN	NaN	NaN	NaN	24.177	15.78
tr|A0A6A4LRN4|A0A6A4LRN4_9ERIC;tr|A0A6A4LW53|A0A6A4LW53_9ERIC	tr|A0A6A4LRN4|A0A6A4LRN4_9ERIC Uncharacterized protein (Fragment) OS=Rhododendron williamsianum OX=262921 GN=C3L33_07406 PE=3 SV=1	27.4403	27.124	27.4402	26.9235	27.7044	28.1418	95.658	15.698
tr|A0A834GGF6|A0A834GGF6_RHOSS;tr|A0A6A4MNK6|A0A6A4MNK6_9ERIC	tr|A0A834GGF6|A0A834GGF6_RHOSS Uncharacterized protein OS=Rhododendron simsii OX=118357 GN=RHSIM_Rhsim08G0128800 PE=3 SV=1;tr|A0A6A4MNK6|A0A6A4MNK6_9ERIC Uncharacterized protein (Fragment) OS=Rhododendron williamsianum OX=262921 GN=C3L33_01015 PE=3 SV=1	21.0132	NaN	NaN	NaN	NaN	20.0528	61.239	15.628
tr|A0A834L7I4|A0A834L7I4_RHOSS;tr|A0A834L803|A0A834L803_RHOSS;tr|A0A6A4KNT6|A0A6A4KNT6_9ERIC	tr|A0A834L7I4|A0A834L7I4_RHOSS Uncharacterized protein OS=Rhododendron simsii OX=118357 GN=RHSIM_Rhsim11G0165900 PE=4 SV=1;tr|A0A834L803|A0A834L803_RHOSS Methionine S-methyltransferase OS=Rhododendron simsii OX=118357 GN=RHSIM_Rhsim11G0117400 PE=3 SV=1;tr|	24.6537	NaN	24.6137	NaN	NaN	NaN	88.128	15.171
tr|A0A834FTL5|A0A834FTL5_RHOSS	tr|A0A834FTL5|A0A834FTL5_RHOSS Uncharacterized protein OS=Rhododendron simsii OX=118357 GN=RHSIM_RhsimUnG0226200 PE=3 SV=1	NaN	NaN	NaN	24.0935	24.754	24.615	108.85	14.178
tr|A0A6A4LHK2|A0A6A4LHK2_9ERIC;tr|A0A834HBG6|A0A834HBG6_RHOSS	tr|A0A6A4LHK2|A0A6A4LHK2_9ERIC Uncharacterized protein (Fragment) OS=Rhododendron williamsianum OX=262921 GN=C3L33_12130 PE=4 SV=1;tr|A0A834HBG6|A0A834HBG6_RHOSS Uncharacterized protein OS=Rhododendron simsii OX=118357 GN=RHSIM_Rhsim04G0102400 PE=4 SV=1	NaN	NaN	NaN	25.0889	24.3848	24.5918	36.727	14.055
tr|A0A834GD15|A0A834GD15_RHOSS;tr|A0A6A4KU69|A0A6A4KU69_9ERIC	tr|A0A834GD15|A0A834GD15_RHOSS Uricase OS=Rhododendron simsii OX=118357 GN=RHSIM_Rhsim09G0141100 PE=3 SV=1;tr|A0A6A4KU69|A0A6A4KU69_9ERIC Urate oxidase (Fragment) OS=Rhododendron williamsianum OX=262921 GN=C3L33_16843 PE=3 SV=1	23.2124	22.0654	22.593	NaN	NaN	NaN	28.044	13.892
tr|A0A834G1J0|A0A834G1J0_RHOSS	tr|A0A834G1J0|A0A834G1J0_RHOSS 5-methyltetrahydropteroyltriglutamate--homocysteine S-methyltransferase OS=Rhododendron simsii OX=118357 GN=RHSIM_Rhsim13G0199800 PE=3 SV=1	NaN	NaN	22.8017	NaN	NaN	23.2736	99.628	13.703
tr|A0A6A4LG53|A0A6A4LG53_9ERIC;tr|A0A834H4R1|A0A834H4R1_RHOSS	tr|A0A6A4LG53|A0A6A4LG53_9ERIC Phenylalanyl-tRNA synthetase (Fragment) OS=Rhododendron williamsianum OX=262921 GN=C3L33_11448 PE=3 SV=1;tr|A0A834H4R1|A0A834H4R1_RHOSS Phenylalanyl-tRNA synthetase OS=Rhododendron simsii OX=118357 GN=RHSIM_Rhsim04G0004400 PE	NaN	NaN	24.513	24.3825	NaN	23.7908	53.45	13.516
tr|A0A834G1H3|A0A834G1H3_RHOSS;tr|A0A834LTE0|A0A834LTE0_RHOSS	tr|A0A834G1H3|A0A834G1H3_RHOSS GB1/RHD3-type G domain-containing protein OS=Rhododendron simsii OX=118357 GN=RHSIM_Rhsim13G0180600 PE=3 SV=1;tr|A0A834LTE0|A0A834LTE0_RHOSS GB1/RHD3-type G domain-containing protein OS=Rhododendron simsii OX=118357 GN=RHSIM_	23.2313	NaN	NaN	NaN	21.8592	NaN	121.51	13.384
tr|A0A6A4KPQ4|A0A6A4KPQ4_9ERIC	tr|A0A6A4KPQ4|A0A6A4KPQ4_9ERIC Aminotran_1_2 domain-containing protein (Fragment) OS=Rhododendron williamsianum OX=262921 GN=C3L33_22702 PE=4 SV=1	NaN	NaN	NaN	26.2866	NaN	26.0188	13.427	12.947
tr|A0A834HIK2|A0A834HIK2_RHOSS;tr|A0A6A4MBV5|A0A6A4MBV5_9ERIC;tr|A0A834GJR9|A0A834GJR9_RHOSS;tr|A0A6A4LGF1|A0A6A4LGF1_9ERIC;tr|A0A6A4LZK9|A0A6A4LZK9_9ERIC;tr|A0A6A4LA57|A0A6A4LA57_9ERIC;tr|A0A834LRH7|A0A834LRH7_RHOSS;tr|A0A834L7U7|A0A834L7U7_RHOSS;tr|A0A834HGN0|A0A834HGN0_RHOSS;tr|A0A6A4KUS6|A0A6A4KUS6_9ERIC;tr|A0A6A4LYP2|A0A6A4LYP2_9ERIC;tr|A0A834LP59|A0A834LP59_RHOSS;tr|A0A6A4MCG9|A0A6A4MCG9_9E…	tr|A0A834HIK2|A0A834HIK2_RHOSS UDP-glucuronate decarboxylase OS=Rhododendron simsii OX=118357 GN=RHSIM_Rhsim03G0132500 PE=3 SV=1;tr|A0A6A4MBV5|A0A6A4MBV5_9ERIC UDP-glucuronate decarboxylase (Fragment) OS=Rhododendron williamsianum OX=262921 GN=C3L33_02719	NaN	NaN	NaN	NaN	25.1605	24.986	42.719	12.455
tr|A0A834LZN0|A0A834LZN0_RHOSS;tr|A0A6A4LY11|A0A6A4LY11_9ERIC	tr|A0A834LZN0|A0A834LZN0_RHOSS Lactase OS=Rhododendron simsii OX=118357 GN=RHSIM_Rhsim01G0124100 PE=3 SV=1;tr|A0A6A4LY11|A0A6A4LY11_9ERIC Lactase (Fragment) OS=Rhododendron williamsianum OX=262921 GN=C3L33_05122 PE=3 SV=1	25.4945	NaN	NaN	NaN	24.546	NaN	183.86	12.381
tr|A0A834LY24|A0A834LY24_RHOSS;tr|A0A6A4M939|A0A6A4M939_9ERIC	tr|A0A834LY24|A0A834LY24_RHOSS Uncharacterized protein OS=Rhododendron simsii OX=118357 GN=RHSIM_Rhsim01G0263800 PE=3 SV=1;tr|A0A6A4M939|A0A6A4M939_9ERIC Uncharacterized protein (Fragment) OS=Rhododendron williamsianum OX=262921 GN=C3L33_04244 PE=3 SV=1	NaN	NaN	NaN	NaN	26.1787	24.5687	51.585	12.259
tr|A0A6A4MHM7|A0A6A4MHM7_9ERIC;tr|A0A834LFM3|A0A834LFM3_RHOSS	tr|A0A6A4MHM7|A0A6A4MHM7_9ERIC Uncharacterized protein (Fragment) OS=Rhododendron williamsianum OX=262921 GN=C3L33_01031 PE=3 SV=1;tr|A0A834LFM3|A0A834LFM3_RHOSS Uncharacterized protein OS=Rhododendron simsii OX=118357 GN=RHSIM_Rhsim08G0126700 PE=3 SV=1	24.7732	NaN	25.0509	NaN	NaN	NaN	92.31	12.21
tr|A0A6A4LW49|A0A6A4LW49_9ERIC;tr|A0A6A4KAR8|A0A6A4KAR8_9ERIC	tr|A0A6A4LW49|A0A6A4LW49_9ERIC SERPIN domain-containing protein (Fragment) OS=Rhododendron williamsianum OX=262921 GN=C3L33_09557 PE=3 SV=1;tr|A0A6A4KAR8|A0A6A4KAR8_9ERIC SERPIN domain-containing protein (Fragment) OS=Rhododendron williamsianum OX=262921 G	NaN	NaN	NaN	23.5356	23.7754	23.6503	42.757	11.885
tr|A0A6A4KV25|A0A6A4KV25_9ERIC	tr|A0A6A4KV25|A0A6A4KV25_9ERIC ADH_N domain-containing protein (Fragment) OS=Rhododendron williamsianum OX=262921 GN=C3L33_20951 PE=4 SV=1	NaN	NaN	NaN	26.1535	26.3782	25.5974	11.494	10.693
tr|A0A6A4L7J7|A0A6A4L7J7_9ERIC;tr|A0A834GLH4|A0A834GLH4_RHOSS	tr|A0A6A4L7J7|A0A6A4L7J7_9ERIC Uncharacterized protein (Fragment) OS=Rhododendron williamsianum OX=262921 GN=C3L33_16317 PE=3 SV=1;tr|A0A834GLH4|A0A834GLH4_RHOSS Uncharacterized protein OS=Rhododendron simsii OX=118357 GN=RHSIM_Rhsim09G0210100 PE=3 SV=1	25.042	NaN	NaN	NaN	25.0944	25.4081	39.907	8.9404
tr|A0A6A4LFW3|A0A6A4LFW3_9ERIC;tr|A0A834L6G3|A0A834L6G3_RHOSS;tr|A0A834GJ89|A0A834GJ89_RHOSS	tr|A0A6A4LFW3|A0A6A4LFW3_9ERIC Serine/threonine-protein phosphatase 2A 55 kDa regulatory subunit B (Fragment) OS=Rhododendron williamsianum OX=262921 GN=C3L33_14683 PE=3 SV=1;tr|A0A834L6G3|A0A834L6G3_RHOSS Serine/threonine-protein phosphatase 2A 55 kDa reg	18.6749	19.5811	NaN	NaN	NaN	NaN	38.628	8.6136
tr|Q5W4R9|Q5W4R9_ENKCH;tr|Q8SLU2|Q8SLU2_ENKCA;tr|Q9SCJ1|Q9SCJ1_ARCUU	tr|Q5W4R9|Q5W4R9_ENKCH ATP synthase subunit beta (Fragment) OS=Enkianthus chinensis OX=171226 GN=atpB PE=3 SV=1;tr|Q8SLU2|Q8SLU2_ENKCA ATP synthase subunit beta (Fragment) OS=Enkianthus campanulatus OX=13508 GN=atpB PE=3 SV=1	NaN	22.7803	NaN	NaN	NaN	24.1463	51.116	7.8072
tr|A0A834LSD4|A0A834LSD4_RHOSS;tr|A0A6A4LJP9|A0A6A4LJP9_9ERIC	tr|A0A834LSD4|A0A834LSD4_RHOSS D-fructose-1,6-bisphosphate 1-phosphohydrolase OS=Rhododendron simsii OX=118357 GN=RHSIM_Rhsim04G0164800 PE=3 SV=1;tr|A0A6A4LJP9|A0A6A4LJP9_9ERIC D-fructose-1,6-bisphosphate 1-phosphohydrolase (Fragment) OS=Rhododendron willi	NaN	24.7652	NaN	NaN	NaN	24.3413	46.32	6.831

## Sheet: Sicily
Protein IDs	Fasta headers	SG	SV	SR	Mol. weight [kDa]	Score
tr|A0A6A4KS07|A0A6A4KS07_9ERIC;tr|A0A834LQY4|A0A834LQY4_RHOSS;tr|A0A834LMD9|A0A834LMD9_RHOSS	tr|A0A6A4KS07|A0A6A4KS07_9ERIC Adenosine kinase (Fragment) OS=Rhododendron williamsianum OX=262921 GN=C3L33_20155 PE=3 SV=1;tr|A0A834LQY4|A0A834LQY4_RHOSS Adenosine kinase OS=Rhododendron simsii OX=118357 GN=RHSIM_Rhsim05G0179500 PE=3 SV=1	26.8667	28.1427	27.8761	41.72	323.31
tr|A0A834GED3|A0A834GED3_RHOSS;tr|A0A6A4KUM5|A0A6A4KUM5_9ERIC;tr|A0A834G2B8|A0A834G2B8_RHOSS;tr|A0A6A4L855|A0A6A4L855_9ERIC;tr|A0A834GJB5|A0A834GJB5_RHOSS	tr|A0A834GED3|A0A834GED3_RHOSS UDP-glucose 6-dehydrogenase OS=Rhododendron simsii OX=118357 GN=RHSIM_Rhsim10G0044100 PE=3 SV=1;tr|A0A6A4KUM5|A0A6A4KUM5_9ERIC UDP-glucose 6-dehydrogenase (Fragment) OS=Rhododendron williamsianum OX=262921 GN=C3L33_18764 PE=3	24.9835	25.8192	25.6922	53.026	323.31
tr|A0A834GAK6|A0A834GAK6_RHOSS;tr|A0A6A4KX31|A0A6A4KX31_9ERIC;tr|A0A6A4KSD0|A0A6A4KSD0_9ERIC;tr|A0A834HA53|A0A834HA53_RHOSS	tr|A0A834GAK6|A0A834GAK6_RHOSS PCI domain-containing protein OS=Rhododendron simsii OX=118357 GN=RHSIM_Rhsim11G0192900 PE=3 SV=1;tr|A0A6A4KX31|A0A6A4KX31_9ERIC PCI domain-containing protein (Fragment) OS=Rhododendron williamsianum OX=262921 GN=C3L33_20708	23.1547	24.2166	23.054	57.04	323.31
tr|A0A6A4KXS2|A0A6A4KXS2_9ERIC;tr|A0A6A4MFG7|A0A6A4MFG7_9ERIC;tr|A0A834LWL8|A0A834LWL8_RHOSS;tr|A0A834GFN7|A0A834GFN7_RHOSS	tr|A0A6A4KXS2|A0A6A4KXS2_9ERIC Alpha-galactosidase (Fragment) OS=Rhododendron williamsianum OX=262921 GN=C3L33_20443 PE=3 SV=1	28.2253	28.2998	28.7244	37.215	323.31
tr|A0A6A4L4F0|A0A6A4L4F0_9ERIC;tr|A0A834LU30|A0A834LU30_RHOSS;tr|A0A2Z5U6P2|A0A2Z5U6P2_KALPR	tr|A0A6A4L4F0|A0A6A4L4F0_9ERIC Epimerase domain-containing protein (Fragment) OS=Rhododendron williamsianum OX=262921 GN=C3L33_15021 PE=4 SV=1;tr|A0A834LU30|A0A834LU30_RHOSS Epimerase domain-containing protein OS=Rhododendron simsii OX=118357 GN=RHSIM_Rhsi	26.7787	27.8162	27.7723	42.606	323.31
tr|A0A6A4L8V2|A0A6A4L8V2_9ERIC	tr|A0A6A4L8V2|A0A6A4L8V2_9ERIC Uncharacterized protein (Fragment) OS=Rhododendron williamsianum OX=262921 GN=C3L33_15860 PE=4 SV=1	27.8415	28.7076	28.6377	35.778	323.31
tr|A0A6A4L930|A0A6A4L930_9ERIC;tr|X5I326|X5I326_9ERIC;tr|Q8L6D2|Q8L6D2_RHOSS;tr|A0A2Z5QL08|A0A2Z5QL08_RHODA;tr|A0A834FUH5|A0A834FUH5_RHOSS;tr|A0A834FV40|A0A834FV40_RHOSS;tr|A0A4Y6JLW5|A0A4Y6JLW5_9ERIC;tr|A0A834LV68|A0A834LV68_RHOSS;tr|H6UKR4|H6UKR4_VACCO;tr|A0A4Y6JM43|A0A4Y6JM43_9ERIC;tr|A0A6A4KYP5|A0A6A4KYP5_9ERIC;tr|X5IG77|X5IG77_9ERIC;tr|A0A068PWE3|A0A068PWE3_CASLY;tr|A0A068PXK4|A0A068PXK4_9ER…	tr|A0A6A4L930|A0A6A4L930_9ERIC Uncharacterized protein (Fragment) OS=Rhododendron williamsianum OX=262921 GN=C3L33_15158 PE=3 SV=1;tr|X5I326|X5I326_9ERIC Chalcone synthase OS=Vaccinium ashei OX=945837 GN=CHS2 PE=2 SV=1;tr|Q8L6D2|Q8L6D2_RHOSS Chalcone synth	NaN	NaN	27.4502	44.751	323.31
tr|A0A6A4LBG3|A0A6A4LBG3_9ERIC;tr|A0A834G2F1|A0A834G2F1_RHOSS	tr|A0A6A4LBG3|A0A6A4LBG3_9ERIC Glyceraldehyde-3-phosphate dehydrogenase (Fragment) OS=Rhododendron williamsianum OX=262921 GN=C3L33_13280 PE=3 SV=1;tr|A0A834G2F1|A0A834G2F1_RHOSS Glyceraldehyde-3-phosphate dehydrogenase OS=Rhododendron simsii OX=118357 GN=	26.885	25.753	26.1127	40.963	323.31
tr|A0A6A4LE63|A0A6A4LE63_9ERIC;tr|A0A834L389|A0A834L389_RHOSS;tr|A0A6A4LUX3|A0A6A4LUX3_9ERIC;tr|A0A6A4KK97|A0A6A4KK97_9ERIC;tr|A0A6A4LV75|A0A6A4LV75_9ERIC	tr|A0A6A4LE63|A0A6A4LE63_9ERIC Uncharacterized protein (Fragment) OS=Rhododendron williamsianum OX=262921 GN=C3L33_11578 PE=3 SV=1;tr|A0A834L389|A0A834L389_RHOSS Uncharacterized protein OS=Rhododendron simsii OX=118357 GN=RHSIM_RhsimUnG0250200 PE=3 SV=1	27.2586	26.8758	NaN	112.5	323.31
tr|A0A6A4LQC1|A0A6A4LQC1_9ERIC;tr|A0A6A4LR70|A0A6A4LR70_9ERIC;tr|A0A6A4L4Q2|A0A6A4L4Q2_9ERIC;tr|A0A6A4L1X2|A0A6A4L1X2_9ERIC;tr|A0A834GX81|A0A834GX81_RHOSS;tr|A0A834G9H8|A0A834G9H8_RHOSS;tr|A0A834GE04|A0A834GE04_RHOSS	tr|A0A6A4LQC1|A0A6A4LQC1_9ERIC Catalase (Fragment) OS=Rhododendron williamsianum OX=262921 GN=C3L33_09406 PE=3 SV=1;tr|A0A6A4LR70|A0A6A4LR70_9ERIC Catalase (Fragment) OS=Rhododendron williamsianum OX=262921 GN=C3L33_11250 PE=3 SV=1;tr|A0A6A4L4Q2|A0A6A4L4Q2	25.2104	25.3727	26.2473	53.439	323.31
tr|A0A6A4LQJ5|A0A6A4LQJ5_9ERIC;tr|A0A834GWU3|A0A834GWU3_RHOSS	tr|A0A6A4LQJ5|A0A6A4LQJ5_9ERIC Tr-type G domain-containing protein (Fragment) OS=Rhododendron williamsianum OX=262921 GN=C3L33_09667 PE=3 SV=1;tr|A0A834GWU3|A0A834GWU3_RHOSS Uncharacterized protein OS=Rhododendron simsii OX=118357 GN=RHSIM_Rhsim06G0239600	28.2355	28.4662	27.3554	93.654	323.31
tr|A0A6A4M0Y7|A0A6A4M0Y7_9ERIC	tr|A0A6A4M0Y7|A0A6A4M0Y7_9ERIC Lipoxygenase (Fragment) OS=Rhododendron williamsianum OX=262921 GN=C3L33_05810 PE=3 SV=1	28.1746	26.8987	26.0788	58.014	323.31
tr|A0A6A4M2P9|A0A6A4M2P9_9ERIC;tr|A0A834G4H8|A0A834G4H8_RHOSS;tr|A0A6A4LG01|A0A6A4LG01_9ERIC;tr|A0A834LSW9|A0A834LSW9_RHOSS;tr|A0A834FUP7|A0A834FUP7_RHOSS	tr|A0A6A4M2P9|A0A6A4M2P9_9ERIC 40S ribosomal protein S8 (Fragment) OS=Rhododendron williamsianum OX=262921 GN=C3L33_07250 PE=3 SV=1;tr|A0A834G4H8|A0A834G4H8_RHOSS 40S ribosomal protein S8 OS=Rhododendron simsii OX=118357 GN=RHSIM_Rhsim13G0050700 PE=3 SV=1	25.6751	25.5295	26.4586	30.75	323.31
tr|A0A6A4M3B6|A0A6A4M3B6_9ERIC;tr|A0A834G455|A0A834G455_RHOSS;tr|A0A834LIA3|A0A834LIA3_RHOSS;tr|A0A6A4MCH3|A0A6A4MCH3_9ERIC	tr|A0A6A4M3B6|A0A6A4M3B6_9ERIC Uncharacterized protein (Fragment) OS=Rhododendron williamsianum OX=262921 GN=C3L33_06831 PE=4 SV=1;tr|A0A834G455|A0A834G455_RHOSS Uncharacterized protein OS=Rhododendron simsii OX=118357 GN=RHSIM_Rhsim13G0098600 PE=4 SV=1	25.5476	26.1438	27.0698	99.392	323.31
tr|A0A6A4M8Z6|A0A6A4M8Z6_9ERIC;tr|A0A834HJ59|A0A834HJ59_RHOSS	tr|A0A6A4M8Z6|A0A6A4M8Z6_9ERIC Alba domain-containing protein (Fragment) OS=Rhododendron williamsianum OX=262921 GN=C3L33_04306 PE=4 SV=1;tr|A0A834HJ59|A0A834HJ59_RHOSS Alba domain-containing protein OS=Rhododendron simsii OX=118357 GN=RHSIM_Rhsim01G025750	NaN	NaN	23.9274	36.928	323.31
tr|A0A6A4M9R1|A0A6A4M9R1_9ERIC	tr|A0A6A4M9R1|A0A6A4M9R1_9ERIC Sucrose synthase (Fragment) OS=Rhododendron williamsianum OX=262921 GN=C3L33_04010 PE=3 SV=1	28.0605	27.4308	27.5032	93.034	323.31
tr|D6MMT2|D6MMT2_9ERIC;tr|A0A834G033|A0A834G033_RHOSS;tr|A0A1P8NPT1|A0A1P8NPT1_9ERIC;tr|A0A834LYD5|A0A834LYD5_RHOSS;tr|A0A834HM85|A0A834HM85_RHOSS;tr|A0A834FZ60|A0A834FZ60_RHOSS;tr|A0A834LSH9|A0A834LSH9_RHOSS;tr|A0A834LUC6|A0A834LUC6_RHOSS;tr|A0A834L4L3|A0A834L4L3_RHOSS;tr|A0A834FTW0|A0A834FTW0_RHOSS;tr|A0A834FX39|A0A834FX39_RHOSS;tr|A0A834G050|A0A834G050_RHOSS;tr|A0A834L6H5|A0A834L6H5_RHOSS;tr|A…	tr|D6MMT2|D6MMT2_9ERIC Heat shock protein 70 OS=Rhododendron calophytum OX=479660 PE=2 SV=1;tr|A0A834G033|A0A834G033_RHOSS Uncharacterized protein OS=Rhododendron simsii OX=118357 GN=RHSIM_Rhsim13G0084100 PE=3 SV=1;tr|A0A1P8NPT1|A0A1P8NPT1_9ERIC Heat shock	29.8568	29.5051	30.1368	71.192	323.31
tr|A0A834G647|A0A834G647_RHOSS;tr|A0A6A4KWZ7|A0A6A4KWZ7_9ERIC	tr|A0A834G647|A0A834G647_RHOSS Protein kinase domain-containing protein OS=Rhododendron simsii OX=118357 GN=RHSIM_Rhsim11G0176000 PE=3 SV=1;tr|A0A6A4KWZ7|A0A6A4KWZ7_9ERIC Uncharacterized protein (Fragment) OS=Rhododendron williamsianum OX=262921 GN=C3L33_2	27.2623	27.784	27.1832	151.83	323.31
tr|X5I323|X5I323_9ERIC;tr|A0A834GAI3|A0A834GAI3_RHOSS;tr|A0A6A4KQ81|A0A6A4KQ81_9ERIC;tr|A0A834LDN6|A0A834LDN6_RHOSS;tr|A0A6A4KVY8|A0A6A4KVY8_9ERIC;tr|F8WQK9|F8WQK9_9ERIC	tr|X5I323|X5I323_9ERIC Action OS=Vaccinium ashei OX=945837 GN=ACT PE=2 SV=1;tr|A0A834GAI3|A0A834GAI3_RHOSS Uncharacterized protein OS=Rhododendron simsii OX=118357 GN=RHSIM_Rhsim10G0141300 PE=3 SV=1;tr|A0A6A4KQ81|A0A6A4KQ81_9ERIC Uncharacterized protein (F	29.9166	30.2024	30.6082	41.695	323.31
tr|A0A834GBJ7|A0A834GBJ7_RHOSS	tr|A0A834GBJ7|A0A834GBJ7_RHOSS Glutamine synthetase OS=Rhododendron simsii OX=118357 GN=RHSIM_Rhsim10G0178400 PE=3 SV=1	28.4917	28.577	28.5686	39.2	323.31
tr|A0A834GGW3|A0A834GGW3_RHOSS;tr|A0A6A4KZN0|A0A6A4KZN0_9ERIC;tr|A0A834GEG2|A0A834GEG2_RHOSS	tr|A0A834GGW3|A0A834GGW3_RHOSS ATP synthase subunit beta OS=Rhododendron simsii OX=118357 GN=RHSIM_Rhsim09G0069100 PE=3 SV=1;tr|A0A6A4KZN0|A0A6A4KZN0_9ERIC H(+)-transporting two-sector ATPase (Fragment) OS=Rhododendron williamsianum OX=262921 GN=C3L33_1713	26.5958	26.9445	26.5434	64.811	323.31
tr|A0A834GJK7|A0A834GJK7_RHOSS	tr|A0A834GJK7|A0A834GJK7_RHOSS Phospholipase D OS=Rhododendron simsii OX=118357 GN=RHSIM_Rhsim08G0214000 PE=3 SV=1	27.3283	27.1229	26.4126	92.13	323.31
tr|A0A834GKB3|A0A834GKB3_RHOSS;tr|A0A6A4MF27|A0A6A4MF27_9ERIC	tr|A0A834GKB3|A0A834GKB3_RHOSS V-ATPase 69 kDa subunit OS=Rhododendron simsii OX=118357 GN=RHSIM_Rhsim08G0250100 PE=3 SV=1;tr|A0A6A4MF27|A0A6A4MF27_9ERIC V-ATPase 69 kDa subunit (Fragment) OS=Rhododendron williamsianum OX=262921 GN=C3L33_00028 PE=3 SV=1	26.1621	26.5759	26.6827	68.9	323.31
tr|A0A834GM81|A0A834GM81_RHOSS;tr|A0A6A4MQ87|A0A6A4MQ87_9ERIC;tr|A0A834HBC0|A0A834HBC0_RHOSS	tr|A0A834GM81|A0A834GM81_RHOSS Coatomer subunit beta OS=Rhododendron simsii OX=118357 GN=RHSIM_Rhsim08G0248400 PE=4 SV=1;tr|A0A6A4MQ87|A0A6A4MQ87_9ERIC Uncharacterized protein (Fragment) OS=Rhododendron williamsianum OX=262921 GN=C3L33_00043 PE=4 SV=1	27.2404	28.5988	27.6931	105.79	323.31
tr|A0A834GRA6|A0A834GRA6_RHOSS	tr|A0A834GRA6|A0A834GRA6_RHOSS Pectin acetylesterase OS=Rhododendron simsii OX=118357 GN=RHSIM_Rhsim07G0141400 PE=3 SV=1	23.5791	24.9813	24.2681	54.141	323.31
tr|A0A834GY77|A0A834GY77_RHOSS;tr|A0A6A4LY78|A0A6A4LY78_9ERIC	tr|A0A834GY77|A0A834GY77_RHOSS Aminotran_1_2 domain-containing protein OS=Rhododendron simsii OX=118357 GN=RHSIM_Rhsim07G0102700 PE=3 SV=1;tr|A0A6A4LY78|A0A6A4LY78_9ERIC Aminotran_1_2 domain-containing protein (Fragment) OS=Rhododendron williamsianum OX=26	27.166	26.6697	25.8299	87.382	323.31
tr|A0A834H2L4|A0A834H2L4_RHOSS	tr|A0A834H2L4|A0A834H2L4_RHOSS ATP citrate synthase OS=Rhododendron simsii OX=118357 GN=RHSIM_Rhsim04G0239000 PE=4 SV=1	26.4837	26.2586	25.925	63.913	323.31
tr|A0A834LFK9|A0A834LFK9_RHOSS;tr|A0A6A4KVG6|A0A6A4KVG6_9ERIC;tr|A0A834L2F9|A0A834L2F9_RHOSS	tr|A0A834LFK9|A0A834LFK9_RHOSS Clathrin heavy chain OS=Rhododendron simsii OX=118357 GN=RHSIM_Rhsim09G0178400 PE=3 SV=1	27.4433	28.8464	29.0119	193.03	323.31
tr|A0A834LFU7|A0A834LFU7_RHOSS;tr|A0A6A4MJ90|A0A6A4MJ90_9ERIC	tr|A0A834LFU7|A0A834LFU7_RHOSS Elongation factor Tu OS=Rhododendron simsii OX=118357 GN=RHSIM_Rhsim08G0178200 PE=3 SV=1;tr|A0A6A4MJ90|A0A6A4MJ90_9ERIC Uncharacterized protein (Fragment) OS=Rhododendron williamsianum OX=262921 GN=C3L33_00628 PE=3 SV=1	26.6064	26.5188	26.3589	50.049	323.31
tr|A0A834LPM3|A0A834LPM3_RHOSS	tr|A0A834LPM3|A0A834LPM3_RHOSS Oxoglutarate dehydrogenase (succinyl-transferring) OS=Rhododendron simsii OX=118357 GN=RHSIM_Rhsim03G0127100 PE=3 SV=1	26.6321	25.967	26.2409	149.11	323.31
tr|A0A834LTJ3|A0A834LTJ3_RHOSS;tr|A0A6A4M6F4|A0A6A4M6F4_9ERIC	tr|A0A834LTJ3|A0A834LTJ3_RHOSS Phosphopyruvate hydratase OS=Rhododendron simsii OX=118357 GN=RHSIM_Rhsim03G0171300 PE=3 SV=1;tr|A0A6A4M6F4|A0A6A4M6F4_9ERIC Phosphopyruvate hydratase (Fragment) OS=Rhododendron williamsianum OX=262921 GN=C3L33_03123 PE=3 SV=	28.4417	27.5889	27.5174	45.741	323.31
tr|A0A834LTN6|A0A834LTN6_RHOSS	tr|A0A834LTN6|A0A834LTN6_RHOSS 5-methyltetrahydropteroyltriglutamate--homocysteine S-methyltransferase OS=Rhododendron simsii OX=118357 GN=RHSIM_Rhsim03G0053000 PE=3 SV=1	29.4832	29.3996	29.2987	89.368	323.31
tr|A0A834LV15|A0A834LV15_RHOSS;tr|A0A6A4KXR9|A0A6A4KXR9_9ERIC	tr|A0A834LV15|A0A834LV15_RHOSS Aspartate aminotransferase OS=Rhododendron simsii OX=118357 GN=RHSIM_Rhsim02G0181400 PE=3 SV=1;tr|A0A6A4KXR9|A0A6A4KXR9_9ERIC Aspartate aminotransferase (Fragment) OS=Rhododendron williamsianum OX=262921 GN=C3L33_15804 PE=3 S	28.9957	29.0059	28.9545	51.486	323.31
tr|A0A834LWF2|A0A834LWF2_RHOSS;tr|A0A6A4L5M7|A0A6A4L5M7_9ERIC;tr|A0A834LHR4|A0A834LHR4_RHOSS;tr|A0A6A4LUU4|A0A6A4LUU4_9ERIC	tr|A0A834LWF2|A0A834LWF2_RHOSS Protein transport protein SEC23 OS=Rhododendron simsii OX=118357 GN=RHSIM_Rhsim02G0069600 PE=3 SV=1;tr|A0A6A4L5M7|A0A6A4L5M7_9ERIC Protein transport protein SEC23 (Fragment) OS=Rhododendron williamsianum OX=262921 GN=C3L33_15	24.6568	24.3249	24.6236	88.781	323.31
tr|Q31779|Q31779_ARBCA;tr|U3G063|U3G063_ARBUN;tr|A0A0A7NX68|A0A0A7NX68_ARBUN;tr|A0A0F7EWA3|A0A0F7EWA3_ARCAL;tr|A0A6F8SNM0|A0A6F8SNM0_9ERIC;tr|A0A0F7G516|A0A0F7G516_9ERIC;tr|Q71N68|Q71N68_RHOGE;sp|P28447|RBL_RHOHI;tr|Q37157|Q37157_ARDCR;tr|Q8SLM1|Q8SLM1_EM	tr|Q31779|Q31779_ARBCA Ribulose bisphosphate carboxylase large chain (Fragment) OS=Arbutus canariensis OX=13343 GN=rbcL PE=3 SV=2;tr|U3G063|U3G063_ARBUN Ribulose bisphosphate carboxylase large chain OS=Arbutus unedo OX=84005 GN=rbcL PE=3 SV=1;tr|A0A0A7NX68	30.3049	28.9096	28.7154	51.63	323.31
tr|V9PBV0|V9PBV0_VACMA;tr|B0FA00|B0FA00_9ERIC;tr|A0A7M1LC10|A0A7M1LC10_RHOSS;tr|A0A834FY43|A0A834FY43_RHOSS;tr|Q8SIC5|Q8SIC5_9ERIC;tr|E5LEZ4|E5LEZ4_9ERIC;tr|E5LEY5|E5LEY5_9ERIC;tr|I1ZHA6|I1ZHA6_9ERIC;tr|E5DK37|E5DK37_ARBCA;tr|Q8SIG1|Q8SIG1_CHIUM;tr|Q3ZMK4|Q3ZMK4_RHOIM;tr|Q8SIF3|Q8SIF3_EMPNI;tr|Q8SIF2|Q8SIF2_ENKCA;tr|A0A834FX42|A0A834FX42_RHOSS;tr|A0A834GQW4|A0A834GQW4_RHOSS;tr|A0A834HDE9|A0A834HD…	tr|V9PBV0|V9PBV0_VACMA ATP synthase subunit alpha OS=Vaccinium macrocarpon OX=13750 GN=atp1 PE=3 SV=1;tr|B0FA00|B0FA00_9ERIC ATP synthase subunit alpha (Fragment) OS=Vaccinium arboreum OX=229201 GN=atp1 PE=3 SV=1;tr|A0A7M1LC10|A0A7M1LC10_RHOSS ATP synthase	27.4002	28.0079	28.5842	55.47	323.31
tr|A0A834G7U1|A0A834G7U1_RHOSS;tr|A0A834GBK9|A0A834GBK9_RHOSS;tr|A0A834GB13|A0A834GB13_RHOSS;tr|A0A834G6Q5|A0A834G6Q5_RHOSS;tr|A0A6A4KQ06|A0A6A4KQ06_9ERIC;tr|A0A6A4KU14|A0A6A4KU14_9ERIC;tr|A0A834L8A4|A0A834L8A4_RHOSS;tr|A0A834G3D1|A0A834G3D1_RHOSS;tr|A0A834GG45|A0A834GG45_RHOSS;tr|A0A6A4KSQ7|A0A6A4KSQ7_9ERIC;tr|A0A6A4L7B3|A0A6A4L7B3_9ERIC;tr|A0A6A4KMD0|A0A6A4KMD0_9ERIC;tr|A0A6A4KXJ2|A0A6A4KXJ2_9E…	tr|A0A834G7U1|A0A834G7U1_RHOSS Uncharacterized protein OS=Rhododendron simsii OX=118357 GN=RHSIM_Rhsim11G0041300 PE=3 SV=1;tr|A0A834GBK9|A0A834GBK9_RHOSS Uncharacterized protein OS=Rhododendron simsii OX=118357 GN=RHSIM_Rhsim08G0179700 PE=3 SV=1;tr|A0A834G	27.7804	28.5311	28.9034	46.741	313.57
tr|A0A834LLS5|A0A834LLS5_RHOSS;tr|A0A834GRJ6|A0A834GRJ6_RHOSS;tr|A0A834LIQ2|A0A834LIQ2_RHOSS;tr|A0A6A4LQW0|A0A6A4LQW0_9ERIC;tr|A0A6A4LFF1|A0A6A4LFF1_9ERIC;tr|A0A6A4M114|A0A6A4M114_9ERIC	tr|A0A834LLS5|A0A834LLS5_RHOSS Aspartate--tRNA ligase OS=Rhododendron simsii OX=118357 GN=RHSIM_Rhsim07G0113300 PE=3 SV=1;tr|A0A834GRJ6|A0A834GRJ6_RHOSS Aspartate--tRNA ligase OS=Rhododendron simsii OX=118357 GN=RHSIM_Rhsim07G0113700 PE=3 SV=1;tr|A0A834LIQ	25.7889	25.973	26.2864	59.944	308.49
tr|V9PBK9|V9PBK9_VACMA;tr|A0A7M1LDS3|A0A7M1LDS3_RHOSS;tr|A0A834G042|A0A834G042_RHOSS	tr|V9PBK9|V9PBK9_VACMA NADH dehydrogenase subunit 7 OS=Vaccinium macrocarpon OX=13750 GN=nad7 PE=3 SV=1;tr|A0A7M1LDS3|A0A7M1LDS3_RHOSS NADH dehydrogenase subunit 7 OS=Rhododendron simsii OX=118357 GN=nad7 PE=3 SV=1;tr|A0A834G042|A0A834G042_RHOSS Complex1_4	26.1993	26.911	26.4441	44.385	299.99
tr|U3G044|U3G044_ARBUN;tr|A0A6H1U989|A0A6H1U989_9ERIC;tr|D3WCQ6|D3WCQ6_RHOSS;tr|A0A1B0ZEW4|A0A1B0ZEW4_9ERIC;tr|A0A1B1CZM3|A0A1B1CZM3_9ERIC;tr|A0A8F5CDG6|A0A8F5CDG6_9ERIC;tr|A0A8F5CD03|A0A8F5CD03_9ERIC;tr|A0A8F5CCW9|A0A8F5CCW9_9ERIC;tr|A0A8F3ELJ4|A0A8F3ELJ4_RHOML;tr|A0A8E5N7Q9|A0A8E5N7Q9_9ERIC;tr|A0A898CTL6|A0A898CTL6_9ERIC;tr|A0A7M1ICH1|A0A7M1ICH1_9ERIC;tr|A0A7D5JLC7|A0A7D5JLC7_9ERIC;tr|A0A6B9JDH…	tr|U3G044|U3G044_ARBUN ATP synthase subunit alpha, chloroplastic OS=Arbutus unedo OX=84005 GN=atpA PE=3 SV=1;tr|A0A6H1U989|A0A6H1U989_9ERIC ATP synthase subunit alpha, chloroplastic OS=Rhododendron delavayi var. delavayi OX=1495201 GN=atpA PE=3 SV=1;tr|D3W	27.8334	27.5426	27.3561	55.262	296.33
tr|A0A6A4KZB6|A0A6A4KZB6_9ERIC;tr|A0A834GCT9|A0A834GCT9_RHOSS	tr|A0A6A4KZB6|A0A6A4KZB6_9ERIC UDP-arabinopyranose mutase (Fragment) OS=Rhododendron williamsianum OX=262921 GN=C3L33_18723 PE=3 SV=1;tr|A0A834GCT9|A0A834GCT9_RHOSS UDP-arabinopyranose mutase OS=Rhododendron simsii OX=118357 GN=RHSIM_Rhsim10G0056100 PE=3 S	NaN	25.1855	25.3282	41.64	293.01
tr|A0A834GZK8|A0A834GZK8_RHOSS;tr|A0A6A4KZ65|A0A6A4KZ65_9ERIC	tr|A0A834GZK8|A0A834GZK8_RHOSS Eukaryotic translation initiation factor 3 subunit A OS=Rhododendron simsii OX=118357 GN=RHSIM_Rhsim05G0135800 PE=3 SV=1;tr|A0A6A4KZ65|A0A6A4KZ65_9ERIC PCI domain-containing protein (Fragment) OS=Rhododendron williamsianum OX	NaN	24.0541	24.2307	110.7	288.05
tr|A0A834G9N6|A0A834G9N6_RHOSS;tr|A0A6A4LCV3|A0A6A4LCV3_9ERIC;tr|A0A834G743|A0A834G743_RHOSS	tr|A0A834G9N6|A0A834G9N6_RHOSS UDP-arabinopyranose mutase OS=Rhododendron simsii OX=118357 GN=RHSIM_Rhsim12G0149600 PE=3 SV=1;tr|A0A6A4LCV3|A0A6A4LCV3_9ERIC UDP-arabinopyranose mutase (Fragment) OS=Rhododendron williamsianum OX=262921 GN=C3L33_14210 PE=3 S	29.9973	29.1842	29.488	40.87	287.48
tr|A0A834HIX9|A0A834HIX9_RHOSS;tr|A0A6A4LAU6|A0A6A4LAU6_9ERIC;tr|I1U4K8|I1U4K8_9ERIC;tr|A0A6A4LH25|A0A6A4LH25_9ERIC;tr|A0A6A4KIP4|A0A6A4KIP4_9ERIC;tr|A0A834GTK1|A0A834GTK1_RHOSS	tr|A0A834HIX9|A0A834HIX9_RHOSS Malate dehydrogenase OS=Rhododendron simsii OX=118357 GN=RHSIM_Rhsim02G0037400 PE=3 SV=1;tr|A0A6A4LAU6|A0A6A4LAU6_9ERIC Malate dehydrogenase (Fragment) OS=Rhododendron williamsianum OX=262921 GN=C3L33_15068 PE=3 SV=1;tr|I1U4K	NaN	NaN	24.1443	88.91	286.22
tr|A0A6A4LR12|A0A6A4LR12_9ERIC	tr|A0A6A4LR12|A0A6A4LR12_9ERIC Uncharacterized protein (Fragment) OS=Rhododendron williamsianum OX=262921 GN=C3L33_10269 PE=3 SV=1	26.939	25.771	25.157	42.558	286.02
tr|A0A834LV39|A0A834LV39_RHOSS;tr|A0A6A4LBI2|A0A6A4LBI2_9ERIC;tr|A0A834LX87|A0A834LX87_RHOSS;tr|A0A6A4L9G2|A0A6A4L9G2_9ERIC;tr|G3BG93|G3BG93_9ERIC;tr|L8AXE9|L8AXE9_PHYNP;tr|G3BG84|G3BG84_9ERIC;tr|K4EJU6|K4EJU6_RHOSB;tr|K4EJS6|K4EJS6_9ERIC;tr|K4EJI2|K4EJI2_9ERIC;tr|G3BG99|G3BG99_9ERIC;tr|G3BG98|G3BG98_9ERIC;tr|G3BG97|G3BG97_9ERIC;tr|G3BG91|G3BG91_9ERIC;tr|G3BG95|G3BG95_9ERIC;tr|G3BG83|G3BG83_9ERIC…	tr|A0A834LV39|A0A834LV39_RHOSS 40S ribosomal protein SA OS=Rhododendron simsii OX=118357 GN=RHSIM_Rhsim02G0252600 PE=3 SV=1;tr|A0A6A4LBI2|A0A6A4LBI2_9ERIC Uncharacterized protein (Fragment) OS=Rhododendron williamsianum OX=262921 GN=C3L33_16195 PE=3 SV=1;t	29.5657	28.6209	28.8749	46.922	285.55
tr|A0A6A4KNX2|A0A6A4KNX2_9ERIC	tr|A0A6A4KNX2|A0A6A4KNX2_9ERIC Alpha-1,4 glucan phosphorylase (Fragment) OS=Rhododendron williamsianum OX=262921 GN=C3L33_18765 PE=3 SV=1	25.086	26.0106	25.3286	106.8	280.14
tr|A0A834GTU4|A0A834GTU4_RHOSS;tr|A0A834LS08|A0A834LS08_RHOSS;tr|A0A6A4LBE0|A0A6A4LBE0_9ERIC;tr|A0A6A4L911|A0A6A4L911_9ERIC	tr|A0A834GTU4|A0A834GTU4_RHOSS Uncharacterized protein OS=Rhododendron simsii OX=118357 GN=RHSIM_Rhsim07G0079900 PE=3 SV=1;tr|A0A834LS08|A0A834LS08_RHOSS Uncharacterized protein OS=Rhododendron simsii OX=118357 GN=RHSIM_Rhsim02G0248700 PE=4 SV=1;tr|A0A6A4L	24.9499	23.2055	24.2453	73.612	277
tr|A0A6A4KY05|A0A6A4KY05_9ERIC;tr|A0A834GEG5|A0A834GEG5_RHOSS;tr|A0A834GI20|A0A834GI20_RHOSS;tr|A0A292GD22|A0A292GD22_PHYNP;tr|A0A292GC44|A0A292GC44_9ERIC;tr|A0A292GBA0|A0A292GBA0_PHYEM;tr|A0A292GB63|A0A292GB63_9ERIC;tr|A0A292G606|A0A292G606_9ERIC;tr|A0A292G4P3|A0A292G4P3_PHYCU;tr|A0A2Z5VG13|A0A2Z5VG13_9ERIC;tr|A0A292GBA9|A0A292GBA9_9ERIC;tr|A0A2Z5VFQ2|A0A2Z5VFQ2_9ERIC	tr|A0A6A4KY05|A0A6A4KY05_9ERIC Iso_dh domain-containing protein (Fragment) OS=Rhododendron williamsianum OX=262921 GN=C3L33_17956 PE=3 SV=1;tr|A0A834GEG5|A0A834GEG5_RHOSS Isocitrate dehydrogenase [NADP] OS=Rhododendron simsii OX=118357 GN=RHSIM_Rhsim10G018	27.6758	27.3478	28.3693	45.271	270.29
tr|A0A6A4L1L1|A0A6A4L1L1_9ERIC;tr|A0A834L5K6|A0A834L5K6_RHOSS	tr|A0A6A4L1L1|A0A6A4L1L1_9ERIC Diadenosine tetraphosphate synthetase (Fragment) OS=Rhododendron williamsianum OX=262921 GN=C3L33_14504 PE=3 SV=1;tr|A0A834L5K6|A0A834L5K6_RHOSS Diadenosine tetraphosphate synthetase OS=Rhododendron simsii OX=118357 GN=RHSIM_	26.9076	26.8301	27.166	67.065	268.7
tr|A0A834GBR1|A0A834GBR1_RHOSS	tr|A0A834GBR1|A0A834GBR1_RHOSS Iso_dh domain-containing protein OS=Rhododendron simsii OX=118357 GN=RHSIM_Rhsim10G0199600 PE=3 SV=1	26.6697	27.497	27.1783	36.892	268.56
tr|A0A834HBZ4|A0A834HBZ4_RHOSS;tr|A0A6A4L412|A0A6A4L412_9ERIC;tr|A0A834GHF5|A0A834GHF5_RHOSS;tr|A0A834LG53|A0A834LG53_RHOSS	tr|A0A834HBZ4|A0A834HBZ4_RHOSS Adenosylhomocysteinase OS=Rhododendron simsii OX=118357 GN=RHSIM_Rhsim02G0062100 PE=3 SV=1;tr|A0A6A4L412|A0A6A4L412_9ERIC Adenosylhomocysteinase (Fragment) OS=Rhododendron williamsianum OX=262921 GN=C3L33_15205 PE=3 SV=1	27.929	28.1442	27.9543	53.219	265.85
tr|U3G064|U3G064_ARBUN;tr|Q9M4Q3|Q9M4Q3_ARBUN;tr|A0A8F5CCN1|A0A8F5CCN1_9ERIC;tr|A0A7M1ICN3|A0A7M1ICN3_9ERIC;tr|A0A6B9JJC9|A0A6B9JJC9_9ERIC;tr|A0A6H1U801|A0A6H1U801_9ERIC;tr|A0A7D5FGS8|A0A7D5FGS8_9ERIC;tr|Q8SLS3|Q8SLS3_9ERIC;tr|A0A4D6PZL8|A0A4D6PZL8_9ERIC;tr|A0A1X9PJ48|A0A1X9PJ48_9ERIC;tr|A0A1X9PLR4|A0A1X9PLR4_9ERIC;tr|A0A1X9PMB3|A0A1X9PMB3_9ERIC;tr|A0A1X9PPP1|A0A1X9PPP1_9ERIC;tr|A0A8F5H4S9|A0A8F5…	tr|U3G064|U3G064_ARBUN ATP synthase subunit beta, chloroplastic OS=Arbutus unedo OX=84005 GN=atpB PE=3 SV=1;tr|Q9M4Q3|Q9M4Q3_ARBUN ATP synthase subunit beta (Fragment) OS=Arbutus unedo OX=84005 GN=atpB PE=3 SV=1;tr|A0A8F5CCN1|A0A8F5CCN1_9ERIC ATP synthase	25.2836	25.8349	25.3665	53.931	262.15
tr|A0A6A4LFI6|A0A6A4LFI6_9ERIC;tr|A0A834H1K7|A0A834H1K7_RHOSS	tr|A0A6A4LFI6|A0A6A4LFI6_9ERIC Phosphoenolpyruvate carboxylase (Fragment) OS=Rhododendron williamsianum OX=262921 GN=C3L33_11733 PE=3 SV=1;tr|A0A834H1K7|A0A834H1K7_RHOSS Phosphoenolpyruvate carboxylase OS=Rhododendron simsii OX=118357 GN=RHSIM_Rhsim04G0026	27.1672	27.6375	27.9477	109.92	254.55
tr|A0A6A4KXU7|A0A6A4KXU7_9ERIC	tr|A0A6A4KXU7|A0A6A4KXU7_9ERIC Sucrose synthase (Fragment) OS=Rhododendron williamsianum OX=262921 GN=C3L33_19213 PE=3 SV=1	28.1808	28.3007	29.1757	90.277	245.07
tr|A0A834LFI5|A0A834LFI5_RHOSS;tr|A0A6A4LNY6|A0A6A4LNY6_9ERIC	tr|A0A834LFI5|A0A834LFI5_RHOSS Uncharacterized protein OS=Rhododendron simsii OX=118357 GN=RHSIM_Rhsim07G0088700 PE=3 SV=1;tr|A0A6A4LNY6|A0A6A4LNY6_9ERIC Uncharacterized protein (Fragment) OS=Rhododendron williamsianum OX=262921 GN=C3L33_08538 PE=3 SV=1	NaN	26.8013	26.4643	103.06	240.94
tr|A0A834L8E9|A0A834L8E9_RHOSS;tr|A0A834G503|A0A834G503_RHOSS;tr|A0A834L8K7|A0A834L8K7_RHOSS;tr|A0A834G5X4|A0A834G5X4_RHOSS;tr|A0A834G555|A0A834G555_RHOSS;tr|A0A6A4LAH3|A0A6A4LAH3_9ERIC	tr|A0A834L8E9|A0A834L8E9_RHOSS Uncharacterized protein OS=Rhododendron simsii OX=118357 GN=RHSIM_Rhsim12G0197900 PE=4 SV=1;tr|A0A834G503|A0A834G503_RHOSS OVATE domain-containing protein OS=Rhododendron simsii OX=118357 GN=RHSIM_Rhsim12G0198100 PE=4 SV=1;tr	27.4252	26.7173	27.0315	93.614	238.68
tr|A0A6A4M5S9|A0A6A4M5S9_9ERIC;tr|A0A6A4M0Q2|A0A6A4M0Q2_9ERIC	tr|A0A6A4M5S9|A0A6A4M5S9_9ERIC Phosphopyruvate hydratase (Fragment) OS=Rhododendron williamsianum OX=262921 GN=C3L33_02557 PE=3 SV=1	28.6107	27.6364	28.2617	45.467	237.86
tr|A0A834GB46|A0A834GB46_RHOSS;tr|A0A6A4L043|A0A6A4L043_9ERIC;tr|A0A834GI74|A0A834GI74_RHOSS;tr|A0A834LA04|A0A834LA04_RHOSS	tr|A0A834GB46|A0A834GB46_RHOSS Uncharacterized protein OS=Rhododendron simsii OX=118357 GN=RHSIM_Rhsim10G0014200 PE=3 SV=1;tr|A0A6A4L043|A0A6A4L043_9ERIC Uncharacterized protein (Fragment) OS=Rhododendron williamsianum OX=262921 GN=C3L33_19046 PE=3 SV=1;tr	25.8946	25.9458	24.8468	85.44	228.93
tr|A0A6A4KRH6|A0A6A4KRH6_9ERIC;tr|A0A834H687|A0A834H687_RHOSS;tr|A0A834G8X3|A0A834G8X3_RHOSS;tr|A0A834G878|A0A834G878_RHOSS;tr|A0A6A4KK79|A0A6A4KK79_9ERIC	tr|A0A6A4KRH6|A0A6A4KRH6_9ERIC Uncharacterized protein (Fragment) OS=Rhododendron williamsianum OX=262921 GN=C3L33_19787 PE=3 SV=1;tr|A0A834H687|A0A834H687_RHOSS Uncharacterized protein OS=Rhododendron simsii OX=118357 GN=RHSIM_Rhsim05G0113400 PE=3 SV=1	NaN	NaN	25.25	61.575	220.28
tr|A0A834GLA1|A0A834GLA1_RHOSS	tr|A0A834GLA1|A0A834GLA1_RHOSS Ribonuclease OS=Rhododendron simsii OX=118357 GN=RHSIM_Rhsim08G0199800 PE=4 SV=1	25.5004	26.3353	26.4817	109.99	219.65
tr|A0A834HIW7|A0A834HIW7_RHOSS;tr|A0A6A4M3J8|A0A6A4M3J8_9ERIC	tr|A0A834HIW7|A0A834HIW7_RHOSS Aha1_N domain-containing protein OS=Rhododendron simsii OX=118357 GN=RHSIM_Rhsim03G0004900 PE=3 SV=1;tr|A0A6A4M3J8|A0A6A4M3J8_9ERIC Aha1_N domain-containing protein (Fragment) OS=Rhododendron williamsianum OX=262921 GN=C3L33_	25.1702	25.4083	25.6998	39.256	214.85
tr|A0A834H0N4|A0A834H0N4_RHOSS;tr|A0A6A4LWK5|A0A6A4LWK5_9ERIC;tr|A0A6A4M870|A0A6A4M870_9ERIC;tr|A0A834HPX5|A0A834HPX5_RHOSS	tr|A0A834H0N4|A0A834H0N4_RHOSS Sec16_C domain-containing protein OS=Rhododendron simsii OX=118357 GN=RHSIM_Rhsim07G0059400 PE=3 SV=1;tr|A0A6A4LWK5|A0A6A4LWK5_9ERIC Sec16_C domain-containing protein (Fragment) OS=Rhododendron williamsianum OX=262921 GN=C3L3	NaN	25.9069	25.9668	126.3	214.61
tr|A0A834GQ61|A0A834GQ61_RHOSS;tr|A0A6A4LQ76|A0A6A4LQ76_9ERIC;tr|A0A834HBA4|A0A834HBA4_RHOSS;tr|A0A6A4LKQ4|A0A6A4LKQ4_9ERIC;tr|A0A834LMC4|A0A834LMC4_RHOSS	tr|A0A834GQ61|A0A834GQ61_RHOSS Uncharacterized protein OS=Rhododendron simsii OX=118357 GN=RHSIM_Rhsim07G0252800 PE=3 SV=1;tr|A0A6A4LQ76|A0A6A4LQ76_9ERIC Uncharacterized protein (Fragment) OS=Rhododendron williamsianum OX=262921 GN=C3L33_09434 PE=3 SV=1	26.2479	27.8391	28.8502	59.791	209.43
tr|A0A834L399|A0A834L399_RHOSS;tr|A0A6A4LVK2|A0A6A4LVK2_9ERIC	tr|A0A834L399|A0A834L399_RHOSS Endoglucanase OS=Rhododendron simsii OX=118357 GN=RHSIM_Rhsim13G0008700 PE=3 SV=1;tr|A0A6A4LVK2|A0A6A4LVK2_9ERIC Pectinesterase (Fragment) OS=Rhododendron williamsianum OX=262921 GN=C3L33_07636 PE=3 SV=1	26.572	27.6916	28.9226	221.41	209.17
tr|A0A834H752|A0A834H752_RHOSS	tr|A0A834H752|A0A834H752_RHOSS Malic enzyme OS=Rhododendron simsii OX=118357 GN=RHSIM_Rhsim03G0237400 PE=3 SV=1	28.305	27.2997	27.6723	66.37	205.47
tr|A0A834G7N9|A0A834G7N9_RHOSS;tr|A0A6A4KWF1|A0A6A4KWF1_9ERIC;tr|A0A6A4KSV2|A0A6A4KSV2_9ERIC	tr|A0A834G7N9|A0A834G7N9_RHOSS S-methyl-5-thioribose kinase OS=Rhododendron simsii OX=118357 GN=RHSIM_Rhsim11G0159300 PE=3 SV=1;tr|A0A6A4KWF1|A0A6A4KWF1_9ERIC APH domain-containing protein (Fragment) OS=Rhododendron williamsianum OX=262921 GN=C3L33_20953 P	27.0716	26.5546	26.5714	47.425	196.99
tr|A0A834GNJ2|A0A834GNJ2_RHOSS;tr|A0A6A4LM78|A0A6A4LM78_9ERIC;tr|A0A6A4KCQ8|A0A6A4KCQ8_9ERIC	tr|A0A834GNJ2|A0A834GNJ2_RHOSS Malic enzyme OS=Rhododendron simsii OX=118357 GN=RHSIM_Rhsim07G0145700 PE=3 SV=1;tr|A0A6A4LM78|A0A6A4LM78_9ERIC Malic enzyme (Fragment) OS=Rhododendron williamsianum OX=262921 GN=C3L33_08946 PE=3 SV=1	24.3008	23.935	23.6697	78.024	194.18
tr|A0A834FXD5|A0A834FXD5_RHOSS;tr|A0A6A4LMW6|A0A6A4LMW6_9ERIC	tr|A0A834FXD5|A0A834FXD5_RHOSS Alanine--glyoxylate transaminase OS=Rhododendron simsii OX=118357 GN=RHSIM_Rhsim13G0215900 PE=3 SV=1;tr|A0A6A4LMW6|A0A6A4LMW6_9ERIC Aminotran_5 domain-containing protein (Fragment) OS=Rhododendron williamsianum OX=262921 GN=C	27.0934	26.4401	27.399	45.891	192.37
tr|A0A834GG08|A0A834GG08_RHOSS;tr|A0A6A4L8L6|A0A6A4L8L6_9ERIC	tr|A0A834GG08|A0A834GG08_RHOSS Ubiquitinyl hydrolase 1 OS=Rhododendron simsii OX=118357 GN=RHSIM_Rhsim09G0140000 PE=3 SV=1;tr|A0A6A4L8L6|A0A6A4L8L6_9ERIC Ubiquitinyl hydrolase 1 (Fragment) OS=Rhododendron williamsianum OX=262921 GN=C3L33_16853 PE=3 SV=1	NaN	25.0095	NaN	166.8	181.72
tr|A0A834G059|A0A834G059_RHOSS;tr|A0A6A4M0T2|A0A6A4M0T2_9ERIC	tr|A0A834G059|A0A834G059_RHOSS Lipoxygenase OS=Rhododendron simsii OX=118357 GN=RHSIM_Rhsim13G0225600 PE=3 SV=1	28.8928	27.9557	27.8415	101.61	181.44
tr|A0A6A4LWC6|A0A6A4LWC6_9ERIC;tr|A0A834GQW0|A0A834GQW0_RHOSS;tr|A0A834LJI3|A0A834LJI3_RHOSS	tr|A0A6A4LWC6|A0A6A4LWC6_9ERIC AAA domain-containing protein (Fragment) OS=Rhododendron williamsianum OX=262921 GN=C3L33_09483 PE=3 SV=1;tr|A0A834GQW0|A0A834GQW0_RHOSS AAA domain-containing protein OS=Rhododendron simsii OX=118357 GN=RHSIM_Rhsim07G0243000	26.948	27.4012	27.3476	44.702	179.55
tr|A0A6A4KMR0|A0A6A4KMR0_9ERIC;tr|A0A834LQF6|A0A834LQF6_RHOSS	tr|A0A6A4KMR0|A0A6A4KMR0_9ERIC Uncharacterized protein (Fragment) OS=Rhododendron williamsianum OX=262921 GN=C3L33_22717 PE=3 SV=1;tr|A0A834LQF6|A0A834LQF6_RHOSS Uncharacterized protein OS=Rhododendron simsii OX=118357 GN=RHSIM_Rhsim04G0127300 PE=3 SV=1	NaN	NaN	24.5051	50.295	179.49
tr|A0A6A4MAP8|A0A6A4MAP8_9ERIC;tr|A0A834M2I7|A0A834M2I7_RHOSS	tr|A0A6A4MAP8|A0A6A4MAP8_9ERIC S-(hydroxymethyl)glutathione dehydrogenase (Fragment) OS=Rhododendron williamsianum OX=262921 GN=C3L33_04286 PE=3 SV=1;tr|A0A834M2I7|A0A834M2I7_RHOSS S-(hydroxymethyl)glutathione dehydrogenase OS=Rhododendron simsii OX=118357	27.773	28.5726	27.6196	41.122	176.86
tr|A0A834G4T4|A0A834G4T4_RHOSS;tr|A0A6A4LBA2|A0A6A4LBA2_9ERIC	tr|A0A834G4T4|A0A834G4T4_RHOSS Uncharacterized protein OS=Rhododendron simsii OX=118357 GN=RHSIM_Rhsim12G0006200 PE=3 SV=1;tr|A0A6A4LBA2|A0A6A4LBA2_9ERIC Uncharacterized protein (Fragment) OS=Rhododendron williamsianum OX=262921 GN=C3L33_13201 PE=3 SV=1	23.9257	24.6955	25.6081	68.129	176.68
tr|A0A834GRY6|A0A834GRY6_RHOSS;tr|A0A834LTB3|A0A834LTB3_RHOSS;tr|A0A6A4LGI0|A0A6A4LGI0_9ERIC;tr|A0A6A4M2V8|A0A6A4M2V8_9ERIC;tr|A0A6A4LJV0|A0A6A4LJV0_9ERIC	tr|A0A834GRY6|A0A834GRY6_RHOSS HATPase_c domain-containing protein OS=Rhododendron simsii OX=118357 GN=RHSIM_Rhsim06G0232600 PE=3 SV=1;tr|A0A834LTB3|A0A834LTB3_RHOSS HATPase_c domain-containing protein OS=Rhododendron simsii OX=118357 GN=RHSIM_Rhsim03G0191	26.2669	27.5873	27.6048	80.318	176.32
tr|A0A834GTK2|A0A834GTK2_RHOSS;tr|A0A834GV77|A0A834GV77_RHOSS;tr|A0A6A4L8F6|A0A6A4L8F6_9ERIC;tr|A0A1J0A0N6|A0A1J0A0N6_RHOML;tr|A0A6A4LLS6|A0A6A4LLS6_9ERIC	tr|A0A834GTK2|A0A834GTK2_RHOSS Glyceraldehyde-3-phosphate dehydrogenase OS=Rhododendron simsii OX=118357 GN=RHSIM_Rhsim07G0257000 PE=3 SV=1;tr|A0A834GV77|A0A834GV77_RHOSS Glyceraldehyde-3-phosphate dehydrogenase OS=Rhododendron simsii OX=118357 GN=RHSIM_Rh	25.0799	24.2117	22.8087	45.666	171.99
tr|A0A834G0K1|A0A834G0K1_RHOSS;tr|A0A6A4L7J4|A0A6A4L7J4_9ERIC;tr|A0A834LTV7|A0A834LTV7_RHOSS	tr|A0A834G0K1|A0A834G0K1_RHOSS Acetylornithine transaminase OS=Rhododendron simsii OX=118357 GN=RHSIM_Rhsim12G0188700 PE=3 SV=1;tr|A0A6A4L7J4|A0A6A4L7J4_9ERIC Acetylornithine transaminase (Fragment) OS=Rhododendron williamsianum OX=262921 GN=C3L33_14541 PE	NaN	24.2621	NaN	48.429	165.13
tr|A0A6A4KF34|A0A6A4KF34_9ERIC	tr|A0A6A4KF34|A0A6A4KF34_9ERIC Pectin acetylesterase (Fragment) OS=Rhododendron williamsianum OX=262921 GN=C3L33_21369 PE=3 SV=1	22.423	NaN	22.0087	27.399	163.54
tr|A0A6A4KPL6|A0A6A4KPL6_9ERIC	tr|A0A6A4KPL6|A0A6A4KPL6_9ERIC Phosphoglycerate kinase (Fragment) OS=Rhododendron williamsianum OX=262921 GN=C3L33_22991 PE=3 SV=1	25.2251	24.88	25.2126	76.481	163.51
tr|A0A6A4KRB6|A0A6A4KRB6_9ERIC;tr|A0A834GYN0|A0A834GYN0_RHOSS	tr|A0A6A4KRB6|A0A6A4KRB6_9ERIC Uncharacterized protein (Fragment) OS=Rhododendron williamsianum OX=262921 GN=C3L33_19823 PE=4 SV=1;tr|A0A834GYN0|A0A834GYN0_RHOSS Uncharacterized protein OS=Rhododendron simsii OX=118357 GN=RHSIM_Rhsim05G0069700 PE=4 SV=1	26.1833	27.958	27.2749	144.49	161.86
tr|A0A6A4MFR9|A0A6A4MFR9_9ERIC;tr|A0A834LH06|A0A834LH06_RHOSS;tr|A0A6A4KWV1|A0A6A4KWV1_9ERIC;tr|A0A834LA70|A0A834LA70_RHOSS	tr|A0A6A4MFR9|A0A6A4MFR9_9ERIC UTP--glucose-1-phosphate uridylyltransferase (Fragment) OS=Rhododendron williamsianum OX=262921 GN=C3L33_01816 PE=3 SV=1;tr|A0A834LH06|A0A834LH06_RHOSS UTP--glucose-1-phosphate uridylyltransferase OS=Rhododendron simsii OX=11	26.3138	25.5273	25.2757	64.168	161.31
tr|A0A6A4L3X7|A0A6A4L3X7_9ERIC	tr|A0A6A4L3X7|A0A6A4L3X7_9ERIC Fructose-bisphosphate aldolase (Fragment) OS=Rhododendron williamsianum OX=262921 GN=C3L33_13780 PE=3 SV=1	NaN	24.7807	24.8851	37.859	160.87
tr|A0A6A4MCT2|A0A6A4MCT2_9ERIC;tr|A0A6A4M6I6|A0A6A4M6I6_9ERIC;tr|A0A6A4KHV6|A0A6A4KHV6_9ERIC	tr|A0A6A4MCT2|A0A6A4MCT2_9ERIC Succinate dehydrogenase (quinone) (Fragment) OS=Rhododendron williamsianum OX=262921 GN=C3L33_01129 PE=3 SV=1	25.9975	26.9781	26.8854	72.2	160.6
tr|A0A834G575|A0A834G575_RHOSS;tr|A0A6A4KV52|A0A6A4KV52_9ERIC	tr|A0A834G575|A0A834G575_RHOSS S-adenosylmethionine synthase OS=Rhododendron simsii OX=118357 GN=RHSIM_Rhsim11G0100300 PE=3 SV=1	27.4706	27.9568	27.8405	43.439	159.96
tr|A0A6A4LGF2|A0A6A4LGF2_9ERIC;tr|A0A834L741|A0A834L741_RHOSS	tr|A0A6A4LGF2|A0A6A4LGF2_9ERIC Uncharacterized protein (Fragment) OS=Rhododendron williamsianum OX=262921 GN=C3L33_13738 PE=3 SV=1;tr|A0A834L741|A0A834L741_RHOSS Uncharacterized protein OS=Rhododendron simsii OX=118357 GN=RHSIM_Rhsim12G0083200 PE=3 SV=1	26.2187	26.7247	27.1981	102.61	159.25
tr|A0A6A4M7F2|A0A6A4M7F2_9ERIC;tr|A0A834GHC0|A0A834GHC0_RHOSS	tr|A0A6A4M7F2|A0A6A4M7F2_9ERIC Formate dehydrogenase (Fragment) OS=Rhododendron williamsianum OX=262921 GN=C3L33_01595 PE=3 SV=1;tr|A0A834GHC0|A0A834GHC0_RHOSS Formate dehydrogenase, mitochondrial OS=Rhododendron simsii OX=118357 GN=RHSIM_Rhsim08G0055000 P	26.9597	27.1617	26.9278	43.058	155.5
tr|A0A834LBG0|A0A834LBG0_RHOSS;tr|A0A6A4L5C0|A0A6A4L5C0_9ERIC;tr|A0A834GA42|A0A834GA42_RHOSS;tr|A0A6A4KRD5|A0A6A4KRD5_9ERIC	tr|A0A834LBG0|A0A834LBG0_RHOSS Uncharacterized protein OS=Rhododendron simsii OX=118357 GN=RHSIM_Rhsim10G0186400 PE=3 SV=1;tr|A0A6A4L5C0|A0A6A4L5C0_9ERIC Uncharacterized protein (Fragment) OS=Rhododendron williamsianum OX=262921 GN=C3L33_17935 PE=3 SV=1;tr	26.8582	26.7669	26.7321	81.354	154.74
tr|A0A834FZR7|A0A834FZR7_RHOSS;tr|A0A6A4LZ25|A0A6A4LZ25_9ERIC;tr|A0A834L217|A0A834L217_RHOSS	tr|A0A834FZR7|A0A834FZR7_RHOSS Aminomethyltransferase OS=Rhododendron simsii OX=118357 GN=RHSIM_Rhsim13G0152700 PE=3 SV=1;tr|A0A6A4LZ25|A0A6A4LZ25_9ERIC Uncharacterized protein (Fragment) OS=Rhododendron williamsianum OX=262921 GN=C3L33_06430 PE=3 SV=1;tr|	27.145	27.403	26.4564	44.458	154.49
tr|A0A834GK15|A0A834GK15_RHOSS;tr|A0A834GN50|A0A834GN50_RHOSS;tr|A0A6A4MKJ0|A0A6A4MKJ0_9ERIC;tr|A0A834L8L5|A0A834L8L5_RHOSS;tr|A0A6A4L7V0|A0A6A4L7V0_9ERIC;tr|B6E2B5|B6E2B5_VACCO	tr|A0A834GK15|A0A834GK15_RHOSS Epimerase domain-containing protein OS=Rhododendron simsii OX=118357 GN=RHSIM_Rhsim08G0207100 PE=4 SV=1;tr|A0A834GN50|A0A834GN50_RHOSS Epimerase domain-containing protein OS=Rhododendron simsii OX=118357 GN=RHSIM_Rhsim08G0206	NaN	NaN	25.0492	29.713	153.64
tr|A0A834HG31|A0A834HG31_RHOSS;tr|A0A6A4M105|A0A6A4M105_9ERIC;tr|A0A834LJJ4|A0A834LJJ4_RHOSS	tr|A0A834HG31|A0A834HG31_RHOSS AAA domain-containing protein OS=Rhododendron simsii OX=118357 GN=RHSIM_Rhsim02G0193400 PE=3 SV=1;tr|A0A6A4M105|A0A6A4M105_9ERIC AAA domain-containing protein (Fragment) OS=Rhododendron williamsianum OX=262921 GN=C3L33_07818	26.1218	25.4453	26.4357	51.782	151.09
tr|A0A6A4LV24|A0A6A4LV24_9ERIC;tr|A0A6H0F007|A0A6H0F007_9ERIC;tr|A0A834G0V8|A0A834G0V8_RHOSS;tr|A0A6H0EXT9|A0A6H0EXT9_9ERIC;tr|A0A834GZG3|A0A834GZG3_RHOSS;tr|A0A6H0EZL9|A0A6H0EZL9_9ERIC;tr|A0A6H0EZ87|A0A6H0EZ87_9ERIC;tr|A0A6H0F0G9|A0A6H0F0G9_9ERIC;tr|A0A6H0EZ99|A0A6H0EZ99_9ERIC;tr|G3BG27|G3BG27_9ERIC;tr|A0A6A4KXV0|A0A6A4KXV0_9ERIC;tr|A0A6H0EXU2|A0A6H0EXU2_9ERIC;tr|K4EK83|K4EK83_9ERIC;tr|K4EJU0|K4…	tr|A0A6A4LV24|A0A6A4LV24_9ERIC ATPase_AAA_core domain-containing protein (Fragment) OS=Rhododendron williamsianum OX=262921 GN=C3L33_07022 PE=3 SV=1;tr|A0A6H0F007|A0A6H0F007_9ERIC Chloroplast ribulose bisphosphate carboxylase/oxygenase activase 2 transcrip	27.2119	25.8919	25.7438	51.542	150.92
tr|A0A834L7X1|A0A834L7X1_RHOSS;tr|A0A6A4LTZ2|A0A6A4LTZ2_9ERIC	tr|A0A834L7X1|A0A834L7X1_RHOSS FAD-binding PCMH-type domain-containing protein OS=Rhododendron simsii OX=118357 GN=RHSIM_Rhsim13G0123200 PE=3 SV=1	26.5675	26.9429	27.157	59.316	144.8
tr|A0A6A4LP47|A0A6A4LP47_9ERIC;tr|A0A834GZZ4|A0A834GZZ4_RHOSS	tr|A0A6A4LP47|A0A6A4LP47_9ERIC Uncharacterized protein (Fragment) OS=Rhododendron williamsianum OX=262921 GN=C3L33_11753 PE=3 SV=1;tr|A0A834GZZ4|A0A834GZZ4_RHOSS Uncharacterized protein OS=Rhododendron simsii OX=118357 GN=RHSIM_Rhsim04G0029500 PE=3 SV=1	25.8455	25.0053	24.7112	44.173	144.46
tr|A0A834HAL3|A0A834HAL3_RHOSS;tr|A0A6A4MCJ4|A0A6A4MCJ4_9ERIC;tr|A0A6A4KHK8|A0A6A4KHK8_9ERIC;tr|A0A6A4KQF1|A0A6A4KQF1_9ERIC;tr|B0FGG5|B0FGG5_VACCO;tr|A0A834L3X7|A0A834L3X7_RHOSS	tr|A0A834HAL3|A0A834HAL3_RHOSS Pyr_redox_2 domain-containing protein OS=Rhododendron simsii OX=118357 GN=RHSIM_Rhsim03G0078300 PE=4 SV=1;tr|A0A6A4MCJ4|A0A6A4MCJ4_9ERIC Pyr_redox_2 domain-containing protein (Fragment) OS=Rhododendron williamsianum OX=262921	NaN	NaN	27.6259	50.451	141.97
tr|A0A834GU39|A0A834GU39_RHOSS;tr|A0A6A4KVZ3|A0A6A4KVZ3_9ERIC;tr|A0A834HDL0|A0A834HDL0_RHOSS	tr|A0A834GU39|A0A834GU39_RHOSS Phosphoglycerate kinase OS=Rhododendron simsii OX=118357 GN=RHSIM_Rhsim05G0232900 PE=3 SV=1;tr|A0A6A4KVZ3|A0A6A4KVZ3_9ERIC Phosphoglycerate kinase (Fragment) OS=Rhododendron williamsianum OX=262921 GN=C3L33_20583 PE=3 SV=1	28.5197	NaN	28.0655	42.447	141.95
tr|A0A834GT54|A0A834GT54_RHOSS;tr|A0A6A4KR64|A0A6A4KR64_9ERIC	tr|A0A834GT54|A0A834GT54_RHOSS Aspartate aminotransferase OS=Rhododendron simsii OX=118357 GN=RHSIM_Rhsim07G0162300 PE=3 SV=1;tr|A0A6A4KR64|A0A6A4KR64_9ERIC Aspartate aminotransferase (Fragment) OS=Rhododendron williamsianum OX=262921 GN=C3L33_22701 PE=3 S	27.3509	27.3837	27.326	57.39	141.27
tr|A0A834GN01|A0A834GN01_RHOSS;tr|A0A6A4M1C4|A0A6A4M1C4_9ERIC;tr|A0A6A4K6V9|A0A6A4K6V9_9ERIC	tr|A0A834GN01|A0A834GN01_RHOSS Uncharacterized protein OS=Rhododendron simsii OX=118357 GN=RHSIM_Rhsim08G0129000 PE=3 SV=1;tr|A0A6A4M1C4|A0A6A4M1C4_9ERIC Uncharacterized protein (Fragment) OS=Rhododendron williamsianum OX=262921 GN=C3L33_01014 PE=3 SV=1	25.1599	25.3709	NaN	34.911	140.52
tr|A0A6A4L2U8|A0A6A4L2U8_9ERIC;tr|A0A834HCM7|A0A834HCM7_RHOSS	tr|A0A6A4L2U8|A0A6A4L2U8_9ERIC Uncharacterized protein (Fragment) OS=Rhododendron williamsianum OX=262921 GN=C3L33_15673 PE=4 SV=1;tr|A0A834HCM7|A0A834HCM7_RHOSS Obg-like ATPase 1 OS=Rhododendron simsii OX=118357 GN=RHSIM_Rhsim02G0162600 PE=3 SV=1	26.0934	25.9154	26.5478	38.907	140.28
tr|A0A834LVL9|A0A834LVL9_RHOSS;tr|A0A834LFD5|A0A834LFD5_RHOSS;tr|A0A6A4KRP9|A0A6A4KRP9_9ERIC;tr|A0A6A4L6P5|A0A6A4L6P5_9ERIC;tr|A0A834G6W7|A0A834G6W7_RHOSS;tr|A0A6A4LPA6|A0A6A4LPA6_9ERIC;tr|A0A6A4M299|A0A6A4M299_9ERIC;tr|A0A834H0Q4|A0A834H0Q4_RHOSS;tr|A0A6A4KQ05|A0A6A4KQ05_9ERIC;tr|A0A6A4KUN6|A0A6A4KUN6_9ERIC	tr|A0A834LVL9|A0A834LVL9_RHOSS Uncharacterized protein OS=Rhododendron simsii OX=118357 GN=RHSIM_Rhsim01G0227200 PE=3 SV=1;tr|A0A834LFD5|A0A834LFD5_RHOSS Uncharacterized protein OS=Rhododendron simsii OX=118357 GN=RHSIM_Rhsim03G0130900 PE=3 SV=1;tr|A0A6A4K	26.9687	27.363	27.6413	41.656	139.99
tr|A0A834GSE0|A0A834GSE0_RHOSS;tr|A0A834LSV3|A0A834LSV3_RHOSS;tr|A0A834H3W3|A0A834H3W3_RHOSS;tr|A0A834G3R5|A0A834G3R5_RHOSS;tr|A0A834LMG5|A0A834LMG5_RHOSS;tr|A0A834FSZ1|A0A834FSZ1_RHOSS;tr|A0A834LIG9|A0A834LIG9_RHOSS;tr|A0A834LR59|A0A834LR59_RHOSS;tr|A0A834H2B7|A0A834H2B7_RHOSS;tr|A0A834G007|A0A834G007_RHOSS	tr|A0A834GSE0|A0A834GSE0_RHOSS Uncharacterized protein OS=Rhododendron simsii OX=118357 GN=RHSIM_Rhsim06G0241500 PE=4 SV=1;tr|A0A834LSV3|A0A834LSV3_RHOSS Ubiquitin-like domain-containing protein OS=Rhododendron simsii OX=118357 GN=RHSIM_Rhsim04G0245900 PE=	27.0449	28.3319	28.6688	17.122	136.34
tr|A0A6A4M6I9|A0A6A4M6I9_9ERIC;tr|A0A834HJW7|A0A834HJW7_RHOSS	tr|A0A6A4M6I9|A0A6A4M6I9_9ERIC Uncharacterized protein (Fragment) OS=Rhododendron williamsianum OX=262921 GN=C3L33_04248 PE=3 SV=1;tr|A0A834HJW7|A0A834HJW7_RHOSS Uncharacterized protein OS=Rhododendron simsii OX=118357 GN=RHSIM_Rhsim01G0263200 PE=3 SV=1	29.3089	29.3963	29.7325	55.392	134.25
tr|A0A834LH50|A0A834LH50_RHOSS;tr|A0A6A4KYV8|A0A6A4KYV8_9ERIC;tr|A0A834LF28|A0A834LF28_RHOSS;tr|A0A834LED3|A0A834LED3_RHOSS;tr|A0A834GDT5|A0A834GDT5_RHOSS;tr|A0A6A4LAD3|A0A6A4LAD3_9ERIC;tr|A0A6A4L2E8|A0A6A4L2E8_9ERIC;tr|A0A6A4K6H1|A0A6A4K6H1_9ERIC;tr|A0A834LE34|A0A834LE34_RHOSS;tr|A0A6A4LE65|A0A6A4LE65_9ERIC;tr|A0A834HAE0|A0A834HAE0_RHOSS;tr|A0A6A4KPN5|A0A6A4KPN5_9ERIC;tr|A0A6A4L8R3|A0A6A4L8R3_9E…	tr|A0A834LH50|A0A834LH50_RHOSS Acyl-[acyl-carrier-protein] desaturase OS=Rhododendron simsii OX=118357 GN=RHSIM_Rhsim09G0009000 PE=3 SV=1;tr|A0A6A4KYV8|A0A6A4KYV8_9ERIC Acyl-[acyl-carrier-protein] desaturase (Fragment) OS=Rhododendron williamsianum OX=2629	22.6964	24.7535	24.1304	45.594	132.03
tr|A0A6A4LBB6|A0A6A4LBB6_9ERIC	tr|A0A6A4LBB6|A0A6A4LBB6_9ERIC Uncharacterized protein (Fragment) OS=Rhododendron williamsianum OX=262921 GN=C3L33_16054 PE=4 SV=1	25.3482	25.9149	26.1372	97.754	128.24
tr|A0A834HFN0|A0A834HFN0_RHOSS;tr|A0A6A4LC41|A0A6A4LC41_9ERIC	tr|A0A834HFN0|A0A834HFN0_RHOSS Serine hydroxymethyltransferase OS=Rhododendron simsii OX=118357 GN=RHSIM_Rhsim02G0062000 PE=3 SV=1;tr|A0A6A4LC41|A0A6A4LC41_9ERIC Serine hydroxymethyltransferase (Fragment) OS=Rhododendron williamsianum OX=262921 GN=C3L33_15	24.6882	25.6477	25.6374	52.015	128.08
tr|A0A6A4LWC5|A0A6A4LWC5_9ERIC;tr|I1U4L1|I1U4L1_9ERIC;tr|A0A834L8N7|A0A834L8N7_RHOSS;tr|A0A6A4L023|A0A6A4L023_9ERIC	tr|A0A6A4LWC5|A0A6A4LWC5_9ERIC Uncharacterized protein (Fragment) OS=Rhododendron williamsianum OX=262921 GN=C3L33_05743 PE=3 SV=1	25.7854	24.7061	23.5937	43.658	125.22
tr|A0A834G3A7|A0A834G3A7_RHOSS;tr|A0A6A4LFD6|A0A6A4LFD6_9ERIC;tr|A0A834H0E9|A0A834H0E9_RHOSS;tr|A0A6A4KXH4|A0A6A4KXH4_9ERIC;tr|A0A834LCG4|A0A834LCG4_RHOSS	tr|A0A834G3A7|A0A834G3A7_RHOSS Phosphoglycerate mutase (2,3-diphosphoglycerate-independent) OS=Rhododendron simsii OX=118357 GN=RHSIM_Rhsim12G0013400 PE=3 SV=1;tr|A0A6A4LFD6|A0A6A4LFD6_9ERIC Phosphoglycerate mutase (2,3-diphosphoglycerate-independent) (Fra	25.7774	25.3458	26.4135	61.193	124.81
tr|A0A834HEW6|A0A834HEW6_RHOSS	tr|A0A834HEW6|A0A834HEW6_RHOSS Methenyltetrahydrofolate cyclohydrolase OS=Rhododendron simsii OX=118357 GN=RHSIM_Rhsim02G0054100 PE=3 SV=1	24.4514	23.5442	23.9389	41.638	122.83
tr|A0A6A4KNN8|A0A6A4KNN8_9ERIC	tr|A0A6A4KNN8|A0A6A4KNN8_9ERIC Carboxypeptidase (Fragment) OS=Rhododendron williamsianum OX=262921 GN=C3L33_20901 PE=3 SV=1	30.2164	30.6975	30.3709	65.949	122.35
tr|A0A834LGT6|A0A834LGT6_RHOSS;tr|A0A6A4L3S3|A0A6A4L3S3_9ERIC;tr|A0A834HEP1|A0A834HEP1_RHOSS;tr|A0A834LEY6|A0A834LEY6_RHOSS	tr|A0A834LGT6|A0A834LGT6_RHOSS Phosphoglucomutase (alpha-D-glucose-1,6-bisphosphate-dependent) OS=Rhododendron simsii OX=118357 GN=RHSIM_Rhsim09G0093200 PE=3 SV=1;tr|A0A6A4L3S3|A0A6A4L3S3_9ERIC Phosphoglucomutase (alpha-D-glucose-1,6-bisphosphate-dependent	25.9925	26.2515	26.9671	68.365	122.09
tr|A0A076NBT0|A0A076NBT0_VACCO	tr|A0A076NBT0|A0A076NBT0_VACCO O-methyltransferase OS=Vaccinium corymbosum OX=69266 PE=2 SV=1	NaN	25.6548	24.8541	40.33	120.19
tr|A0A6A4KS97|A0A6A4KS97_9ERIC;tr|A0A834LCS5|A0A834LCS5_RHOSS	tr|A0A6A4KS97|A0A6A4KS97_9ERIC Sucrose-phosphatase (Fragment) OS=Rhododendron williamsianum OX=262921 GN=C3L33_17623 PE=3 SV=1;tr|A0A834LCS5|A0A834LCS5_RHOSS Sucrose-phosphatase OS=Rhododendron simsii OX=118357 GN=RHSIM_Rhsim09G0022800 PE=3 SV=1	24.6021	25.347	24.1555	48.584	117.38
tr|A0A6A4L5U5|A0A6A4L5U5_9ERIC;tr|A0A834LFS1|A0A834LFS1_RHOSS	tr|A0A6A4L5U5|A0A6A4L5U5_9ERIC HATPase_c domain-containing protein (Fragment) OS=Rhododendron williamsianum OX=262921 GN=C3L33_16978 PE=3 SV=1;tr|A0A834LFS1|A0A834LFS1_RHOSS HATPase_c domain-containing protein OS=Rhododendron simsii OX=118357 GN=RHSIM_Rhsi	25.8099	26.2399	25.7047	85.798	117.38
tr|A0A6A4LMC4|A0A6A4LMC4_9ERIC;tr|A0A834H278|A0A834H278_RHOSS	tr|A0A6A4LMC4|A0A6A4LMC4_9ERIC Acylaminoacyl-peptidase (Fragment) OS=Rhododendron williamsianum OX=262921 GN=C3L33_12332 PE=3 SV=1;tr|A0A834H278|A0A834H278_RHOSS Acylaminoacyl-peptidase OS=Rhododendron simsii OX=118357 GN=RHSIM_Rhsim04G0195100 PE=3 SV=1	NaN	25.8586	NaN	87.717	117.37
tr|A0A6A4MAB1|A0A6A4MAB1_9ERIC;tr|A0A834LZF6|A0A834LZF6_RHOSS	tr|A0A6A4MAB1|A0A6A4MAB1_9ERIC Uncharacterized protein (Fragment) OS=Rhododendron williamsianum OX=262921 GN=C3L33_04644 PE=3 SV=1;tr|A0A834LZF6|A0A834LZF6_RHOSS Uncharacterized protein OS=Rhododendron simsii OX=118357 GN=RHSIM_Rhsim01G0213500 PE=3 SV=1	24.3067	23.9574	23.6403	62.037	115.95
tr|A0A6A4KYX0|A0A6A4KYX0_9ERIC;tr|A0A834FV85|A0A834FV85_RHOSS	tr|A0A6A4KYX0|A0A6A4KYX0_9ERIC Ribos_L4_asso_C domain-containing protein (Fragment) OS=Rhododendron williamsianum OX=262921 GN=C3L33_20208 PE=3 SV=1;tr|A0A834FV85|A0A834FV85_RHOSS Ribos_L4_asso_C domain-containing protein OS=Rhododendron simsii OX=118357 G	26.0674	NaN	25.2694	43.244	115.85
tr|A0A834L8V9|A0A834L8V9_RHOSS;tr|A0A6A4LJJ5|A0A6A4LJJ5_9ERIC	tr|A0A834L8V9|A0A834L8V9_RHOSS AP-1 complex subunit gamma OS=Rhododendron simsii OX=118357 GN=RHSIM_Rhsim12G0047900 PE=3 SV=1;tr|A0A6A4LJJ5|A0A6A4LJJ5_9ERIC GAE domain-containing protein (Fragment) OS=Rhododendron williamsianum OX=262921 GN=C3L33_13500 PE=	23.9035	24.4308	24.418	95.936	113.46
tr|A0A1J0A0R5|A0A1J0A0R5_RHOML;tr|A0A6A4KZE7|A0A6A4KZE7_9ERIC;tr|A0A6A4KUY8|A0A6A4KUY8_9ERIC;tr|A0A834G7T5|A0A834G7T5_RHOSS;tr|A0A834LNA7|A0A834LNA7_RHOSS	tr|A0A1J0A0R5|A0A1J0A0R5_RHOML RPL3 OS=Rhododendron molle OX=49168 GN=RPL3 PE=2 SV=1;tr|A0A6A4KZE7|A0A6A4KZE7_9ERIC Uncharacterized protein (Fragment) OS=Rhododendron williamsianum OX=262921 GN=C3L33_19794 PE=3 SV=1;tr|A0A6A4KUY8|A0A6A4KUY8_9ERIC Uncharact	25.5649	NaN	NaN	44.42	112.59
tr|A0A834FVF5|A0A834FVF5_RHOSS;tr|A0A834LDX1|A0A834LDX1_RHOSS	tr|A0A834FVF5|A0A834FVF5_RHOSS Glucose-6-phosphate 1-dehydrogenase OS=Rhododendron simsii OX=118357 GN=RHSIM_RhsimUnG0241400 PE=3 SV=1;tr|A0A834LDX1|A0A834LDX1_RHOSS Glucose-6-phosphate 1-dehydrogenase OS=Rhododendron simsii OX=118357 GN=RHSIM_Rhsim10G0011	25.7314	25.6563	25.0965	59.291	111.36
tr|A0A6A4LXB5|A0A6A4LXB5_9ERIC	tr|A0A6A4LXB5|A0A6A4LXB5_9ERIC Aminotran_1_2 domain-containing protein (Fragment) OS=Rhododendron williamsianum OX=262921 GN=C3L33_08098 PE=3 SV=1	26.0507	NaN	NaN	51.59	110.56
tr|A0A834HN43|A0A834HN43_RHOSS;tr|A0A6A4L9F4|A0A6A4L9F4_9ERIC;tr|A0A834G5A9|A0A834G5A9_RHOSS	tr|A0A834HN43|A0A834HN43_RHOSS Pyruvate kinase OS=Rhododendron simsii OX=118357 GN=RHSIM_Rhsim02G0031500 PE=3 SV=1;tr|A0A6A4L9F4|A0A6A4L9F4_9ERIC Pyruvate kinase (Fragment) OS=Rhododendron williamsianum OX=262921 GN=C3L33_15019 PE=3 SV=1	22.458	NaN	NaN	62.929	109.8
tr|A0A6A4KSJ7|A0A6A4KSJ7_9ERIC;tr|A0A834GI64|A0A834GI64_RHOSS;tr|A0A0G3FEC2|A0A0G3FEC2_VACCO;tr|A0A8F5V7A4|A0A8F5V7A4_9ERIC	tr|A0A6A4KSJ7|A0A6A4KSJ7_9ERIC Fe2OG dioxygenase domain-containing protein (Fragment) OS=Rhododendron williamsianum OX=262921 GN=C3L33_22031 PE=3 SV=1;tr|A0A834GI64|A0A834GI64_RHOSS Fe2OG dioxygenase domain-containing protein OS=Rhododendron simsii OX=1183	NaN	NaN	25.2302	42.587	109.73
tr|A0A834L814|A0A834L814_RHOSS;tr|A0A834G1P2|A0A834G1P2_RHOSS	tr|A0A834L814|A0A834L814_RHOSS Aldehyde dehydrogenase (NAD(+)) OS=Rhododendron simsii OX=118357 GN=RHSIM_Rhsim12G0211100 PE=3 SV=1;tr|A0A834G1P2|A0A834G1P2_RHOSS Aldehyde dehydrogenase (NAD(+)) OS=Rhododendron simsii OX=118357 GN=RHSIM_Rhsim12G0210700 PE=3	26.4993	25.6251	25.7046	54.735	109.46
tr|A0A6A4LSR1|A0A6A4LSR1_9ERIC	tr|A0A6A4LSR1|A0A6A4LSR1_9ERIC Uncharacterized protein (Fragment) OS=Rhododendron williamsianum OX=262921 GN=C3L33_04118 PE=4 SV=1	26.7867	27.5003	28.36	72.19	108.89
tr|A0A834G8Y2|A0A834G8Y2_RHOSS;tr|A0A6A4L2V2|A0A6A4L2V2_9ERIC;tr|A0A6A4L3I7|A0A6A4L3I7_9ERIC;tr|A0A834LEQ5|A0A834LEQ5_RHOSS;REV__tr|A0A834L8L2|A0A834L8L2_RHOSS;REV__tr|A0A6A4LGN9|A0A6A4LGN9_9ERIC	tr|A0A834G8Y2|A0A834G8Y2_RHOSS Glutamate decarboxylase OS=Rhododendron simsii OX=118357 GN=RHSIM_Rhsim10G0183700 PE=3 SV=1;tr|A0A6A4L2V2|A0A6A4L2V2_9ERIC Glutamate decarboxylase (Fragment) OS=Rhododendron williamsianum OX=262921 GN=C3L33_17969 PE=3 SV=1	26.3197	25.6216	25.8477	54.997	108.35
tr|A0A6A4L4C5|A0A6A4L4C5_9ERIC;tr|A0A834GJ52|A0A834GJ52_RHOSS	tr|A0A6A4L4C5|A0A6A4L4C5_9ERIC Phosphoenolpyruvate carboxylase (Fragment) OS=Rhododendron williamsianum OX=262921 GN=C3L33_17031 PE=3 SV=1;tr|A0A834GJ52|A0A834GJ52_RHOSS Phosphoenolpyruvate carboxylase OS=Rhododendron simsii OX=118357 GN=RHSIM_Rhsim09G0114	NaN	24.4378	24.5158	115.07	107.13
tr|A0A834GA44|A0A834GA44_RHOSS;tr|A0A6A4L2U1|A0A6A4L2U1_9ERIC;tr|A0A834GFV8|A0A834GFV8_RHOSS	tr|A0A834GA44|A0A834GA44_RHOSS ATP synthase subunit beta OS=Rhododendron simsii OX=118357 GN=RHSIM_Rhsim10G0077400 PE=3 SV=1;tr|A0A6A4L2U1|A0A6A4L2U1_9ERIC ATP synthase subunit beta (Fragment) OS=Rhododendron williamsianum OX=262921 GN=C3L33_18617 PE=3 SV=	23.8441	NaN	NaN	59.124	106.26
tr|A0A834GKP0|A0A834GKP0_RHOSS;tr|A0A6A4LHR3|A0A6A4LHR3_9ERIC;tr|A0A834HK56|A0A834HK56_RHOSS;tr|A0A6A4MAG6|A0A6A4MAG6_9ERIC	tr|A0A834GKP0|A0A834GKP0_RHOSS Protein kinase domain-containing protein OS=Rhododendron simsii OX=118357 GN=RHSIM_Rhsim07G0011800 PE=3 SV=1;tr|A0A6A4LHR3|A0A6A4LHR3_9ERIC Protein kinase domain-containing protein (Fragment) OS=Rhododendron williamsianum OX=	24.657	24.1657	24.1075	45.417	104.45
tr|A0A6A4LIB4|A0A6A4LIB4_9ERIC;tr|A0A834G2S7|A0A834G2S7_RHOSS	tr|A0A6A4LIB4|A0A6A4LIB4_9ERIC Uncharacterized protein (Fragment) OS=Rhododendron williamsianum OX=262921 GN=C3L33_13953 PE=3 SV=1	28.0061	28.4664	27.5399	43.025	103.23
tr|A0A834GQ77|A0A834GQ77_RHOSS;tr|A0A6A4LHI9|A0A6A4LHI9_9ERIC	tr|A0A834GQ77|A0A834GQ77_RHOSS Pyrophosphate--fructose 6-phosphate 1-phosphotransferase subunit alpha OS=Rhododendron simsii OX=118357 GN=PFP-ALPHA PE=3 SV=1	24.0206	24.0584	25.3814	66.582	100.95
tr|A0A834G500|A0A834G500_RHOSS;tr|A0A6A4L8T9|A0A6A4L8T9_9ERIC;tr|A0A6A4L2V9|A0A6A4L2V9_9ERIC;tr|A0A834G4S9|A0A834G4S9_RHOSS	tr|A0A834G500|A0A834G500_RHOSS Pyruvate dehydrogenase E1 component subunit alpha OS=Rhododendron simsii OX=118357 GN=RHSIM_Rhsim12G0052000 PE=4 SV=1;tr|A0A6A4L8T9|A0A6A4L8T9_9ERIC E1_dh domain-containing protein (Fragment) OS=Rhododendron williamsianum OX=	25.1471	25.1862	25.1191	46.712	96.61
tr|A0A834LMS1|A0A834LMS1_RHOSS;tr|A0A6A4LKJ1|A0A6A4LKJ1_9ERIC;tr|A0A834LRD6|A0A834LRD6_RHOSS;tr|A0A834H544|A0A834H544_RHOSS;tr|A0A6A4LPW5|A0A6A4LPW5_9ERIC	tr|A0A834LMS1|A0A834LMS1_RHOSS Tryptophan synthase OS=Rhododendron simsii OX=118357 GN=RHSIM_Rhsim06G0214300 PE=3 SV=1;tr|A0A6A4LKJ1|A0A6A4LKJ1_9ERIC Tryptophan synthase (Fragment) OS=Rhododendron williamsianum OX=262921 GN=C3L33_09880 PE=3 SV=1;tr|A0A834L	NaN	23.5426	24.0218	44.435	96.159
tr|A0A834GJX6|A0A834GJX6_RHOSS;tr|A0A834FV17|A0A834FV17_RHOSS;tr|A0A834GI92|A0A834GI92_RHOSS	tr|A0A834GJX6|A0A834GJX6_RHOSS Uncharacterized protein OS=Rhododendron simsii OX=118357 GN=RHSIM_Rhsim08G0192300 PE=3 SV=1;tr|A0A834FV17|A0A834FV17_RHOSS Uncharacterized protein OS=Rhododendron simsii OX=118357 GN=RHSIM_RhsimUnG0162400 PE=3 SV=1;tr|A0A834G	NaN	NaN	26.143	35.825	94.733
tr|A0A834LIZ7|A0A834LIZ7_RHOSS;tr|A0A6A4LU60|A0A6A4LU60_9ERIC	tr|A0A834LIZ7|A0A834LIZ7_RHOSS Peptidase A1 domain-containing protein OS=Rhododendron simsii OX=118357 GN=RHSIM_Rhsim07G0067500 PE=3 SV=1;tr|A0A6A4LU60|A0A6A4LU60_9ERIC Peptidase A1 domain-containing protein (Fragment) OS=Rhododendron williamsianum OX=2629	27.8626	27.458	26.3701	47.472	94.104
tr|A0A6A4L0A7|A0A6A4L0A7_9ERIC;tr|A0A834LFR9|A0A834LFR9_RHOSS	tr|A0A6A4L0A7|A0A6A4L0A7_9ERIC W2 domain-containing protein (Fragment) OS=Rhododendron williamsianum OX=262921 GN=C3L33_16910 PE=3 SV=1;tr|A0A834LFR9|A0A834LFR9_RHOSS W2 domain-containing protein OS=Rhododendron simsii OX=118357 GN=RHSIM_Rhsim09G0130400 PE	22.6187	22.2461	NaN	53.667	93.468
tr|A0A6A4KYB1|A0A6A4KYB1_9ERIC;tr|A0A834LFX9|A0A834LFX9_RHOSS;tr|A0A834GDU7|A0A834GDU7_RHOSS;tr|A0A834GB03|A0A834GB03_RHOSS;tr|A0A6A4KR19|A0A6A4KR19_9ERIC	tr|A0A6A4KYB1|A0A6A4KYB1_9ERIC Guanosine nucleotide diphosphate dissociation inhibitor (Fragment) OS=Rhododendron williamsianum OX=262921 GN=C3L33_17587 PE=3 SV=1;tr|A0A834LFX9|A0A834LFX9_RHOSS Guanosine nucleotide diphosphate dissociation inhibitor OS=Rho	25.0632	24.3535	24.7876	46.155	91.488
tr|A0A834LPW2|A0A834LPW2_RHOSS;tr|A0A6A4LBQ1|A0A6A4LBQ1_9ERIC;tr|A0A6A4M5R7|A0A6A4M5R7_9ERIC;tr|A0A834H3Q3|A0A834H3Q3_RHOSS;tr|A0A6A4M5X1|A0A6A4M5X1_9ERIC;tr|A0A834FWW1|A0A834FWW1_RHOSS;tr|A0A834GCH4|A0A834GCH4_RHOSS	tr|A0A834LPW2|A0A834LPW2_RHOSS Pyruvate kinase OS=Rhododendron simsii OX=118357 GN=RHSIM_Rhsim04G0136600 PE=3 SV=1;tr|A0A6A4LBQ1|A0A6A4LBQ1_9ERIC Pyruvate kinase (Fragment) OS=Rhododendron williamsianum OX=262921 GN=C3L33_12355 PE=3 SV=1;tr|A0A6A4M5R7|A0A6	22.2764	NaN	22.0894	57.496	91.155
tr|A0A834LM48|A0A834LM48_RHOSS;tr|A0A6A4KXD8|A0A6A4KXD8_9ERIC;tr|A0A834GX97|A0A834GX97_RHOSS;tr|A0A6A4LFE7|A0A6A4LFE7_9ERIC;tr|A0A834GXP5|A0A834GXP5_RHOSS	tr|A0A834LM48|A0A834LM48_RHOSS Asparagine--tRNA ligase OS=Rhododendron simsii OX=118357 GN=RHSIM_Rhsim05G0030300 PE=3 SV=1	NaN	25.2902	25.7558	63.524	90.96
tr|A0A6A4LKF0|A0A6A4LKF0_9ERIC;tr|A0A834GLB4|A0A834GLB4_RHOSS	tr|A0A6A4LKF0|A0A6A4LKF0_9ERIC Peptidase A1 domain-containing protein (Fragment) OS=Rhododendron williamsianum OX=262921 GN=C3L33_09234 PE=3 SV=1;tr|A0A834GLB4|A0A834GLB4_RHOSS Peptidase A1 domain-containing protein OS=Rhododendron simsii OX=118357 GN=RHSI	27.1142	27.7712	28.3323	41.749	87.88
tr|A0A6A4MB24|A0A6A4MB24_9ERIC;tr|A0A834LV54|A0A834LV54_RHOSS	tr|A0A6A4MB24|A0A6A4MB24_9ERIC Peptidylprolyl isomerase (Fragment) OS=Rhododendron williamsianum OX=262921 GN=C3L33_04382 PE=4 SV=1;tr|A0A834LV54|A0A834LV54_RHOSS Peptidylprolyl isomerase OS=Rhododendron simsii OX=118357 GN=RHSIM_Rhsim01G0249900 PE=4 SV=1	24.5481	24.2244	25.2264	64.016	87.365
tr|A0A834LUR2|A0A834LUR2_RHOSS;tr|A0A6A4MBT2|A0A6A4MBT2_9ERIC;tr|A0A834HJL8|A0A834HJL8_RHOSS;tr|A0A6A4M776|A0A6A4M776_9ERIC	tr|A0A834LUR2|A0A834LUR2_RHOSS 60S ribosomal protein L13 OS=Rhododendron simsii OX=118357 GN=RHSIM_Rhsim03G0219500 PE=3 SV=1;tr|A0A6A4MBT2|A0A6A4MBT2_9ERIC 60S ribosomal protein L13 (Fragment) OS=Rhododendron williamsianum OX=262921 GN=C3L33_03444 PE=3 SV=	24.1893	NaN	24.0557	23.861	87.053
tr|A0A834LWL5|A0A834LWL5_RHOSS;tr|A0A6A4LZ88|A0A6A4LZ88_9ERIC;tr|A0A834HC70|A0A834HC70_RHOSS;tr|A0A834HAD9|A0A834HAD9_RHOSS;tr|A0A1J0A0N4|A0A1J0A0N4_RHOML;tr|I1U4K9|I1U4K9_9ERIC;tr|A0A834H8C8|A0A834H8C8_RHOSS;tr|A0A834H9L9|A0A834H9L9_RHOSS;tr|A0A6A4LDX6|A0A6A4LDX6_9ERIC;tr|A0A6A4LMP1|A0A6A4LMP1_9ERIC;tr|A0A6A4KZH1|A0A6A4KZH1_9ERIC;tr|A0A6A4L8Z0|A0A6A4L8Z0_9ERIC;tr|A0A6A4MBW9|A0A6A4MBW9_9ERIC	tr|A0A834LWL5|A0A834LWL5_RHOSS Elongation factor 1-alpha OS=Rhododendron simsii OX=118357 GN=RHSIM_Rhsim01G0219100 PE=3 SV=1;tr|A0A6A4LZ88|A0A6A4LZ88_9ERIC Elongation factor 1-alpha (Fragment) OS=Rhododendron williamsianum OX=262921 GN=C3L33_04637 PE=3 SV=	27.912	27.6712	27.2578	49.484	86.411
tr|A0A6A4M707|A0A6A4M707_9ERIC;tr|A0A834GJU7|A0A834GJU7_RHOSS;tr|A0A834GP77|A0A834GP77_RHOSS;tr|A0A834GM52|A0A834GM52_RHOSS	tr|A0A6A4M707|A0A6A4M707_9ERIC DHQ_synthase domain-containing protein (Fragment) OS=Rhododendron williamsianum OX=262921 GN=C3L33_01726 PE=3 SV=1;tr|A0A834GJU7|A0A834GJU7_RHOSS DHQ_synthase domain-containing protein OS=Rhododendron simsii OX=118357 GN=RHSI	NaN	NaN	23.9767	45.566	86.376
tr|A0A834LDN9|A0A834LDN9_RHOSS;tr|A0A6A4L0U5|A0A6A4L0U5_9ERIC	tr|A0A834LDN9|A0A834LDN9_RHOSS PKS_ER domain-containing protein OS=Rhododendron simsii OX=118357 GN=RHSIM_Rhsim09G0195700 PE=3 SV=1	27.7624	27.4656	26.5629	38.979	86.017
tr|A0A6A4LM51|A0A6A4LM51_9ERIC;tr|A0A834FZE9|A0A834FZE9_RHOSS	tr|A0A6A4LM51|A0A6A4LM51_9ERIC Pectin acetylesterase (Fragment) OS=Rhododendron williamsianum OX=262921 GN=C3L33_08971 PE=3 SV=1	26.7882	26.5241	26.6562	33.959	84.22
tr|A0A834FWC3|A0A834FWC3_RHOSS;tr|A0A6A4KUJ9|A0A6A4KUJ9_9ERIC	tr|A0A834FWC3|A0A834FWC3_RHOSS Aminotran_1_2 domain-containing protein OS=Rhododendron simsii OX=118357 GN=RHSIM_RhsimUnG0094700 PE=4 SV=1;tr|A0A6A4KUJ9|A0A6A4KUJ9_9ERIC Aminotran_1_2 domain-containing protein (Fragment) OS=Rhododendron williamsianum OX=26	25.0534	25.4769	25.425	48.996	84.157
tr|A0A834G7L1|A0A834G7L1_RHOSS	tr|A0A834G7L1|A0A834G7L1_RHOSS Fructose-bisphosphate aldolase OS=Rhododendron simsii OX=118357 GN=RHSIM_Rhsim11G0183800 PE=3 SV=1	27.877	27.015	26.8442	41.983	83.78
tr|A0A834H8M9|A0A834H8M9_RHOSS;tr|A0A6A4LMW5|A0A6A4LMW5_9ERIC	tr|A0A834H8M9|A0A834H8M9_RHOSS Fructose-bisphosphate aldolase OS=Rhododendron simsii OX=118357 GN=RHSIM_Rhsim04G0009800 PE=3 SV=1	29.7214	NaN	29.7276	38.393	83.71
tr|A0A834GV24|A0A834GV24_RHOSS	tr|A0A834GV24|A0A834GV24_RHOSS Peptidase_S9 domain-containing protein OS=Rhododendron simsii OX=118357 GN=RHSIM_Rhsim06G0046300 PE=4 SV=1	25.7757	NaN	25.1171	86.402	83.377
tr|A0A834G776|A0A834G776_RHOSS;tr|A0A6A4LI37|A0A6A4LI37_9ERIC	tr|A0A834G776|A0A834G776_RHOSS Tryptophanyl-tRNA synthetase OS=Rhododendron simsii OX=118357 GN=RHSIM_Rhsim12G0003500 PE=3 SV=1;tr|A0A6A4LI37|A0A6A4LI37_9ERIC Tryptophanyl-tRNA synthetase (Fragment) OS=Rhododendron williamsianum OX=262921 GN=C3L33_13173 PE	23.8361	NaN	23.4919	50.738	83.34
tr|A0A834LA35|A0A834LA35_RHOSS;tr|A0A6A4LD56|A0A6A4LD56_9ERIC;tr|A0A6A4KP57|A0A6A4KP57_9ERIC	tr|A0A834LA35|A0A834LA35_RHOSS Uncharacterized protein OS=Rhododendron simsii OX=118357 GN=RHSIM_Rhsim12G0136400 PE=3 SV=1;tr|A0A6A4LD56|A0A6A4LD56_9ERIC Uncharacterized protein (Fragment) OS=Rhododendron williamsianum OX=262921 GN=C3L33_14136 PE=3 SV=1	NaN	24.8771	24.8929	123.03	82.898
tr|A0A834H781|A0A834H781_RHOSS;tr|A0A834LIJ6|A0A834LIJ6_RHOSS;tr|A0A6A4LEN1|A0A6A4LEN1_9ERIC;tr|A0A834GU17|A0A834GU17_RHOSS;tr|A0A834GWM7|A0A834GWM7_RHOSS;tr|A0A834GB27|A0A834GB27_RHOSS;tr|A0A6A4L1U1|A0A6A4L1U1_9ERIC	tr|A0A834H781|A0A834H781_RHOSS Aldedh domain-containing protein OS=Rhododendron simsii OX=118357 GN=RHSIM_Rhsim03G0256500 PE=3 SV=1;tr|A0A834LIJ6|A0A834LIJ6_RHOSS Aldedh domain-containing protein OS=Rhododendron simsii OX=118357 GN=RHSIM_Rhsim07G0163900 PE	24.0889	NaN	NaN	53.115	82.404
tr|A0A834H419|A0A834H419_RHOSS;tr|A0A6A4MEE4|A0A6A4MEE4_9ERIC	tr|A0A834H419|A0A834H419_RHOSS Malate dehydrogenase [NADP], chloroplastic OS=Rhododendron simsii OX=118357 GN=RHSIM_Rhsim03G0111900 PE=3 SV=1	NaN	25.119	23.9461	47.841	81.843
tr|A0A6A4MJ14|A0A6A4MJ14_9ERIC;tr|A0A834LXI1|A0A834LXI1_RHOSS	tr|A0A6A4MJ14|A0A6A4MJ14_9ERIC Uncharacterized protein (Fragment) OS=Rhododendron williamsianum OX=262921 GN=C3L33_02156 PE=3 SV=1	NaN	25.746	26.3573	142.66	81.34
tr|A0A6A4LY36|A0A6A4LY36_9ERIC;tr|A0A834HG76|A0A834HG76_RHOSS;tr|A0A6A4L9J2|A0A6A4L9J2_9ERIC;tr|A0A834H1R6|A0A834H1R6_RHOSS	tr|A0A6A4LY36|A0A6A4LY36_9ERIC RRM domain-containing protein (Fragment) OS=Rhododendron williamsianum OX=262921 GN=C3L33_05083 PE=3 SV=1;tr|A0A834HG76|A0A834HG76_RHOSS RRM domain-containing protein OS=Rhododendron simsii OX=118357 GN=RHSIM_Rhsim01G0145200	NaN	NaN	24.3378	82.009	80.614
tr|A0A834LHP6|A0A834LHP6_RHOSS;tr|A0A6A4MLR0|A0A6A4MLR0_9ERIC	tr|A0A834LHP6|A0A834LHP6_RHOSS Isocitrate dehydrogenase [NADP] OS=Rhododendron simsii OX=118357 GN=RHSIM_Rhsim08G0052400 PE=3 SV=1;tr|A0A6A4MLR0|A0A6A4MLR0_9ERIC Isocitrate dehydrogenase (NADP(+)) (Fragment) OS=Rhododendron williamsianum OX=262921 GN=C3L33	26.8858	27.159	27.3204	53.248	78.7
tr|A0A6A4M353|A0A6A4M353_9ERIC;tr|A0A834LTR7|A0A834LTR7_RHOSS	tr|A0A6A4M353|A0A6A4M353_9ERIC Uncharacterized protein (Fragment) OS=Rhododendron williamsianum OX=262921 GN=C3L33_04247 PE=3 SV=1;tr|A0A834LTR7|A0A834LTR7_RHOSS Uncharacterized protein OS=Rhododendron simsii OX=118357 GN=RHSIM_Rhsim01G0263300 PE=3 SV=1	27.6088	26.5683	27.9779	51.618	78.31
tr|A0A834LKG0|A0A834LKG0_RHOSS;tr|A0A6A4LYY1|A0A6A4LYY1_9ERIC	tr|A0A834LKG0|A0A834LKG0_RHOSS Pyr_redox_2 domain-containing protein OS=Rhododendron simsii OX=118357 GN=RHSIM_Rhsim07G0087700 PE=4 SV=1;tr|A0A6A4LYY1|A0A6A4LYY1_9ERIC Pyr_redox_2 domain-containing protein (Fragment) OS=Rhododendron williamsianum OX=262921	23.9531	NaN	23.3827	54.106	77.072
tr|A0A6A4LTT7|A0A6A4LTT7_9ERIC;tr|A0A834H780|A0A834H780_RHOSS	tr|A0A6A4LTT7|A0A6A4LTT7_9ERIC ECH_2 domain-containing protein (Fragment) OS=Rhododendron williamsianum OX=262921 GN=C3L33_03661 PE=4 SV=1;tr|A0A834H780|A0A834H780_RHOSS ECH_2 domain-containing protein OS=Rhododendron simsii OX=118357 GN=RHSIM_Rhsim03G0244	26.0395	NaN	25.8449	47.166	76.847
tr|A0A834LF82|A0A834LF82_RHOSS	tr|A0A834LF82|A0A834LF82_RHOSS Alpha-galactosidase OS=Rhododendron simsii OX=118357 GN=RHSIM_Rhsim09G0025700 PE=3 SV=1	NaN	24.6902	24.9291	44.831	75.619
tr|A0A834H2F3|A0A834H2F3_RHOSS;tr|A0A834LQI9|A0A834LQI9_RHOSS;tr|A0A6A4KVW0|A0A6A4KVW0_9ERIC;tr|A0A6A4L0K5|A0A6A4L0K5_9ERIC	tr|A0A834H2F3|A0A834H2F3_RHOSS Isoleucyl-tRNA synthetase OS=Rhododendron simsii OX=118357 GN=RHSIM_Rhsim05G0075700 PE=3 SV=1	NaN	25.9121	25.5824	144.02	75.214
tr|A0A834G7H2|A0A834G7H2_RHOSS;tr|A0A6A4M7V2|A0A6A4M7V2_9ERIC	tr|A0A834G7H2|A0A834G7H2_RHOSS Acyl-coenzyme A oxidase OS=Rhododendron simsii OX=118357 GN=RHSIM_Rhsim11G0003700 PE=3 SV=1;tr|A0A6A4M7V2|A0A6A4M7V2_9ERIC ACOX domain-containing protein (Fragment) OS=Rhododendron williamsianum OX=262921 GN=C3L33_05235 PE=3	24.8235	NaN	NaN	87.934	74.545
tr|A0A834GR00|A0A834GR00_RHOSS;tr|A0A6A4LHM4|A0A6A4LHM4_9ERIC	tr|A0A834GR00|A0A834GR00_RHOSS Malic enzyme OS=Rhododendron simsii OX=118357 GN=RHSIM_Rhsim07G0018800 PE=3 SV=1;tr|A0A6A4LHM4|A0A6A4LHM4_9ERIC Malic enzyme (Fragment) OS=Rhododendron williamsianum OX=262921 GN=C3L33_08008 PE=3 SV=1	24.7253	24.2862	NaN	66.637	74.213
tr|A0A6A4LUE6|A0A6A4LUE6_9ERIC;tr|A0A834FYV5|A0A834FYV5_RHOSS;tr|A0A834FW55|A0A834FW55_RHOSS	tr|A0A6A4LUE6|A0A6A4LUE6_9ERIC Fumarylacetoacetase (Fragment) OS=Rhododendron williamsianum OX=262921 GN=C3L33_06478 PE=3 SV=1;tr|A0A834FYV5|A0A834FYV5_RHOSS Fumarylacetoacetase OS=Rhododendron simsii OX=118357 GN=RHSIM_Rhsim13G0146300 PE=3 SV=1;tr|A0A834F	26.582	26.7015	26.4396	43.516	73.849
tr|A0A834LK28|A0A834LK28_RHOSS;tr|A0A834FZ38|A0A834FZ38_RHOSS;tr|A9ZMJ3|A9ZMJ3_9ERIC;tr|A0A385ZAE6|A0A385ZAE6_VACCO;tr|A0A6A4KPR3|A0A6A4KPR3_9ERIC	tr|A0A834LK28|A0A834LK28_RHOSS Fe2OG dioxygenase domain-containing protein OS=Rhododendron simsii OX=118357 GN=RHSIM_Rhsim07G0247500 PE=3 SV=1;tr|A0A834FZ38|A0A834FZ38_RHOSS Fe2OG dioxygenase domain-containing protein OS=Rhododendron simsii OX=118357 GN=RH	NaN	NaN	25.178	40.553	72.396
tr|A0A834HND6|A0A834HND6_RHOSS;tr|A0A834H9C8|A0A834H9C8_RHOSS;tr|A0A6A4L8U0|A0A6A4L8U0_9ERIC	tr|A0A834HND6|A0A834HND6_RHOSS Protein kinase domain-containing protein OS=Rhododendron simsii OX=118357 GN=RHSIM_Rhsim02G0075300 PE=4 SV=1	NaN	NaN	25.2158	37.273	72.173
tr|A0A834LIC4|A0A834LIC4_RHOSS;tr|A0A6A4LZT4|A0A6A4LZT4_9ERIC	tr|A0A834LIC4|A0A834LIC4_RHOSS Transketolase OS=Rhododendron simsii OX=118357 GN=RHSIM_Rhsim07G0028800 PE=3 SV=1;tr|A0A6A4LZT4|A0A6A4LZT4_9ERIC Transketolase (Fragment) OS=Rhododendron williamsianum OX=262921 GN=C3L33_08092 PE=3 SV=1	25.7736	NaN	24.5168	80.175	71.834
tr|A0A6A4L444|A0A6A4L444_9ERIC;tr|A0A834HBC9|A0A834HBC9_RHOSS;tr|A0A834LQ17|A0A834LQ17_RHOSS;tr|A0A834L9X3|A0A834L9X3_RHOSS;tr|A0A834GVA6|A0A834GVA6_RHOSS	tr|A0A6A4L444|A0A6A4L444_9ERIC Uncharacterized protein (Fragment) OS=Rhododendron williamsianum OX=262921 GN=C3L33_15155 PE=3 SV=1;tr|A0A834HBC9|A0A834HBC9_RHOSS Uncharacterized protein OS=Rhododendron simsii OX=118357 GN=RHSIM_Rhsim02G0053400 PE=3 SV=1	NaN	NaN	24.0179	46.9	71.449
tr|A0A6A4LNT2|A0A6A4LNT2_9ERIC;tr|A0A834GKM5|A0A834GKM5_RHOSS;tr|A0A6A4MN10|A0A6A4MN10_9ERIC	tr|A0A6A4LNT2|A0A6A4LNT2_9ERIC PCI domain-containing protein (Fragment) OS=Rhododendron williamsianum OX=262921 GN=C3L33_11850 PE=4 SV=1;tr|A0A834GKM5|A0A834GKM5_RHOSS PCI domain-containing protein OS=Rhododendron simsii OX=118357 GN=RHSIM_Rhsim08G0185100	25.9384	NaN	25.4214	44.32	70.849
tr|A0A6A4KG27|A0A6A4KG27_9ERIC;tr|A0A834G8B8|A0A834G8B8_RHOSS	tr|A0A6A4KG27|A0A6A4KG27_9ERIC Uncharacterized protein (Fragment) OS=Rhododendron williamsianum OX=262921 GN=C3L33_20790 PE=4 SV=1;tr|A0A834G8B8|A0A834G8B8_RHOSS Coatomer subunit alpha OS=Rhododendron simsii OX=118357 GN=RHSIM_Rhsim11G0182000 PE=4 SV=1	26.0894	26.85	26.627	139.95	69.616
tr|A0A6A4KFZ4|A0A6A4KFZ4_9ERIC	tr|A0A6A4KFZ4|A0A6A4KFZ4_9ERIC D-fructose-1,6-bisphosphate 1-phosphohydrolase (Fragment) OS=Rhododendron williamsianum OX=262921 GN=C3L33_21108 PE=3 SV=1	22.1723	21.4228	21.0011	43.319	67.513
tr|A0A834H854|A0A834H854_RHOSS;tr|A0A6A4LM55|A0A6A4LM55_9ERIC;tr|A0A834GXP6|A0A834GXP6_RHOSS;tr|A0A6A4KV13|A0A6A4KV13_9ERIC	tr|A0A834H854|A0A834H854_RHOSS Isocitrate dehydrogenase [NAD] subunit, mitochondrial OS=Rhododendron simsii OX=118357 GN=RHSIM_Rhsim04G0145600 PE=3 SV=1;tr|A0A6A4LM55|A0A6A4LM55_9ERIC Isocitrate dehydrogenase [NAD] subunit, mitochondrial (Fragment) OS=Rhod	26.5708	26.6181	27.514	35.371	67.396
tr|A0A834G6X0|A0A834G6X0_RHOSS;tr|A0A6A4KCA0|A0A6A4KCA0_9ERIC	tr|A0A834G6X0|A0A834G6X0_RHOSS Tr-type G domain-containing protein OS=Rhododendron simsii OX=118357 GN=RHSIM_Rhsim11G0045300 PE=3 SV=1;tr|A0A6A4KCA0|A0A6A4KCA0_9ERIC Tr-type G domain-containing protein (Fragment) OS=Rhododendron williamsianum OX=262921 GN=	24.4627	24.2058	NaN	94	65.737
tr|A0A6A4LS19|A0A6A4LS19_9ERIC;tr|A0A834L759|A0A834L759_RHOSS;tr|A0A834HHQ2|A0A834HHQ2_RHOSS;tr|A0A6A4MAY8|A0A6A4MAY8_9ERIC	tr|A0A6A4LS19|A0A6A4LS19_9ERIC Succinate-CoA ligase subunit beta (Fragment) OS=Rhododendron williamsianum OX=262921 GN=C3L33_07373 PE=3 SV=1;tr|A0A834L759|A0A834L759_RHOSS Succinate--CoA ligase [ADP-forming] subunit beta, mitochondrial OS=Rhododendron sims	26.8812	27.0764	26.7471	45.09	65.295
tr|A0A834L8C4|A0A834L8C4_RHOSS;tr|A0A6A4L8S1|A0A6A4L8S1_9ERIC;tr|A0A834L8Z4|A0A834L8Z4_RHOSS;tr|A0A6A4LBQ0|A0A6A4LBQ0_9ERIC	tr|A0A834L8C4|A0A834L8C4_RHOSS Leucyl-tRNA synthetase OS=Rhododendron simsii OX=118357 GN=RHSIM_Rhsim12G0137900 PE=3 SV=1;tr|A0A6A4L8S1|A0A6A4L8S1_9ERIC Leucyl-tRNA synthetase (Fragment) OS=Rhododendron williamsianum OX=262921 GN=C3L33_14152 PE=3 SV=1;tr|A	NaN	NaN	24.7155	146.35	64.115
tr|A0A834GI97|A0A834GI97_RHOSS	tr|A0A834GI97|A0A834GI97_RHOSS GDP-mannose 4,6-dehydratase OS=Rhododendron simsii OX=118357 GN=RHSIM_Rhsim08G0034400 PE=3 SV=1	26.0154	26.1811	24.6751	41.741	62.199
tr|A0A834LQ21|A0A834LQ21_RHOSS;tr|A0A6A4KY08|A0A6A4KY08_9ERIC	tr|A0A834LQ21|A0A834LQ21_RHOSS Pyruvate decarboxylase OS=Rhododendron simsii OX=118357 GN=RHSIM_Rhsim05G0219500 PE=3 SV=1	25.0595	25.8404	25.9041	68.165	62.153
tr|A0A834LHJ1|A0A834LHJ1_RHOSS;tr|A0A834LKV8|A0A834LKV8_RHOSS;tr|A0A834H0M4|A0A834H0M4_RHOSS;tr|A0A834GY02|A0A834GY02_RHOSS;tr|A0A6A4KXH7|A0A6A4KXH7_9ERIC;tr|A0A6A4LYQ5|A0A6A4LYQ5_9ERIC	tr|A0A834LHJ1|A0A834LHJ1_RHOSS Aldo_ket_red domain-containing protein OS=Rhododendron simsii OX=118357 GN=RHSIM_Rhsim08G0011000 PE=4 SV=1;tr|A0A834LKV8|A0A834LKV8_RHOSS Aldo_ket_red domain-containing protein OS=Rhododendron simsii OX=118357 GN=RHSIM_Rhsim0	24.8577	NaN	25.4432	38.383	61.606
tr|A0A6A4MCL8|A0A6A4MCL8_9ERIC;tr|A0A834H767|A0A834H767_RHOSS	tr|A0A6A4MCL8|A0A6A4MCL8_9ERIC Tripeptidyl-peptidase II (Fragment) OS=Rhododendron williamsianum OX=262921 GN=C3L33_03223 PE=3 SV=1;tr|A0A834H767|A0A834H767_RHOSS Tripeptidyl-peptidase II OS=Rhododendron simsii OX=118357 GN=RHSIM_Rhsim03G0187200 PE=3 SV=1	NaN	25.0298	24.9565	166.38	61.33
tr|A0A834H072|A0A834H072_RHOSS;tr|A0A834G7C1|A0A834G7C1_RHOSS;tr|A0A834G0R2|A0A834G0R2_RHOSS;tr|A0A6A4LKU9|A0A6A4LKU9_9ERIC	tr|A0A834H072|A0A834H072_RHOSS (S)-2-hydroxy-acid oxidase OS=Rhododendron simsii OX=118357 GN=RHSIM_Rhsim04G0033100 PE=3 SV=1;tr|A0A834G7C1|A0A834G7C1_RHOSS (S)-2-hydroxy-acid oxidase OS=Rhododendron simsii OX=118357 GN=RHSIM_Rhsim13G0114900 PE=3 SV=1;tr|A	26.453	NaN	25.7599	40.367	61.07
tr|A0A6A4KZY5|A0A6A4KZY5_9ERIC;tr|A0A834LKA4|A0A834LKA4_RHOSS;tr|A0A6A4LIK3|A0A6A4LIK3_9ERIC;tr|A0A834LLH7|A0A834LLH7_RHOSS	tr|A0A6A4KZY5|A0A6A4KZY5_9ERIC D-3-phosphoglycerate dehydrogenase (Fragment) OS=Rhododendron williamsianum OX=262921 GN=C3L33_19635 PE=3 SV=1;tr|A0A834LKA4|A0A834LKA4_RHOSS D-3-phosphoglycerate dehydrogenase OS=Rhododendron simsii OX=118357 GN=RHSIM_Rhsim0	24.6918	NaN	NaN	62.297	61.06
tr|A0A834HBW5|A0A834HBW5_RHOSS;tr|A0A834H3P5|A0A834H3P5_RHOSS;tr|A0A6A4L6P0|A0A6A4L6P0_9ERIC;tr|A0A6A4LBV2|A0A6A4LBV2_9ERIC	tr|A0A834HBW5|A0A834HBW5_RHOSS Dihydrolipoyl dehydrogenase OS=Rhododendron simsii OX=118357 GN=RHSIM_Rhsim02G0001500 PE=3 SV=1;tr|A0A834H3P5|A0A834H3P5_RHOSS Dihydrolipoyl dehydrogenase OS=Rhododendron simsii OX=118357 GN=RHSIM_Rhsim04G0244400 PE=3 SV=1;tr	24.338	24.1021	24.669	54.425	59.132
tr|A0A834G7U9|A0A834G7U9_RHOSS;tr|A0A6A4LDF1|A0A6A4LDF1_9ERIC	tr|A0A834G7U9|A0A834G7U9_RHOSS Uncharacterized protein OS=Rhododendron simsii OX=118357 GN=RHSIM_Rhsim12G0209200 PE=4 SV=1;tr|A0A6A4LDF1|A0A6A4LDF1_9ERIC Uncharacterized protein (Fragment) OS=Rhododendron williamsianum OX=262921 GN=C3L33_14719 PE=4 SV=1	24.9694	22.8578	22.1099	44.453	58.859
tr|A0A834GH00|A0A834GH00_RHOSS;tr|A0A834GMV5|A0A834GMV5_RHOSS;tr|A0A6A4M6H5|A0A6A4M6H5_9ERIC	tr|A0A834GH00|A0A834GH00_RHOSS Uncharacterized protein OS=Rhododendron simsii OX=118357 GN=RHSIM_Rhsim08G0006400 PE=4 SV=1;tr|A0A834GMV5|A0A834GMV5_RHOSS Uncharacterized protein OS=Rhododendron simsii OX=118357 GN=RHSIM_Rhsim08G0007100 PE=4 SV=1;tr|A0A6A4M	25.4916	24.8969	23.8312	45.907	56.695
tr|A0A834HF26|A0A834HF26_RHOSS;tr|A0A6A4M543|A0A6A4M543_9ERIC	tr|A0A834HF26|A0A834HF26_RHOSS Epimerase domain-containing protein OS=Rhododendron simsii OX=118357 GN=RHSIM_Rhsim01G0209500 PE=4 SV=1;tr|A0A6A4M543|A0A6A4M543_9ERIC Epimerase domain-containing protein (Fragment) OS=Rhododendron williamsianum OX=262921 GN=	NaN	25.3978	25.4732	43.695	54.747
tr|A0A6A4LRB5|A0A6A4LRB5_9ERIC;tr|A0A834L6A4|A0A834L6A4_RHOSS;tr|A0A834HE51|A0A834HE51_RHOSS;tr|A0A6A4LB28|A0A6A4LB28_9ERIC	tr|A0A6A4LRB5|A0A6A4LRB5_9ERIC Elongation factor Tu (Fragment) OS=Rhododendron williamsianum OX=262921 GN=C3L33_07521 PE=3 SV=1;tr|A0A834L6A4|A0A834L6A4_RHOSS Elongation factor Tu OS=Rhododendron simsii OX=118357 GN=RHSIM_Rhsim13G0022100 PE=3 SV=1;tr|A0A83	25.714	25.6564	NaN	48.173	54.599
tr|A0A6A4MDB3|A0A6A4MDB3_9ERIC;tr|A0A834LSC8|A0A834LSC8_RHOSS	tr|A0A6A4MDB3|A0A6A4MDB3_9ERIC Uncharacterized protein (Fragment) OS=Rhododendron williamsianum OX=262921 GN=C3L33_02048 PE=3 SV=1;tr|A0A834LSC8|A0A834LSC8_RHOSS Uncharacterized protein OS=Rhododendron simsii OX=118357 GN=RHSIM_Rhsim03G0018900 PE=3 SV=1	NaN	NaN	25.1911	31.91	54.382
tr|A0A6A4MQU4|A0A6A4MQU4_9ERIC;tr|A0A834LDU1|A0A834LDU1_RHOSS	tr|A0A6A4MQU4|A0A6A4MQU4_9ERIC 1-deoxy-D-xylulose-5-phosphate reductoisomerase (Fragment) OS=Rhododendron williamsianum OX=262921 GN=C3L33_00701 PE=3 SV=1;tr|A0A834LDU1|A0A834LDU1_RHOSS 1-deoxy-D-xylulose-5-phosphate reductoisomerase OS=Rhododendron simsii	23.5826	23.7223	23.3038	42.845	53.839
tr|A0A834H566|A0A834H566_RHOSS	tr|A0A834H566|A0A834H566_RHOSS ABC1 domain-containing protein OS=Rhododendron simsii OX=118357 GN=RHSIM_Rhsim06G0177200 PE=4 SV=1	24.9141	24.0367	23.6178	88.608	52.15
tr|A0A834GPC0|A0A834GPC0_RHOSS;tr|A0A6A4LGZ9|A0A6A4LGZ9_9ERIC;tr|A0A6A4LVQ4|A0A6A4LVQ4_9ERIC	tr|A0A834GPC0|A0A834GPC0_RHOSS SERPIN domain-containing protein OS=Rhododendron simsii OX=118357 GN=RHSIM_Rhsim07G0233000 PE=3 SV=1;tr|A0A6A4LGZ9|A0A6A4LGZ9_9ERIC SERPIN domain-containing protein (Fragment) OS=Rhododendron williamsianum OX=262921 GN=C3L33_	24.9449	24.3805	24.3649	41.666	50.687
tr|A0A834H350|A0A834H350_RHOSS	tr|A0A834H350|A0A834H350_RHOSS Aminotran_1_2 domain-containing protein OS=Rhododendron simsii OX=118357 GN=RHSIM_Rhsim04G0022700 PE=3 SV=1	NaN	22.4654	22.8185	46.548	47.112
tr|A0A834L8T3|A0A834L8T3_RHOSS;tr|A0A834G2Z5|A0A834G2Z5_RHOSS	tr|A0A834L8T3|A0A834L8T3_RHOSS PKS_ER domain-containing protein OS=Rhododendron simsii OX=118357 GN=RHSIM_Rhsim12G0008600 PE=3 SV=1;tr|A0A834G2Z5|A0A834G2Z5_RHOSS Uncharacterized protein OS=Rhododendron simsii OX=118357 GN=RHSIM_Rhsim12G0008800 PE=4 SV=1	23.5405	NaN	24.4507	71.031	46.515
tr|A0A834GFN9|A0A834GFN9_RHOSS;tr|A0A834GBM9|A0A834GBM9_RHOSS;tr|A0A834G9Z0|A0A834G9Z0_RHOSS;tr|A0A834GYP7|A0A834GYP7_RHOSS;tr|A0A834GHS5|A0A834GHS5_RHOSS;tr|A0A6A4KR36|A0A6A4KR36_9ERIC;tr|A0A6A4L1F1|A0A6A4L1F1_9ERIC	tr|A0A834GFN9|A0A834GFN9_RHOSS PKS_ER domain-containing protein OS=Rhododendron simsii OX=118357 GN=RHSIM_Rhsim10G0174500 PE=3 SV=1;tr|A0A834GBM9|A0A834GBM9_RHOSS PKS_ER domain-containing protein OS=Rhododendron simsii OX=118357 GN=RHSIM_Rhsim10G0174300 PE	27.4257	28.7082	29.0398	39.041	44.971
tr|A0A6A4LED2|A0A6A4LED2_9ERIC;tr|A0A6A4LDT9|A0A6A4LDT9_9ERIC;tr|A0A6B9S3J1|A0A6B9S3J1_9ERIC;tr|A0A6B9S1Q9|A0A6B9S1Q9_9ERIC;tr|A0A2Z5TVQ4|A0A2Z5TVQ4_KALPR;tr|A0A2Z5TVH2|A0A2Z5TVH2_KALPR;tr|C8ZLJ5|C8ZLJ5_RHOSS	tr|A0A6A4LED2|A0A6A4LED2_9ERIC Gp_dh_N domain-containing protein (Fragment) OS=Rhododendron williamsianum OX=262921 GN=C3L33_14436 PE=3 SV=1;tr|A0A6A4LDT9|A0A6A4LDT9_9ERIC Gp_dh_N domain-containing protein (Fragment) OS=Rhododendron williamsianum OX=262921	27.9821	26.5995	28.2445	33.081	44.64
tr|A0A834H8W0|A0A834H8W0_RHOSS;tr|A0A834H951|A0A834H951_RHOSS;tr|A0A834FTP7|A0A834FTP7_RHOSS;tr|A0A834L3S1|A0A834L3S1_RHOSS	tr|A0A834H8W0|A0A834H8W0_RHOSS Uncharacterized protein OS=Rhododendron simsii OX=118357 GN=RHSIM_Rhsim03G0042000 PE=3 SV=1;tr|A0A834H951|A0A834H951_RHOSS Uncharacterized protein OS=Rhododendron simsii OX=118357 GN=RHSIM_Rhsim03G0041800 PE=3 SV=1;tr|A0A834F	21.0475	20.8238	NaN	32.844	44.326
tr|A0A834HFM0|A0A834HFM0_RHOSS	tr|A0A834HFM0|A0A834HFM0_RHOSS Uncharacterized protein OS=Rhododendron simsii OX=118357 GN=RHSIM_Rhsim01G0263100 PE=3 SV=1	24.2961	NaN	24.0897	52.22	44.08
tr|A0A834HJL6|A0A834HJL6_RHOSS;tr|A0A6A4LVT2|A0A6A4LVT2_9ERIC	tr|A0A834HJL6|A0A834HJL6_RHOSS Serine/threonine-protein phosphatase OS=Rhododendron simsii OX=118357 GN=RHSIM_Rhsim01G0200700 PE=3 SV=1;tr|A0A6A4LVT2|A0A6A4LVT2_9ERIC Serine/threonine-protein phosphatase (Fragment) OS=Rhododendron williamsianum OX=262921 G	NaN	24.5151	24.7094	110.75	43.996
tr|A0A834G7G5|A0A834G7G5_RHOSS	tr|A0A834G7G5|A0A834G7G5_RHOSS Carboxypeptidase OS=Rhododendron simsii OX=118357 GN=RHSIM_Rhsim11G0168200 PE=3 SV=1	NaN	24.8525	NaN	52.639	43.476
tr|A0A834LHP7|A0A834LHP7_RHOSS	tr|A0A834LHP7|A0A834LHP7_RHOSS Uncharacterized protein OS=Rhododendron simsii OX=118357 GN=RHSIM_Rhsim07G0093000 PE=4 SV=1	24.9507	NaN	NaN	24.095	42.028
tr|A0A6A4LMQ1|A0A6A4LMQ1_9ERIC;tr|A0A834GVF1|A0A834GVF1_RHOSS	tr|A0A6A4LMQ1|A0A6A4LMQ1_9ERIC Uncharacterized protein (Fragment) OS=Rhododendron williamsianum OX=262921 GN=C3L33_10407 PE=3 SV=1;tr|A0A834GVF1|A0A834GVF1_RHOSS 26S proteasome non-ATPase regulatory subunit 2 homolog OS=Rhododendron simsii OX=118357 GN=RHS	23.9172	24.1839	NaN	90.613	41.953
tr|A0A834H743|A0A834H743_RHOSS;tr|A0A6A4LLM8|A0A6A4LLM8_9ERIC;tr|A0A2H4KDN8|A0A2H4KDN8_RHOFO	tr|A0A834H743|A0A834H743_RHOSS Glutamine synthetase OS=Rhododendron simsii OX=118357 GN=RHSIM_Rhsim04G0209400 PE=3 SV=1;tr|A0A6A4LLM8|A0A6A4LLM8_9ERIC Glutamine synthetase (Fragment) OS=Rhododendron williamsianum OX=262921 GN=C3L33_12780 PE=3 SV=1	24.9166	25.6937	24.9903	49.919	41.591
tr|A0A834HCB8|A0A834HCB8_RHOSS	tr|A0A834HCB8|A0A834HCB8_RHOSS Aldo_ket_red domain-containing protein OS=Rhododendron simsii OX=118357 GN=RHSIM_Rhsim02G0056400 PE=4 SV=1	NaN	NaN	23.9537	45.249	40.974
tr|A0A834GBR4|A0A834GBR4_RHOSS	tr|A0A834GBR4|A0A834GBR4_RHOSS Uncharacterized protein OS=Rhododendron simsii OX=118357 GN=RHSIM_Rhsim11G0173300 PE=4 SV=1	NaN	24.1842	NaN	83.957	40.701
tr|A0A834LQF7|A0A834LQF7_RHOSS;tr|A0A6A4LBW2|A0A6A4LBW2_9ERIC;tr|A0A6A4L499|A0A6A4L499_9ERIC;tr|A0A834LSY3|A0A834LSY3_RHOSS;tr|A0A6A4LW85|A0A6A4LW85_9ERIC;tr|A0A834GKZ3|A0A834GKZ3_RHOSS;tr|A0A6A4LC76|A0A6A4LC76_9ERIC;tr|A0A834FZU5|A0A834FZU5_RHOSS;tr|A0A6A4M3K6|A0A6A4M3K6_9ERIC	tr|A0A834LQF7|A0A834LQF7_RHOSS Protein kinase domain-containing protein OS=Rhododendron simsii OX=118357 GN=RHSIM_Rhsim04G0247700 PE=3 SV=1;tr|A0A6A4LBW2|A0A6A4LBW2_9ERIC Protein kinase domain-containing protein (Fragment) OS=Rhododendron williamsianum OX=	24.5333	24.8255	25.2891	41.74	40.612
tr|A0A834LME0|A0A834LME0_RHOSS;tr|A0A834H588|A0A834H588_RHOSS;tr|A0A6A4M2J9|A0A6A4M2J9_9ERIC;tr|A0A6A4L0Z4|A0A6A4L0Z4_9ERIC	tr|A0A834LME0|A0A834LME0_RHOSS KH type-2 domain-containing protein OS=Rhododendron simsii OX=118357 GN=RHSIM_Rhsim05G0012000 PE=3 SV=1;tr|A0A834H588|A0A834H588_RHOSS KH type-2 domain-containing protein OS=Rhododendron simsii OX=118357 GN=RHSIM_Rhsim03G0229	NaN	24.7769	NaN	26.845	40.609
tr|A0A834H5V6|A0A834H5V6_RHOSS;tr|A0A6A4LI97|A0A6A4LI97_9ERIC;tr|A0A6A4LA76|A0A6A4LA76_9ERIC;tr|A0A834H5E2|A0A834H5E2_RHOSS	tr|A0A834H5V6|A0A834H5V6_RHOSS Uncharacterized protein OS=Rhododendron simsii OX=118357 GN=RHSIM_Rhsim04G0038100 PE=4 SV=1;tr|A0A6A4LI97|A0A6A4LI97_9ERIC Uncharacterized protein (Fragment) OS=Rhododendron williamsianum OX=262921 GN=C3L33_10650 PE=4 SV=1	22.9408	24.3981	24.5327	44.31	39.549
tr|A0A834G1M8|A0A834G1M8_RHOSS;tr|A0A6A4LBV9|A0A6A4LBV9_9ERIC;tr|A0A834LM92|A0A834LM92_RHOSS	tr|A0A834G1M8|A0A834G1M8_RHOSS Uncharacterized protein OS=Rhododendron simsii OX=118357 GN=RHSIM_Rhsim12G0195700 PE=3 SV=1;tr|A0A6A4LBV9|A0A6A4LBV9_9ERIC Aminotran_1_2 domain-containing protein (Fragment) OS=Rhododendron williamsianum OX=262921 GN=C3L33_14	NaN	NaN	25.3939	49.828	39.433
tr|A0A6A4L8Y7|A0A6A4L8Y7_9ERIC;tr|A0A834L8H1|A0A834L8H1_RHOSS	tr|A0A6A4L8Y7|A0A6A4L8Y7_9ERIC Transaldolase (Fragment) OS=Rhododendron williamsianum OX=262921 GN=C3L33_13294 PE=3 SV=1;tr|A0A834L8H1|A0A834L8H1_RHOSS Transaldolase OS=Rhododendron simsii OX=118357 GN=RHSIM_Rhsim12G0017100 PE=3 SV=1	24.7444	24.9259	25.6576	48.168	39.227
tr|A0A834FZN3|A0A834FZN3_RHOSS;tr|A0A6A4LS46|A0A6A4LS46_9ERIC;tr|A0A6A4LMI9|A0A6A4LMI9_9ERIC;tr|A0A6A4L108|A0A6A4L108_9ERIC;tr|A0A6A4L2F5|A0A6A4L2F5_9ERIC;tr|A0A834GEK4|A0A834GEK4_RHOSS;tr|A0A834HD74|A0A834HD74_RHOSS;tr|A0A834GND4|A0A834GND4_RHOSS	tr|A0A834FZN3|A0A834FZN3_RHOSS AAA domain-containing protein OS=Rhododendron simsii OX=118357 GN=RHSIM_Rhsim13G0058000 PE=3 SV=1;tr|A0A6A4LS46|A0A6A4LS46_9ERIC AAA domain-containing protein (Fragment) OS=Rhododendron williamsianum OX=262921 GN=C3L33_07188	NaN	20.5492	NaN	49.853	37.252
tr|A0A834HIS1|A0A834HIS1_RHOSS;tr|A0A834HI73|A0A834HI73_RHOSS;tr|A0A834LQQ6|A0A834LQQ6_RHOSS;tr|A0A834FUE4|A0A834FUE4_RHOSS;tr|A0A6A4M4L7|A0A6A4M4L7_9ERIC	tr|A0A834HIS1|A0A834HIS1_RHOSS CYTOSOL_AP domain-containing protein OS=Rhododendron simsii OX=118357 GN=RHSIM_Rhsim01G0033300 PE=3 SV=1;tr|A0A834HI73|A0A834HI73_RHOSS CYTOSOL_AP domain-containing protein OS=Rhododendron simsii OX=118357 GN=RHSIM_Rhsim01G00	24.3671	22.9777	23.279	55.095	36.031
tr|A0A6A4MBK3|A0A6A4MBK3_9ERIC;tr|A0A834HAE4|A0A834HAE4_RHOSS	tr|A0A6A4MBK3|A0A6A4MBK3_9ERIC Oxidored_FMN domain-containing protein (Fragment) OS=Rhododendron williamsianum OX=262921 GN=C3L33_03523 PE=3 SV=1;tr|A0A834HAE4|A0A834HAE4_RHOSS Oxidored_FMN domain-containing protein OS=Rhododendron simsii OX=118357 GN=RHSI	NaN	21.6097	21.6435	42.958	35.092
tr|A0A6A4KEI2|A0A6A4KEI2_9ERIC;tr|A0A834GYW9|A0A834GYW9_RHOSS;tr|A0A6A4L036|A0A6A4L036_9ERIC	tr|A0A6A4KEI2|A0A6A4KEI2_9ERIC Protein kinase domain-containing protein (Fragment) OS=Rhododendron williamsianum OX=262921 GN=C3L33_21226 PE=3 SV=1	NaN	NaN	24.6995	34.081	34.99
tr|A0A834G3V1|A0A834G3V1_RHOSS;tr|A0A6A4L301|A0A6A4L301_9ERIC;tr|A0A6A4MMA9|A0A6A4MMA9_9ERIC;tr|A0A834GLZ6|A0A834GLZ6_RHOSS	tr|A0A834G3V1|A0A834G3V1_RHOSS Aldedh domain-containing protein OS=Rhododendron simsii OX=118357 GN=RHSIM_Rhsim12G0047500 PE=3 SV=1;tr|A0A6A4L301|A0A6A4L301_9ERIC Aldedh domain-containing protein (Fragment) OS=Rhododendron williamsianum OX=262921 GN=C3L33_	24.9485	25.9996	26.08	55.174	34.687
tr|A0A834L639|A0A834L639_RHOSS;tr|A0A6A4LWF1|A0A6A4LWF1_9ERIC	tr|A0A834L639|A0A834L639_RHOSS Pyruvate kinase OS=Rhododendron simsii OX=118357 GN=RHSIM_Rhsim13G0234600 PE=3 SV=1;tr|A0A6A4LWF1|A0A6A4LWF1_9ERIC Pyruvate kinase (Fragment) OS=Rhododendron williamsianum OX=262921 GN=C3L33_05734 PE=3 SV=1	24.9819	NaN	NaN	53.866	34.54
tr|A0A834GJ02|A0A834GJ02_RHOSS	tr|A0A834GJ02|A0A834GJ02_RHOSS PKS_ER domain-containing protein OS=Rhododendron simsii OX=118357 GN=RHSIM_Rhsim09G0052100 PE=4 SV=1	25.5063	26.155	26.043	60.227	33.435
tr|Q71N69|Q71N69_PHYCU	tr|Q71N69|Q71N69_PHYCU Ribulose bisphosphate carboxylase large chain (Fragment) OS=Phyllodoce caerulea OX=49155 GN=rbcL PE=3 SV=1	24.557	NaN	NaN	46.998	33.261
tr|A0A834GX72|A0A834GX72_RHOSS;tr|A0A6A4KSA9|A0A6A4KSA9_9ERIC	tr|A0A834GX72|A0A834GX72_RHOSS Uncharacterized protein OS=Rhododendron simsii OX=118357 GN=RHSIM_Rhsim05G0056500 PE=3 SV=1	27.0224	NaN	26.0824	42.602	32.63
tr|A0A834L673|A0A834L673_RHOSS	tr|A0A834L673|A0A834L673_RHOSS Uncharacterized protein OS=Rhododendron simsii OX=118357 GN=RHSIM_Rhsim13G0035100 PE=3 SV=1	30.9181	30.9141	30.9242	54.436	32.279
tr|A0A6A4LGZ3|A0A6A4LGZ3_9ERIC	tr|A0A6A4LGZ3|A0A6A4LGZ3_9ERIC Uncharacterized protein (Fragment) OS=Rhododendron williamsianum OX=262921 GN=C3L33_14321 PE=4 SV=1	22.5829	21.8915	NaN	45.066	31.356
tr|A0A834GK42|A0A834GK42_RHOSS;tr|A0A6A4MQW6|A0A6A4MQW6_9ERIC	tr|A0A834GK42|A0A834GK42_RHOSS V-type proton ATPase subunit C OS=Rhododendron simsii OX=118357 GN=RHSIM_Rhsim08G0195300 PE=3 SV=1;tr|A0A6A4MQW6|A0A6A4MQW6_9ERIC V-type proton ATPase subunit C (Fragment) OS=Rhododendron williamsianum OX=262921 GN=C3L33_0049	NaN	NaN	25.9896	52.043	31.05
tr|A0A6A4MN12|A0A6A4MN12_9ERIC;tr|A0A6A4KSK6|A0A6A4KSK6_9ERIC;tr|A0A834GPD8|A0A834GPD8_RHOSS;tr|A0A6A4MLD0|A0A6A4MLD0_9ERIC;tr|A0A834LQA4|A0A834LQA4_RHOSS;tr|A0A834LH56|A0A834LH56_RHOSS;tr|A0A834GAY0|A0A834GAY0_RHOSS;tr|A0A834G2T6|A0A834G2T6_RHOSS;tr|A0A6A4M135|A0A6A4M135_9ERIC;tr|A0A6A4LYH5|A0A6A4LYH5_9ERIC;tr|A0A6A4L275|A0A6A4L275_9ERIC;tr|A0A834HIN5|A0A834HIN5_RHOSS	tr|A0A6A4MN12|A0A6A4MN12_9ERIC Uncharacterized protein (Fragment) OS=Rhododendron williamsianum OX=262921 GN=C3L33_01342 PE=3 SV=1;tr|A0A6A4KSK6|A0A6A4KSK6_9ERIC Tubulin_C domain-containing protein (Fragment) OS=Rhododendron williamsianum OX=262921 GN=C3L3	NaN	25.4916	NaN	38.933	30.819
tr|A0A834LMR4|A0A834LMR4_RHOSS;tr|A0A6A4LL16|A0A6A4LL16_9ERIC	tr|A0A834LMR4|A0A834LMR4_RHOSS Uncharacterized protein OS=Rhododendron simsii OX=118357 GN=RHSIM_Rhsim04G0243100 PE=4 SV=1;tr|A0A6A4LL16|A0A6A4LL16_9ERIC Uncharacterized protein (Fragment) OS=Rhododendron williamsianum OX=262921 GN=C3L33_13030 PE=4 SV=1	NaN	24.0573	24.3363	48.009	30.194
tr|A0A834LB94|A0A834LB94_RHOSS	tr|A0A834LB94|A0A834LB94_RHOSS PKS_ER domain-containing protein OS=Rhododendron simsii OX=118357 GN=RHSIM_Rhsim11G0160000 PE=4 SV=1	NaN	NaN	24.7396	37.793	30.187
tr|A0A6A4L448|A0A6A4L448_9ERIC	tr|A0A6A4L448|A0A6A4L448_9ERIC Methylenetetrahydrofolate reductase (Fragment) OS=Rhododendron williamsianum OX=262921 GN=C3L33_17583 PE=3 SV=1	23.7204	24.4092	23.4209	66.877	30.186
tr|A0A834LXF4|A0A834LXF4_RHOSS;tr|A0A6A4LRL3|A0A6A4LRL3_9ERIC;tr|A0A834HIV1|A0A834HIV1_RHOSS;tr|A0A834FYA1|A0A834FYA1_RHOSS	tr|A0A834LXF4|A0A834LXF4_RHOSS Uncharacterized protein OS=Rhododendron simsii OX=118357 GN=RHSIM_Rhsim01G0235200 PE=4 SV=1;tr|A0A6A4LRL3|A0A6A4LRL3_9ERIC Uncharacterized protein (Fragment) OS=Rhododendron williamsianum OX=262921 GN=C3L33_04511 PE=4 SV=1;tr	24.6016	NaN	25.0598	66.356	29.642
tr|A0A6A4KIP1|A0A6A4KIP1_9ERIC;tr|A0A6A4M1E0|A0A6A4M1E0_9ERIC	tr|A0A6A4KIP1|A0A6A4KIP1_9ERIC Uncharacterized protein (Fragment) OS=Rhododendron williamsianum OX=262921 GN=C3L33_22096 PE=4 SV=1;tr|A0A6A4M1E0|A0A6A4M1E0_9ERIC Uncharacterized protein (Fragment) OS=Rhododendron williamsianum OX=262921 GN=C3L33_03932 PE=4	NaN	25.446	24.9264	44.804	29.544
tr|A0A834HFD1|A0A834HFD1_RHOSS;tr|A0A6A4LRG3|A0A6A4LRG3_9ERIC	tr|A0A834HFD1|A0A834HFD1_RHOSS Uncharacterized protein OS=Rhododendron simsii OX=118357 GN=RHSIM_Rhsim01G0224200 PE=3 SV=1;tr|A0A6A4LRG3|A0A6A4LRG3_9ERIC Uncharacterized protein (Fragment) OS=Rhododendron williamsianum OX=262921 GN=C3L33_04588 PE=3 SV=1	25.8536	NaN	26.4243	38.461	28.883
tr|A0A834H6I3|A0A834H6I3_RHOSS;tr|A0A6A4M1J8|A0A6A4M1J8_9ERIC;tr|A0A834GD83|A0A834GD83_RHOSS;tr|A0A6A4L5B6|A0A6A4L5B6_9ERIC	tr|A0A834H6I3|A0A834H6I3_RHOSS Mannose-1-phosphate guanylyltransferase OS=Rhododendron simsii OX=118357 GN=RHSIM_Rhsim03G0136400 PE=4 SV=1;tr|A0A6A4M1J8|A0A6A4M1J8_9ERIC Mannose-1-phosphate guanylyltransferase (Fragment) OS=Rhododendron williamsianum OX=26	NaN	23.4328	23.2938	39.607	27.783
tr|A0A6A4M0P7|A0A6A4M0P7_9ERIC;tr|A0A834H033|A0A834H033_RHOSS	tr|A0A6A4M0P7|A0A6A4M0P7_9ERIC Alpha-aminoacylpeptide hydrolase (Fragment) OS=Rhododendron williamsianum OX=262921 GN=C3L33_07779 PE=3 SV=1;tr|A0A834H033|A0A834H033_RHOSS Aminopeptidase OS=Rhododendron simsii OX=118357 GN=RHSIM_Rhsim07G0175300 PE=3 SV=1	24.5	24.8944	NaN	80.327	27.585
tr|A0A6A4MK40|A0A6A4MK40_9ERIC	tr|A0A6A4MK40|A0A6A4MK40_9ERIC HP domain-containing protein (Fragment) OS=Rhododendron williamsianum OX=262921 GN=C3L33_02037 PE=4 SV=1	NaN	22.6375	23.316	57.811	27.003
tr|A0A0A7NXC7|A0A0A7NXC7_9ERIC	tr|A0A0A7NXC7|A0A0A7NXC7_9ERIC Ribulose bisphosphate carboxylase large chain (Fragment) OS=Erica vagans OX=270446 GN=rbcL PE=3 SV=1	23.0314	NaN	NaN	43.041	26.801
tr|A0A834G2M6|A0A834G2M6_RHOSS	tr|A0A834G2M6|A0A834G2M6_RHOSS Amidohydro-rel domain-containing protein OS=Rhododendron simsii OX=118357 GN=RHSIM_Rhsim13G0210400 PE=4 SV=1	26.1086	NaN	NaN	23.672	26.736
tr|A0A834GWF3|A0A834GWF3_RHOSS;tr|A0A6A4L8Q0|A0A6A4L8Q0_9ERIC	tr|A0A834GWF3|A0A834GWF3_RHOSS Uncharacterized protein OS=Rhododendron simsii OX=118357 GN=RHSIM_Rhsim06G0009700 PE=3 SV=1;tr|A0A6A4L8Q0|A0A6A4L8Q0_9ERIC Uncharacterized protein (Fragment) OS=Rhododendron williamsianum OX=262921 GN=C3L33_11221 PE=3 SV=1	NaN	24.1612	23.6038	59.923	25.635
tr|A0A6A4MFQ9|A0A6A4MFQ9_9ERIC	tr|A0A6A4MFQ9|A0A6A4MFQ9_9ERIC PCI domain-containing protein (Fragment) OS=Rhododendron williamsianum OX=262921 GN=C3L33_01459 PE=3 SV=1	24.6533	24.7144	NaN	52.258	24.285
tr|A0A834HCF4|A0A834HCF4_RHOSS;tr|A0A6A4L6M8|A0A6A4L6M8_9ERIC;tr|A0A6A4L4B1|A0A6A4L4B1_9ERIC;tr|A0A834GFH2|A0A834GFH2_RHOSS	tr|A0A834HCF4|A0A834HCF4_RHOSS 6-phosphogluconate dehydrogenase, decarboxylating OS=Rhododendron simsii OX=118357 GN=RHSIM_Rhsim02G0239600 PE=3 SV=1;tr|A0A6A4L6M8|A0A6A4L6M8_9ERIC 6-phosphogluconate dehydrogenase, decarboxylating (Fragment) OS=Rhododendron	23.3897	NaN	NaN	52.467	24.074
tr|A0A834GVD2|A0A834GVD2_RHOSS;tr|A0A6A4LBV7|A0A6A4LBV7_9ERIC	tr|A0A834GVD2|A0A834GVD2_RHOSS Dolichyl-diphosphooligosaccharide--protein glycosyltransferase subunit 1 OS=Rhododendron simsii OX=118357 GN=RHSIM_Rhsim06G0004300 PE=3 SV=1	NaN	NaN	23.6308	68.631	22.96
tr|A0A6A4LFB0|A0A6A4LFB0_9ERIC;tr|A0A834LJD1|A0A834LJD1_RHOSS	tr|A0A6A4LFB0|A0A6A4LFB0_9ERIC Glucose-6-phosphate isomerase (Fragment) OS=Rhododendron williamsianum OX=262921 GN=C3L33_11042 PE=3 SV=1;tr|A0A834LJD1|A0A834LJD1_RHOSS Glucose-6-phosphate isomerase OS=Rhododendron simsii OX=118357 GN=RHSIM_Rhsim06G0034400	22.0614	NaN	NaN	54.167	22.896
tr|A0A6A4KYN0|A0A6A4KYN0_9ERIC	tr|A0A6A4KYN0|A0A6A4KYN0_9ERIC Uncharacterized protein (Fragment) OS=Rhododendron williamsianum OX=262921 GN=C3L33_20078 PE=4 SV=1	20.4969	20.866	NaN	41.427	22.447
tr|A0A834HB70|A0A834HB70_RHOSS;tr|A0A6A4KWN5|A0A6A4KWN5_9ERIC	tr|A0A834HB70|A0A834HB70_RHOSS PKS_ER domain-containing protein OS=Rhododendron simsii OX=118357 GN=RHSIM_Rhsim02G0255500 PE=3 SV=1;tr|A0A6A4KWN5|A0A6A4KWN5_9ERIC PKS_ER domain-containing protein (Fragment) OS=Rhododendron williamsianum OX=262921 GN=C3L33_	NaN	24.2306	NaN	42.883	22.396
tr|A0A6A4KXE4|A0A6A4KXE4_9ERIC;tr|A0A834GIW6|A0A834GIW6_RHOSS	tr|A0A6A4KXE4|A0A6A4KXE4_9ERIC Uncharacterized protein (Fragment) OS=Rhododendron williamsianum OX=262921 GN=C3L33_17740 PE=3 SV=1;tr|A0A834GIW6|A0A834GIW6_RHOSS V-type proton ATPase subunit OS=Rhododendron simsii OX=118357 GN=RHSIM_Rhsim09G0146300 PE=3 SV	NaN	25.135	NaN	29.242	21.923
tr|A0A834H0C3|A0A834H0C3_RHOSS	tr|A0A834H0C3|A0A834H0C3_RHOSS S-adenosylmethionine synthase OS=Rhododendron simsii OX=118357 GN=RHSIM_Rhsim05G0121700 PE=3 SV=1	NaN	25.9248	25.8536	43.048	21.867
tr|A0A6A4L1K3|A0A6A4L1K3_9ERIC;tr|A0A834GFK9|A0A834GFK9_RHOSS;tr|K0GF22|K0GF22_9ERIC;tr|A0A834GCE0|A0A834GCE0_RHOSS;tr|A0A834LEC9|A0A834LEC9_RHOSS;tr|A0A834H3W9|A0A834H3W9_RHOSS	tr|A0A6A4L1K3|A0A6A4L1K3_9ERIC Beta-fructofuranosidase (Fragment) OS=Rhododendron williamsianum OX=262921 GN=C3L33_16481 PE=3 SV=1;tr|A0A834GFK9|A0A834GFK9_RHOSS Beta-fructofuranosidase OS=Rhododendron simsii OX=118357 GN=RHSIM_Rhsim09G0191800 PE=3 SV=1;tr	NaN	NaN	26.6453	60.885	21.447
tr|A0A6A4ME79|A0A6A4ME79_9ERIC;tr|A0A834HAW5|A0A834HAW5_RHOSS;tr|A0A6A4L7Q7|A0A6A4L7Q7_9ERIC;tr|A0A834LEU1|A0A834LEU1_RHOSS;tr|A0A834FV12|A0A834FV12_RHOSS	tr|A0A6A4ME79|A0A6A4ME79_9ERIC Glycerol-3-phosphate dehydrogenase (Fragment) OS=Rhododendron williamsianum OX=262921 GN=C3L33_02794 PE=3 SV=1;tr|A0A834HAW5|A0A834HAW5_RHOSS Glycerol-3-phosphate dehydrogenase OS=Rhododendron simsii OX=118357 GN=RHSIM_Rhsim0	NaN	23.0875	22.8696	50.968	20.949
tr|A0A6A4KFW9|A0A6A4KFW9_9ERIC;tr|A0A6A4M8I4|A0A6A4M8I4_9ERIC;tr|A0A834LD04|A0A834LD04_RHOSS	tr|A0A6A4KFW9|A0A6A4KFW9_9ERIC Uncharacterized protein (Fragment) OS=Rhododendron williamsianum OX=262921 GN=C3L33_23510 PE=4 SV=1;tr|A0A6A4M8I4|A0A6A4M8I4_9ERIC Uncharacterized protein (Fragment) OS=Rhododendron williamsianum OX=262921 GN=C3L33_00507 PE=3	NaN	NaN	26.808	14.693	20.451
tr|A0A834GBR3|A0A834GBR3_RHOSS;tr|A0A834GBN8|A0A834GBN8_RHOSS	tr|A0A834GBR3|A0A834GBR3_RHOSS PKS_ER domain-containing protein OS=Rhododendron simsii OX=118357 GN=RHSIM_Rhsim10G0175100 PE=3 SV=1;tr|A0A834GBN8|A0A834GBN8_RHOSS PKS_ER domain-containing protein OS=Rhododendron simsii OX=118357 GN=RHSIM_Rhsim10G0174600 PE	NaN	NaN	23.1981	38.873	20.065
tr|G1CT32|G1CT32_RHOIN	tr|G1CT32|G1CT32_RHOIN Glyceraldehyde-3-phosphate dehydrogenase GAPC2 (Fragment) OS=Rhododendron indicum OX=75581 PE=3 SV=1	NaN	NaN	24.2659	21.221	19.498
tr|A0A834H5A8|A0A834H5A8_RHOSS	tr|A0A834H5A8|A0A834H5A8_RHOSS Uncharacterized protein OS=Rhododendron simsii OX=118357 GN=RHSIM_Rhsim03G0041200 PE=3 SV=1	NaN	25.8301	25.4464	87.601	19.493
tr|A0A6A4M8F8|A0A6A4M8F8_9ERIC;tr|A0A834HH93|A0A834HH93_RHOSS	tr|A0A6A4M8F8|A0A6A4M8F8_9ERIC Uncharacterized protein (Fragment) OS=Rhododendron williamsianum OX=262921 GN=C3L33_05024 PE=4 SV=1;tr|A0A834HH93|A0A834HH93_RHOSS Uncharacterized protein OS=Rhododendron simsii OX=118357 GN=RHSIM_Rhsim01G0147300 PE=4 SV=1	NaN	23.405	23.7046	47.172	18.808
tr|A0A6A4LI26|A0A6A4LI26_9ERIC;tr|A0A834GPU5|A0A834GPU5_RHOSS	tr|A0A6A4LI26|A0A6A4LI26_9ERIC COPIIcoated_ERV domain-containing protein (Fragment) OS=Rhododendron williamsianum OX=262921 GN=C3L33_07798 PE=4 SV=1;tr|A0A834GPU5|A0A834GPU5_RHOSS Uncharacterized protein OS=Rhododendron simsii OX=118357 GN=RHSIM_Rhsim07G01	NaN	NaN	23.9014	36.165	18.702
tr|A0A6A4M8Z4|A0A6A4M8Z4_9ERIC;tr|A0A834GMQ0|A0A834GMQ0_RHOSS	tr|A0A6A4M8Z4|A0A6A4M8Z4_9ERIC PALP domain-containing protein (Fragment) OS=Rhododendron williamsianum OX=262921 GN=C3L33_01060 PE=3 SV=1;tr|A0A834GMQ0|A0A834GMQ0_RHOSS Uncharacterized protein OS=Rhododendron simsii OX=118357 GN=RHSIM_Rhsim08G0124200 PE=3	25.0257	NaN	24.0309	43.888	17.259
tr|A0A834LB58|A0A834LB58_RHOSS;tr|A0A6A4L6V0|A0A6A4L6V0_9ERIC	tr|A0A834LB58|A0A834LB58_RHOSS CTP_transf_like domain-containing protein OS=Rhododendron simsii OX=118357 GN=RHSIM_Rhsim09G0103900 PE=4 SV=1;tr|A0A6A4L6V0|A0A6A4L6V0_9ERIC CTP_transf_like domain-containing protein (Fragment) OS=Rhododendron williamsianum O	25.6246	NaN	25.6207	44.287	16.95
tr|A0A6A4KUR6|A0A6A4KUR6_9ERIC	tr|A0A6A4KUR6|A0A6A4KUR6_9ERIC Uncharacterized protein (Fragment) OS=Rhododendron williamsianum OX=262921 GN=C3L33_21563 PE=3 SV=1	NaN	25.3379	25.2433	48.054	16.754
tr|A0A6A4MK32|A0A6A4MK32_9ERIC	tr|A0A6A4MK32|A0A6A4MK32_9ERIC Uncharacterized protein (Fragment) OS=Rhododendron williamsianum OX=262921 GN=C3L33_00483 PE=3 SV=1	23.7737	NaN	24.0569	90.798	16.583
tr|A0A834H4W8|A0A834H4W8_RHOSS;tr|A0A6A4LDK6|A0A6A4LDK6_9ERIC;tr|A0A834GWC7|A0A834GWC7_RHOSS;tr|A0A6A4LFT2|A0A6A4LFT2_9ERIC	tr|A0A834H4W8|A0A834H4W8_RHOSS Vesicle-fusing ATPase OS=Rhododendron simsii OX=118357 GN=RHSIM_Rhsim04G0021300 PE=3 SV=1;tr|A0A6A4LDK6|A0A6A4LDK6_9ERIC Vesicle-fusing ATPase (Fragment) OS=Rhododendron williamsianum OX=262921 GN=C3L33_11686 PE=3 SV=1;tr|A0A	25.4731	23.2193	22.8906	82.664	16.552
tr|A0A6A4LZD3|A0A6A4LZD3_9ERIC;tr|A0A6A4M7A2|A0A6A4M7A2_9ERIC;tr|A0A834G029|A0A834G029_RHOSS	tr|A0A6A4LZD3|A0A6A4LZD3_9ERIC Uncharacterized protein (Fragment) OS=Rhododendron williamsianum OX=262921 GN=C3L33_06655 PE=4 SV=1;tr|A0A6A4M7A2|A0A6A4M7A2_9ERIC Uncharacterized protein (Fragment) OS=Rhododendron williamsianum OX=262921 GN=C3L33_00908 PE=4	NaN	24.5579	NaN	166.25	16.364
tr|A0A6A4L8T3|A0A6A4L8T3_9ERIC;tr|A0A834LAV4|A0A834LAV4_RHOSS;tr|A0A834G2V3|A0A834G2V3_RHOSS;tr|A0A6A4M7Y5|A0A6A4M7Y5_9ERIC;tr|A0A834LEN8|A0A834LEN8_RHOSS;tr|A0A6A4L139|A0A6A4L139_9ERIC;tr|A0A6A4L0L4|A0A6A4L0L4_9ERIC;tr|A0A834GDK9|A0A834GDK9_RHOSS	tr|A0A6A4L8T3|A0A6A4L8T3_9ERIC Allene-oxide cyclase (Fragment) OS=Rhododendron williamsianum OX=262921 GN=C3L33_13428 PE=3 SV=1;tr|A0A834LAV4|A0A834LAV4_RHOSS Allene-oxide cyclase OS=Rhododendron simsii OX=118357 GN=RHSIM_Rhsim10G0063500 PE=3 SV=1;tr|A0A83	NaN	NaN	21.621	22.909	16.088
tr|A0A6A4KUL8|A0A6A4KUL8_9ERIC;tr|A0A834LEX9|A0A834LEX9_RHOSS;tr|A0A6A4LYS4|A0A6A4LYS4_9ERIC;tr|A0A834FYA5|A0A834FYA5_RHOSS	tr|A0A6A4KUL8|A0A6A4KUL8_9ERIC Carboxypeptidase (Fragment) OS=Rhododendron williamsianum OX=262921 GN=C3L33_16792 PE=3 SV=1;tr|A0A834LEX9|A0A834LEX9_RHOSS Carboxypeptidase OS=Rhododendron simsii OX=118357 GN=RHSIM_Rhsim09G0147200 PE=3 SV=1;tr|A0A6A4LYS4|A0	23.9332	NaN	NaN	56.062	15.902
tr|A0A834GLR0|A0A834GLR0_RHOSS;tr|A0A834GJ70|A0A834GJ70_RHOSS;tr|A0A834L6D5|A0A834L6D5_RHOSS;tr|A0A6A4MP17|A0A6A4MP17_9ERIC	tr|A0A834GLR0|A0A834GLR0_RHOSS Uncharacterized protein OS=Rhododendron simsii OX=118357 GN=RHSIM_Rhsim08G0221200 PE=4 SV=1;tr|A0A834GJ70|A0A834GJ70_RHOSS Uncharacterized protein OS=Rhododendron simsii OX=118357 GN=RHSIM_Rhsim08G0221100 PE=4 SV=1;tr|A0A834L	NaN	21.5491	22.1811	103.7	15.818
tr|A0A834LFP2|A0A834LFP2_RHOSS;tr|A0A834L611|A0A834L611_RHOSS;tr|A0A834GFY5|A0A834GFY5_RHOSS;tr|A0A834LZE7|A0A834LZE7_RHOSS;tr|A0A834LIS3|A0A834LIS3_RHOSS;tr|A0A834GVZ4|A0A834GVZ4_RHOSS;tr|A0A834G514|A0A834G514_RHOSS	tr|A0A834LFP2|A0A834LFP2_RHOSS Uncharacterized protein OS=Rhododendron simsii OX=118357 GN=RHSIM_Rhsim08G0053200 PE=3 SV=1;tr|A0A834L611|A0A834L611_RHOSS Uncharacterized protein OS=Rhododendron simsii OX=118357 GN=RHSIM_Rhsim12G0044000 PE=3 SV=1;tr|A0A834G	22.7687	NaN	NaN	24.177	15.78
tr|A0A6A4LRN4|A0A6A4LRN4_9ERIC;tr|A0A6A4LW53|A0A6A4LW53_9ERIC	tr|A0A6A4LRN4|A0A6A4LRN4_9ERIC Uncharacterized protein (Fragment) OS=Rhododendron williamsianum OX=262921 GN=C3L33_07406 PE=3 SV=1	27.124	26.9235	28.1418	95.658	15.698
tr|A0A834GGF6|A0A834GGF6_RHOSS;tr|A0A6A4MNK6|A0A6A4MNK6_9ERIC	tr|A0A834GGF6|A0A834GGF6_RHOSS Uncharacterized protein OS=Rhododendron simsii OX=118357 GN=RHSIM_Rhsim08G0128800 PE=3 SV=1;tr|A0A6A4MNK6|A0A6A4MNK6_9ERIC Uncharacterized protein (Fragment) OS=Rhododendron williamsianum OX=262921 GN=C3L33_01015 PE=3 SV=1	NaN	NaN	20.0528	61.239	15.628
tr|A0A834FTL5|A0A834FTL5_RHOSS	tr|A0A834FTL5|A0A834FTL5_RHOSS Uncharacterized protein OS=Rhododendron simsii OX=118357 GN=RHSIM_RhsimUnG0226200 PE=3 SV=1	NaN	24.0935	24.615	108.85	14.178
tr|A0A6A4LHK2|A0A6A4LHK2_9ERIC;tr|A0A834HBG6|A0A834HBG6_RHOSS	tr|A0A6A4LHK2|A0A6A4LHK2_9ERIC Uncharacterized protein (Fragment) OS=Rhododendron williamsianum OX=262921 GN=C3L33_12130 PE=4 SV=1;tr|A0A834HBG6|A0A834HBG6_RHOSS Uncharacterized protein OS=Rhododendron simsii OX=118357 GN=RHSIM_Rhsim04G0102400 PE=4 SV=1	NaN	25.0889	24.5918	36.727	14.055
tr|A0A834GD15|A0A834GD15_RHOSS;tr|A0A6A4KU69|A0A6A4KU69_9ERIC	tr|A0A834GD15|A0A834GD15_RHOSS Uricase OS=Rhododendron simsii OX=118357 GN=RHSIM_Rhsim09G0141100 PE=3 SV=1;tr|A0A6A4KU69|A0A6A4KU69_9ERIC Urate oxidase (Fragment) OS=Rhododendron williamsianum OX=262921 GN=C3L33_16843 PE=3 SV=1	22.0654	NaN	NaN	28.044	13.892
tr|A0A834G1J0|A0A834G1J0_RHOSS	tr|A0A834G1J0|A0A834G1J0_RHOSS 5-methyltetrahydropteroyltriglutamate--homocysteine S-methyltransferase OS=Rhododendron simsii OX=118357 GN=RHSIM_Rhsim13G0199800 PE=3 SV=1	NaN	NaN	23.2736	99.628	13.703
tr|A0A6A4LG53|A0A6A4LG53_9ERIC;tr|A0A834H4R1|A0A834H4R1_RHOSS	tr|A0A6A4LG53|A0A6A4LG53_9ERIC Phenylalanyl-tRNA synthetase (Fragment) OS=Rhododendron williamsianum OX=262921 GN=C3L33_11448 PE=3 SV=1;tr|A0A834H4R1|A0A834H4R1_RHOSS Phenylalanyl-tRNA synthetase OS=Rhododendron simsii OX=118357 GN=RHSIM_Rhsim04G0004400 PE	NaN	24.3825	23.7908	53.45	13.516
tr|A0A6A4KPQ4|A0A6A4KPQ4_9ERIC	tr|A0A6A4KPQ4|A0A6A4KPQ4_9ERIC Aminotran_1_2 domain-containing protein (Fragment) OS=Rhododendron williamsianum OX=262921 GN=C3L33_22702 PE=4 SV=1	NaN	26.2866	26.0188	13.427	12.947
tr|A0A834HIK2|A0A834HIK2_RHOSS;tr|A0A6A4MBV5|A0A6A4MBV5_9ERIC;tr|A0A834GJR9|A0A834GJR9_RHOSS;tr|A0A6A4LGF1|A0A6A4LGF1_9ERIC;tr|A0A6A4LZK9|A0A6A4LZK9_9ERIC;tr|A0A6A4LA57|A0A6A4LA57_9ERIC;tr|A0A834LRH7|A0A834LRH7_RHOSS;tr|A0A834L7U7|A0A834L7U7_RHOSS;tr|A0A834HGN0|A0A834HGN0_RHOSS;tr|A0A6A4KUS6|A0A6A4KUS6_9ERIC;tr|A0A6A4LYP2|A0A6A4LYP2_9ERIC;tr|A0A834LP59|A0A834LP59_RHOSS;tr|A0A6A4MCG9|A0A6A4MCG9_9E…	tr|A0A834HIK2|A0A834HIK2_RHOSS UDP-glucuronate decarboxylase OS=Rhododendron simsii OX=118357 GN=RHSIM_Rhsim03G0132500 PE=3 SV=1;tr|A0A6A4MBV5|A0A6A4MBV5_9ERIC UDP-glucuronate decarboxylase (Fragment) OS=Rhododendron williamsianum OX=262921 GN=C3L33_02719	NaN	NaN	24.986	42.719	12.455
tr|A0A834LY24|A0A834LY24_RHOSS;tr|A0A6A4M939|A0A6A4M939_9ERIC	tr|A0A834LY24|A0A834LY24_RHOSS Uncharacterized protein OS=Rhododendron simsii OX=118357 GN=RHSIM_Rhsim01G0263800 PE=3 SV=1;tr|A0A6A4M939|A0A6A4M939_9ERIC Uncharacterized protein (Fragment) OS=Rhododendron williamsianum OX=262921 GN=C3L33_04244 PE=3 SV=1	NaN	NaN	24.5687	51.585	12.259
tr|A0A6A4LW49|A0A6A4LW49_9ERIC;tr|A0A6A4KAR8|A0A6A4KAR8_9ERIC	tr|A0A6A4LW49|A0A6A4LW49_9ERIC SERPIN domain-containing protein (Fragment) OS=Rhododendron williamsianum OX=262921 GN=C3L33_09557 PE=3 SV=1;tr|A0A6A4KAR8|A0A6A4KAR8_9ERIC SERPIN domain-containing protein (Fragment) OS=Rhododendron williamsianum OX=262921 G	NaN	23.5356	23.6503	42.757	11.885
tr|A0A6A4KV25|A0A6A4KV25_9ERIC	tr|A0A6A4KV25|A0A6A4KV25_9ERIC ADH_N domain-containing protein (Fragment) OS=Rhododendron williamsianum OX=262921 GN=C3L33_20951 PE=4 SV=1	NaN	26.1535	25.5974	11.494	10.693
tr|A0A6A4L7J7|A0A6A4L7J7_9ERIC;tr|A0A834GLH4|A0A834GLH4_RHOSS	tr|A0A6A4L7J7|A0A6A4L7J7_9ERIC Uncharacterized protein (Fragment) OS=Rhododendron williamsianum OX=262921 GN=C3L33_16317 PE=3 SV=1;tr|A0A834GLH4|A0A834GLH4_RHOSS Uncharacterized protein OS=Rhododendron simsii OX=118357 GN=RHSIM_Rhsim09G0210100 PE=3 SV=1	NaN	NaN	25.4081	39.907	8.9404
tr|A0A6A4LFW3|A0A6A4LFW3_9ERIC;tr|A0A834L6G3|A0A834L6G3_RHOSS;tr|A0A834GJ89|A0A834GJ89_RHOSS	tr|A0A6A4LFW3|A0A6A4LFW3_9ERIC Serine/threonine-protein phosphatase 2A 55 kDa regulatory subunit B (Fragment) OS=Rhododendron williamsianum OX=262921 GN=C3L33_14683 PE=3 SV=1;tr|A0A834L6G3|A0A834L6G3_RHOSS Serine/threonine-protein phosphatase 2A 55 kDa reg	19.5811	NaN	NaN	38.628	8.6136
tr|Q5W4R9|Q5W4R9_ENKCH;tr|Q8SLU2|Q8SLU2_ENKCA;tr|Q9SCJ1|Q9SCJ1_ARCUU	tr|Q5W4R9|Q5W4R9_ENKCH ATP synthase subunit beta (Fragment) OS=Enkianthus chinensis OX=171226 GN=atpB PE=3 SV=1;tr|Q8SLU2|Q8SLU2_ENKCA ATP synthase subunit beta (Fragment) OS=Enkianthus campanulatus OX=13508 GN=atpB PE=3 SV=1	22.7803	NaN	24.1463	51.116	7.8072
tr|A0A834LSD4|A0A834LSD4_RHOSS;tr|A0A6A4LJP9|A0A6A4LJP9_9ERIC	tr|A0A834LSD4|A0A834LSD4_RHOSS D-fructose-1,6-bisphosphate 1-phosphohydrolase OS=Rhododendron simsii OX=118357 GN=RHSIM_Rhsim04G0164800 PE=3 SV=1;tr|A0A6A4LJP9|A0A6A4LJP9_9ERIC D-fructose-1,6-bisphosphate 1-phosphohydrolase (Fragment) OS=Rhododendron willi	24.7652	NaN	24.3413	46.32	6.831

## Sheet: Campania
		log₂ LFQ intenisty
Protein IDs	Fasta headers	CG	CV	CR	Mol. weight [kDa]	Score
tr|A0A6A4KS07|A0A6A4KS07_9ERIC;tr|A0A834LQY4|A0A834LQY4_RHOSS;tr|A0A834LMD9|A0A834LMD9_RHOSS	tr|A0A6A4KS07|A0A6A4KS07_9ERIC Adenosine kinase (Fragment) OS=Rhododendron williamsianum OX=262921 GN=C3L33_20155 PE=3 SV=1;tr|A0A834LQY4|A0A834LQY4_RHOSS Adenosine kinase OS=Rhododendron simsii OX=118357 GN=RHSIM_Rhsim05G0179500 PE=3 SV=1	26.9978	NaN	28.0671	41.72	323.31
tr|A0A834GED3|A0A834GED3_RHOSS;tr|A0A6A4KUM5|A0A6A4KUM5_9ERIC;tr|A0A834G2B8|A0A834G2B8_RHOSS;tr|A0A6A4L855|A0A6A4L855_9ERIC;tr|A0A834GJB5|A0A834GJB5_RHOSS	tr|A0A834GED3|A0A834GED3_RHOSS UDP-glucose 6-dehydrogenase OS=Rhododendron simsii OX=118357 GN=RHSIM_Rhsim10G0044100 PE=3 SV=1;tr|A0A6A4KUM5|A0A6A4KUM5_9ERIC UDP-glucose 6-dehydrogenase (Fragment) OS=Rhododendron williamsianum OX=262921 GN=C3L33_18764 PE=3	25.2896	25.9063	25.3442	53.026	323.31
tr|A0A834GAK6|A0A834GAK6_RHOSS;tr|A0A6A4KX31|A0A6A4KX31_9ERIC;tr|A0A6A4KSD0|A0A6A4KSD0_9ERIC;tr|A0A834HA53|A0A834HA53_RHOSS	tr|A0A834GAK6|A0A834GAK6_RHOSS PCI domain-containing protein OS=Rhododendron simsii OX=118357 GN=RHSIM_Rhsim11G0192900 PE=3 SV=1;tr|A0A6A4KX31|A0A6A4KX31_9ERIC PCI domain-containing protein (Fragment) OS=Rhododendron williamsianum OX=262921 GN=C3L33_20708	23.8196	23.7159	24.2075	57.04	323.31
tr|A0A6A4KXS2|A0A6A4KXS2_9ERIC;tr|A0A6A4MFG7|A0A6A4MFG7_9ERIC;tr|A0A834LWL8|A0A834LWL8_RHOSS;tr|A0A834GFN7|A0A834GFN7_RHOSS	tr|A0A6A4KXS2|A0A6A4KXS2_9ERIC Alpha-galactosidase (Fragment) OS=Rhododendron williamsianum OX=262921 GN=C3L33_20443 PE=3 SV=1	28.2537	28.7086	28.5905	37.215	323.31
tr|A0A6A4L4F0|A0A6A4L4F0_9ERIC;tr|A0A834LU30|A0A834LU30_RHOSS;tr|A0A2Z5U6P2|A0A2Z5U6P2_KALPR	tr|A0A6A4L4F0|A0A6A4L4F0_9ERIC Epimerase domain-containing protein (Fragment) OS=Rhododendron williamsianum OX=262921 GN=C3L33_15021 PE=4 SV=1;tr|A0A834LU30|A0A834LU30_RHOSS Epimerase domain-containing protein OS=Rhododendron simsii OX=118357 GN=RHSIM_Rhsi	26.3027	25.5076	27.3296	42.606	323.31
tr|A0A6A4L8V2|A0A6A4L8V2_9ERIC	tr|A0A6A4L8V2|A0A6A4L8V2_9ERIC Uncharacterized protein (Fragment) OS=Rhododendron williamsianum OX=262921 GN=C3L33_15860 PE=4 SV=1	28.2024	28.4163	28.2943	35.778	323.31
tr|A0A6A4L930|A0A6A4L930_9ERIC;tr|X5I326|X5I326_9ERIC;tr|Q8L6D2|Q8L6D2_RHOSS;tr|A0A2Z5QL08|A0A2Z5QL08_RHODA;tr|A0A834FUH5|A0A834FUH5_RHOSS;tr|A0A834FV40|A0A834FV40_RHOSS;tr|A0A4Y6JLW5|A0A4Y6JLW5_9ERIC;tr|A0A834LV68|A0A834LV68_RHOSS;tr|H6UKR4|H6UKR4_VACCO;tr|A0A4Y6JM43|A0A4Y6JM43_9ERIC;tr|A0A6A4KYP5|A0A6A4KYP5_9ERIC;tr|X5IG77|X5IG77_9ERIC;tr|A0A068PWE3|A0A068PWE3_CASLY;tr|A0A068PXK4|A0A068PXK4_9ER…	tr|A0A6A4L930|A0A6A4L930_9ERIC Uncharacterized protein (Fragment) OS=Rhododendron williamsianum OX=262921 GN=C3L33_15158 PE=3 SV=1;tr|X5I326|X5I326_9ERIC Chalcone synthase OS=Vaccinium ashei OX=945837 GN=CHS2 PE=2 SV=1;tr|Q8L6D2|Q8L6D2_RHOSS Chalcone synth	NaN	NaN	28.1831	44.751	323.31
tr|A0A6A4LBG3|A0A6A4LBG3_9ERIC;tr|A0A834G2F1|A0A834G2F1_RHOSS	tr|A0A6A4LBG3|A0A6A4LBG3_9ERIC Glyceraldehyde-3-phosphate dehydrogenase (Fragment) OS=Rhododendron williamsianum OX=262921 GN=C3L33_13280 PE=3 SV=1;tr|A0A834G2F1|A0A834G2F1_RHOSS Glyceraldehyde-3-phosphate dehydrogenase OS=Rhododendron simsii OX=118357 GN=	27.4749	26.8287	25.873	40.963	323.31
tr|A0A6A4LE63|A0A6A4LE63_9ERIC;tr|A0A834L389|A0A834L389_RHOSS;tr|A0A6A4LUX3|A0A6A4LUX3_9ERIC;tr|A0A6A4KK97|A0A6A4KK97_9ERIC;tr|A0A6A4LV75|A0A6A4LV75_9ERIC	tr|A0A6A4LE63|A0A6A4LE63_9ERIC Uncharacterized protein (Fragment) OS=Rhododendron williamsianum OX=262921 GN=C3L33_11578 PE=3 SV=1;tr|A0A834L389|A0A834L389_RHOSS Uncharacterized protein OS=Rhododendron simsii OX=118357 GN=RHSIM_RhsimUnG0250200 PE=3 SV=1	27.8908	27.3398	27.3157	112.5	323.31
tr|A0A834GRS0|A0A834GRS0_RHOSS;tr|A0A6A4LKS3|A0A6A4LKS3_9ERIC	tr|A0A834GRS0|A0A834GRS0_RHOSS Uncharacterized protein OS=Rhododendron simsii OX=118357 GN=RHSIM_Rhsim06G0162500 PE=3 SV=1;tr|A0A6A4LKS3|A0A6A4LKS3_9ERIC Uncharacterized protein (Fragment) OS=Rhododendron williamsianum OX=262921 GN=C3L33_10185 PE=3 SV=1	25.4625	25.3737	NaN	111.69	323.31
tr|A0A6A4LQC1|A0A6A4LQC1_9ERIC;tr|A0A6A4LR70|A0A6A4LR70_9ERIC;tr|A0A6A4L4Q2|A0A6A4L4Q2_9ERIC;tr|A0A6A4L1X2|A0A6A4L1X2_9ERIC;tr|A0A834GX81|A0A834GX81_RHOSS;tr|A0A834G9H8|A0A834G9H8_RHOSS;tr|A0A834GE04|A0A834GE04_RHOSS	tr|A0A6A4LQC1|A0A6A4LQC1_9ERIC Catalase (Fragment) OS=Rhododendron williamsianum OX=262921 GN=C3L33_09406 PE=3 SV=1;tr|A0A6A4LR70|A0A6A4LR70_9ERIC Catalase (Fragment) OS=Rhododendron williamsianum OX=262921 GN=C3L33_11250 PE=3 SV=1;tr|A0A6A4L4Q2|A0A6A4L4Q2	25.3632	NaN	26.4395	53.439	323.31
tr|A0A6A4LQJ5|A0A6A4LQJ5_9ERIC;tr|A0A834GWU3|A0A834GWU3_RHOSS	tr|A0A6A4LQJ5|A0A6A4LQJ5_9ERIC Tr-type G domain-containing protein (Fragment) OS=Rhododendron williamsianum OX=262921 GN=C3L33_09667 PE=3 SV=1;tr|A0A834GWU3|A0A834GWU3_RHOSS Uncharacterized protein OS=Rhododendron simsii OX=118357 GN=RHSIM_Rhsim06G0239600	27.9383	27.792	27.8631	93.654	323.31
tr|A0A6A4M0Y7|A0A6A4M0Y7_9ERIC	tr|A0A6A4M0Y7|A0A6A4M0Y7_9ERIC Lipoxygenase (Fragment) OS=Rhododendron williamsianum OX=262921 GN=C3L33_05810 PE=3 SV=1	27.8984	26.445	25.3158	58.014	323.31
tr|A0A6A4M2P9|A0A6A4M2P9_9ERIC;tr|A0A834G4H8|A0A834G4H8_RHOSS;tr|A0A6A4LG01|A0A6A4LG01_9ERIC;tr|A0A834LSW9|A0A834LSW9_RHOSS;tr|A0A834FUP7|A0A834FUP7_RHOSS	tr|A0A6A4M2P9|A0A6A4M2P9_9ERIC 40S ribosomal protein S8 (Fragment) OS=Rhododendron williamsianum OX=262921 GN=C3L33_07250 PE=3 SV=1;tr|A0A834G4H8|A0A834G4H8_RHOSS 40S ribosomal protein S8 OS=Rhododendron simsii OX=118357 GN=RHSIM_Rhsim13G0050700 PE=3 SV=1	25.5512	26.3099	25.8556	30.75	323.31
tr|A0A6A4M3B6|A0A6A4M3B6_9ERIC;tr|A0A834G455|A0A834G455_RHOSS;tr|A0A834LIA3|A0A834LIA3_RHOSS;tr|A0A6A4MCH3|A0A6A4MCH3_9ERIC	tr|A0A6A4M3B6|A0A6A4M3B6_9ERIC Uncharacterized protein (Fragment) OS=Rhododendron williamsianum OX=262921 GN=C3L33_06831 PE=4 SV=1;tr|A0A834G455|A0A834G455_RHOSS Uncharacterized protein OS=Rhododendron simsii OX=118357 GN=RHSIM_Rhsim13G0098600 PE=4 SV=1	26.9872	26.257	26.7457	99.392	323.31
tr|A0A6A4M8Z6|A0A6A4M8Z6_9ERIC;tr|A0A834HJ59|A0A834HJ59_RHOSS	tr|A0A6A4M8Z6|A0A6A4M8Z6_9ERIC Alba domain-containing protein (Fragment) OS=Rhododendron williamsianum OX=262921 GN=C3L33_04306 PE=4 SV=1;tr|A0A834HJ59|A0A834HJ59_RHOSS Alba domain-containing protein OS=Rhododendron simsii OX=118357 GN=RHSIM_Rhsim01G025750	NaN	NaN	24.1347	36.928	323.31
tr|A0A6A4M9R1|A0A6A4M9R1_9ERIC	tr|A0A6A4M9R1|A0A6A4M9R1_9ERIC Sucrose synthase (Fragment) OS=Rhododendron williamsianum OX=262921 GN=C3L33_04010 PE=3 SV=1	28.1829	27.7328	27.7415	93.034	323.31
tr|D6MMT2|D6MMT2_9ERIC;tr|A0A834G033|A0A834G033_RHOSS;tr|A0A1P8NPT1|A0A1P8NPT1_9ERIC;tr|A0A834LYD5|A0A834LYD5_RHOSS;tr|A0A834HM85|A0A834HM85_RHOSS;tr|A0A834FZ60|A0A834FZ60_RHOSS;tr|A0A834LSH9|A0A834LSH9_RHOSS;tr|A0A834LUC6|A0A834LUC6_RHOSS;tr|A0A834L4L3|A0A834L4L3_RHOSS;tr|A0A834FTW0|A0A834FTW0_RHOSS;tr|A0A834FX39|A0A834FX39_RHOSS;tr|A0A834G050|A0A834G050_RHOSS;tr|A0A834L6H5|A0A834L6H5_RHOSS;tr|A…	tr|D6MMT2|D6MMT2_9ERIC Heat shock protein 70 OS=Rhododendron calophytum OX=479660 PE=2 SV=1;tr|A0A834G033|A0A834G033_RHOSS Uncharacterized protein OS=Rhododendron simsii OX=118357 GN=RHSIM_Rhsim13G0084100 PE=3 SV=1;tr|A0A1P8NPT1|A0A1P8NPT1_9ERIC Heat shock	29.6129	29.741	29.2854	71.192	323.31
tr|A0A834G647|A0A834G647_RHOSS;tr|A0A6A4KWZ7|A0A6A4KWZ7_9ERIC	tr|A0A834G647|A0A834G647_RHOSS Protein kinase domain-containing protein OS=Rhododendron simsii OX=118357 GN=RHSIM_Rhsim11G0176000 PE=3 SV=1;tr|A0A6A4KWZ7|A0A6A4KWZ7_9ERIC Uncharacterized protein (Fragment) OS=Rhododendron williamsianum OX=262921 GN=C3L33_2	27.9508	27.9062	27.4488	151.83	323.31
tr|X5I323|X5I323_9ERIC;tr|A0A834GAI3|A0A834GAI3_RHOSS;tr|A0A6A4KQ81|A0A6A4KQ81_9ERIC;tr|A0A834LDN6|A0A834LDN6_RHOSS;tr|A0A6A4KVY8|A0A6A4KVY8_9ERIC;tr|F8WQK9|F8WQK9_9ERIC	tr|X5I323|X5I323_9ERIC Action OS=Vaccinium ashei OX=945837 GN=ACT PE=2 SV=1;tr|A0A834GAI3|A0A834GAI3_RHOSS Uncharacterized protein OS=Rhododendron simsii OX=118357 GN=RHSIM_Rhsim10G0141300 PE=3 SV=1;tr|A0A6A4KQ81|A0A6A4KQ81_9ERIC Uncharacterized protein (F	29.1442	29.6352	30.4663	41.695	323.31
tr|A0A834GBJ7|A0A834GBJ7_RHOSS	tr|A0A834GBJ7|A0A834GBJ7_RHOSS Glutamine synthetase OS=Rhododendron simsii OX=118357 GN=RHSIM_Rhsim10G0178400 PE=3 SV=1	28.5283	28.8882	28.7805	39.2	323.31
tr|A0A834GGW3|A0A834GGW3_RHOSS;tr|A0A6A4KZN0|A0A6A4KZN0_9ERIC;tr|A0A834GEG2|A0A834GEG2_RHOSS	tr|A0A834GGW3|A0A834GGW3_RHOSS ATP synthase subunit beta OS=Rhododendron simsii OX=118357 GN=RHSIM_Rhsim09G0069100 PE=3 SV=1;tr|A0A6A4KZN0|A0A6A4KZN0_9ERIC H(+)-transporting two-sector ATPase (Fragment) OS=Rhododendron williamsianum OX=262921 GN=C3L33_1713	26.7967	25.8186	27.6219	64.811	323.31
tr|A0A834GJK7|A0A834GJK7_RHOSS	tr|A0A834GJK7|A0A834GJK7_RHOSS Phospholipase D OS=Rhododendron simsii OX=118357 GN=RHSIM_Rhsim08G0214000 PE=3 SV=1	25.9659	26.7396	27.2159	92.13	323.31
tr|A0A834GKB3|A0A834GKB3_RHOSS;tr|A0A6A4MF27|A0A6A4MF27_9ERIC	tr|A0A834GKB3|A0A834GKB3_RHOSS V-ATPase 69 kDa subunit OS=Rhododendron simsii OX=118357 GN=RHSIM_Rhsim08G0250100 PE=3 SV=1;tr|A0A6A4MF27|A0A6A4MF27_9ERIC V-ATPase 69 kDa subunit (Fragment) OS=Rhododendron williamsianum OX=262921 GN=C3L33_00028 PE=3 SV=1	26.2545	27.198	27.131	68.9	323.31
tr|A0A834GM81|A0A834GM81_RHOSS;tr|A0A6A4MQ87|A0A6A4MQ87_9ERIC;tr|A0A834HBC0|A0A834HBC0_RHOSS	tr|A0A834GM81|A0A834GM81_RHOSS Coatomer subunit beta OS=Rhododendron simsii OX=118357 GN=RHSIM_Rhsim08G0248400 PE=4 SV=1;tr|A0A6A4MQ87|A0A6A4MQ87_9ERIC Uncharacterized protein (Fragment) OS=Rhododendron williamsianum OX=262921 GN=C3L33_00043 PE=4 SV=1	27.5766	27.9933	27.6101	105.79	323.31
tr|A0A834GRA6|A0A834GRA6_RHOSS	tr|A0A834GRA6|A0A834GRA6_RHOSS Pectin acetylesterase OS=Rhododendron simsii OX=118357 GN=RHSIM_Rhsim07G0141400 PE=3 SV=1	24.4159	25.23	24.5964	54.141	323.31
tr|A0A834GY77|A0A834GY77_RHOSS;tr|A0A6A4LY78|A0A6A4LY78_9ERIC	tr|A0A834GY77|A0A834GY77_RHOSS Aminotran_1_2 domain-containing protein OS=Rhododendron simsii OX=118357 GN=RHSIM_Rhsim07G0102700 PE=3 SV=1;tr|A0A6A4LY78|A0A6A4LY78_9ERIC Aminotran_1_2 domain-containing protein (Fragment) OS=Rhododendron williamsianum OX=26	27.0196	27.4854	NaN	87.382	323.31
tr|A0A834H2L4|A0A834H2L4_RHOSS	tr|A0A834H2L4|A0A834H2L4_RHOSS ATP citrate synthase OS=Rhododendron simsii OX=118357 GN=RHSIM_Rhsim04G0239000 PE=4 SV=1	26.5054	25.8912	25.8438	63.913	323.31
tr|A0A834LFK9|A0A834LFK9_RHOSS;tr|A0A6A4KVG6|A0A6A4KVG6_9ERIC;tr|A0A834L2F9|A0A834L2F9_RHOSS	tr|A0A834LFK9|A0A834LFK9_RHOSS Clathrin heavy chain OS=Rhododendron simsii OX=118357 GN=RHSIM_Rhsim09G0178400 PE=3 SV=1	28.5792	29.4648	29.3063	193.03	323.31
tr|A0A834LFU7|A0A834LFU7_RHOSS;tr|A0A6A4MJ90|A0A6A4MJ90_9ERIC	tr|A0A834LFU7|A0A834LFU7_RHOSS Elongation factor Tu OS=Rhododendron simsii OX=118357 GN=RHSIM_Rhsim08G0178200 PE=3 SV=1;tr|A0A6A4MJ90|A0A6A4MJ90_9ERIC Uncharacterized protein (Fragment) OS=Rhododendron williamsianum OX=262921 GN=C3L33_00628 PE=3 SV=1	26.5769	24.8334	26.048	50.049	323.31
tr|A0A834LPM3|A0A834LPM3_RHOSS	tr|A0A834LPM3|A0A834LPM3_RHOSS Oxoglutarate dehydrogenase (succinyl-transferring) OS=Rhododendron simsii OX=118357 GN=RHSIM_Rhsim03G0127100 PE=3 SV=1	26.4069	26.0208	27.013	149.11	323.31
tr|A0A834LTJ3|A0A834LTJ3_RHOSS;tr|A0A6A4M6F4|A0A6A4M6F4_9ERIC	tr|A0A834LTJ3|A0A834LTJ3_RHOSS Phosphopyruvate hydratase OS=Rhododendron simsii OX=118357 GN=RHSIM_Rhsim03G0171300 PE=3 SV=1;tr|A0A6A4M6F4|A0A6A4M6F4_9ERIC Phosphopyruvate hydratase (Fragment) OS=Rhododendron williamsianum OX=262921 GN=C3L33_03123 PE=3 SV=	28.0489	27.4928	27.5314	45.741	323.31
tr|A0A834LTN6|A0A834LTN6_RHOSS	tr|A0A834LTN6|A0A834LTN6_RHOSS 5-methyltetrahydropteroyltriglutamate--homocysteine S-methyltransferase OS=Rhododendron simsii OX=118357 GN=RHSIM_Rhsim03G0053000 PE=3 SV=1	29.0274	29.6273	29.1065	89.368	323.31
tr|A0A834LV15|A0A834LV15_RHOSS;tr|A0A6A4KXR9|A0A6A4KXR9_9ERIC	tr|A0A834LV15|A0A834LV15_RHOSS Aspartate aminotransferase OS=Rhododendron simsii OX=118357 GN=RHSIM_Rhsim02G0181400 PE=3 SV=1;tr|A0A6A4KXR9|A0A6A4KXR9_9ERIC Aspartate aminotransferase (Fragment) OS=Rhododendron williamsianum OX=262921 GN=C3L33_15804 PE=3 S	28.8913	29.5719	29.0355	51.486	323.31
tr|A0A834LWF2|A0A834LWF2_RHOSS;tr|A0A6A4L5M7|A0A6A4L5M7_9ERIC;tr|A0A834LHR4|A0A834LHR4_RHOSS;tr|A0A6A4LUU4|A0A6A4LUU4_9ERIC	tr|A0A834LWF2|A0A834LWF2_RHOSS Protein transport protein SEC23 OS=Rhododendron simsii OX=118357 GN=RHSIM_Rhsim02G0069600 PE=3 SV=1;tr|A0A6A4L5M7|A0A6A4L5M7_9ERIC Protein transport protein SEC23 (Fragment) OS=Rhododendron williamsianum OX=262921 GN=C3L33_15	24.1534	24.739	NaN	88.781	323.31
tr|Q31779|Q31779_ARBCA;tr|U3G063|U3G063_ARBUN;tr|A0A0A7NX68|A0A0A7NX68_ARBUN;tr|A0A0F7EWA3|A0A0F7EWA3_ARCAL;tr|A0A6F8SNM0|A0A6F8SNM0_9ERIC;tr|A0A0F7G516|A0A0F7G516_9ERIC;tr|Q71N68|Q71N68_RHOGE;sp|P28447|RBL_RHOHI;tr|Q37157|Q37157_ARDCR;tr|Q8SLM1|Q8SLM1_EM	tr|Q31779|Q31779_ARBCA Ribulose bisphosphate carboxylase large chain (Fragment) OS=Arbutus canariensis OX=13343 GN=rbcL PE=3 SV=2;tr|U3G063|U3G063_ARBUN Ribulose bisphosphate carboxylase large chain OS=Arbutus unedo OX=84005 GN=rbcL PE=3 SV=1;tr|A0A0A7NX68	30.4231	29.0323	29.0673	51.63	323.31
tr|V9PBV0|V9PBV0_VACMA;tr|B0FA00|B0FA00_9ERIC;tr|A0A7M1LC10|A0A7M1LC10_RHOSS;tr|A0A834FY43|A0A834FY43_RHOSS;tr|Q8SIC5|Q8SIC5_9ERIC;tr|E5LEZ4|E5LEZ4_9ERIC;tr|E5LEY5|E5LEY5_9ERIC;tr|I1ZHA6|I1ZHA6_9ERIC;tr|E5DK37|E5DK37_ARBCA;tr|Q8SIG1|Q8SIG1_CHIUM;tr|Q3ZMK4|Q3ZMK4_RHOIM;tr|Q8SIF3|Q8SIF3_EMPNI;tr|Q8SIF2|Q8SIF2_ENKCA;tr|A0A834FX42|A0A834FX42_RHOSS;tr|A0A834GQW4|A0A834GQW4_RHOSS;tr|A0A834HDE9|A0A834HD…	tr|V9PBV0|V9PBV0_VACMA ATP synthase subunit alpha OS=Vaccinium macrocarpon OX=13750 GN=atp1 PE=3 SV=1;tr|B0FA00|B0FA00_9ERIC ATP synthase subunit alpha (Fragment) OS=Vaccinium arboreum OX=229201 GN=atp1 PE=3 SV=1;tr|A0A7M1LC10|A0A7M1LC10_RHOSS ATP synthase	27.6085	28.7838	28.5792	55.47	323.31
tr|A0A834G7U1|A0A834G7U1_RHOSS;tr|A0A834GBK9|A0A834GBK9_RHOSS;tr|A0A834GB13|A0A834GB13_RHOSS;tr|A0A834G6Q5|A0A834G6Q5_RHOSS;tr|A0A6A4KQ06|A0A6A4KQ06_9ERIC;tr|A0A6A4KU14|A0A6A4KU14_9ERIC;tr|A0A834L8A4|A0A834L8A4_RHOSS;tr|A0A834G3D1|A0A834G3D1_RHOSS;tr|A0A834GG45|A0A834GG45_RHOSS;tr|A0A6A4KSQ7|A0A6A4KSQ7_9ERIC;tr|A0A6A4L7B3|A0A6A4L7B3_9ERIC;tr|A0A6A4KMD0|A0A6A4KMD0_9ERIC;tr|A0A6A4KXJ2|A0A6A4KXJ2_9E…	tr|A0A834G7U1|A0A834G7U1_RHOSS Uncharacterized protein OS=Rhododendron simsii OX=118357 GN=RHSIM_Rhsim11G0041300 PE=3 SV=1;tr|A0A834GBK9|A0A834GBK9_RHOSS Uncharacterized protein OS=Rhododendron simsii OX=118357 GN=RHSIM_Rhsim08G0179700 PE=3 SV=1;tr|A0A834G	28.5511	28.7655	28.5382	46.741	313.57
tr|A0A834LLS5|A0A834LLS5_RHOSS;tr|A0A834GRJ6|A0A834GRJ6_RHOSS;tr|A0A834LIQ2|A0A834LIQ2_RHOSS;tr|A0A6A4LQW0|A0A6A4LQW0_9ERIC;tr|A0A6A4LFF1|A0A6A4LFF1_9ERIC;tr|A0A6A4M114|A0A6A4M114_9ERIC	tr|A0A834LLS5|A0A834LLS5_RHOSS Aspartate--tRNA ligase OS=Rhododendron simsii OX=118357 GN=RHSIM_Rhsim07G0113300 PE=3 SV=1;tr|A0A834GRJ6|A0A834GRJ6_RHOSS Aspartate--tRNA ligase OS=Rhododendron simsii OX=118357 GN=RHSIM_Rhsim07G0113700 PE=3 SV=1;tr|A0A834LIQ	25.9963	NaN	NaN	59.944	308.49
tr|V9PBK9|V9PBK9_VACMA;tr|A0A7M1LDS3|A0A7M1LDS3_RHOSS;tr|A0A834G042|A0A834G042_RHOSS	tr|V9PBK9|V9PBK9_VACMA NADH dehydrogenase subunit 7 OS=Vaccinium macrocarpon OX=13750 GN=nad7 PE=3 SV=1;tr|A0A7M1LDS3|A0A7M1LDS3_RHOSS NADH dehydrogenase subunit 7 OS=Rhododendron simsii OX=118357 GN=nad7 PE=3 SV=1;tr|A0A834G042|A0A834G042_RHOSS Complex1_4	26.6182	27.0086	26.3775	44.385	299.99
tr|U3G044|U3G044_ARBUN;tr|A0A6H1U989|A0A6H1U989_9ERIC;tr|D3WCQ6|D3WCQ6_RHOSS;tr|A0A1B0ZEW4|A0A1B0ZEW4_9ERIC;tr|A0A1B1CZM3|A0A1B1CZM3_9ERIC;tr|A0A8F5CDG6|A0A8F5CDG6_9ERIC;tr|A0A8F5CD03|A0A8F5CD03_9ERIC;tr|A0A8F5CCW9|A0A8F5CCW9_9ERIC;tr|A0A8F3ELJ4|A0A8F3ELJ4_RHOML;tr|A0A8E5N7Q9|A0A8E5N7Q9_9ERIC;tr|A0A898CTL6|A0A898CTL6_9ERIC;tr|A0A7M1ICH1|A0A7M1ICH1_9ERIC;tr|A0A7D5JLC7|A0A7D5JLC7_9ERIC;tr|A0A6B9JDH…	tr|U3G044|U3G044_ARBUN ATP synthase subunit alpha, chloroplastic OS=Arbutus unedo OX=84005 GN=atpA PE=3 SV=1;tr|A0A6H1U989|A0A6H1U989_9ERIC ATP synthase subunit alpha, chloroplastic OS=Rhododendron delavayi var. delavayi OX=1495201 GN=atpA PE=3 SV=1;tr|D3W	27.4239	27.5676	26.9588	55.262	296.33
tr|A0A6A4KZB6|A0A6A4KZB6_9ERIC;tr|A0A834GCT9|A0A834GCT9_RHOSS	tr|A0A6A4KZB6|A0A6A4KZB6_9ERIC UDP-arabinopyranose mutase (Fragment) OS=Rhododendron williamsianum OX=262921 GN=C3L33_18723 PE=3 SV=1;tr|A0A834GCT9|A0A834GCT9_RHOSS UDP-arabinopyranose mutase OS=Rhododendron simsii OX=118357 GN=RHSIM_Rhsim10G0056100 PE=3 S	NaN	NaN	24.9993	41.64	293.01
tr|A0A834G9N6|A0A834G9N6_RHOSS;tr|A0A6A4LCV3|A0A6A4LCV3_9ERIC;tr|A0A834G743|A0A834G743_RHOSS	tr|A0A834G9N6|A0A834G9N6_RHOSS UDP-arabinopyranose mutase OS=Rhododendron simsii OX=118357 GN=RHSIM_Rhsim12G0149600 PE=3 SV=1;tr|A0A6A4LCV3|A0A6A4LCV3_9ERIC UDP-arabinopyranose mutase (Fragment) OS=Rhododendron williamsianum OX=262921 GN=C3L33_14210 PE=3 S	28.8817	28.5945	29.2965	40.87	287.48
tr|A0A834HIX9|A0A834HIX9_RHOSS;tr|A0A6A4LAU6|A0A6A4LAU6_9ERIC;tr|I1U4K8|I1U4K8_9ERIC;tr|A0A6A4LH25|A0A6A4LH25_9ERIC;tr|A0A6A4KIP4|A0A6A4KIP4_9ERIC;tr|A0A834GTK1|A0A834GTK1_RHOSS	tr|A0A834HIX9|A0A834HIX9_RHOSS Malate dehydrogenase OS=Rhododendron simsii OX=118357 GN=RHSIM_Rhsim02G0037400 PE=3 SV=1;tr|A0A6A4LAU6|A0A6A4LAU6_9ERIC Malate dehydrogenase (Fragment) OS=Rhododendron williamsianum OX=262921 GN=C3L33_15068 PE=3 SV=1;tr|I1U4K	24.9527	NaN	24.8149	88.91	286.22
tr|A0A6A4LR12|A0A6A4LR12_9ERIC	tr|A0A6A4LR12|A0A6A4LR12_9ERIC Uncharacterized protein (Fragment) OS=Rhododendron williamsianum OX=262921 GN=C3L33_10269 PE=3 SV=1	26.5823	26.2715	25.3304	42.558	286.02
tr|A0A834LV39|A0A834LV39_RHOSS;tr|A0A6A4LBI2|A0A6A4LBI2_9ERIC;tr|A0A834LX87|A0A834LX87_RHOSS;tr|A0A6A4L9G2|A0A6A4L9G2_9ERIC;tr|G3BG93|G3BG93_9ERIC;tr|L8AXE9|L8AXE9_PHYNP;tr|G3BG84|G3BG84_9ERIC;tr|K4EJU6|K4EJU6_RHOSB;tr|K4EJS6|K4EJS6_9ERIC;tr|K4EJI2|K4EJI2_9ERIC;tr|G3BG99|G3BG99_9ERIC;tr|G3BG98|G3BG98_9ERIC;tr|G3BG97|G3BG97_9ERIC;tr|G3BG91|G3BG91_9ERIC;tr|G3BG95|G3BG95_9ERIC;tr|G3BG83|G3BG83_9ERIC…	tr|A0A834LV39|A0A834LV39_RHOSS 40S ribosomal protein SA OS=Rhododendron simsii OX=118357 GN=RHSIM_Rhsim02G0252600 PE=3 SV=1;tr|A0A6A4LBI2|A0A6A4LBI2_9ERIC Uncharacterized protein (Fragment) OS=Rhododendron williamsianum OX=262921 GN=C3L33_16195 PE=3 SV=1;t	28.5539	28.1544	28.5995	46.922	285.55
tr|A0A6A4KNX2|A0A6A4KNX2_9ERIC	tr|A0A6A4KNX2|A0A6A4KNX2_9ERIC Alpha-1,4 glucan phosphorylase (Fragment) OS=Rhododendron williamsianum OX=262921 GN=C3L33_18765 PE=3 SV=1	26.6867	26.1914	25.3449	106.8	280.14
tr|A0A834GTU4|A0A834GTU4_RHOSS;tr|A0A834LS08|A0A834LS08_RHOSS;tr|A0A6A4LBE0|A0A6A4LBE0_9ERIC;tr|A0A6A4L911|A0A6A4L911_9ERIC	tr|A0A834GTU4|A0A834GTU4_RHOSS Uncharacterized protein OS=Rhododendron simsii OX=118357 GN=RHSIM_Rhsim07G0079900 PE=3 SV=1;tr|A0A834LS08|A0A834LS08_RHOSS Uncharacterized protein OS=Rhododendron simsii OX=118357 GN=RHSIM_Rhsim02G0248700 PE=4 SV=1;tr|A0A6A4L	24.1425	NaN	NaN	73.612	277
tr|A0A6A4KY05|A0A6A4KY05_9ERIC;tr|A0A834GEG5|A0A834GEG5_RHOSS;tr|A0A834GI20|A0A834GI20_RHOSS;tr|A0A292GD22|A0A292GD22_PHYNP;tr|A0A292GC44|A0A292GC44_9ERIC;tr|A0A292GBA0|A0A292GBA0_PHYEM;tr|A0A292GB63|A0A292GB63_9ERIC;tr|A0A292G606|A0A292G606_9ERIC;tr|A0A292G4P3|A0A292G4P3_PHYCU;tr|A0A2Z5VG13|A0A2Z5VG13_9ERIC;tr|A0A292GBA9|A0A292GBA9_9ERIC;tr|A0A2Z5VFQ2|A0A2Z5VFQ2_9ERIC	tr|A0A6A4KY05|A0A6A4KY05_9ERIC Iso_dh domain-containing protein (Fragment) OS=Rhododendron williamsianum OX=262921 GN=C3L33_17956 PE=3 SV=1;tr|A0A834GEG5|A0A834GEG5_RHOSS Isocitrate dehydrogenase [NADP] OS=Rhododendron simsii OX=118357 GN=RHSIM_Rhsim10G018	28.6803	27.1656	28.3371	45.271	270.29
tr|A0A6A4L1L1|A0A6A4L1L1_9ERIC;tr|A0A834L5K6|A0A834L5K6_RHOSS	tr|A0A6A4L1L1|A0A6A4L1L1_9ERIC Diadenosine tetraphosphate synthetase (Fragment) OS=Rhododendron williamsianum OX=262921 GN=C3L33_14504 PE=3 SV=1;tr|A0A834L5K6|A0A834L5K6_RHOSS Diadenosine tetraphosphate synthetase OS=Rhododendron simsii OX=118357 GN=RHSIM_	27.1594	26.9326	25.9766	67.065	268.7
tr|A0A834GBR1|A0A834GBR1_RHOSS	tr|A0A834GBR1|A0A834GBR1_RHOSS Iso_dh domain-containing protein OS=Rhododendron simsii OX=118357 GN=RHSIM_Rhsim10G0199600 PE=3 SV=1	26.9772	26.5329	27.353	36.892	268.56
tr|A0A834HBZ4|A0A834HBZ4_RHOSS;tr|A0A6A4L412|A0A6A4L412_9ERIC;tr|A0A834GHF5|A0A834GHF5_RHOSS;tr|A0A834LG53|A0A834LG53_RHOSS	tr|A0A834HBZ4|A0A834HBZ4_RHOSS Adenosylhomocysteinase OS=Rhododendron simsii OX=118357 GN=RHSIM_Rhsim02G0062100 PE=3 SV=1;tr|A0A6A4L412|A0A6A4L412_9ERIC Adenosylhomocysteinase (Fragment) OS=Rhododendron williamsianum OX=262921 GN=C3L33_15205 PE=3 SV=1	28.0952	28.419	27.4838	53.219	265.85
tr|U3G064|U3G064_ARBUN;tr|Q9M4Q3|Q9M4Q3_ARBUN;tr|A0A8F5CCN1|A0A8F5CCN1_9ERIC;tr|A0A7M1ICN3|A0A7M1ICN3_9ERIC;tr|A0A6B9JJC9|A0A6B9JJC9_9ERIC;tr|A0A6H1U801|A0A6H1U801_9ERIC;tr|A0A7D5FGS8|A0A7D5FGS8_9ERIC;tr|Q8SLS3|Q8SLS3_9ERIC;tr|A0A4D6PZL8|A0A4D6PZL8_9ERIC;tr|A0A1X9PJ48|A0A1X9PJ48_9ERIC;tr|A0A1X9PLR4|A0A1X9PLR4_9ERIC;tr|A0A1X9PMB3|A0A1X9PMB3_9ERIC;tr|A0A1X9PPP1|A0A1X9PPP1_9ERIC;tr|A0A8F5H4S9|A0A8F5…	tr|U3G064|U3G064_ARBUN ATP synthase subunit beta, chloroplastic OS=Arbutus unedo OX=84005 GN=atpB PE=3 SV=1;tr|Q9M4Q3|Q9M4Q3_ARBUN ATP synthase subunit beta (Fragment) OS=Arbutus unedo OX=84005 GN=atpB PE=3 SV=1;tr|A0A8F5CCN1|A0A8F5CCN1_9ERIC ATP synthase	25.4198	25.8139	26.3769	53.931	262.15
tr|A0A6A4LFI6|A0A6A4LFI6_9ERIC;tr|A0A834H1K7|A0A834H1K7_RHOSS	tr|A0A6A4LFI6|A0A6A4LFI6_9ERIC Phosphoenolpyruvate carboxylase (Fragment) OS=Rhododendron williamsianum OX=262921 GN=C3L33_11733 PE=3 SV=1;tr|A0A834H1K7|A0A834H1K7_RHOSS Phosphoenolpyruvate carboxylase OS=Rhododendron simsii OX=118357 GN=RHSIM_Rhsim04G0026	28.074	27.563	27.45	109.92	254.55
tr|A0A6A4KXU7|A0A6A4KXU7_9ERIC	tr|A0A6A4KXU7|A0A6A4KXU7_9ERIC Sucrose synthase (Fragment) OS=Rhododendron williamsianum OX=262921 GN=C3L33_19213 PE=3 SV=1	28.6127	28.4542	29.2197	90.277	245.07
tr|A0A834LFI5|A0A834LFI5_RHOSS;tr|A0A6A4LNY6|A0A6A4LNY6_9ERIC	tr|A0A834LFI5|A0A834LFI5_RHOSS Uncharacterized protein OS=Rhododendron simsii OX=118357 GN=RHSIM_Rhsim07G0088700 PE=3 SV=1;tr|A0A6A4LNY6|A0A6A4LNY6_9ERIC Uncharacterized protein (Fragment) OS=Rhododendron williamsianum OX=262921 GN=C3L33_08538 PE=3 SV=1	26.7757	26.4825	26.4414	103.06	240.94
tr|A0A834L8E9|A0A834L8E9_RHOSS;tr|A0A834G503|A0A834G503_RHOSS;tr|A0A834L8K7|A0A834L8K7_RHOSS;tr|A0A834G5X4|A0A834G5X4_RHOSS;tr|A0A834G555|A0A834G555_RHOSS;tr|A0A6A4LAH3|A0A6A4LAH3_9ERIC	tr|A0A834L8E9|A0A834L8E9_RHOSS Uncharacterized protein OS=Rhododendron simsii OX=118357 GN=RHSIM_Rhsim12G0197900 PE=4 SV=1;tr|A0A834G503|A0A834G503_RHOSS OVATE domain-containing protein OS=Rhododendron simsii OX=118357 GN=RHSIM_Rhsim12G0198100 PE=4 SV=1;tr	27.3821	26.7914	26.8357	93.614	238.68
tr|A0A6A4M5S9|A0A6A4M5S9_9ERIC;tr|A0A6A4M0Q2|A0A6A4M0Q2_9ERIC	tr|A0A6A4M5S9|A0A6A4M5S9_9ERIC Phosphopyruvate hydratase (Fragment) OS=Rhododendron williamsianum OX=262921 GN=C3L33_02557 PE=3 SV=1	28.0482	27.8757	27.6181	45.467	237.86
tr|A0A6A4LBC2|A0A6A4LBC2_9ERIC	tr|A0A6A4LBC2|A0A6A4LBC2_9ERIC Uncharacterized protein (Fragment) OS=Rhododendron williamsianum OX=262921 GN=C3L33_10243 PE=3 SV=1	23.1866	23.2284	NaN	102.15	232.55
tr|A0A834GB46|A0A834GB46_RHOSS;tr|A0A6A4L043|A0A6A4L043_9ERIC;tr|A0A834GI74|A0A834GI74_RHOSS;tr|A0A834LA04|A0A834LA04_RHOSS	tr|A0A834GB46|A0A834GB46_RHOSS Uncharacterized protein OS=Rhododendron simsii OX=118357 GN=RHSIM_Rhsim10G0014200 PE=3 SV=1;tr|A0A6A4L043|A0A6A4L043_9ERIC Uncharacterized protein (Fragment) OS=Rhododendron williamsianum OX=262921 GN=C3L33_19046 PE=3 SV=1;tr	26.0581	23.3281	24.4903	85.44	228.93
tr|A0A6A4KRH6|A0A6A4KRH6_9ERIC;tr|A0A834H687|A0A834H687_RHOSS;tr|A0A834G8X3|A0A834G8X3_RHOSS;tr|A0A834G878|A0A834G878_RHOSS;tr|A0A6A4KK79|A0A6A4KK79_9ERIC	tr|A0A6A4KRH6|A0A6A4KRH6_9ERIC Uncharacterized protein (Fragment) OS=Rhododendron williamsianum OX=262921 GN=C3L33_19787 PE=3 SV=1;tr|A0A834H687|A0A834H687_RHOSS Uncharacterized protein OS=Rhododendron simsii OX=118357 GN=RHSIM_Rhsim05G0113400 PE=3 SV=1	26.0413	NaN	NaN	61.575	220.28
tr|A0A834GLA1|A0A834GLA1_RHOSS	tr|A0A834GLA1|A0A834GLA1_RHOSS Ribonuclease OS=Rhododendron simsii OX=118357 GN=RHSIM_Rhsim08G0199800 PE=4 SV=1	26.308	26.0881	26.2216	109.99	219.65
tr|A0A834HIW7|A0A834HIW7_RHOSS;tr|A0A6A4M3J8|A0A6A4M3J8_9ERIC	tr|A0A834HIW7|A0A834HIW7_RHOSS Aha1_N domain-containing protein OS=Rhododendron simsii OX=118357 GN=RHSIM_Rhsim03G0004900 PE=3 SV=1;tr|A0A6A4M3J8|A0A6A4M3J8_9ERIC Aha1_N domain-containing protein (Fragment) OS=Rhododendron williamsianum OX=262921 GN=C3L33_	25.3013	24.8533	25.4586	39.256	214.85
tr|A0A834H0N4|A0A834H0N4_RHOSS;tr|A0A6A4LWK5|A0A6A4LWK5_9ERIC;tr|A0A6A4M870|A0A6A4M870_9ERIC;tr|A0A834HPX5|A0A834HPX5_RHOSS	tr|A0A834H0N4|A0A834H0N4_RHOSS Sec16_C domain-containing protein OS=Rhododendron simsii OX=118357 GN=RHSIM_Rhsim07G0059400 PE=3 SV=1;tr|A0A6A4LWK5|A0A6A4LWK5_9ERIC Sec16_C domain-containing protein (Fragment) OS=Rhododendron williamsianum OX=262921 GN=C3L3	26.3409	26.3452	26.3922	126.3	214.61
tr|A0A834GQ61|A0A834GQ61_RHOSS;tr|A0A6A4LQ76|A0A6A4LQ76_9ERIC;tr|A0A834HBA4|A0A834HBA4_RHOSS;tr|A0A6A4LKQ4|A0A6A4LKQ4_9ERIC;tr|A0A834LMC4|A0A834LMC4_RHOSS	tr|A0A834GQ61|A0A834GQ61_RHOSS Uncharacterized protein OS=Rhododendron simsii OX=118357 GN=RHSIM_Rhsim07G0252800 PE=3 SV=1;tr|A0A6A4LQ76|A0A6A4LQ76_9ERIC Uncharacterized protein (Fragment) OS=Rhododendron williamsianum OX=262921 GN=C3L33_09434 PE=3 SV=1	26.8858	26.9096	27.3135	59.791	209.43
tr|A0A834L399|A0A834L399_RHOSS;tr|A0A6A4LVK2|A0A6A4LVK2_9ERIC	tr|A0A834L399|A0A834L399_RHOSS Endoglucanase OS=Rhododendron simsii OX=118357 GN=RHSIM_Rhsim13G0008700 PE=3 SV=1;tr|A0A6A4LVK2|A0A6A4LVK2_9ERIC Pectinesterase (Fragment) OS=Rhododendron williamsianum OX=262921 GN=C3L33_07636 PE=3 SV=1	26.7268	27.123	29.5053	221.41	209.17
tr|A0A834H752|A0A834H752_RHOSS	tr|A0A834H752|A0A834H752_RHOSS Malic enzyme OS=Rhododendron simsii OX=118357 GN=RHSIM_Rhsim03G0237400 PE=3 SV=1	27.7426	27.1142	26.0908	66.37	205.47
tr|A0A834G7N9|A0A834G7N9_RHOSS;tr|A0A6A4KWF1|A0A6A4KWF1_9ERIC;tr|A0A6A4KSV2|A0A6A4KSV2_9ERIC	tr|A0A834G7N9|A0A834G7N9_RHOSS S-methyl-5-thioribose kinase OS=Rhododendron simsii OX=118357 GN=RHSIM_Rhsim11G0159300 PE=3 SV=1;tr|A0A6A4KWF1|A0A6A4KWF1_9ERIC APH domain-containing protein (Fragment) OS=Rhododendron williamsianum OX=262921 GN=C3L33_20953 P	26.9156	NaN	25.9905	47.425	196.99
tr|A0A834GNJ2|A0A834GNJ2_RHOSS;tr|A0A6A4LM78|A0A6A4LM78_9ERIC;tr|A0A6A4KCQ8|A0A6A4KCQ8_9ERIC	tr|A0A834GNJ2|A0A834GNJ2_RHOSS Malic enzyme OS=Rhododendron simsii OX=118357 GN=RHSIM_Rhsim07G0145700 PE=3 SV=1;tr|A0A6A4LM78|A0A6A4LM78_9ERIC Malic enzyme (Fragment) OS=Rhododendron williamsianum OX=262921 GN=C3L33_08946 PE=3 SV=1	23.558	25.1449	23.9948	78.024	194.18
tr|A0A834FXD5|A0A834FXD5_RHOSS;tr|A0A6A4LMW6|A0A6A4LMW6_9ERIC	tr|A0A834FXD5|A0A834FXD5_RHOSS Alanine--glyoxylate transaminase OS=Rhododendron simsii OX=118357 GN=RHSIM_Rhsim13G0215900 PE=3 SV=1;tr|A0A6A4LMW6|A0A6A4LMW6_9ERIC Aminotran_5 domain-containing protein (Fragment) OS=Rhododendron williamsianum OX=262921 GN=C	27.3066	25.4501	26.673	45.891	192.37
tr|A0A834GG08|A0A834GG08_RHOSS;tr|A0A6A4L8L6|A0A6A4L8L6_9ERIC	tr|A0A834GG08|A0A834GG08_RHOSS Ubiquitinyl hydrolase 1 OS=Rhododendron simsii OX=118357 GN=RHSIM_Rhsim09G0140000 PE=3 SV=1;tr|A0A6A4L8L6|A0A6A4L8L6_9ERIC Ubiquitinyl hydrolase 1 (Fragment) OS=Rhododendron williamsianum OX=262921 GN=C3L33_16853 PE=3 SV=1	26.7004	25.1097	24.8264	166.8	181.72
tr|A0A834G059|A0A834G059_RHOSS;tr|A0A6A4M0T2|A0A6A4M0T2_9ERIC	tr|A0A834G059|A0A834G059_RHOSS Lipoxygenase OS=Rhododendron simsii OX=118357 GN=RHSIM_Rhsim13G0225600 PE=3 SV=1	29.0167	27.5775	27.6094	101.61	181.44
tr|A0A6A4LWC6|A0A6A4LWC6_9ERIC;tr|A0A834GQW0|A0A834GQW0_RHOSS;tr|A0A834LJI3|A0A834LJI3_RHOSS	tr|A0A6A4LWC6|A0A6A4LWC6_9ERIC AAA domain-containing protein (Fragment) OS=Rhododendron williamsianum OX=262921 GN=C3L33_09483 PE=3 SV=1;tr|A0A834GQW0|A0A834GQW0_RHOSS AAA domain-containing protein OS=Rhododendron simsii OX=118357 GN=RHSIM_Rhsim07G0243000	26.1755	27.4873	27.6726	44.702	179.55
tr|A0A6A4KMR0|A0A6A4KMR0_9ERIC;tr|A0A834LQF6|A0A834LQF6_RHOSS	tr|A0A6A4KMR0|A0A6A4KMR0_9ERIC Uncharacterized protein (Fragment) OS=Rhododendron williamsianum OX=262921 GN=C3L33_22717 PE=3 SV=1;tr|A0A834LQF6|A0A834LQF6_RHOSS Uncharacterized protein OS=Rhododendron simsii OX=118357 GN=RHSIM_Rhsim04G0127300 PE=3 SV=1	NaN	NaN	25.0329	50.295	179.49
tr|A0A6A4MAP8|A0A6A4MAP8_9ERIC;tr|A0A834M2I7|A0A834M2I7_RHOSS	tr|A0A6A4MAP8|A0A6A4MAP8_9ERIC S-(hydroxymethyl)glutathione dehydrogenase (Fragment) OS=Rhododendron williamsianum OX=262921 GN=C3L33_04286 PE=3 SV=1;tr|A0A834M2I7|A0A834M2I7_RHOSS S-(hydroxymethyl)glutathione dehydrogenase OS=Rhododendron simsii OX=118357	26.6309	28.8989	27.5385	41.122	176.86
tr|A0A834G4T4|A0A834G4T4_RHOSS;tr|A0A6A4LBA2|A0A6A4LBA2_9ERIC	tr|A0A834G4T4|A0A834G4T4_RHOSS Uncharacterized protein OS=Rhododendron simsii OX=118357 GN=RHSIM_Rhsim12G0006200 PE=3 SV=1;tr|A0A6A4LBA2|A0A6A4LBA2_9ERIC Uncharacterized protein (Fragment) OS=Rhododendron williamsianum OX=262921 GN=C3L33_13201 PE=3 SV=1	NaN	24.2849	25.7116	68.129	176.68
tr|A0A834GRY6|A0A834GRY6_RHOSS;tr|A0A834LTB3|A0A834LTB3_RHOSS;tr|A0A6A4LGI0|A0A6A4LGI0_9ERIC;tr|A0A6A4M2V8|A0A6A4M2V8_9ERIC;tr|A0A6A4LJV0|A0A6A4LJV0_9ERIC	tr|A0A834GRY6|A0A834GRY6_RHOSS HATPase_c domain-containing protein OS=Rhododendron simsii OX=118357 GN=RHSIM_Rhsim06G0232600 PE=3 SV=1;tr|A0A834LTB3|A0A834LTB3_RHOSS HATPase_c domain-containing protein OS=Rhododendron simsii OX=118357 GN=RHSIM_Rhsim03G0191	26.578	27.5704	27.5919	80.318	176.32
tr|A0A834GTK2|A0A834GTK2_RHOSS;tr|A0A834GV77|A0A834GV77_RHOSS;tr|A0A6A4L8F6|A0A6A4L8F6_9ERIC;tr|A0A1J0A0N6|A0A1J0A0N6_RHOML;tr|A0A6A4LLS6|A0A6A4LLS6_9ERIC	tr|A0A834GTK2|A0A834GTK2_RHOSS Glyceraldehyde-3-phosphate dehydrogenase OS=Rhododendron simsii OX=118357 GN=RHSIM_Rhsim07G0257000 PE=3 SV=1;tr|A0A834GV77|A0A834GV77_RHOSS Glyceraldehyde-3-phosphate dehydrogenase OS=Rhododendron simsii OX=118357 GN=RHSIM_Rh	24.8698	NaN	NaN	45.666	171.99
tr|A0A834G0K1|A0A834G0K1_RHOSS;tr|A0A6A4L7J4|A0A6A4L7J4_9ERIC;tr|A0A834LTV7|A0A834LTV7_RHOSS	tr|A0A834G0K1|A0A834G0K1_RHOSS Acetylornithine transaminase OS=Rhododendron simsii OX=118357 GN=RHSIM_Rhsim12G0188700 PE=3 SV=1;tr|A0A6A4L7J4|A0A6A4L7J4_9ERIC Acetylornithine transaminase (Fragment) OS=Rhododendron williamsianum OX=262921 GN=C3L33_14541 PE	NaN	23.6516	NaN	48.429	165.13
tr|A0A6A4KPL6|A0A6A4KPL6_9ERIC	tr|A0A6A4KPL6|A0A6A4KPL6_9ERIC Phosphoglycerate kinase (Fragment) OS=Rhododendron williamsianum OX=262921 GN=C3L33_22991 PE=3 SV=1	25.1684	24.2415	24.6282	76.481	163.51
tr|A0A6A4KRB6|A0A6A4KRB6_9ERIC;tr|A0A834GYN0|A0A834GYN0_RHOSS	tr|A0A6A4KRB6|A0A6A4KRB6_9ERIC Uncharacterized protein (Fragment) OS=Rhododendron williamsianum OX=262921 GN=C3L33_19823 PE=4 SV=1;tr|A0A834GYN0|A0A834GYN0_RHOSS Uncharacterized protein OS=Rhododendron simsii OX=118357 GN=RHSIM_Rhsim05G0069700 PE=4 SV=1	27.6413	28.2989	27.3767	144.49	161.86
tr|A0A6A4MFR9|A0A6A4MFR9_9ERIC;tr|A0A834LH06|A0A834LH06_RHOSS;tr|A0A6A4KWV1|A0A6A4KWV1_9ERIC;tr|A0A834LA70|A0A834LA70_RHOSS	tr|A0A6A4MFR9|A0A6A4MFR9_9ERIC UTP--glucose-1-phosphate uridylyltransferase (Fragment) OS=Rhododendron williamsianum OX=262921 GN=C3L33_01816 PE=3 SV=1;tr|A0A834LH06|A0A834LH06_RHOSS UTP--glucose-1-phosphate uridylyltransferase OS=Rhododendron simsii OX=11	25.554	25.1186	25.35	64.168	161.31
tr|A0A6A4L3X7|A0A6A4L3X7_9ERIC	tr|A0A6A4L3X7|A0A6A4L3X7_9ERIC Fructose-bisphosphate aldolase (Fragment) OS=Rhododendron williamsianum OX=262921 GN=C3L33_13780 PE=3 SV=1	26.2296	NaN	24.7864	37.859	160.87
tr|A0A6A4MCT2|A0A6A4MCT2_9ERIC;tr|A0A6A4M6I6|A0A6A4M6I6_9ERIC;tr|A0A6A4KHV6|A0A6A4KHV6_9ERIC	tr|A0A6A4MCT2|A0A6A4MCT2_9ERIC Succinate dehydrogenase (quinone) (Fragment) OS=Rhododendron williamsianum OX=262921 GN=C3L33_01129 PE=3 SV=1	26.4649	27.1626	27.1999	72.2	160.6
tr|A0A834G575|A0A834G575_RHOSS;tr|A0A6A4KV52|A0A6A4KV52_9ERIC	tr|A0A834G575|A0A834G575_RHOSS S-adenosylmethionine synthase OS=Rhododendron simsii OX=118357 GN=RHSIM_Rhsim11G0100300 PE=3 SV=1	27.0137	26.9736	27.4122	43.439	159.96
tr|A0A6A4LGF2|A0A6A4LGF2_9ERIC;tr|A0A834L741|A0A834L741_RHOSS	tr|A0A6A4LGF2|A0A6A4LGF2_9ERIC Uncharacterized protein (Fragment) OS=Rhododendron williamsianum OX=262921 GN=C3L33_13738 PE=3 SV=1;tr|A0A834L741|A0A834L741_RHOSS Uncharacterized protein OS=Rhododendron simsii OX=118357 GN=RHSIM_Rhsim12G0083200 PE=3 SV=1	26.0823	26.2073	27.067	102.61	159.25
tr|A0A6A4M7F2|A0A6A4M7F2_9ERIC;tr|A0A834GHC0|A0A834GHC0_RHOSS	tr|A0A6A4M7F2|A0A6A4M7F2_9ERIC Formate dehydrogenase (Fragment) OS=Rhododendron williamsianum OX=262921 GN=C3L33_01595 PE=3 SV=1;tr|A0A834GHC0|A0A834GHC0_RHOSS Formate dehydrogenase, mitochondrial OS=Rhododendron simsii OX=118357 GN=RHSIM_Rhsim08G0055000 P	26.7767	28.225	26.7714	43.058	155.5
tr|A0A834LBG0|A0A834LBG0_RHOSS;tr|A0A6A4L5C0|A0A6A4L5C0_9ERIC;tr|A0A834GA42|A0A834GA42_RHOSS;tr|A0A6A4KRD5|A0A6A4KRD5_9ERIC	tr|A0A834LBG0|A0A834LBG0_RHOSS Uncharacterized protein OS=Rhododendron simsii OX=118357 GN=RHSIM_Rhsim10G0186400 PE=3 SV=1;tr|A0A6A4L5C0|A0A6A4L5C0_9ERIC Uncharacterized protein (Fragment) OS=Rhododendron williamsianum OX=262921 GN=C3L33_17935 PE=3 SV=1;tr	26.4601	26.9239	26.6051	81.354	154.74
tr|A0A834FZR7|A0A834FZR7_RHOSS;tr|A0A6A4LZ25|A0A6A4LZ25_9ERIC;tr|A0A834L217|A0A834L217_RHOSS	tr|A0A834FZR7|A0A834FZR7_RHOSS Aminomethyltransferase OS=Rhododendron simsii OX=118357 GN=RHSIM_Rhsim13G0152700 PE=3 SV=1;tr|A0A6A4LZ25|A0A6A4LZ25_9ERIC Uncharacterized protein (Fragment) OS=Rhododendron williamsianum OX=262921 GN=C3L33_06430 PE=3 SV=1;tr|	27.0549	27.0707	26.2468	44.458	154.49
tr|A0A834GK15|A0A834GK15_RHOSS;tr|A0A834GN50|A0A834GN50_RHOSS;tr|A0A6A4MKJ0|A0A6A4MKJ0_9ERIC;tr|A0A834L8L5|A0A834L8L5_RHOSS;tr|A0A6A4L7V0|A0A6A4L7V0_9ERIC;tr|B6E2B5|B6E2B5_VACCO	tr|A0A834GK15|A0A834GK15_RHOSS Epimerase domain-containing protein OS=Rhododendron simsii OX=118357 GN=RHSIM_Rhsim08G0207100 PE=4 SV=1;tr|A0A834GN50|A0A834GN50_RHOSS Epimerase domain-containing protein OS=Rhododendron simsii OX=118357 GN=RHSIM_Rhsim08G0206	NaN	NaN	24.8318	29.713	153.64
tr|A0A834HG31|A0A834HG31_RHOSS;tr|A0A6A4M105|A0A6A4M105_9ERIC;tr|A0A834LJJ4|A0A834LJJ4_RHOSS	tr|A0A834HG31|A0A834HG31_RHOSS AAA domain-containing protein OS=Rhododendron simsii OX=118357 GN=RHSIM_Rhsim02G0193400 PE=3 SV=1;tr|A0A6A4M105|A0A6A4M105_9ERIC AAA domain-containing protein (Fragment) OS=Rhododendron williamsianum OX=262921 GN=C3L33_07818	26.3017	NaN	26.3928	51.782	151.09
tr|A0A6A4LV24|A0A6A4LV24_9ERIC;tr|A0A6H0F007|A0A6H0F007_9ERIC;tr|A0A834G0V8|A0A834G0V8_RHOSS;tr|A0A6H0EXT9|A0A6H0EXT9_9ERIC;tr|A0A834GZG3|A0A834GZG3_RHOSS;tr|A0A6H0EZL9|A0A6H0EZL9_9ERIC;tr|A0A6H0EZ87|A0A6H0EZ87_9ERIC;tr|A0A6H0F0G9|A0A6H0F0G9_9ERIC;tr|A0A6H0EZ99|A0A6H0EZ99_9ERIC;tr|G3BG27|G3BG27_9ERIC;tr|A0A6A4KXV0|A0A6A4KXV0_9ERIC;tr|A0A6H0EXU2|A0A6H0EXU2_9ERIC;tr|K4EK83|K4EK83_9ERIC;tr|K4EJU0|K4…	tr|A0A6A4LV24|A0A6A4LV24_9ERIC ATPase_AAA_core domain-containing protein (Fragment) OS=Rhododendron williamsianum OX=262921 GN=C3L33_07022 PE=3 SV=1;tr|A0A6H0F007|A0A6H0F007_9ERIC Chloroplast ribulose bisphosphate carboxylase/oxygenase activase 2 transcrip	27.7584	25.1957	25.9339	51.542	150.92
tr|A0A834L7X1|A0A834L7X1_RHOSS;tr|A0A6A4LTZ2|A0A6A4LTZ2_9ERIC	tr|A0A834L7X1|A0A834L7X1_RHOSS FAD-binding PCMH-type domain-containing protein OS=Rhododendron simsii OX=118357 GN=RHSIM_Rhsim13G0123200 PE=3 SV=1	26.7474	27.5101	27.0493	59.316	144.8
tr|A0A6A4LP47|A0A6A4LP47_9ERIC;tr|A0A834GZZ4|A0A834GZZ4_RHOSS	tr|A0A6A4LP47|A0A6A4LP47_9ERIC Uncharacterized protein (Fragment) OS=Rhododendron williamsianum OX=262921 GN=C3L33_11753 PE=3 SV=1;tr|A0A834GZZ4|A0A834GZZ4_RHOSS Uncharacterized protein OS=Rhododendron simsii OX=118357 GN=RHSIM_Rhsim04G0029500 PE=3 SV=1	24.5794	24.6856	24.9544	44.173	144.46
tr|A0A834HAL3|A0A834HAL3_RHOSS;tr|A0A6A4MCJ4|A0A6A4MCJ4_9ERIC;tr|A0A6A4KHK8|A0A6A4KHK8_9ERIC;tr|A0A6A4KQF1|A0A6A4KQF1_9ERIC;tr|B0FGG5|B0FGG5_VACCO;tr|A0A834L3X7|A0A834L3X7_RHOSS	tr|A0A834HAL3|A0A834HAL3_RHOSS Pyr_redox_2 domain-containing protein OS=Rhododendron simsii OX=118357 GN=RHSIM_Rhsim03G0078300 PE=4 SV=1;tr|A0A6A4MCJ4|A0A6A4MCJ4_9ERIC Pyr_redox_2 domain-containing protein (Fragment) OS=Rhododendron williamsianum OX=262921	NaN	NaN	27.527	50.451	141.97
tr|A0A834GU39|A0A834GU39_RHOSS;tr|A0A6A4KVZ3|A0A6A4KVZ3_9ERIC;tr|A0A834HDL0|A0A834HDL0_RHOSS	tr|A0A834GU39|A0A834GU39_RHOSS Phosphoglycerate kinase OS=Rhododendron simsii OX=118357 GN=RHSIM_Rhsim05G0232900 PE=3 SV=1;tr|A0A6A4KVZ3|A0A6A4KVZ3_9ERIC Phosphoglycerate kinase (Fragment) OS=Rhododendron williamsianum OX=262921 GN=C3L33_20583 PE=3 SV=1	28.0179	27.2584	28.0175	42.447	141.95
tr|A0A834GT54|A0A834GT54_RHOSS;tr|A0A6A4KR64|A0A6A4KR64_9ERIC	tr|A0A834GT54|A0A834GT54_RHOSS Aspartate aminotransferase OS=Rhododendron simsii OX=118357 GN=RHSIM_Rhsim07G0162300 PE=3 SV=1;tr|A0A6A4KR64|A0A6A4KR64_9ERIC Aspartate aminotransferase (Fragment) OS=Rhododendron williamsianum OX=262921 GN=C3L33_22701 PE=3 S	26.6491	NaN	27.2623	57.39	141.27
tr|A0A834GN01|A0A834GN01_RHOSS;tr|A0A6A4M1C4|A0A6A4M1C4_9ERIC;tr|A0A6A4K6V9|A0A6A4K6V9_9ERIC	tr|A0A834GN01|A0A834GN01_RHOSS Uncharacterized protein OS=Rhododendron simsii OX=118357 GN=RHSIM_Rhsim08G0129000 PE=3 SV=1;tr|A0A6A4M1C4|A0A6A4M1C4_9ERIC Uncharacterized protein (Fragment) OS=Rhododendron williamsianum OX=262921 GN=C3L33_01014 PE=3 SV=1	25.943	24.7187	24.4353	34.911	140.52
tr|A0A6A4L2U8|A0A6A4L2U8_9ERIC;tr|A0A834HCM7|A0A834HCM7_RHOSS	tr|A0A6A4L2U8|A0A6A4L2U8_9ERIC Uncharacterized protein (Fragment) OS=Rhododendron williamsianum OX=262921 GN=C3L33_15673 PE=4 SV=1;tr|A0A834HCM7|A0A834HCM7_RHOSS Obg-like ATPase 1 OS=Rhododendron simsii OX=118357 GN=RHSIM_Rhsim02G0162600 PE=3 SV=1	25.0503	25.8644	26.5047	38.907	140.28
tr|A0A834LVL9|A0A834LVL9_RHOSS;tr|A0A834LFD5|A0A834LFD5_RHOSS;tr|A0A6A4KRP9|A0A6A4KRP9_9ERIC;tr|A0A6A4L6P5|A0A6A4L6P5_9ERIC;tr|A0A834G6W7|A0A834G6W7_RHOSS;tr|A0A6A4LPA6|A0A6A4LPA6_9ERIC;tr|A0A6A4M299|A0A6A4M299_9ERIC;tr|A0A834H0Q4|A0A834H0Q4_RHOSS;tr|A0A6A4KQ05|A0A6A4KQ05_9ERIC;tr|A0A6A4KUN6|A0A6A4KUN6_9ERIC	tr|A0A834LVL9|A0A834LVL9_RHOSS Uncharacterized protein OS=Rhododendron simsii OX=118357 GN=RHSIM_Rhsim01G0227200 PE=3 SV=1;tr|A0A834LFD5|A0A834LFD5_RHOSS Uncharacterized protein OS=Rhododendron simsii OX=118357 GN=RHSIM_Rhsim03G0130900 PE=3 SV=1;tr|A0A6A4K	26.506	27.2549	27.5187	41.656	139.99
tr|A0A834GSE0|A0A834GSE0_RHOSS;tr|A0A834LSV3|A0A834LSV3_RHOSS;tr|A0A834H3W3|A0A834H3W3_RHOSS;tr|A0A834G3R5|A0A834G3R5_RHOSS;tr|A0A834LMG5|A0A834LMG5_RHOSS;tr|A0A834FSZ1|A0A834FSZ1_RHOSS;tr|A0A834LIG9|A0A834LIG9_RHOSS;tr|A0A834LR59|A0A834LR59_RHOSS;tr|A0A834H2B7|A0A834H2B7_RHOSS;tr|A0A834G007|A0A834G007_RHOSS	tr|A0A834GSE0|A0A834GSE0_RHOSS Uncharacterized protein OS=Rhododendron simsii OX=118357 GN=RHSIM_Rhsim06G0241500 PE=4 SV=1;tr|A0A834LSV3|A0A834LSV3_RHOSS Ubiquitin-like domain-containing protein OS=Rhododendron simsii OX=118357 GN=RHSIM_Rhsim04G0245900 PE=	28.3138	28.6462	28.618	17.122	136.34
tr|A0A834GT97|A0A834GT97_RHOSS;tr|A0A6A4LSX3|A0A6A4LSX3_9ERIC	tr|A0A834GT97|A0A834GT97_RHOSS Methyltransferase OS=Rhododendron simsii OX=118357 GN=RHSIM_Rhsim06G0080700 PE=3 SV=1;tr|A0A6A4LSX3|A0A6A4LSX3_9ERIC Methyltransferase (Fragment) OS=Rhododendron williamsianum OX=262921 GN=C3L33_10677 PE=3 SV=1	24.2577	24.0951	NaN	78.993	134.96
tr|A0A6A4M6I9|A0A6A4M6I9_9ERIC;tr|A0A834HJW7|A0A834HJW7_RHOSS	tr|A0A6A4M6I9|A0A6A4M6I9_9ERIC Uncharacterized protein (Fragment) OS=Rhododendron williamsianum OX=262921 GN=C3L33_04248 PE=3 SV=1;tr|A0A834HJW7|A0A834HJW7_RHOSS Uncharacterized protein OS=Rhododendron simsii OX=118357 GN=RHSIM_Rhsim01G0263200 PE=3 SV=1	29.0378	29.9952	30.1271	55.392	134.25
tr|A0A834LH50|A0A834LH50_RHOSS;tr|A0A6A4KYV8|A0A6A4KYV8_9ERIC;tr|A0A834LF28|A0A834LF28_RHOSS;tr|A0A834LED3|A0A834LED3_RHOSS;tr|A0A834GDT5|A0A834GDT5_RHOSS;tr|A0A6A4LAD3|A0A6A4LAD3_9ERIC;tr|A0A6A4L2E8|A0A6A4L2E8_9ERIC;tr|A0A6A4K6H1|A0A6A4K6H1_9ERIC;tr|A0A834LE34|A0A834LE34_RHOSS;tr|A0A6A4LE65|A0A6A4LE65_9ERIC;tr|A0A834HAE0|A0A834HAE0_RHOSS;tr|A0A6A4KPN5|A0A6A4KPN5_9ERIC;tr|A0A6A4L8R3|A0A6A4L8R3_9E…	tr|A0A834LH50|A0A834LH50_RHOSS Acyl-[acyl-carrier-protein] desaturase OS=Rhododendron simsii OX=118357 GN=RHSIM_Rhsim09G0009000 PE=3 SV=1;tr|A0A6A4KYV8|A0A6A4KYV8_9ERIC Acyl-[acyl-carrier-protein] desaturase (Fragment) OS=Rhododendron williamsianum OX=2629	24.0067	25.4453	23.8829	45.594	132.03
tr|A0A6A4LBB6|A0A6A4LBB6_9ERIC	tr|A0A6A4LBB6|A0A6A4LBB6_9ERIC Uncharacterized protein (Fragment) OS=Rhododendron williamsianum OX=262921 GN=C3L33_16054 PE=4 SV=1	26.989	26.5637	NaN	97.754	128.24
tr|A0A834HFN0|A0A834HFN0_RHOSS;tr|A0A6A4LC41|A0A6A4LC41_9ERIC	tr|A0A834HFN0|A0A834HFN0_RHOSS Serine hydroxymethyltransferase OS=Rhododendron simsii OX=118357 GN=RHSIM_Rhsim02G0062000 PE=3 SV=1;tr|A0A6A4LC41|A0A6A4LC41_9ERIC Serine hydroxymethyltransferase (Fragment) OS=Rhododendron williamsianum OX=262921 GN=C3L33_15	25.8761	25.9656	25.1741	52.015	128.08
tr|A0A6A4LWC5|A0A6A4LWC5_9ERIC;tr|I1U4L1|I1U4L1_9ERIC;tr|A0A834L8N7|A0A834L8N7_RHOSS;tr|A0A6A4L023|A0A6A4L023_9ERIC	tr|A0A6A4LWC5|A0A6A4LWC5_9ERIC Uncharacterized protein (Fragment) OS=Rhododendron williamsianum OX=262921 GN=C3L33_05743 PE=3 SV=1	25.5684	23.17	23.4655	43.658	125.22
tr|A0A834G3A7|A0A834G3A7_RHOSS;tr|A0A6A4LFD6|A0A6A4LFD6_9ERIC;tr|A0A834H0E9|A0A834H0E9_RHOSS;tr|A0A6A4KXH4|A0A6A4KXH4_9ERIC;tr|A0A834LCG4|A0A834LCG4_RHOSS	tr|A0A834G3A7|A0A834G3A7_RHOSS Phosphoglycerate mutase (2,3-diphosphoglycerate-independent) OS=Rhododendron simsii OX=118357 GN=RHSIM_Rhsim12G0013400 PE=3 SV=1;tr|A0A6A4LFD6|A0A6A4LFD6_9ERIC Phosphoglycerate mutase (2,3-diphosphoglycerate-independent) (Fra	25.8474	24.6492	24.365	61.193	124.81
tr|A0A834LB86|A0A834LB86_RHOSS;tr|A0A6A4KSS7|A0A6A4KSS7_9ERIC	tr|A0A834LB86|A0A834LB86_RHOSS Uncharacterized protein OS=Rhododendron simsii OX=118357 GN=RHSIM_Rhsim11G0160800 PE=3 SV=1;tr|A0A6A4KSS7|A0A6A4KSS7_9ERIC Uncharacterized protein (Fragment) OS=Rhododendron williamsianum OX=262921 GN=C3L33_20941 PE=3 SV=1	24.0007	23.2063	NaN	56.591	123.44
tr|A0A6A4KNN8|A0A6A4KNN8_9ERIC	tr|A0A6A4KNN8|A0A6A4KNN8_9ERIC Carboxypeptidase (Fragment) OS=Rhododendron williamsianum OX=262921 GN=C3L33_20901 PE=3 SV=1	30.2163	30.5785	29.9607	65.949	122.35
tr|A0A834LGT6|A0A834LGT6_RHOSS;tr|A0A6A4L3S3|A0A6A4L3S3_9ERIC;tr|A0A834HEP1|A0A834HEP1_RHOSS;tr|A0A834LEY6|A0A834LEY6_RHOSS	tr|A0A834LGT6|A0A834LGT6_RHOSS Phosphoglucomutase (alpha-D-glucose-1,6-bisphosphate-dependent) OS=Rhododendron simsii OX=118357 GN=RHSIM_Rhsim09G0093200 PE=3 SV=1;tr|A0A6A4L3S3|A0A6A4L3S3_9ERIC Phosphoglucomutase (alpha-D-glucose-1,6-bisphosphate-dependent	26.4689	26.2095	25.9477	68.365	122.09
tr|A0A6A4LWX5|A0A6A4LWX5_9ERIC;tr|A0A834LXH2|A0A834LXH2_RHOSS;tr|A0A834GQF8|A0A834GQF8_RHOSS;tr|A0A6A4LGW8|A0A6A4LGW8_9ERIC;tr|A0A834LN28|A0A834LN28_RHOSS;tr|A0A834GSP6|A0A834GSP6_RHOSS;tr|A0A834GTZ9|A0A834GTZ9_RHOSS	tr|A0A6A4LWX5|A0A6A4LWX5_9ERIC Vacuolar proton pump subunit B (Fragment) OS=Rhododendron williamsianum OX=262921 GN=C3L33_05542 PE=3 SV=1;tr|A0A834LXH2|A0A834LXH2_RHOSS Uncharacterized protein OS=Rhododendron simsii OX=118357 GN=RHSIM_Rhsim01G0025200 PE=3	22.8411	NaN	24.0469	58.727	120.55
tr|A0A076NBT0|A0A076NBT0_VACCO	tr|A0A076NBT0|A0A076NBT0_VACCO O-methyltransferase OS=Vaccinium corymbosum OX=69266 PE=2 SV=1	24.3464	NaN	24.6317	40.33	120.19
tr|A0A6A4KS97|A0A6A4KS97_9ERIC;tr|A0A834LCS5|A0A834LCS5_RHOSS	tr|A0A6A4KS97|A0A6A4KS97_9ERIC Sucrose-phosphatase (Fragment) OS=Rhododendron williamsianum OX=262921 GN=C3L33_17623 PE=3 SV=1;tr|A0A834LCS5|A0A834LCS5_RHOSS Sucrose-phosphatase OS=Rhododendron simsii OX=118357 GN=RHSIM_Rhsim09G0022800 PE=3 SV=1	25.6568	24.6866	24.758	48.584	117.38
tr|A0A6A4L5U5|A0A6A4L5U5_9ERIC;tr|A0A834LFS1|A0A834LFS1_RHOSS	tr|A0A6A4L5U5|A0A6A4L5U5_9ERIC HATPase_c domain-containing protein (Fragment) OS=Rhododendron williamsianum OX=262921 GN=C3L33_16978 PE=3 SV=1;tr|A0A834LFS1|A0A834LFS1_RHOSS HATPase_c domain-containing protein OS=Rhododendron simsii OX=118357 GN=RHSIM_Rhsi	25.971	25.888	25.8011	85.798	117.38
tr|A0A6A4LMC4|A0A6A4LMC4_9ERIC;tr|A0A834H278|A0A834H278_RHOSS	tr|A0A6A4LMC4|A0A6A4LMC4_9ERIC Acylaminoacyl-peptidase (Fragment) OS=Rhododendron williamsianum OX=262921 GN=C3L33_12332 PE=3 SV=1;tr|A0A834H278|A0A834H278_RHOSS Acylaminoacyl-peptidase OS=Rhododendron simsii OX=118357 GN=RHSIM_Rhsim04G0195100 PE=3 SV=1	26.4604	26.2066	NaN	87.717	117.37
tr|A0A6A4MAB1|A0A6A4MAB1_9ERIC;tr|A0A834LZF6|A0A834LZF6_RHOSS	tr|A0A6A4MAB1|A0A6A4MAB1_9ERIC Uncharacterized protein (Fragment) OS=Rhododendron williamsianum OX=262921 GN=C3L33_04644 PE=3 SV=1;tr|A0A834LZF6|A0A834LZF6_RHOSS Uncharacterized protein OS=Rhododendron simsii OX=118357 GN=RHSIM_Rhsim01G0213500 PE=3 SV=1	24.4967	NaN	NaN	62.037	115.95
tr|A0A6A4KYX0|A0A6A4KYX0_9ERIC;tr|A0A834FV85|A0A834FV85_RHOSS	tr|A0A6A4KYX0|A0A6A4KYX0_9ERIC Ribos_L4_asso_C domain-containing protein (Fragment) OS=Rhododendron williamsianum OX=262921 GN=C3L33_20208 PE=3 SV=1;tr|A0A834FV85|A0A834FV85_RHOSS Ribos_L4_asso_C domain-containing protein OS=Rhododendron simsii OX=118357 G	26.8229	NaN	25.4921	43.244	115.85
tr|A0A834L8V9|A0A834L8V9_RHOSS;tr|A0A6A4LJJ5|A0A6A4LJJ5_9ERIC	tr|A0A834L8V9|A0A834L8V9_RHOSS AP-1 complex subunit gamma OS=Rhododendron simsii OX=118357 GN=RHSIM_Rhsim12G0047900 PE=3 SV=1;tr|A0A6A4LJJ5|A0A6A4LJJ5_9ERIC GAE domain-containing protein (Fragment) OS=Rhododendron williamsianum OX=262921 GN=C3L33_13500 PE=	24.1909	24.6915	NaN	95.936	113.46
tr|A0A834HCN3|A0A834HCN3_RHOSS;tr|A0A6A4M889|A0A6A4M889_9ERIC	tr|A0A834HCN3|A0A834HCN3_RHOSS Alanine--tRNA ligase OS=Rhododendron simsii OX=118357 GN=RHSIM_Rhsim03G0224600 PE=3 SV=1;tr|A0A6A4M889|A0A6A4M889_9ERIC Alanine--tRNA ligase (Fragment) OS=Rhododendron williamsianum OX=262921 GN=C3L33_03490 PE=3 SV=1	23.4625	23.9939	NaN	124.27	112.83
tr|A0A1J0A0R5|A0A1J0A0R5_RHOML;tr|A0A6A4KZE7|A0A6A4KZE7_9ERIC;tr|A0A6A4KUY8|A0A6A4KUY8_9ERIC;tr|A0A834G7T5|A0A834G7T5_RHOSS;tr|A0A834LNA7|A0A834LNA7_RHOSS	tr|A0A1J0A0R5|A0A1J0A0R5_RHOML RPL3 OS=Rhododendron molle OX=49168 GN=RPL3 PE=2 SV=1;tr|A0A6A4KZE7|A0A6A4KZE7_9ERIC Uncharacterized protein (Fragment) OS=Rhododendron williamsianum OX=262921 GN=C3L33_19794 PE=3 SV=1;tr|A0A6A4KUY8|A0A6A4KUY8_9ERIC Uncharact	26.4521	NaN	25.8038	44.42	112.59
tr|A0A834FVF5|A0A834FVF5_RHOSS;tr|A0A834LDX1|A0A834LDX1_RHOSS	tr|A0A834FVF5|A0A834FVF5_RHOSS Glucose-6-phosphate 1-dehydrogenase OS=Rhododendron simsii OX=118357 GN=RHSIM_RhsimUnG0241400 PE=3 SV=1;tr|A0A834LDX1|A0A834LDX1_RHOSS Glucose-6-phosphate 1-dehydrogenase OS=Rhododendron simsii OX=118357 GN=RHSIM_Rhsim10G0011	25.8597	25.331	24.1772	59.291	111.36
tr|A0A6A4LXB5|A0A6A4LXB5_9ERIC	tr|A0A6A4LXB5|A0A6A4LXB5_9ERIC Aminotran_1_2 domain-containing protein (Fragment) OS=Rhododendron williamsianum OX=262921 GN=C3L33_08098 PE=3 SV=1	26.0274	NaN	NaN	51.59	110.56
tr|A0A834HN43|A0A834HN43_RHOSS;tr|A0A6A4L9F4|A0A6A4L9F4_9ERIC;tr|A0A834G5A9|A0A834G5A9_RHOSS	tr|A0A834HN43|A0A834HN43_RHOSS Pyruvate kinase OS=Rhododendron simsii OX=118357 GN=RHSIM_Rhsim02G0031500 PE=3 SV=1;tr|A0A6A4L9F4|A0A6A4L9F4_9ERIC Pyruvate kinase (Fragment) OS=Rhododendron williamsianum OX=262921 GN=C3L33_15019 PE=3 SV=1	22.2915	NaN	NaN	62.929	109.8
tr|A0A6A4KSJ7|A0A6A4KSJ7_9ERIC;tr|A0A834GI64|A0A834GI64_RHOSS;tr|A0A0G3FEC2|A0A0G3FEC2_VACCO;tr|A0A8F5V7A4|A0A8F5V7A4_9ERIC	tr|A0A6A4KSJ7|A0A6A4KSJ7_9ERIC Fe2OG dioxygenase domain-containing protein (Fragment) OS=Rhododendron williamsianum OX=262921 GN=C3L33_22031 PE=3 SV=1;tr|A0A834GI64|A0A834GI64_RHOSS Fe2OG dioxygenase domain-containing protein OS=Rhododendron simsii OX=1183	NaN	NaN	25.5416	42.587	109.73
tr|A0A834L814|A0A834L814_RHOSS;tr|A0A834G1P2|A0A834G1P2_RHOSS	tr|A0A834L814|A0A834L814_RHOSS Aldehyde dehydrogenase (NAD(+)) OS=Rhododendron simsii OX=118357 GN=RHSIM_Rhsim12G0211100 PE=3 SV=1;tr|A0A834G1P2|A0A834G1P2_RHOSS Aldehyde dehydrogenase (NAD(+)) OS=Rhododendron simsii OX=118357 GN=RHSIM_Rhsim12G0210700 PE=3	25.9853	NaN	25.5327	54.735	109.46
tr|A0A6A4LSR1|A0A6A4LSR1_9ERIC	tr|A0A6A4LSR1|A0A6A4LSR1_9ERIC Uncharacterized protein (Fragment) OS=Rhododendron williamsianum OX=262921 GN=C3L33_04118 PE=4 SV=1	26.8123	27.7366	28.1873	72.19	108.89
tr|A0A834G8Y2|A0A834G8Y2_RHOSS;tr|A0A6A4L2V2|A0A6A4L2V2_9ERIC;tr|A0A6A4L3I7|A0A6A4L3I7_9ERIC;tr|A0A834LEQ5|A0A834LEQ5_RHOSS;REV__tr|A0A834L8L2|A0A834L8L2_RHOSS;REV__tr|A0A6A4LGN9|A0A6A4LGN9_9ERIC	tr|A0A834G8Y2|A0A834G8Y2_RHOSS Glutamate decarboxylase OS=Rhododendron simsii OX=118357 GN=RHSIM_Rhsim10G0183700 PE=3 SV=1;tr|A0A6A4L2V2|A0A6A4L2V2_9ERIC Glutamate decarboxylase (Fragment) OS=Rhododendron williamsianum OX=262921 GN=C3L33_17969 PE=3 SV=1	26.1625	25.9237	26.1362	54.997	108.35
tr|A0A6A4L4C5|A0A6A4L4C5_9ERIC;tr|A0A834GJ52|A0A834GJ52_RHOSS	tr|A0A6A4L4C5|A0A6A4L4C5_9ERIC Phosphoenolpyruvate carboxylase (Fragment) OS=Rhododendron williamsianum OX=262921 GN=C3L33_17031 PE=3 SV=1;tr|A0A834GJ52|A0A834GJ52_RHOSS Phosphoenolpyruvate carboxylase OS=Rhododendron simsii OX=118357 GN=RHSIM_Rhsim09G0114	25.1401	24.2285	24.0055	115.07	107.13
tr|A0A834GA44|A0A834GA44_RHOSS;tr|A0A6A4L2U1|A0A6A4L2U1_9ERIC;tr|A0A834GFV8|A0A834GFV8_RHOSS	tr|A0A834GA44|A0A834GA44_RHOSS ATP synthase subunit beta OS=Rhododendron simsii OX=118357 GN=RHSIM_Rhsim10G0077400 PE=3 SV=1;tr|A0A6A4L2U1|A0A6A4L2U1_9ERIC ATP synthase subunit beta (Fragment) OS=Rhododendron williamsianum OX=262921 GN=C3L33_18617 PE=3 SV=	NaN	NaN	25.1551	59.124	106.26
tr|A0A834GKP0|A0A834GKP0_RHOSS;tr|A0A6A4LHR3|A0A6A4LHR3_9ERIC;tr|A0A834HK56|A0A834HK56_RHOSS;tr|A0A6A4MAG6|A0A6A4MAG6_9ERIC	tr|A0A834GKP0|A0A834GKP0_RHOSS Protein kinase domain-containing protein OS=Rhododendron simsii OX=118357 GN=RHSIM_Rhsim07G0011800 PE=3 SV=1;tr|A0A6A4LHR3|A0A6A4LHR3_9ERIC Protein kinase domain-containing protein (Fragment) OS=Rhododendron williamsianum OX=	24.4233	25.2483	23.5849	45.417	104.45
tr|A0A834LZ41|A0A834LZ41_RHOSS;tr|A0A6A4M9V2|A0A6A4M9V2_9ERIC;tr|A0A834HV20|A0A834HV20_RHOSS;tr|A0A6A4M7G6|A0A6A4M7G6_9ERIC;tr|A0A6A4M1L9|A0A6A4M1L9_9ERIC;tr|A0A6A4KJ53|A0A6A4KJ53_9ERIC;tr|A0A834HBP1|A0A834HBP1_RHOSS	tr|A0A834LZ41|A0A834LZ41_RHOSS Uncharacterized protein OS=Rhododendron simsii OX=118357 GN=RHSIM_Rhsim01G0196200 PE=3 SV=1;tr|A0A6A4M9V2|A0A6A4M9V2_9ERIC Uncharacterized protein (Fragment) OS=Rhododendron williamsianum OX=262921 GN=C3L33_04792 PE=3 SV=1;tr	24.7248	24.6069	NaN	102.43	103.55
tr|A0A6A4LIB4|A0A6A4LIB4_9ERIC;tr|A0A834G2S7|A0A834G2S7_RHOSS	tr|A0A6A4LIB4|A0A6A4LIB4_9ERIC Uncharacterized protein (Fragment) OS=Rhododendron williamsianum OX=262921 GN=C3L33_13953 PE=3 SV=1	26.8606	24.9671	27.8765	43.025	103.23
tr|A0A834GQ77|A0A834GQ77_RHOSS;tr|A0A6A4LHI9|A0A6A4LHI9_9ERIC	tr|A0A834GQ77|A0A834GQ77_RHOSS Pyrophosphate--fructose 6-phosphate 1-phosphotransferase subunit alpha OS=Rhododendron simsii OX=118357 GN=PFP-ALPHA PE=3 SV=1	24.3915	NaN	NaN	66.582	100.95
tr|A0A834H9N1|A0A834H9N1_RHOSS;tr|A0A6A4MDE0|A0A6A4MDE0_9ERIC	tr|A0A834H9N1|A0A834H9N1_RHOSS Uncharacterized protein OS=Rhododendron simsii OX=118357 GN=RHSIM_Rhsim03G0022100 PE=4 SV=1;tr|A0A6A4MDE0|A0A6A4MDE0_9ERIC Uncharacterized protein (Fragment) OS=Rhododendron williamsianum OX=262921 GN=C3L33_02043 PE=4 SV=1	24.2433	23.9416	NaN	60.407	98.94
tr|A0A834G500|A0A834G500_RHOSS;tr|A0A6A4L8T9|A0A6A4L8T9_9ERIC;tr|A0A6A4L2V9|A0A6A4L2V9_9ERIC;tr|A0A834G4S9|A0A834G4S9_RHOSS	tr|A0A834G500|A0A834G500_RHOSS Pyruvate dehydrogenase E1 component subunit alpha OS=Rhododendron simsii OX=118357 GN=RHSIM_Rhsim12G0052000 PE=4 SV=1;tr|A0A6A4L8T9|A0A6A4L8T9_9ERIC E1_dh domain-containing protein (Fragment) OS=Rhododendron williamsianum OX=	24.5644	23.1966	24.9056	46.712	96.61
tr|A0A834GJX6|A0A834GJX6_RHOSS;tr|A0A834FV17|A0A834FV17_RHOSS;tr|A0A834GI92|A0A834GI92_RHOSS	tr|A0A834GJX6|A0A834GJX6_RHOSS Uncharacterized protein OS=Rhododendron simsii OX=118357 GN=RHSIM_Rhsim08G0192300 PE=3 SV=1;tr|A0A834FV17|A0A834FV17_RHOSS Uncharacterized protein OS=Rhododendron simsii OX=118357 GN=RHSIM_RhsimUnG0162400 PE=3 SV=1;tr|A0A834G	NaN	NaN	26.1659	35.825	94.733
tr|A0A834LIZ7|A0A834LIZ7_RHOSS;tr|A0A6A4LU60|A0A6A4LU60_9ERIC	tr|A0A834LIZ7|A0A834LIZ7_RHOSS Peptidase A1 domain-containing protein OS=Rhododendron simsii OX=118357 GN=RHSIM_Rhsim07G0067500 PE=3 SV=1;tr|A0A6A4LU60|A0A6A4LU60_9ERIC Peptidase A1 domain-containing protein (Fragment) OS=Rhododendron williamsianum OX=2629	26.165	NaN	26.5785	47.472	94.104
tr|A0A6A4L0A7|A0A6A4L0A7_9ERIC;tr|A0A834LFR9|A0A834LFR9_RHOSS	tr|A0A6A4L0A7|A0A6A4L0A7_9ERIC W2 domain-containing protein (Fragment) OS=Rhododendron williamsianum OX=262921 GN=C3L33_16910 PE=3 SV=1;tr|A0A834LFR9|A0A834LFR9_RHOSS W2 domain-containing protein OS=Rhododendron simsii OX=118357 GN=RHSIM_Rhsim09G0130400 PE	NaN	NaN	23.259	53.667	93.468
tr|A0A6A4KYB1|A0A6A4KYB1_9ERIC;tr|A0A834LFX9|A0A834LFX9_RHOSS;tr|A0A834GDU7|A0A834GDU7_RHOSS;tr|A0A834GB03|A0A834GB03_RHOSS;tr|A0A6A4KR19|A0A6A4KR19_9ERIC	tr|A0A6A4KYB1|A0A6A4KYB1_9ERIC Guanosine nucleotide diphosphate dissociation inhibitor (Fragment) OS=Rhododendron williamsianum OX=262921 GN=C3L33_17587 PE=3 SV=1;tr|A0A834LFX9|A0A834LFX9_RHOSS Guanosine nucleotide diphosphate dissociation inhibitor OS=Rho	24.92	24.8064	24.1348	46.155	91.488
tr|A0A834LPW2|A0A834LPW2_RHOSS;tr|A0A6A4LBQ1|A0A6A4LBQ1_9ERIC;tr|A0A6A4M5R7|A0A6A4M5R7_9ERIC;tr|A0A834H3Q3|A0A834H3Q3_RHOSS;tr|A0A6A4M5X1|A0A6A4M5X1_9ERIC;tr|A0A834FWW1|A0A834FWW1_RHOSS;tr|A0A834GCH4|A0A834GCH4_RHOSS	tr|A0A834LPW2|A0A834LPW2_RHOSS Pyruvate kinase OS=Rhododendron simsii OX=118357 GN=RHSIM_Rhsim04G0136600 PE=3 SV=1;tr|A0A6A4LBQ1|A0A6A4LBQ1_9ERIC Pyruvate kinase (Fragment) OS=Rhododendron williamsianum OX=262921 GN=C3L33_12355 PE=3 SV=1;tr|A0A6A4M5R7|A0A6	21.4221	22.5772	23.4424	57.496	91.155
tr|A0A834LM48|A0A834LM48_RHOSS;tr|A0A6A4KXD8|A0A6A4KXD8_9ERIC;tr|A0A834GX97|A0A834GX97_RHOSS;tr|A0A6A4LFE7|A0A6A4LFE7_9ERIC;tr|A0A834GXP5|A0A834GXP5_RHOSS	tr|A0A834LM48|A0A834LM48_RHOSS Asparagine--tRNA ligase OS=Rhododendron simsii OX=118357 GN=RHSIM_Rhsim05G0030300 PE=3 SV=1	25.682	25.894	25.4214	63.524	90.96
tr|A0A6A4LKF0|A0A6A4LKF0_9ERIC;tr|A0A834GLB4|A0A834GLB4_RHOSS	tr|A0A6A4LKF0|A0A6A4LKF0_9ERIC Peptidase A1 domain-containing protein (Fragment) OS=Rhododendron williamsianum OX=262921 GN=C3L33_09234 PE=3 SV=1;tr|A0A834GLB4|A0A834GLB4_RHOSS Peptidase A1 domain-containing protein OS=Rhododendron simsii OX=118357 GN=RHSI	26.7462	27.9137	28.7287	41.749	87.88
tr|A0A6A4MB24|A0A6A4MB24_9ERIC;tr|A0A834LV54|A0A834LV54_RHOSS	tr|A0A6A4MB24|A0A6A4MB24_9ERIC Peptidylprolyl isomerase (Fragment) OS=Rhododendron williamsianum OX=262921 GN=C3L33_04382 PE=4 SV=1;tr|A0A834LV54|A0A834LV54_RHOSS Peptidylprolyl isomerase OS=Rhododendron simsii OX=118357 GN=RHSIM_Rhsim01G0249900 PE=4 SV=1	24.7256	23.0479	NaN	64.016	87.365
tr|A0A834LUR2|A0A834LUR2_RHOSS;tr|A0A6A4MBT2|A0A6A4MBT2_9ERIC;tr|A0A834HJL8|A0A834HJL8_RHOSS;tr|A0A6A4M776|A0A6A4M776_9ERIC	tr|A0A834LUR2|A0A834LUR2_RHOSS 60S ribosomal protein L13 OS=Rhododendron simsii OX=118357 GN=RHSIM_Rhsim03G0219500 PE=3 SV=1;tr|A0A6A4MBT2|A0A6A4MBT2_9ERIC 60S ribosomal protein L13 (Fragment) OS=Rhododendron williamsianum OX=262921 GN=C3L33_03444 PE=3 SV=	23.4936	23.5267	NaN	23.861	87.053
tr|A0A834LWL5|A0A834LWL5_RHOSS;tr|A0A6A4LZ88|A0A6A4LZ88_9ERIC;tr|A0A834HC70|A0A834HC70_RHOSS;tr|A0A834HAD9|A0A834HAD9_RHOSS;tr|A0A1J0A0N4|A0A1J0A0N4_RHOML;tr|I1U4K9|I1U4K9_9ERIC;tr|A0A834H8C8|A0A834H8C8_RHOSS;tr|A0A834H9L9|A0A834H9L9_RHOSS;tr|A0A6A4LDX6|A0A6A4LDX6_9ERIC;tr|A0A6A4LMP1|A0A6A4LMP1_9ERIC;tr|A0A6A4KZH1|A0A6A4KZH1_9ERIC;tr|A0A6A4L8Z0|A0A6A4L8Z0_9ERIC;tr|A0A6A4MBW9|A0A6A4MBW9_9ERIC	tr|A0A834LWL5|A0A834LWL5_RHOSS Elongation factor 1-alpha OS=Rhododendron simsii OX=118357 GN=RHSIM_Rhsim01G0219100 PE=3 SV=1;tr|A0A6A4LZ88|A0A6A4LZ88_9ERIC Elongation factor 1-alpha (Fragment) OS=Rhododendron williamsianum OX=262921 GN=C3L33_04637 PE=3 SV=	28.2765	27.3664	27.4272	49.484	86.411
tr|A0A6A4M707|A0A6A4M707_9ERIC;tr|A0A834GJU7|A0A834GJU7_RHOSS;tr|A0A834GP77|A0A834GP77_RHOSS;tr|A0A834GM52|A0A834GM52_RHOSS	tr|A0A6A4M707|A0A6A4M707_9ERIC DHQ_synthase domain-containing protein (Fragment) OS=Rhododendron williamsianum OX=262921 GN=C3L33_01726 PE=3 SV=1;tr|A0A834GJU7|A0A834GJU7_RHOSS DHQ_synthase domain-containing protein OS=Rhododendron simsii OX=118357 GN=RHSI	NaN	NaN	24.0928	45.566	86.376
tr|A0A834LDN9|A0A834LDN9_RHOSS;tr|A0A6A4L0U5|A0A6A4L0U5_9ERIC	tr|A0A834LDN9|A0A834LDN9_RHOSS PKS_ER domain-containing protein OS=Rhododendron simsii OX=118357 GN=RHSIM_Rhsim09G0195700 PE=3 SV=1	27.8759	28.4481	26.5217	38.979	86.017
tr|A0A6A4LM51|A0A6A4LM51_9ERIC;tr|A0A834FZE9|A0A834FZE9_RHOSS	tr|A0A6A4LM51|A0A6A4LM51_9ERIC Pectin acetylesterase (Fragment) OS=Rhododendron williamsianum OX=262921 GN=C3L33_08971 PE=3 SV=1	26.1084	26.0775	26.2186	33.959	84.22
tr|A0A834FWC3|A0A834FWC3_RHOSS;tr|A0A6A4KUJ9|A0A6A4KUJ9_9ERIC	tr|A0A834FWC3|A0A834FWC3_RHOSS Aminotran_1_2 domain-containing protein OS=Rhododendron simsii OX=118357 GN=RHSIM_RhsimUnG0094700 PE=4 SV=1;tr|A0A6A4KUJ9|A0A6A4KUJ9_9ERIC Aminotran_1_2 domain-containing protein (Fragment) OS=Rhododendron williamsianum OX=26	24.8606	NaN	25.1409	48.996	84.157
tr|A0A834G7L1|A0A834G7L1_RHOSS	tr|A0A834G7L1|A0A834G7L1_RHOSS Fructose-bisphosphate aldolase OS=Rhododendron simsii OX=118357 GN=RHSIM_Rhsim11G0183800 PE=3 SV=1	28.8926	28.0517	26.8077	41.983	83.78
tr|A0A834H8M9|A0A834H8M9_RHOSS;tr|A0A6A4LMW5|A0A6A4LMW5_9ERIC	tr|A0A834H8M9|A0A834H8M9_RHOSS Fructose-bisphosphate aldolase OS=Rhododendron simsii OX=118357 GN=RHSIM_Rhsim04G0009800 PE=3 SV=1	28.676	NaN	29.3058	38.393	83.71
tr|A0A834GV24|A0A834GV24_RHOSS	tr|A0A834GV24|A0A834GV24_RHOSS Peptidase_S9 domain-containing protein OS=Rhododendron simsii OX=118357 GN=RHSIM_Rhsim06G0046300 PE=4 SV=1	24.4732	25.7074	NaN	86.402	83.377
tr|A0A834G776|A0A834G776_RHOSS;tr|A0A6A4LI37|A0A6A4LI37_9ERIC	tr|A0A834G776|A0A834G776_RHOSS Tryptophanyl-tRNA synthetase OS=Rhododendron simsii OX=118357 GN=RHSIM_Rhsim12G0003500 PE=3 SV=1;tr|A0A6A4LI37|A0A6A4LI37_9ERIC Tryptophanyl-tRNA synthetase (Fragment) OS=Rhododendron williamsianum OX=262921 GN=C3L33_13173 PE	24.4711	NaN	NaN	50.738	83.34
tr|A0A834LA35|A0A834LA35_RHOSS;tr|A0A6A4LD56|A0A6A4LD56_9ERIC;tr|A0A6A4KP57|A0A6A4KP57_9ERIC	tr|A0A834LA35|A0A834LA35_RHOSS Uncharacterized protein OS=Rhododendron simsii OX=118357 GN=RHSIM_Rhsim12G0136400 PE=3 SV=1;tr|A0A6A4LD56|A0A6A4LD56_9ERIC Uncharacterized protein (Fragment) OS=Rhododendron williamsianum OX=262921 GN=C3L33_14136 PE=3 SV=1	24.791	24.1758	26.3011	123.03	82.898
tr|A0A834H781|A0A834H781_RHOSS;tr|A0A834LIJ6|A0A834LIJ6_RHOSS;tr|A0A6A4LEN1|A0A6A4LEN1_9ERIC;tr|A0A834GU17|A0A834GU17_RHOSS;tr|A0A834GWM7|A0A834GWM7_RHOSS;tr|A0A834GB27|A0A834GB27_RHOSS;tr|A0A6A4L1U1|A0A6A4L1U1_9ERIC	tr|A0A834H781|A0A834H781_RHOSS Aldedh domain-containing protein OS=Rhododendron simsii OX=118357 GN=RHSIM_Rhsim03G0256500 PE=3 SV=1;tr|A0A834LIJ6|A0A834LIJ6_RHOSS Aldedh domain-containing protein OS=Rhododendron simsii OX=118357 GN=RHSIM_Rhsim07G0163900 PE	24.2559	NaN	24.4369	53.115	82.404
tr|A0A834H419|A0A834H419_RHOSS;tr|A0A6A4MEE4|A0A6A4MEE4_9ERIC	tr|A0A834H419|A0A834H419_RHOSS Malate dehydrogenase [NADP], chloroplastic OS=Rhododendron simsii OX=118357 GN=RHSIM_Rhsim03G0111900 PE=3 SV=1	NaN	25.0592	24.5756	47.841	81.843
tr|A0A6A4MJ14|A0A6A4MJ14_9ERIC;tr|A0A834LXI1|A0A834LXI1_RHOSS	tr|A0A6A4MJ14|A0A6A4MJ14_9ERIC Uncharacterized protein (Fragment) OS=Rhododendron williamsianum OX=262921 GN=C3L33_02156 PE=3 SV=1	NaN	NaN	26.2505	142.66	81.34
tr|A0A6A4LY36|A0A6A4LY36_9ERIC;tr|A0A834HG76|A0A834HG76_RHOSS;tr|A0A6A4L9J2|A0A6A4L9J2_9ERIC;tr|A0A834H1R6|A0A834H1R6_RHOSS	tr|A0A6A4LY36|A0A6A4LY36_9ERIC RRM domain-containing protein (Fragment) OS=Rhododendron williamsianum OX=262921 GN=C3L33_05083 PE=3 SV=1;tr|A0A834HG76|A0A834HG76_RHOSS RRM domain-containing protein OS=Rhododendron simsii OX=118357 GN=RHSIM_Rhsim01G0145200	NaN	24.6035	25.1024	82.009	80.614
tr|A0A834LHP6|A0A834LHP6_RHOSS;tr|A0A6A4MLR0|A0A6A4MLR0_9ERIC	tr|A0A834LHP6|A0A834LHP6_RHOSS Isocitrate dehydrogenase [NADP] OS=Rhododendron simsii OX=118357 GN=RHSIM_Rhsim08G0052400 PE=3 SV=1;tr|A0A6A4MLR0|A0A6A4MLR0_9ERIC Isocitrate dehydrogenase (NADP(+)) (Fragment) OS=Rhododendron williamsianum OX=262921 GN=C3L33	27.5027	26.3954	27.3229	53.248	78.7
tr|A0A6A4M353|A0A6A4M353_9ERIC;tr|A0A834LTR7|A0A834LTR7_RHOSS	tr|A0A6A4M353|A0A6A4M353_9ERIC Uncharacterized protein (Fragment) OS=Rhododendron williamsianum OX=262921 GN=C3L33_04247 PE=3 SV=1;tr|A0A834LTR7|A0A834LTR7_RHOSS Uncharacterized protein OS=Rhododendron simsii OX=118357 GN=RHSIM_Rhsim01G0263300 PE=3 SV=1	27.2147	27.021	27.4629	51.618	78.31
tr|A0A834LKG0|A0A834LKG0_RHOSS;tr|A0A6A4LYY1|A0A6A4LYY1_9ERIC	tr|A0A834LKG0|A0A834LKG0_RHOSS Pyr_redox_2 domain-containing protein OS=Rhododendron simsii OX=118357 GN=RHSIM_Rhsim07G0087700 PE=4 SV=1;tr|A0A6A4LYY1|A0A6A4LYY1_9ERIC Pyr_redox_2 domain-containing protein (Fragment) OS=Rhododendron williamsianum OX=262921	24.6524	NaN	23.54	54.106	77.072
tr|A0A834LF82|A0A834LF82_RHOSS	tr|A0A834LF82|A0A834LF82_RHOSS Alpha-galactosidase OS=Rhododendron simsii OX=118357 GN=RHSIM_Rhsim09G0025700 PE=3 SV=1	NaN	24.9418	25.0141	44.831	75.619
tr|A0A834H2F3|A0A834H2F3_RHOSS;tr|A0A834LQI9|A0A834LQI9_RHOSS;tr|A0A6A4KVW0|A0A6A4KVW0_9ERIC;tr|A0A6A4L0K5|A0A6A4L0K5_9ERIC	tr|A0A834H2F3|A0A834H2F3_RHOSS Isoleucyl-tRNA synthetase OS=Rhododendron simsii OX=118357 GN=RHSIM_Rhsim05G0075700 PE=3 SV=1	26.2096	25.4309	25.4	144.02	75.214
tr|A0A834G7H2|A0A834G7H2_RHOSS;tr|A0A6A4M7V2|A0A6A4M7V2_9ERIC	tr|A0A834G7H2|A0A834G7H2_RHOSS Acyl-coenzyme A oxidase OS=Rhododendron simsii OX=118357 GN=RHSIM_Rhsim11G0003700 PE=3 SV=1;tr|A0A6A4M7V2|A0A6A4M7V2_9ERIC ACOX domain-containing protein (Fragment) OS=Rhododendron williamsianum OX=262921 GN=C3L33_05235 PE=3	23.696	NaN	NaN	87.934	74.545
tr|A0A834GR00|A0A834GR00_RHOSS;tr|A0A6A4LHM4|A0A6A4LHM4_9ERIC	tr|A0A834GR00|A0A834GR00_RHOSS Malic enzyme OS=Rhododendron simsii OX=118357 GN=RHSIM_Rhsim07G0018800 PE=3 SV=1;tr|A0A6A4LHM4|A0A6A4LHM4_9ERIC Malic enzyme (Fragment) OS=Rhododendron williamsianum OX=262921 GN=C3L33_08008 PE=3 SV=1	23.8938	NaN	NaN	66.637	74.213
tr|A0A6A4LUE6|A0A6A4LUE6_9ERIC;tr|A0A834FYV5|A0A834FYV5_RHOSS;tr|A0A834FW55|A0A834FW55_RHOSS	tr|A0A6A4LUE6|A0A6A4LUE6_9ERIC Fumarylacetoacetase (Fragment) OS=Rhododendron williamsianum OX=262921 GN=C3L33_06478 PE=3 SV=1;tr|A0A834FYV5|A0A834FYV5_RHOSS Fumarylacetoacetase OS=Rhododendron simsii OX=118357 GN=RHSIM_Rhsim13G0146300 PE=3 SV=1;tr|A0A834F	26.5829	26.7684	26.8032	43.516	73.849
tr|A0A834LK28|A0A834LK28_RHOSS;tr|A0A834FZ38|A0A834FZ38_RHOSS;tr|A9ZMJ3|A9ZMJ3_9ERIC;tr|A0A385ZAE6|A0A385ZAE6_VACCO;tr|A0A6A4KPR3|A0A6A4KPR3_9ERIC	tr|A0A834LK28|A0A834LK28_RHOSS Fe2OG dioxygenase domain-containing protein OS=Rhododendron simsii OX=118357 GN=RHSIM_Rhsim07G0247500 PE=3 SV=1;tr|A0A834FZ38|A0A834FZ38_RHOSS Fe2OG dioxygenase domain-containing protein OS=Rhododendron simsii OX=118357 GN=RH	NaN	NaN	25.3374	40.553	72.396
tr|A0A834HND6|A0A834HND6_RHOSS;tr|A0A834H9C8|A0A834H9C8_RHOSS;tr|A0A6A4L8U0|A0A6A4L8U0_9ERIC	tr|A0A834HND6|A0A834HND6_RHOSS Protein kinase domain-containing protein OS=Rhododendron simsii OX=118357 GN=RHSIM_Rhsim02G0075300 PE=4 SV=1	NaN	24.1016	25.3997	37.273	72.173
tr|A0A834LIC4|A0A834LIC4_RHOSS;tr|A0A6A4LZT4|A0A6A4LZT4_9ERIC	tr|A0A834LIC4|A0A834LIC4_RHOSS Transketolase OS=Rhododendron simsii OX=118357 GN=RHSIM_Rhsim07G0028800 PE=3 SV=1;tr|A0A6A4LZT4|A0A6A4LZT4_9ERIC Transketolase (Fragment) OS=Rhododendron williamsianum OX=262921 GN=C3L33_08092 PE=3 SV=1	25.2116	25.545	NaN	80.175	71.834
tr|A0A6A4L444|A0A6A4L444_9ERIC;tr|A0A834HBC9|A0A834HBC9_RHOSS;tr|A0A834LQ17|A0A834LQ17_RHOSS;tr|A0A834L9X3|A0A834L9X3_RHOSS;tr|A0A834GVA6|A0A834GVA6_RHOSS	tr|A0A6A4L444|A0A6A4L444_9ERIC Uncharacterized protein (Fragment) OS=Rhododendron williamsianum OX=262921 GN=C3L33_15155 PE=3 SV=1;tr|A0A834HBC9|A0A834HBC9_RHOSS Uncharacterized protein OS=Rhododendron simsii OX=118357 GN=RHSIM_Rhsim02G0053400 PE=3 SV=1	NaN	NaN	24.2151	46.9	71.449
tr|A0A6A4LNT2|A0A6A4LNT2_9ERIC;tr|A0A834GKM5|A0A834GKM5_RHOSS;tr|A0A6A4MN10|A0A6A4MN10_9ERIC	tr|A0A6A4LNT2|A0A6A4LNT2_9ERIC PCI domain-containing protein (Fragment) OS=Rhododendron williamsianum OX=262921 GN=C3L33_11850 PE=4 SV=1;tr|A0A834GKM5|A0A834GKM5_RHOSS PCI domain-containing protein OS=Rhododendron simsii OX=118357 GN=RHSIM_Rhsim08G0185100	24.9233	NaN	NaN	44.32	70.849
tr|A0A6A4KG27|A0A6A4KG27_9ERIC;tr|A0A834G8B8|A0A834G8B8_RHOSS	tr|A0A6A4KG27|A0A6A4KG27_9ERIC Uncharacterized protein (Fragment) OS=Rhododendron williamsianum OX=262921 GN=C3L33_20790 PE=4 SV=1;tr|A0A834G8B8|A0A834G8B8_RHOSS Coatomer subunit alpha OS=Rhododendron simsii OX=118357 GN=RHSIM_Rhsim11G0182000 PE=4 SV=1	26.3161	26.7705	26.6679	139.95	69.616
tr|A0A6A4KFZ4|A0A6A4KFZ4_9ERIC	tr|A0A6A4KFZ4|A0A6A4KFZ4_9ERIC D-fructose-1,6-bisphosphate 1-phosphohydrolase (Fragment) OS=Rhododendron williamsianum OX=262921 GN=C3L33_21108 PE=3 SV=1	21.7543	NaN	21.264	43.319	67.513
tr|A0A834H854|A0A834H854_RHOSS;tr|A0A6A4LM55|A0A6A4LM55_9ERIC;tr|A0A834GXP6|A0A834GXP6_RHOSS;tr|A0A6A4KV13|A0A6A4KV13_9ERIC	tr|A0A834H854|A0A834H854_RHOSS Isocitrate dehydrogenase [NAD] subunit, mitochondrial OS=Rhododendron simsii OX=118357 GN=RHSIM_Rhsim04G0145600 PE=3 SV=1;tr|A0A6A4LM55|A0A6A4LM55_9ERIC Isocitrate dehydrogenase [NAD] subunit, mitochondrial (Fragment) OS=Rhod	26.5496	26.3026	27.2006	35.371	67.396
tr|A0A6A4LX36|A0A6A4LX36_9ERIC;tr|A0A6A4KPT1|A0A6A4KPT1_9ERIC;tr|A0A834LR25|A0A834LR25_RHOSS	tr|A0A6A4LX36|A0A6A4LX36_9ERIC E1 ubiquitin-activating enzyme (Fragment) OS=Rhododendron williamsianum OX=262921 GN=C3L33_07116 PE=3 SV=1	25.8188	25.8111	NaN	110.81	67.16
tr|A0A834G6X0|A0A834G6X0_RHOSS;tr|A0A6A4KCA0|A0A6A4KCA0_9ERIC	tr|A0A834G6X0|A0A834G6X0_RHOSS Tr-type G domain-containing protein OS=Rhododendron simsii OX=118357 GN=RHSIM_Rhsim11G0045300 PE=3 SV=1;tr|A0A6A4KCA0|A0A6A4KCA0_9ERIC Tr-type G domain-containing protein (Fragment) OS=Rhododendron williamsianum OX=262921 GN=	23.4904	NaN	NaN	94	65.737
tr|A0A6A4LS19|A0A6A4LS19_9ERIC;tr|A0A834L759|A0A834L759_RHOSS;tr|A0A834HHQ2|A0A834HHQ2_RHOSS;tr|A0A6A4MAY8|A0A6A4MAY8_9ERIC	tr|A0A6A4LS19|A0A6A4LS19_9ERIC Succinate-CoA ligase subunit beta (Fragment) OS=Rhododendron williamsianum OX=262921 GN=C3L33_07373 PE=3 SV=1;tr|A0A834L759|A0A834L759_RHOSS Succinate--CoA ligase [ADP-forming] subunit beta, mitochondrial OS=Rhododendron sims	26.9583	28.4608	26.8377	45.09	65.295
tr|A0A834L8C4|A0A834L8C4_RHOSS;tr|A0A6A4L8S1|A0A6A4L8S1_9ERIC;tr|A0A834L8Z4|A0A834L8Z4_RHOSS;tr|A0A6A4LBQ0|A0A6A4LBQ0_9ERIC	tr|A0A834L8C4|A0A834L8C4_RHOSS Leucyl-tRNA synthetase OS=Rhododendron simsii OX=118357 GN=RHSIM_Rhsim12G0137900 PE=3 SV=1;tr|A0A6A4L8S1|A0A6A4L8S1_9ERIC Leucyl-tRNA synthetase (Fragment) OS=Rhododendron williamsianum OX=262921 GN=C3L33_14152 PE=3 SV=1;tr|A	24.353	NaN	24.7309	146.35	64.115
tr|A0A834GI97|A0A834GI97_RHOSS	tr|A0A834GI97|A0A834GI97_RHOSS GDP-mannose 4,6-dehydratase OS=Rhododendron simsii OX=118357 GN=RHSIM_Rhsim08G0034400 PE=3 SV=1	25.3721	26.5133	NaN	41.741	62.199
tr|A0A834LQ21|A0A834LQ21_RHOSS;tr|A0A6A4KY08|A0A6A4KY08_9ERIC	tr|A0A834LQ21|A0A834LQ21_RHOSS Pyruvate decarboxylase OS=Rhododendron simsii OX=118357 GN=RHSIM_Rhsim05G0219500 PE=3 SV=1	25.4874	NaN	26.0117	68.165	62.153
tr|A0A834LHJ1|A0A834LHJ1_RHOSS;tr|A0A834LKV8|A0A834LKV8_RHOSS;tr|A0A834H0M4|A0A834H0M4_RHOSS;tr|A0A834GY02|A0A834GY02_RHOSS;tr|A0A6A4KXH7|A0A6A4KXH7_9ERIC;tr|A0A6A4LYQ5|A0A6A4LYQ5_9ERIC	tr|A0A834LHJ1|A0A834LHJ1_RHOSS Aldo_ket_red domain-containing protein OS=Rhododendron simsii OX=118357 GN=RHSIM_Rhsim08G0011000 PE=4 SV=1;tr|A0A834LKV8|A0A834LKV8_RHOSS Aldo_ket_red domain-containing protein OS=Rhododendron simsii OX=118357 GN=RHSIM_Rhsim0	25.371	NaN	25.2115	38.383	61.606
tr|A0A6A4MCL8|A0A6A4MCL8_9ERIC;tr|A0A834H767|A0A834H767_RHOSS	tr|A0A6A4MCL8|A0A6A4MCL8_9ERIC Tripeptidyl-peptidase II (Fragment) OS=Rhododendron williamsianum OX=262921 GN=C3L33_03223 PE=3 SV=1;tr|A0A834H767|A0A834H767_RHOSS Tripeptidyl-peptidase II OS=Rhododendron simsii OX=118357 GN=RHSIM_Rhsim03G0187200 PE=3 SV=1	25.4161	25.0396	23.7774	166.38	61.33
tr|A0A834H072|A0A834H072_RHOSS;tr|A0A834G7C1|A0A834G7C1_RHOSS;tr|A0A834G0R2|A0A834G0R2_RHOSS;tr|A0A6A4LKU9|A0A6A4LKU9_9ERIC	tr|A0A834H072|A0A834H072_RHOSS (S)-2-hydroxy-acid oxidase OS=Rhododendron simsii OX=118357 GN=RHSIM_Rhsim04G0033100 PE=3 SV=1;tr|A0A834G7C1|A0A834G7C1_RHOSS (S)-2-hydroxy-acid oxidase OS=Rhododendron simsii OX=118357 GN=RHSIM_Rhsim13G0114900 PE=3 SV=1;tr|A	26.0857	NaN	26.1772	40.367	61.07
tr|A0A6A4KZY5|A0A6A4KZY5_9ERIC;tr|A0A834LKA4|A0A834LKA4_RHOSS;tr|A0A6A4LIK3|A0A6A4LIK3_9ERIC;tr|A0A834LLH7|A0A834LLH7_RHOSS	tr|A0A6A4KZY5|A0A6A4KZY5_9ERIC D-3-phosphoglycerate dehydrogenase (Fragment) OS=Rhododendron williamsianum OX=262921 GN=C3L33_19635 PE=3 SV=1;tr|A0A834LKA4|A0A834LKA4_RHOSS D-3-phosphoglycerate dehydrogenase OS=Rhododendron simsii OX=118357 GN=RHSIM_Rhsim0	24.3789	23.342	NaN	62.297	61.06
tr|A0A6A4LYW7|A0A6A4LYW7_9ERIC	tr|A0A6A4LYW7|A0A6A4LYW7_9ERIC Ubiquitinyl hydrolase 1 (Fragment) OS=Rhododendron williamsianum OX=262921 GN=C3L33_04771 PE=3 SV=1	25.0433	NaN	24.8707	125.98	59.517
tr|A0A834HBW5|A0A834HBW5_RHOSS;tr|A0A834H3P5|A0A834H3P5_RHOSS;tr|A0A6A4L6P0|A0A6A4L6P0_9ERIC;tr|A0A6A4LBV2|A0A6A4LBV2_9ERIC	tr|A0A834HBW5|A0A834HBW5_RHOSS Dihydrolipoyl dehydrogenase OS=Rhododendron simsii OX=118357 GN=RHSIM_Rhsim02G0001500 PE=3 SV=1;tr|A0A834H3P5|A0A834H3P5_RHOSS Dihydrolipoyl dehydrogenase OS=Rhododendron simsii OX=118357 GN=RHSIM_Rhsim04G0244400 PE=3 SV=1;tr	23.6912	NaN	24.7601	54.425	59.132
tr|A0A834G7U9|A0A834G7U9_RHOSS;tr|A0A6A4LDF1|A0A6A4LDF1_9ERIC	tr|A0A834G7U9|A0A834G7U9_RHOSS Uncharacterized protein OS=Rhododendron simsii OX=118357 GN=RHSIM_Rhsim12G0209200 PE=4 SV=1;tr|A0A6A4LDF1|A0A6A4LDF1_9ERIC Uncharacterized protein (Fragment) OS=Rhododendron williamsianum OX=262921 GN=C3L33_14719 PE=4 SV=1	25.2431	NaN	22.4256	44.453	58.859
tr|A0A834GH00|A0A834GH00_RHOSS;tr|A0A834GMV5|A0A834GMV5_RHOSS;tr|A0A6A4M6H5|A0A6A4M6H5_9ERIC	tr|A0A834GH00|A0A834GH00_RHOSS Uncharacterized protein OS=Rhododendron simsii OX=118357 GN=RHSIM_Rhsim08G0006400 PE=4 SV=1;tr|A0A834GMV5|A0A834GMV5_RHOSS Uncharacterized protein OS=Rhododendron simsii OX=118357 GN=RHSIM_Rhsim08G0007100 PE=4 SV=1;tr|A0A6A4M	25.3823	24.8371	24.4191	45.907	56.695
tr|A0A834HF26|A0A834HF26_RHOSS;tr|A0A6A4M543|A0A6A4M543_9ERIC	tr|A0A834HF26|A0A834HF26_RHOSS Epimerase domain-containing protein OS=Rhododendron simsii OX=118357 GN=RHSIM_Rhsim01G0209500 PE=4 SV=1;tr|A0A6A4M543|A0A6A4M543_9ERIC Epimerase domain-containing protein (Fragment) OS=Rhododendron williamsianum OX=262921 GN=	NaN	NaN	25.8321	43.695	54.747
tr|A0A6A4LRB5|A0A6A4LRB5_9ERIC;tr|A0A834L6A4|A0A834L6A4_RHOSS;tr|A0A834HE51|A0A834HE51_RHOSS;tr|A0A6A4LB28|A0A6A4LB28_9ERIC	tr|A0A6A4LRB5|A0A6A4LRB5_9ERIC Elongation factor Tu (Fragment) OS=Rhododendron williamsianum OX=262921 GN=C3L33_07521 PE=3 SV=1;tr|A0A834L6A4|A0A834L6A4_RHOSS Elongation factor Tu OS=Rhododendron simsii OX=118357 GN=RHSIM_Rhsim13G0022100 PE=3 SV=1;tr|A0A83	NaN	25.6365	NaN	48.173	54.599
tr|A0A6A4MDB3|A0A6A4MDB3_9ERIC;tr|A0A834LSC8|A0A834LSC8_RHOSS	tr|A0A6A4MDB3|A0A6A4MDB3_9ERIC Uncharacterized protein (Fragment) OS=Rhododendron williamsianum OX=262921 GN=C3L33_02048 PE=3 SV=1;tr|A0A834LSC8|A0A834LSC8_RHOSS Uncharacterized protein OS=Rhododendron simsii OX=118357 GN=RHSIM_Rhsim03G0018900 PE=3 SV=1	NaN	NaN	26.0111	31.91	54.382
tr|A0A6A4MQU4|A0A6A4MQU4_9ERIC;tr|A0A834LDU1|A0A834LDU1_RHOSS	tr|A0A6A4MQU4|A0A6A4MQU4_9ERIC 1-deoxy-D-xylulose-5-phosphate reductoisomerase (Fragment) OS=Rhododendron williamsianum OX=262921 GN=C3L33_00701 PE=3 SV=1;tr|A0A834LDU1|A0A834LDU1_RHOSS 1-deoxy-D-xylulose-5-phosphate reductoisomerase OS=Rhododendron simsii	NaN	NaN	22.9887	42.845	53.839
tr|A0A834H566|A0A834H566_RHOSS	tr|A0A834H566|A0A834H566_RHOSS ABC1 domain-containing protein OS=Rhododendron simsii OX=118357 GN=RHSIM_Rhsim06G0177200 PE=4 SV=1	24.1986	24.1815	NaN	88.608	52.15
tr|A0A834GPC0|A0A834GPC0_RHOSS;tr|A0A6A4LGZ9|A0A6A4LGZ9_9ERIC;tr|A0A6A4LVQ4|A0A6A4LVQ4_9ERIC	tr|A0A834GPC0|A0A834GPC0_RHOSS SERPIN domain-containing protein OS=Rhododendron simsii OX=118357 GN=RHSIM_Rhsim07G0233000 PE=3 SV=1;tr|A0A6A4LGZ9|A0A6A4LGZ9_9ERIC SERPIN domain-containing protein (Fragment) OS=Rhododendron williamsianum OX=262921 GN=C3L33_	25.1328	25.071	24.8108	41.666	50.687
tr|A0A834G5B1|A0A834G5B1_RHOSS;tr|A0A6A4KTY4|A0A6A4KTY4_9ERIC	tr|A0A834G5B1|A0A834G5B1_RHOSS Uncharacterized protein OS=Rhododendron simsii OX=118357 GN=RHSIM_Rhsim11G0034700 PE=3 SV=1;tr|A0A6A4KTY4|A0A6A4KTY4_9ERIC Uncharacterized protein (Fragment) OS=Rhododendron williamsianum OX=262921 GN=C3L33_21838 PE=3 SV=1	25.8882	25.7148	25.3629	131.31	48.384
tr|A0A6A4M5X0|A0A6A4M5X0_9ERIC;tr|A0A834HHP5|A0A834HHP5_RHOSS	tr|A0A6A4M5X0|A0A6A4M5X0_9ERIC E1 ubiquitin-activating enzyme (Fragment) OS=Rhododendron williamsianum OX=262921 GN=C3L33_04471 PE=3 SV=1;tr|A0A834HHP5|A0A834HHP5_RHOSS E1 ubiquitin-activating enzyme OS=Rhododendron simsii OX=118357 GN=RHSIM_Rhsim01G023990	25.2097	24.3692	NaN	126.51	47.628
tr|A0A834H350|A0A834H350_RHOSS	tr|A0A834H350|A0A834H350_RHOSS Aminotran_1_2 domain-containing protein OS=Rhododendron simsii OX=118357 GN=RHSIM_Rhsim04G0022700 PE=3 SV=1	NaN	NaN	23.0157	46.548	47.112
tr|A0A834L8T3|A0A834L8T3_RHOSS;tr|A0A834G2Z5|A0A834G2Z5_RHOSS	tr|A0A834L8T3|A0A834L8T3_RHOSS PKS_ER domain-containing protein OS=Rhododendron simsii OX=118357 GN=RHSIM_Rhsim12G0008600 PE=3 SV=1;tr|A0A834G2Z5|A0A834G2Z5_RHOSS Uncharacterized protein OS=Rhododendron simsii OX=118357 GN=RHSIM_Rhsim12G0008800 PE=4 SV=1	NaN	NaN	24.4829	71.031	46.515
tr|A0A6A4LEJ2|A0A6A4LEJ2_9ERIC;tr|A0A834G5N0|A0A834G5N0_RHOSS;tr|A0A6A4L4R6|A0A6A4L4R6_9ERIC;tr|A0A834G0F1|A0A834G0F1_RHOSS	tr|A0A6A4LEJ2|A0A6A4LEJ2_9ERIC ARMT1-like_dom domain-containing protein (Fragment) OS=Rhododendron williamsianum OX=262921 GN=C3L33_14354 PE=3 SV=1;tr|A0A834G5N0|A0A834G5N0_RHOSS Pantothenate kinase 2 OS=Rhododendron simsii OX=118357 GN=RHSIM_Rhsim12G01647	24.0661	24.2689	NaN	94.312	45.934
tr|A0A6A4L5S1|A0A6A4L5S1_9ERIC;tr|A0A834HA09|A0A834HA09_RHOSS	tr|A0A6A4L5S1|A0A6A4L5S1_9ERIC RPN2_C domain-containing protein (Fragment) OS=Rhododendron williamsianum OX=262921 GN=C3L33_15170 PE=3 SV=1;tr|A0A834HA09|A0A834HA09_RHOSS 26S proteasome non-ATPase regulatory subunit 1 homolog OS=Rhododendron simsii OX=1183	25.6732	NaN	25.6418	96.206	45.23
tr|A0A834GFN9|A0A834GFN9_RHOSS;tr|A0A834GBM9|A0A834GBM9_RHOSS;tr|A0A834G9Z0|A0A834G9Z0_RHOSS;tr|A0A834GYP7|A0A834GYP7_RHOSS;tr|A0A834GHS5|A0A834GHS5_RHOSS;tr|A0A6A4KR36|A0A6A4KR36_9ERIC;tr|A0A6A4L1F1|A0A6A4L1F1_9ERIC	tr|A0A834GFN9|A0A834GFN9_RHOSS PKS_ER domain-containing protein OS=Rhododendron simsii OX=118357 GN=RHSIM_Rhsim10G0174500 PE=3 SV=1;tr|A0A834GBM9|A0A834GBM9_RHOSS PKS_ER domain-containing protein OS=Rhododendron simsii OX=118357 GN=RHSIM_Rhsim10G0174300 PE	26.5973	27.2445	29.341	39.041	44.971
tr|A0A834LDB5|A0A834LDB5_RHOSS;tr|A0A6A4LHE6|A0A6A4LHE6_9ERIC	tr|A0A834LDB5|A0A834LDB5_RHOSS Gal_mutarotas_2 domain-containing protein OS=Rhododendron simsii OX=118357 GN=RHSIM_Rhsim10G0127500 PE=3 SV=1;tr|A0A6A4LHE6|A0A6A4LHE6_9ERIC Gal_mutarotas_2 domain-containing protein (Fragment) OS=Rhododendron williamsianum O	24.4456	23.67	NaN	106.26	44.751
tr|A0A6A4LED2|A0A6A4LED2_9ERIC;tr|A0A6A4LDT9|A0A6A4LDT9_9ERIC;tr|A0A6B9S3J1|A0A6B9S3J1_9ERIC;tr|A0A6B9S1Q9|A0A6B9S1Q9_9ERIC;tr|A0A2Z5TVQ4|A0A2Z5TVQ4_KALPR;tr|A0A2Z5TVH2|A0A2Z5TVH2_KALPR;tr|C8ZLJ5|C8ZLJ5_RHOSS	tr|A0A6A4LED2|A0A6A4LED2_9ERIC Gp_dh_N domain-containing protein (Fragment) OS=Rhododendron williamsianum OX=262921 GN=C3L33_14436 PE=3 SV=1;tr|A0A6A4LDT9|A0A6A4LDT9_9ERIC Gp_dh_N domain-containing protein (Fragment) OS=Rhododendron williamsianum OX=262921	27.957	28.0936	27.8121	33.081	44.64
tr|A0A834HFM0|A0A834HFM0_RHOSS	tr|A0A834HFM0|A0A834HFM0_RHOSS Uncharacterized protein OS=Rhododendron simsii OX=118357 GN=RHSIM_Rhsim01G0263100 PE=3 SV=1	23.4526	NaN	NaN	52.22	44.08
tr|A0A834HJL6|A0A834HJL6_RHOSS;tr|A0A6A4LVT2|A0A6A4LVT2_9ERIC	tr|A0A834HJL6|A0A834HJL6_RHOSS Serine/threonine-protein phosphatase OS=Rhododendron simsii OX=118357 GN=RHSIM_Rhsim01G0200700 PE=3 SV=1;tr|A0A6A4LVT2|A0A6A4LVT2_9ERIC Serine/threonine-protein phosphatase (Fragment) OS=Rhododendron williamsianum OX=262921 G	24.2421	NaN	24.2807	110.75	43.996
tr|A0A834G7G5|A0A834G7G5_RHOSS	tr|A0A834G7G5|A0A834G7G5_RHOSS Carboxypeptidase OS=Rhododendron simsii OX=118357 GN=RHSIM_Rhsim11G0168200 PE=3 SV=1	24.5003	NaN	24.3524	52.639	43.476
tr|A0A834LHP7|A0A834LHP7_RHOSS	tr|A0A834LHP7|A0A834LHP7_RHOSS Uncharacterized protein OS=Rhododendron simsii OX=118357 GN=RHSIM_Rhsim07G0093000 PE=4 SV=1	25.4245	NaN	NaN	24.095	42.028
tr|A0A6A4LMQ1|A0A6A4LMQ1_9ERIC;tr|A0A834GVF1|A0A834GVF1_RHOSS	tr|A0A6A4LMQ1|A0A6A4LMQ1_9ERIC Uncharacterized protein (Fragment) OS=Rhododendron williamsianum OX=262921 GN=C3L33_10407 PE=3 SV=1;tr|A0A834GVF1|A0A834GVF1_RHOSS 26S proteasome non-ATPase regulatory subunit 2 homolog OS=Rhododendron simsii OX=118357 GN=RHS	24.0098	23.9514	NaN	90.613	41.953
tr|A0A834H743|A0A834H743_RHOSS;tr|A0A6A4LLM8|A0A6A4LLM8_9ERIC;tr|A0A2H4KDN8|A0A2H4KDN8_RHOFO	tr|A0A834H743|A0A834H743_RHOSS Glutamine synthetase OS=Rhododendron simsii OX=118357 GN=RHSIM_Rhsim04G0209400 PE=3 SV=1;tr|A0A6A4LLM8|A0A6A4LLM8_9ERIC Glutamine synthetase (Fragment) OS=Rhododendron williamsianum OX=262921 GN=C3L33_12780 PE=3 SV=1	25.3425	25.415	23.9594	49.919	41.591
tr|A0A834HCB8|A0A834HCB8_RHOSS	tr|A0A834HCB8|A0A834HCB8_RHOSS Aldo_ket_red domain-containing protein OS=Rhododendron simsii OX=118357 GN=RHSIM_Rhsim02G0056400 PE=4 SV=1	NaN	NaN	23.9427	45.249	40.974
tr|A0A834GBR4|A0A834GBR4_RHOSS	tr|A0A834GBR4|A0A834GBR4_RHOSS Uncharacterized protein OS=Rhododendron simsii OX=118357 GN=RHSIM_Rhsim11G0173300 PE=4 SV=1	NaN	24.0638	NaN	83.957	40.701
tr|A0A834LQF7|A0A834LQF7_RHOSS;tr|A0A6A4LBW2|A0A6A4LBW2_9ERIC;tr|A0A6A4L499|A0A6A4L499_9ERIC;tr|A0A834LSY3|A0A834LSY3_RHOSS;tr|A0A6A4LW85|A0A6A4LW85_9ERIC;tr|A0A834GKZ3|A0A834GKZ3_RHOSS;tr|A0A6A4LC76|A0A6A4LC76_9ERIC;tr|A0A834FZU5|A0A834FZU5_RHOSS;tr|A0A6A4M3K6|A0A6A4M3K6_9ERIC	tr|A0A834LQF7|A0A834LQF7_RHOSS Protein kinase domain-containing protein OS=Rhododendron simsii OX=118357 GN=RHSIM_Rhsim04G0247700 PE=3 SV=1;tr|A0A6A4LBW2|A0A6A4LBW2_9ERIC Protein kinase domain-containing protein (Fragment) OS=Rhododendron williamsianum OX=	NaN	NaN	25.2073	41.74	40.612
tr|A0A834LME0|A0A834LME0_RHOSS;tr|A0A834H588|A0A834H588_RHOSS;tr|A0A6A4M2J9|A0A6A4M2J9_9ERIC;tr|A0A6A4L0Z4|A0A6A4L0Z4_9ERIC	tr|A0A834LME0|A0A834LME0_RHOSS KH type-2 domain-containing protein OS=Rhododendron simsii OX=118357 GN=RHSIM_Rhsim05G0012000 PE=3 SV=1;tr|A0A834H588|A0A834H588_RHOSS KH type-2 domain-containing protein OS=Rhododendron simsii OX=118357 GN=RHSIM_Rhsim03G0229	24.5111	24.9619	NaN	26.845	40.609
tr|A0A834H5V6|A0A834H5V6_RHOSS;tr|A0A6A4LI97|A0A6A4LI97_9ERIC;tr|A0A6A4LA76|A0A6A4LA76_9ERIC;tr|A0A834H5E2|A0A834H5E2_RHOSS	tr|A0A834H5V6|A0A834H5V6_RHOSS Uncharacterized protein OS=Rhododendron simsii OX=118357 GN=RHSIM_Rhsim04G0038100 PE=4 SV=1;tr|A0A6A4LI97|A0A6A4LI97_9ERIC Uncharacterized protein (Fragment) OS=Rhododendron williamsianum OX=262921 GN=C3L33_10650 PE=4 SV=1	NaN	24.3235	24.6443	44.31	39.549
tr|A0A834G1M8|A0A834G1M8_RHOSS;tr|A0A6A4LBV9|A0A6A4LBV9_9ERIC;tr|A0A834LM92|A0A834LM92_RHOSS	tr|A0A834G1M8|A0A834G1M8_RHOSS Uncharacterized protein OS=Rhododendron simsii OX=118357 GN=RHSIM_Rhsim12G0195700 PE=3 SV=1;tr|A0A6A4LBV9|A0A6A4LBV9_9ERIC Aminotran_1_2 domain-containing protein (Fragment) OS=Rhododendron williamsianum OX=262921 GN=C3L33_14	NaN	NaN	25.7127	49.828	39.433
tr|A0A6A4L8Y7|A0A6A4L8Y7_9ERIC;tr|A0A834L8H1|A0A834L8H1_RHOSS	tr|A0A6A4L8Y7|A0A6A4L8Y7_9ERIC Transaldolase (Fragment) OS=Rhododendron williamsianum OX=262921 GN=C3L33_13294 PE=3 SV=1;tr|A0A834L8H1|A0A834L8H1_RHOSS Transaldolase OS=Rhododendron simsii OX=118357 GN=RHSIM_Rhsim12G0017100 PE=3 SV=1	25.2577	25.5366	25.6129	48.168	39.227
tr|A0A834FZN3|A0A834FZN3_RHOSS;tr|A0A6A4LS46|A0A6A4LS46_9ERIC;tr|A0A6A4LMI9|A0A6A4LMI9_9ERIC;tr|A0A6A4L108|A0A6A4L108_9ERIC;tr|A0A6A4L2F5|A0A6A4L2F5_9ERIC;tr|A0A834GEK4|A0A834GEK4_RHOSS;tr|A0A834HD74|A0A834HD74_RHOSS;tr|A0A834GND4|A0A834GND4_RHOSS	tr|A0A834FZN3|A0A834FZN3_RHOSS AAA domain-containing protein OS=Rhododendron simsii OX=118357 GN=RHSIM_Rhsim13G0058000 PE=3 SV=1;tr|A0A6A4LS46|A0A6A4LS46_9ERIC AAA domain-containing protein (Fragment) OS=Rhododendron williamsianum OX=262921 GN=C3L33_07188	20.5221	NaN	NaN	49.853	37.252
tr|A0A834HIS1|A0A834HIS1_RHOSS;tr|A0A834HI73|A0A834HI73_RHOSS;tr|A0A834LQQ6|A0A834LQQ6_RHOSS;tr|A0A834FUE4|A0A834FUE4_RHOSS;tr|A0A6A4M4L7|A0A6A4M4L7_9ERIC	tr|A0A834HIS1|A0A834HIS1_RHOSS CYTOSOL_AP domain-containing protein OS=Rhododendron simsii OX=118357 GN=RHSIM_Rhsim01G0033300 PE=3 SV=1;tr|A0A834HI73|A0A834HI73_RHOSS CYTOSOL_AP domain-containing protein OS=Rhododendron simsii OX=118357 GN=RHSIM_Rhsim01G00	23.9958	NaN	23.7849	55.095	36.031
tr|A0A6A4MBK3|A0A6A4MBK3_9ERIC;tr|A0A834HAE4|A0A834HAE4_RHOSS	tr|A0A6A4MBK3|A0A6A4MBK3_9ERIC Oxidored_FMN domain-containing protein (Fragment) OS=Rhododendron williamsianum OX=262921 GN=C3L33_03523 PE=3 SV=1;tr|A0A834HAE4|A0A834HAE4_RHOSS Oxidored_FMN domain-containing protein OS=Rhododendron simsii OX=118357 GN=RHSI	NaN	22.1705	NaN	42.958	35.092
tr|A0A6A4KEI2|A0A6A4KEI2_9ERIC;tr|A0A834GYW9|A0A834GYW9_RHOSS;tr|A0A6A4L036|A0A6A4L036_9ERIC	tr|A0A6A4KEI2|A0A6A4KEI2_9ERIC Protein kinase domain-containing protein (Fragment) OS=Rhododendron williamsianum OX=262921 GN=C3L33_21226 PE=3 SV=1	NaN	NaN	24.7268	34.081	34.99
tr|A0A834G3V1|A0A834G3V1_RHOSS;tr|A0A6A4L301|A0A6A4L301_9ERIC;tr|A0A6A4MMA9|A0A6A4MMA9_9ERIC;tr|A0A834GLZ6|A0A834GLZ6_RHOSS	tr|A0A834G3V1|A0A834G3V1_RHOSS Aldedh domain-containing protein OS=Rhododendron simsii OX=118357 GN=RHSIM_Rhsim12G0047500 PE=3 SV=1;tr|A0A6A4L301|A0A6A4L301_9ERIC Aldedh domain-containing protein (Fragment) OS=Rhododendron williamsianum OX=262921 GN=C3L33_	25.8709	26.4017	25.7277	55.174	34.687
tr|A0A834L639|A0A834L639_RHOSS;tr|A0A6A4LWF1|A0A6A4LWF1_9ERIC	tr|A0A834L639|A0A834L639_RHOSS Pyruvate kinase OS=Rhododendron simsii OX=118357 GN=RHSIM_Rhsim13G0234600 PE=3 SV=1;tr|A0A6A4LWF1|A0A6A4LWF1_9ERIC Pyruvate kinase (Fragment) OS=Rhododendron williamsianum OX=262921 GN=C3L33_05734 PE=3 SV=1	24.855	25.2109	24.6641	53.866	34.54
tr|A0A834GJ02|A0A834GJ02_RHOSS	tr|A0A834GJ02|A0A834GJ02_RHOSS PKS_ER domain-containing protein OS=Rhododendron simsii OX=118357 GN=RHSIM_Rhsim09G0052100 PE=4 SV=1	NaN	26.6732	26.3509	60.227	33.435
tr|Q71N69|Q71N69_PHYCU	tr|Q71N69|Q71N69_PHYCU Ribulose bisphosphate carboxylase large chain (Fragment) OS=Phyllodoce caerulea OX=49155 GN=rbcL PE=3 SV=1	24.4001	NaN	NaN	46.998	33.261
tr|A0A834GX72|A0A834GX72_RHOSS;tr|A0A6A4KSA9|A0A6A4KSA9_9ERIC	tr|A0A834GX72|A0A834GX72_RHOSS Uncharacterized protein OS=Rhododendron simsii OX=118357 GN=RHSIM_Rhsim05G0056500 PE=3 SV=1	25.8898	NaN	25.8287	42.602	32.63
tr|A0A834L673|A0A834L673_RHOSS	tr|A0A834L673|A0A834L673_RHOSS Uncharacterized protein OS=Rhododendron simsii OX=118357 GN=RHSIM_Rhsim13G0035100 PE=3 SV=1	31.5072	31.6244	31.5878	54.436	32.279
tr|A0A6A4M0Y1|A0A6A4M0Y1_9ERIC;tr|A0A834LGR3|A0A834LGR3_RHOSS	tr|A0A6A4M0Y1|A0A6A4M0Y1_9ERIC Uncharacterized protein (Fragment) OS=Rhododendron williamsianum OX=262921 GN=C3L33_07848 PE=4 SV=1;tr|A0A834LGR3|A0A834LGR3_RHOSS Uncharacterized protein OS=Rhododendron simsii OX=118357 GN=RHSIM_Rhsim07G0002300 PE=4 SV=1	24.4383	24.0682	NaN	116.86	31.871
tr|A0A834GK42|A0A834GK42_RHOSS;tr|A0A6A4MQW6|A0A6A4MQW6_9ERIC	tr|A0A834GK42|A0A834GK42_RHOSS V-type proton ATPase subunit C OS=Rhododendron simsii OX=118357 GN=RHSIM_Rhsim08G0195300 PE=3 SV=1;tr|A0A6A4MQW6|A0A6A4MQW6_9ERIC V-type proton ATPase subunit C (Fragment) OS=Rhododendron williamsianum OX=262921 GN=C3L33_0049	NaN	NaN	25.815	52.043	31.05
tr|A0A6A4MN12|A0A6A4MN12_9ERIC;tr|A0A6A4KSK6|A0A6A4KSK6_9ERIC;tr|A0A834GPD8|A0A834GPD8_RHOSS;tr|A0A6A4MLD0|A0A6A4MLD0_9ERIC;tr|A0A834LQA4|A0A834LQA4_RHOSS;tr|A0A834LH56|A0A834LH56_RHOSS;tr|A0A834GAY0|A0A834GAY0_RHOSS;tr|A0A834G2T6|A0A834G2T6_RHOSS;tr|A0A6A4M135|A0A6A4M135_9ERIC;tr|A0A6A4LYH5|A0A6A4LYH5_9ERIC;tr|A0A6A4L275|A0A6A4L275_9ERIC;tr|A0A834HIN5|A0A834HIN5_RHOSS	tr|A0A6A4MN12|A0A6A4MN12_9ERIC Uncharacterized protein (Fragment) OS=Rhododendron williamsianum OX=262921 GN=C3L33_01342 PE=3 SV=1;tr|A0A6A4KSK6|A0A6A4KSK6_9ERIC Tubulin_C domain-containing protein (Fragment) OS=Rhododendron williamsianum OX=262921 GN=C3L3	NaN	25.7119	NaN	38.933	30.819
tr|A0A834LB94|A0A834LB94_RHOSS	tr|A0A834LB94|A0A834LB94_RHOSS PKS_ER domain-containing protein OS=Rhododendron simsii OX=118357 GN=RHSIM_Rhsim11G0160000 PE=4 SV=1	NaN	NaN	24.7373	37.793	30.187
tr|A0A6A4L448|A0A6A4L448_9ERIC	tr|A0A6A4L448|A0A6A4L448_9ERIC Methylenetetrahydrofolate reductase (Fragment) OS=Rhododendron williamsianum OX=262921 GN=C3L33_17583 PE=3 SV=1	23.7118	NaN	NaN	66.877	30.186
tr|A0A834LXF4|A0A834LXF4_RHOSS;tr|A0A6A4LRL3|A0A6A4LRL3_9ERIC;tr|A0A834HIV1|A0A834HIV1_RHOSS;tr|A0A834FYA1|A0A834FYA1_RHOSS	tr|A0A834LXF4|A0A834LXF4_RHOSS Uncharacterized protein OS=Rhododendron simsii OX=118357 GN=RHSIM_Rhsim01G0235200 PE=4 SV=1;tr|A0A6A4LRL3|A0A6A4LRL3_9ERIC Uncharacterized protein (Fragment) OS=Rhododendron williamsianum OX=262921 GN=C3L33_04511 PE=4 SV=1;tr	24.9754	NaN	NaN	66.356	29.642
tr|A0A6A4KIP1|A0A6A4KIP1_9ERIC;tr|A0A6A4M1E0|A0A6A4M1E0_9ERIC	tr|A0A6A4KIP1|A0A6A4KIP1_9ERIC Uncharacterized protein (Fragment) OS=Rhododendron williamsianum OX=262921 GN=C3L33_22096 PE=4 SV=1;tr|A0A6A4M1E0|A0A6A4M1E0_9ERIC Uncharacterized protein (Fragment) OS=Rhododendron williamsianum OX=262921 GN=C3L33_03932 PE=4	24.8753	24.8382	25.1097	44.804	29.544
tr|A0A834HFD1|A0A834HFD1_RHOSS;tr|A0A6A4LRG3|A0A6A4LRG3_9ERIC	tr|A0A834HFD1|A0A834HFD1_RHOSS Uncharacterized protein OS=Rhododendron simsii OX=118357 GN=RHSIM_Rhsim01G0224200 PE=3 SV=1;tr|A0A6A4LRG3|A0A6A4LRG3_9ERIC Uncharacterized protein (Fragment) OS=Rhododendron williamsianum OX=262921 GN=C3L33_04588 PE=3 SV=1	27.1023	26.7788	26.7187	38.461	28.883
tr|A0A834H6I3|A0A834H6I3_RHOSS;tr|A0A6A4M1J8|A0A6A4M1J8_9ERIC;tr|A0A834GD83|A0A834GD83_RHOSS;tr|A0A6A4L5B6|A0A6A4L5B6_9ERIC	tr|A0A834H6I3|A0A834H6I3_RHOSS Mannose-1-phosphate guanylyltransferase OS=Rhododendron simsii OX=118357 GN=RHSIM_Rhsim03G0136400 PE=4 SV=1;tr|A0A6A4M1J8|A0A6A4M1J8_9ERIC Mannose-1-phosphate guanylyltransferase (Fragment) OS=Rhododendron williamsianum OX=26	23.3955	NaN	22.8345	39.607	27.783
tr|A0A6A4M0P7|A0A6A4M0P7_9ERIC;tr|A0A834H033|A0A834H033_RHOSS	tr|A0A6A4M0P7|A0A6A4M0P7_9ERIC Alpha-aminoacylpeptide hydrolase (Fragment) OS=Rhododendron williamsianum OX=262921 GN=C3L33_07779 PE=3 SV=1;tr|A0A834H033|A0A834H033_RHOSS Aminopeptidase OS=Rhododendron simsii OX=118357 GN=RHSIM_Rhsim07G0175300 PE=3 SV=1	25.2182	NaN	NaN	80.327	27.585
tr|A0A6A4LAP9|A0A6A4LAP9_9ERIC;tr|A0A834H071|A0A834H071_RHOSS;tr|A0A834LWK0|A0A834LWK0_RHOSS;tr|A0A6A4KZ53|A0A6A4KZ53_9ERIC	tr|A0A6A4LAP9|A0A6A4LAP9_9ERIC Uncharacterized protein (Fragment) OS=Rhododendron williamsianum OX=262921 GN=C3L33_12714 PE=3 SV=1;tr|A0A834H071|A0A834H071_RHOSS 40S ribosomal protein S3a OS=Rhododendron simsii OX=118357 GN=RHSIM_Rhsim04G0199100 PE=3 SV=1;	25.6652	24.3268	NaN	33.314	27.188
tr|A0A6A4MK40|A0A6A4MK40_9ERIC	tr|A0A6A4MK40|A0A6A4MK40_9ERIC HP domain-containing protein (Fragment) OS=Rhododendron williamsianum OX=262921 GN=C3L33_02037 PE=4 SV=1	24.3946	23.3998	24.2951	57.811	27.003
tr|A0A0A7NXC7|A0A0A7NXC7_9ERIC	tr|A0A0A7NXC7|A0A0A7NXC7_9ERIC Ribulose bisphosphate carboxylase large chain (Fragment) OS=Erica vagans OX=270446 GN=rbcL PE=3 SV=1	23.1267	NaN	NaN	43.041	26.801
tr|A0A834G2M6|A0A834G2M6_RHOSS	tr|A0A834G2M6|A0A834G2M6_RHOSS Amidohydro-rel domain-containing protein OS=Rhododendron simsii OX=118357 GN=RHSIM_Rhsim13G0210400 PE=4 SV=1	26.2443	NaN	NaN	23.672	26.736
tr|A0A6A4LP41|A0A6A4LP41_9ERIC;tr|A0A6A4L3Y0|A0A6A4L3Y0_9ERIC;tr|A0A834HKE2|A0A834HKE2_RHOSS;tr|A0A6A4L960|A0A6A4L960_9ERIC;tr|A0A834HEF8|A0A834HEF8_RHOSS	tr|A0A6A4LP41|A0A6A4LP41_9ERIC Sucrose-phosphate synthase (Fragment) OS=Rhododendron williamsianum OX=262921 GN=C3L33_05417 PE=3 SV=1;tr|A0A6A4L3Y0|A0A6A4L3Y0_9ERIC Sucrose-phosphate synthase (Fragment) OS=Rhododendron williamsianum OX=262921 GN=C3L33_1591	25.0749	25.3028	NaN	105.71	26.054
tr|A0A834GLC4|A0A834GLC4_RHOSS;tr|A0A6A4M080|A0A6A4M080_9ERIC;tr|A0A6A4KPS1|A0A6A4KPS1_9ERIC;tr|A0A6A4KV31|A0A6A4KV31_9ERIC;tr|A0A834G954|A0A834G954_RHOSS;tr|A0A834GBM5|A0A834GBM5_RHOSS	tr|A0A834GLC4|A0A834GLC4_RHOSS Pro-apoptotic serine protease NMA111 OS=Rhododendron simsii OX=118357 GN=RHSIM_Rhsim08G0086100 PE=3 SV=1;tr|A0A6A4M080|A0A6A4M080_9ERIC Pro-apoptotic serine protease NMA111 (Fragment) OS=Rhododendron williamsianum OX=262921 G	24.4196	24.3712	24.605	127.49	26.043
tr|A0A6A4MFQ9|A0A6A4MFQ9_9ERIC	tr|A0A6A4MFQ9|A0A6A4MFQ9_9ERIC PCI domain-containing protein (Fragment) OS=Rhododendron williamsianum OX=262921 GN=C3L33_01459 PE=3 SV=1	NaN	25.5852	NaN	52.258	24.285
tr|A0A834HCF4|A0A834HCF4_RHOSS;tr|A0A6A4L6M8|A0A6A4L6M8_9ERIC;tr|A0A6A4L4B1|A0A6A4L4B1_9ERIC;tr|A0A834GFH2|A0A834GFH2_RHOSS	tr|A0A834HCF4|A0A834HCF4_RHOSS 6-phosphogluconate dehydrogenase, decarboxylating OS=Rhododendron simsii OX=118357 GN=RHSIM_Rhsim02G0239600 PE=3 SV=1;tr|A0A6A4L6M8|A0A6A4L6M8_9ERIC 6-phosphogluconate dehydrogenase, decarboxylating (Fragment) OS=Rhododendron	23.3964	NaN	NaN	52.467	24.074
tr|A0A834HIN3|A0A834HIN3_RHOSS;tr|A0A834HCM8|A0A834HCM8_RHOSS;tr|A0A6A4M1A2|A0A6A4M1A2_9ERIC	tr|A0A834HIN3|A0A834HIN3_RHOSS Proline--tRNA ligase OS=Rhododendron simsii OX=118357 GN=RHSIM_Rhsim01G0000400 PE=3 SV=1;tr|A0A834HCM8|A0A834HCM8_RHOSS Prolyl-tRNA synthetase OS=Rhododendron simsii OX=118357 GN=RHSIM_Rhsim02G0055200 PE=4 SV=1;tr|A0A6A4M1A2|	21.8279	NaN	22.6347	69.294	23.043
tr|A0A834GVD2|A0A834GVD2_RHOSS;tr|A0A6A4LBV7|A0A6A4LBV7_9ERIC	tr|A0A834GVD2|A0A834GVD2_RHOSS Dolichyl-diphosphooligosaccharide--protein glycosyltransferase subunit 1 OS=Rhododendron simsii OX=118357 GN=RHSIM_Rhsim06G0004300 PE=3 SV=1	23.3106	NaN	NaN	68.631	22.96
tr|A0A6A4LFB0|A0A6A4LFB0_9ERIC;tr|A0A834LJD1|A0A834LJD1_RHOSS	tr|A0A6A4LFB0|A0A6A4LFB0_9ERIC Glucose-6-phosphate isomerase (Fragment) OS=Rhododendron williamsianum OX=262921 GN=C3L33_11042 PE=3 SV=1;tr|A0A834LJD1|A0A834LJD1_RHOSS Glucose-6-phosphate isomerase OS=Rhododendron simsii OX=118357 GN=RHSIM_Rhsim06G0034400	22.2117	NaN	NaN	54.167	22.896
tr|A0A834HB70|A0A834HB70_RHOSS;tr|A0A6A4KWN5|A0A6A4KWN5_9ERIC	tr|A0A834HB70|A0A834HB70_RHOSS PKS_ER domain-containing protein OS=Rhododendron simsii OX=118357 GN=RHSIM_Rhsim02G0255500 PE=3 SV=1;tr|A0A6A4KWN5|A0A6A4KWN5_9ERIC PKS_ER domain-containing protein (Fragment) OS=Rhododendron williamsianum OX=262921 GN=C3L33_	NaN	NaN	24.2686	42.883	22.396
tr|A0A6A4KXE4|A0A6A4KXE4_9ERIC;tr|A0A834GIW6|A0A834GIW6_RHOSS	tr|A0A6A4KXE4|A0A6A4KXE4_9ERIC Uncharacterized protein (Fragment) OS=Rhododendron williamsianum OX=262921 GN=C3L33_17740 PE=3 SV=1;tr|A0A834GIW6|A0A834GIW6_RHOSS V-type proton ATPase subunit OS=Rhododendron simsii OX=118357 GN=RHSIM_Rhsim09G0146300 PE=3 SV	NaN	24.4611	25.1958	29.242	21.923
tr|A0A6A4L1K3|A0A6A4L1K3_9ERIC;tr|A0A834GFK9|A0A834GFK9_RHOSS;tr|K0GF22|K0GF22_9ERIC;tr|A0A834GCE0|A0A834GCE0_RHOSS;tr|A0A834LEC9|A0A834LEC9_RHOSS;tr|A0A834H3W9|A0A834H3W9_RHOSS	tr|A0A6A4L1K3|A0A6A4L1K3_9ERIC Beta-fructofuranosidase (Fragment) OS=Rhododendron williamsianum OX=262921 GN=C3L33_16481 PE=3 SV=1;tr|A0A834GFK9|A0A834GFK9_RHOSS Beta-fructofuranosidase OS=Rhododendron simsii OX=118357 GN=RHSIM_Rhsim09G0191800 PE=3 SV=1;tr	26.3167	NaN	26.1824	60.885	21.447
tr|A0A834GUU7|A0A834GUU7_RHOSS;tr|A0A6A4LQQ3|A0A6A4LQQ3_9ERIC	tr|A0A834GUU7|A0A834GUU7_RHOSS TIP120 domain-containing protein OS=Rhododendron simsii OX=118357 GN=RHSIM_Rhsim05G0115300 PE=3 SV=1	24.2831	24.4538	NaN	153.34	20.776
tr|A0A834HG80|A0A834HG80_RHOSS;tr|A0A6A4KZS3|A0A6A4KZS3_9ERIC	tr|A0A834HG80|A0A834HG80_RHOSS Methyltransferase OS=Rhododendron simsii OX=118357 GN=RHSIM_Rhsim02G0040300 PE=3 SV=1;tr|A0A6A4KZS3|A0A6A4KZS3_9ERIC Methyltransferase (Fragment) OS=Rhododendron williamsianum OX=262921 GN=C3L33_15078 PE=3 SV=1	23.7406	24.0353	NaN	70.291	20.548
tr|A0A6A4KFW9|A0A6A4KFW9_9ERIC;tr|A0A6A4M8I4|A0A6A4M8I4_9ERIC;tr|A0A834LD04|A0A834LD04_RHOSS	tr|A0A6A4KFW9|A0A6A4KFW9_9ERIC Uncharacterized protein (Fragment) OS=Rhododendron williamsianum OX=262921 GN=C3L33_23510 PE=4 SV=1;tr|A0A6A4M8I4|A0A6A4M8I4_9ERIC Uncharacterized protein (Fragment) OS=Rhododendron williamsianum OX=262921 GN=C3L33_00507 PE=3	NaN	NaN	27.5341	14.693	20.451
tr|A0A834GE51|A0A834GE51_RHOSS;tr|A0A834LE61|A0A834LE61_RHOSS	tr|A0A834GE51|A0A834GE51_RHOSS Uncharacterized protein OS=Rhododendron simsii OX=118357 GN=RHSIM_Rhsim09G0157900 PE=4 SV=1;tr|A0A834LE61|A0A834LE61_RHOSS CPSF_A domain-containing protein OS=Rhododendron simsii OX=118357 GN=RHSIM_Rhsim09G0158100 PE=4 SV=1	NaN	22.6829	23.2733	134.8	20.347
tr|A0A834GBR3|A0A834GBR3_RHOSS;tr|A0A834GBN8|A0A834GBN8_RHOSS	tr|A0A834GBR3|A0A834GBR3_RHOSS PKS_ER domain-containing protein OS=Rhododendron simsii OX=118357 GN=RHSIM_Rhsim10G0175100 PE=3 SV=1;tr|A0A834GBN8|A0A834GBN8_RHOSS PKS_ER domain-containing protein OS=Rhododendron simsii OX=118357 GN=RHSIM_Rhsim10G0174600 PE	NaN	NaN	24.0893	38.873	20.065
tr|G1CT32|G1CT32_RHOIN	tr|G1CT32|G1CT32_RHOIN Glyceraldehyde-3-phosphate dehydrogenase GAPC2 (Fragment) OS=Rhododendron indicum OX=75581 PE=3 SV=1	23.822	NaN	NaN	21.221	19.498
tr|A0A834H5A8|A0A834H5A8_RHOSS	tr|A0A834H5A8|A0A834H5A8_RHOSS Uncharacterized protein OS=Rhododendron simsii OX=118357 GN=RHSIM_Rhsim03G0041200 PE=3 SV=1	24.3639	NaN	NaN	87.601	19.493
tr|A0A6A4LI26|A0A6A4LI26_9ERIC;tr|A0A834GPU5|A0A834GPU5_RHOSS	tr|A0A6A4LI26|A0A6A4LI26_9ERIC COPIIcoated_ERV domain-containing protein (Fragment) OS=Rhododendron williamsianum OX=262921 GN=C3L33_07798 PE=4 SV=1;tr|A0A834GPU5|A0A834GPU5_RHOSS Uncharacterized protein OS=Rhododendron simsii OX=118357 GN=RHSIM_Rhsim07G01	NaN	25.5552	NaN	36.165	18.702
tr|A0A6A4KYA1|A0A6A4KYA1_9ERIC;tr|A0A834HCG5|A0A834HCG5_RHOSS;tr|A0A834H8S6|A0A834H8S6_RHOSS	tr|A0A6A4KYA1|A0A6A4KYA1_9ERIC Uncharacterized protein (Fragment) OS=Rhododendron williamsianum OX=262921 GN=C3L33_15616 PE=4 SV=1;tr|A0A834HCG5|A0A834HCG5_RHOSS Uncharacterized protein OS=Rhododendron simsii OX=118357 GN=RHSIM_Rhsim02G0149100 PE=3 SV=1	24.2636	24.1105	NaN	113.65	18.53
tr|A0A834LB58|A0A834LB58_RHOSS;tr|A0A6A4L6V0|A0A6A4L6V0_9ERIC	tr|A0A834LB58|A0A834LB58_RHOSS CTP_transf_like domain-containing protein OS=Rhododendron simsii OX=118357 GN=RHSIM_Rhsim09G0103900 PE=4 SV=1;tr|A0A6A4L6V0|A0A6A4L6V0_9ERIC CTP_transf_like domain-containing protein (Fragment) OS=Rhododendron williamsianum O	NaN	26.5318	NaN	44.287	16.95
tr|A0A6A4KUR6|A0A6A4KUR6_9ERIC	tr|A0A6A4KUR6|A0A6A4KUR6_9ERIC Uncharacterized protein (Fragment) OS=Rhododendron williamsianum OX=262921 GN=C3L33_21563 PE=3 SV=1	NaN	NaN	26.0301	48.054	16.754
tr|A0A6A4MK32|A0A6A4MK32_9ERIC	tr|A0A6A4MK32|A0A6A4MK32_9ERIC Uncharacterized protein (Fragment) OS=Rhododendron williamsianum OX=262921 GN=C3L33_00483 PE=3 SV=1	24.0878	24.2721	NaN	90.798	16.583
tr|A0A834H4W8|A0A834H4W8_RHOSS;tr|A0A6A4LDK6|A0A6A4LDK6_9ERIC;tr|A0A834GWC7|A0A834GWC7_RHOSS;tr|A0A6A4LFT2|A0A6A4LFT2_9ERIC	tr|A0A834H4W8|A0A834H4W8_RHOSS Vesicle-fusing ATPase OS=Rhododendron simsii OX=118357 GN=RHSIM_Rhsim04G0021300 PE=3 SV=1;tr|A0A6A4LDK6|A0A6A4LDK6_9ERIC Vesicle-fusing ATPase (Fragment) OS=Rhododendron williamsianum OX=262921 GN=C3L33_11686 PE=3 SV=1;tr|A0A	24.0533	23.2917	NaN	82.664	16.552
tr|A0A6A4LZD3|A0A6A4LZD3_9ERIC;tr|A0A6A4M7A2|A0A6A4M7A2_9ERIC;tr|A0A834G029|A0A834G029_RHOSS	tr|A0A6A4LZD3|A0A6A4LZD3_9ERIC Uncharacterized protein (Fragment) OS=Rhododendron williamsianum OX=262921 GN=C3L33_06655 PE=4 SV=1;tr|A0A6A4M7A2|A0A6A4M7A2_9ERIC Uncharacterized protein (Fragment) OS=Rhododendron williamsianum OX=262921 GN=C3L33_00908 PE=4	23.6681	24.8122	NaN	166.25	16.364
tr|A0A6A4L8T3|A0A6A4L8T3_9ERIC;tr|A0A834LAV4|A0A834LAV4_RHOSS;tr|A0A834G2V3|A0A834G2V3_RHOSS;tr|A0A6A4M7Y5|A0A6A4M7Y5_9ERIC;tr|A0A834LEN8|A0A834LEN8_RHOSS;tr|A0A6A4L139|A0A6A4L139_9ERIC;tr|A0A6A4L0L4|A0A6A4L0L4_9ERIC;tr|A0A834GDK9|A0A834GDK9_RHOSS	tr|A0A6A4L8T3|A0A6A4L8T3_9ERIC Allene-oxide cyclase (Fragment) OS=Rhododendron williamsianum OX=262921 GN=C3L33_13428 PE=3 SV=1;tr|A0A834LAV4|A0A834LAV4_RHOSS Allene-oxide cyclase OS=Rhododendron simsii OX=118357 GN=RHSIM_Rhsim10G0063500 PE=3 SV=1;tr|A0A83	22.8534	NaN	NaN	22.909	16.088
tr|A0A6A4KUL8|A0A6A4KUL8_9ERIC;tr|A0A834LEX9|A0A834LEX9_RHOSS;tr|A0A6A4LYS4|A0A6A4LYS4_9ERIC;tr|A0A834FYA5|A0A834FYA5_RHOSS	tr|A0A6A4KUL8|A0A6A4KUL8_9ERIC Carboxypeptidase (Fragment) OS=Rhododendron williamsianum OX=262921 GN=C3L33_16792 PE=3 SV=1;tr|A0A834LEX9|A0A834LEX9_RHOSS Carboxypeptidase OS=Rhododendron simsii OX=118357 GN=RHSIM_Rhsim09G0147200 PE=3 SV=1;tr|A0A6A4LYS4|A0	NaN	22.2226	24.2745	56.062	15.902
tr|A0A6A4KUR9|A0A6A4KUR9_9ERIC;tr|A0A834GHA3|A0A834GHA3_RHOSS;tr|A0A6A4M1N3|A0A6A4M1N3_9ERIC;tr|A0A6A4KCV3|A0A6A4KCV3_9ERIC;tr|A0A834GG43|A0A834GG43_RHOSS	tr|A0A6A4KUR9|A0A6A4KUR9_9ERIC Uncharacterized protein (Fragment) OS=Rhododendron williamsianum OX=262921 GN=C3L33_19081 PE=3 SV=1;tr|A0A834GHA3|A0A834GHA3_RHOSS Uncharacterized protein OS=Rhododendron simsii OX=118357 GN=RHSIM_Rhsim10G0001900 PE=3 SV=1;tr	23.1061	22.8268	NaN	34.581	15.868
tr|A0A834GLR0|A0A834GLR0_RHOSS;tr|A0A834GJ70|A0A834GJ70_RHOSS;tr|A0A834L6D5|A0A834L6D5_RHOSS;tr|A0A6A4MP17|A0A6A4MP17_9ERIC	tr|A0A834GLR0|A0A834GLR0_RHOSS Uncharacterized protein OS=Rhododendron simsii OX=118357 GN=RHSIM_Rhsim08G0221200 PE=4 SV=1;tr|A0A834GJ70|A0A834GJ70_RHOSS Uncharacterized protein OS=Rhododendron simsii OX=118357 GN=RHSIM_Rhsim08G0221100 PE=4 SV=1;tr|A0A834L	21.4277	NaN	NaN	103.7	15.818
tr|A0A834LFP2|A0A834LFP2_RHOSS;tr|A0A834L611|A0A834L611_RHOSS;tr|A0A834GFY5|A0A834GFY5_RHOSS;tr|A0A834LZE7|A0A834LZE7_RHOSS;tr|A0A834LIS3|A0A834LIS3_RHOSS;tr|A0A834GVZ4|A0A834GVZ4_RHOSS;tr|A0A834G514|A0A834G514_RHOSS	tr|A0A834LFP2|A0A834LFP2_RHOSS Uncharacterized protein OS=Rhododendron simsii OX=118357 GN=RHSIM_Rhsim08G0053200 PE=3 SV=1;tr|A0A834L611|A0A834L611_RHOSS Uncharacterized protein OS=Rhododendron simsii OX=118357 GN=RHSIM_Rhsim12G0044000 PE=3 SV=1;tr|A0A834G	23.9462	NaN	NaN	24.177	15.78
tr|A0A6A4LRN4|A0A6A4LRN4_9ERIC;tr|A0A6A4LW53|A0A6A4LW53_9ERIC	tr|A0A6A4LRN4|A0A6A4LRN4_9ERIC Uncharacterized protein (Fragment) OS=Rhododendron williamsianum OX=262921 GN=C3L33_07406 PE=3 SV=1	27.4403	27.4402	27.7044	95.658	15.698
tr|A0A834GGF6|A0A834GGF6_RHOSS;tr|A0A6A4MNK6|A0A6A4MNK6_9ERIC	tr|A0A834GGF6|A0A834GGF6_RHOSS Uncharacterized protein OS=Rhododendron simsii OX=118357 GN=RHSIM_Rhsim08G0128800 PE=3 SV=1;tr|A0A6A4MNK6|A0A6A4MNK6_9ERIC Uncharacterized protein (Fragment) OS=Rhododendron williamsianum OX=262921 GN=C3L33_01015 PE=3 SV=1	21.0132	NaN	NaN	61.239	15.628
tr|A0A834L7I4|A0A834L7I4_RHOSS;tr|A0A834L803|A0A834L803_RHOSS;tr|A0A6A4KNT6|A0A6A4KNT6_9ERIC	tr|A0A834L7I4|A0A834L7I4_RHOSS Uncharacterized protein OS=Rhododendron simsii OX=118357 GN=RHSIM_Rhsim11G0165900 PE=4 SV=1;tr|A0A834L803|A0A834L803_RHOSS Methionine S-methyltransferase OS=Rhododendron simsii OX=118357 GN=RHSIM_Rhsim11G0117400 PE=3 SV=1;tr|	24.6537	24.6137	NaN	88.128	15.171
tr|A0A834FTL5|A0A834FTL5_RHOSS	tr|A0A834FTL5|A0A834FTL5_RHOSS Uncharacterized protein OS=Rhododendron simsii OX=118357 GN=RHSIM_RhsimUnG0226200 PE=3 SV=1	NaN	NaN	24.754	108.85	14.178
tr|A0A6A4LHK2|A0A6A4LHK2_9ERIC;tr|A0A834HBG6|A0A834HBG6_RHOSS	tr|A0A6A4LHK2|A0A6A4LHK2_9ERIC Uncharacterized protein (Fragment) OS=Rhododendron williamsianum OX=262921 GN=C3L33_12130 PE=4 SV=1;tr|A0A834HBG6|A0A834HBG6_RHOSS Uncharacterized protein OS=Rhododendron simsii OX=118357 GN=RHSIM_Rhsim04G0102400 PE=4 SV=1	NaN	NaN	24.3848	36.727	14.055
tr|A0A834GD15|A0A834GD15_RHOSS;tr|A0A6A4KU69|A0A6A4KU69_9ERIC	tr|A0A834GD15|A0A834GD15_RHOSS Uricase OS=Rhododendron simsii OX=118357 GN=RHSIM_Rhsim09G0141100 PE=3 SV=1;tr|A0A6A4KU69|A0A6A4KU69_9ERIC Urate oxidase (Fragment) OS=Rhododendron williamsianum OX=262921 GN=C3L33_16843 PE=3 SV=1	23.2124	22.593	NaN	28.044	13.892
tr|A0A834G1J0|A0A834G1J0_RHOSS	tr|A0A834G1J0|A0A834G1J0_RHOSS 5-methyltetrahydropteroyltriglutamate--homocysteine S-methyltransferase OS=Rhododendron simsii OX=118357 GN=RHSIM_Rhsim13G0199800 PE=3 SV=1	NaN	22.8017	NaN	99.628	13.703
tr|A0A6A4LG53|A0A6A4LG53_9ERIC;tr|A0A834H4R1|A0A834H4R1_RHOSS	tr|A0A6A4LG53|A0A6A4LG53_9ERIC Phenylalanyl-tRNA synthetase (Fragment) OS=Rhododendron williamsianum OX=262921 GN=C3L33_11448 PE=3 SV=1;tr|A0A834H4R1|A0A834H4R1_RHOSS Phenylalanyl-tRNA synthetase OS=Rhododendron simsii OX=118357 GN=RHSIM_Rhsim04G0004400 PE	NaN	24.513	NaN	53.45	13.516
tr|A0A834G1H3|A0A834G1H3_RHOSS;tr|A0A834LTE0|A0A834LTE0_RHOSS	tr|A0A834G1H3|A0A834G1H3_RHOSS GB1/RHD3-type G domain-containing protein OS=Rhododendron simsii OX=118357 GN=RHSIM_Rhsim13G0180600 PE=3 SV=1;tr|A0A834LTE0|A0A834LTE0_RHOSS GB1/RHD3-type G domain-containing protein OS=Rhododendron simsii OX=118357 GN=RHSIM_	23.2313	NaN	21.8592	121.51	13.384
tr|A0A834HIK2|A0A834HIK2_RHOSS;tr|A0A6A4MBV5|A0A6A4MBV5_9ERIC;tr|A0A834GJR9|A0A834GJR9_RHOSS;tr|A0A6A4LGF1|A0A6A4LGF1_9ERIC;tr|A0A6A4LZK9|A0A6A4LZK9_9ERIC;tr|A0A6A4LA57|A0A6A4LA57_9ERIC;tr|A0A834LRH7|A0A834LRH7_RHOSS;tr|A0A834L7U7|A0A834L7U7_RHOSS;tr|A0A834HGN0|A0A834HGN0_RHOSS;tr|A0A6A4KUS6|A0A6A4KUS6_9ERIC;tr|A0A6A4LYP2|A0A6A4LYP2_9ERIC;tr|A0A834LP59|A0A834LP59_RHOSS;tr|A0A6A4MCG9|A0A6A4MCG9_9E…	tr|A0A834HIK2|A0A834HIK2_RHOSS UDP-glucuronate decarboxylase OS=Rhododendron simsii OX=118357 GN=RHSIM_Rhsim03G0132500 PE=3 SV=1;tr|A0A6A4MBV5|A0A6A4MBV5_9ERIC UDP-glucuronate decarboxylase (Fragment) OS=Rhododendron williamsianum OX=262921 GN=C3L33_02719	NaN	NaN	25.1605	42.719	12.455
tr|A0A834LZN0|A0A834LZN0_RHOSS;tr|A0A6A4LY11|A0A6A4LY11_9ERIC	tr|A0A834LZN0|A0A834LZN0_RHOSS Lactase OS=Rhododendron simsii OX=118357 GN=RHSIM_Rhsim01G0124100 PE=3 SV=1;tr|A0A6A4LY11|A0A6A4LY11_9ERIC Lactase (Fragment) OS=Rhododendron williamsianum OX=262921 GN=C3L33_05122 PE=3 SV=1	25.4945	NaN	24.546	183.86	12.381
tr|A0A834LY24|A0A834LY24_RHOSS;tr|A0A6A4M939|A0A6A4M939_9ERIC	tr|A0A834LY24|A0A834LY24_RHOSS Uncharacterized protein OS=Rhododendron simsii OX=118357 GN=RHSIM_Rhsim01G0263800 PE=3 SV=1;tr|A0A6A4M939|A0A6A4M939_9ERIC Uncharacterized protein (Fragment) OS=Rhododendron williamsianum OX=262921 GN=C3L33_04244 PE=3 SV=1	NaN	NaN	26.1787	51.585	12.259
tr|A0A6A4MHM7|A0A6A4MHM7_9ERIC;tr|A0A834LFM3|A0A834LFM3_RHOSS	tr|A0A6A4MHM7|A0A6A4MHM7_9ERIC Uncharacterized protein (Fragment) OS=Rhododendron williamsianum OX=262921 GN=C3L33_01031 PE=3 SV=1;tr|A0A834LFM3|A0A834LFM3_RHOSS Uncharacterized protein OS=Rhododendron simsii OX=118357 GN=RHSIM_Rhsim08G0126700 PE=3 SV=1	24.7732	25.0509	NaN	92.31	12.21
tr|A0A6A4LW49|A0A6A4LW49_9ERIC;tr|A0A6A4KAR8|A0A6A4KAR8_9ERIC	tr|A0A6A4LW49|A0A6A4LW49_9ERIC SERPIN domain-containing protein (Fragment) OS=Rhododendron williamsianum OX=262921 GN=C3L33_09557 PE=3 SV=1;tr|A0A6A4KAR8|A0A6A4KAR8_9ERIC SERPIN domain-containing protein (Fragment) OS=Rhododendron williamsianum OX=262921 G	NaN	NaN	23.7754	42.757	11.885
tr|A0A6A4KV25|A0A6A4KV25_9ERIC	tr|A0A6A4KV25|A0A6A4KV25_9ERIC ADH_N domain-containing protein (Fragment) OS=Rhododendron williamsianum OX=262921 GN=C3L33_20951 PE=4 SV=1	NaN	NaN	26.3782	11.494	10.693
tr|A0A6A4L7J7|A0A6A4L7J7_9ERIC;tr|A0A834GLH4|A0A834GLH4_RHOSS	tr|A0A6A4L7J7|A0A6A4L7J7_9ERIC Uncharacterized protein (Fragment) OS=Rhododendron williamsianum OX=262921 GN=C3L33_16317 PE=3 SV=1;tr|A0A834GLH4|A0A834GLH4_RHOSS Uncharacterized protein OS=Rhododendron simsii OX=118357 GN=RHSIM_Rhsim09G0210100 PE=3 SV=1	25.042	NaN	25.0944	39.907	8.9404
tr|A0A6A4LFW3|A0A6A4LFW3_9ERIC;tr|A0A834L6G3|A0A834L6G3_RHOSS;tr|A0A834GJ89|A0A834GJ89_RHOSS	tr|A0A6A4LFW3|A0A6A4LFW3_9ERIC Serine/threonine-protein phosphatase 2A 55 kDa regulatory subunit B (Fragment) OS=Rhododendron williamsianum OX=262921 GN=C3L33_14683 PE=3 SV=1;tr|A0A834L6G3|A0A834L6G3_RHOSS Serine/threonine-protein phosphatase 2A 55 kDa reg	18.6749	NaN	NaN	38.628	8.6136

## Sheet: Ripening
		log₂ LFQ intenisty
Protein IDs	Fasta headers	CG	SG	CV	SV	CR	SR	Mol. weight [kDa]	Score
tr|A0A6A4KS07|A0A6A4KS07_9ERIC;tr|A0A834LQY4|A0A834LQY4_RHOSS;tr|A0A834LMD9|A0A834LMD9_RHOSS	tr|A0A6A4KS07|A0A6A4KS07_9ERIC Adenosine kinase (Fragment) OS=Rhododendron williamsianum OX=262921 GN=C3L33_20155 PE=3 SV=1;tr|A0A834LQY4|A0A834LQY4_RHOSS Adenosine kinase OS=Rhododendron simsii OX=118357 GN=RHSIM_Rhsim05G0179500 PE=3 SV=1	26.9978	26.8667	NaN	28.1427	28.0671	27.8761	41.72	323.31
tr|A0A834GED3|A0A834GED3_RHOSS;tr|A0A6A4KUM5|A0A6A4KUM5_9ERIC;tr|A0A834G2B8|A0A834G2B8_RHOSS;tr|A0A6A4L855|A0A6A4L855_9ERIC;tr|A0A834GJB5|A0A834GJB5_RHOSS	tr|A0A834GED3|A0A834GED3_RHOSS UDP-glucose 6-dehydrogenase OS=Rhododendron simsii OX=118357 GN=RHSIM_Rhsim10G0044100 PE=3 SV=1;tr|A0A6A4KUM5|A0A6A4KUM5_9ERIC UDP-glucose 6-dehydrogenase (Fragment) OS=Rhododendron williamsianum OX=262921 GN=C3L33_18764 PE=3	25.2896	24.9835	25.9063	25.8192	25.3442	25.6922	53.026	323.31
tr|A0A834GAK6|A0A834GAK6_RHOSS;tr|A0A6A4KX31|A0A6A4KX31_9ERIC;tr|A0A6A4KSD0|A0A6A4KSD0_9ERIC;tr|A0A834HA53|A0A834HA53_RHOSS	tr|A0A834GAK6|A0A834GAK6_RHOSS PCI domain-containing protein OS=Rhododendron simsii OX=118357 GN=RHSIM_Rhsim11G0192900 PE=3 SV=1;tr|A0A6A4KX31|A0A6A4KX31_9ERIC PCI domain-containing protein (Fragment) OS=Rhododendron williamsianum OX=262921 GN=C3L33_20708	23.8196	23.1547	23.7159	24.2166	24.2075	23.054	57.04	323.31
tr|A0A6A4KXS2|A0A6A4KXS2_9ERIC;tr|A0A6A4MFG7|A0A6A4MFG7_9ERIC;tr|A0A834LWL8|A0A834LWL8_RHOSS;tr|A0A834GFN7|A0A834GFN7_RHOSS	tr|A0A6A4KXS2|A0A6A4KXS2_9ERIC Alpha-galactosidase (Fragment) OS=Rhododendron williamsianum OX=262921 GN=C3L33_20443 PE=3 SV=1	28.2537	28.2253	28.7086	28.2998	28.5905	28.7244	37.215	323.31
tr|A0A6A4L4F0|A0A6A4L4F0_9ERIC;tr|A0A834LU30|A0A834LU30_RHOSS;tr|A0A2Z5U6P2|A0A2Z5U6P2_KALPR	tr|A0A6A4L4F0|A0A6A4L4F0_9ERIC Epimerase domain-containing protein (Fragment) OS=Rhododendron williamsianum OX=262921 GN=C3L33_15021 PE=4 SV=1;tr|A0A834LU30|A0A834LU30_RHOSS Epimerase domain-containing protein OS=Rhododendron simsii OX=118357 GN=RHSIM_Rhsi	26.3027	26.7787	25.5076	27.8162	27.3296	27.7723	42.606	323.31
tr|A0A6A4L8V2|A0A6A4L8V2_9ERIC	tr|A0A6A4L8V2|A0A6A4L8V2_9ERIC Uncharacterized protein (Fragment) OS=Rhododendron williamsianum OX=262921 GN=C3L33_15860 PE=4 SV=1	28.2024	27.8415	28.4163	28.7076	28.2943	28.6377	35.778	323.31
tr|A0A6A4L930|A0A6A4L930_9ERIC;tr|X5I326|X5I326_9ERIC;tr|Q8L6D2|Q8L6D2_RHOSS;tr|A0A2Z5QL08|A0A2Z5QL08_RHODA;tr|A0A834FUH5|A0A834FUH5_RHOSS;tr|A0A834FV40|A0A834FV40_RHOSS;tr|A0A4Y6JLW5|A0A4Y6JLW5_9ERIC;tr|A0A834LV68|A0A834LV68_RHOSS;tr|H6UKR4|H6UKR4_VACCO;tr|A0A4Y6JM43|A0A4Y6JM43_9ERIC;tr|A0A6A4KYP5|A0A6A4KYP5_9ERIC;tr|X5IG77|X5IG77_9ERIC;tr|A0A068PWE3|A0A068PWE3_CASLY;tr|A0A068PXK4|A0A068PXK4_9ER…	tr|A0A6A4L930|A0A6A4L930_9ERIC Uncharacterized protein (Fragment) OS=Rhododendron williamsianum OX=262921 GN=C3L33_15158 PE=3 SV=1;tr|X5I326|X5I326_9ERIC Chalcone synthase OS=Vaccinium ashei OX=945837 GN=CHS2 PE=2 SV=1;tr|Q8L6D2|Q8L6D2_RHOSS Chalcone synth	NaN	NaN	NaN	NaN	28.1831	27.4502	44.751	323.31
tr|A0A6A4LBG3|A0A6A4LBG3_9ERIC;tr|A0A834G2F1|A0A834G2F1_RHOSS	tr|A0A6A4LBG3|A0A6A4LBG3_9ERIC Glyceraldehyde-3-phosphate dehydrogenase (Fragment) OS=Rhododendron williamsianum OX=262921 GN=C3L33_13280 PE=3 SV=1;tr|A0A834G2F1|A0A834G2F1_RHOSS Glyceraldehyde-3-phosphate dehydrogenase OS=Rhododendron simsii OX=118357 GN=	27.4749	26.885	26.8287	25.753	25.873	26.1127	40.963	323.31
tr|A0A6A4LE63|A0A6A4LE63_9ERIC;tr|A0A834L389|A0A834L389_RHOSS;tr|A0A6A4LUX3|A0A6A4LUX3_9ERIC;tr|A0A6A4KK97|A0A6A4KK97_9ERIC;tr|A0A6A4LV75|A0A6A4LV75_9ERIC	tr|A0A6A4LE63|A0A6A4LE63_9ERIC Uncharacterized protein (Fragment) OS=Rhododendron williamsianum OX=262921 GN=C3L33_11578 PE=3 SV=1;tr|A0A834L389|A0A834L389_RHOSS Uncharacterized protein OS=Rhododendron simsii OX=118357 GN=RHSIM_RhsimUnG0250200 PE=3 SV=1	27.8908	27.2586	27.3398	26.8758	27.3157	NaN	112.5	323.31
tr|A0A834GRS0|A0A834GRS0_RHOSS;tr|A0A6A4LKS3|A0A6A4LKS3_9ERIC	tr|A0A834GRS0|A0A834GRS0_RHOSS Uncharacterized protein OS=Rhododendron simsii OX=118357 GN=RHSIM_Rhsim06G0162500 PE=3 SV=1;tr|A0A6A4LKS3|A0A6A4LKS3_9ERIC Uncharacterized protein (Fragment) OS=Rhododendron williamsianum OX=262921 GN=C3L33_10185 PE=3 SV=1	25.4625	NaN	25.3737	NaN	NaN	NaN	111.69	323.31
tr|A0A6A4LQC1|A0A6A4LQC1_9ERIC;tr|A0A6A4LR70|A0A6A4LR70_9ERIC;tr|A0A6A4L4Q2|A0A6A4L4Q2_9ERIC;tr|A0A6A4L1X2|A0A6A4L1X2_9ERIC;tr|A0A834GX81|A0A834GX81_RHOSS;tr|A0A834G9H8|A0A834G9H8_RHOSS;tr|A0A834GE04|A0A834GE04_RHOSS	tr|A0A6A4LQC1|A0A6A4LQC1_9ERIC Catalase (Fragment) OS=Rhododendron williamsianum OX=262921 GN=C3L33_09406 PE=3 SV=1;tr|A0A6A4LR70|A0A6A4LR70_9ERIC Catalase (Fragment) OS=Rhododendron williamsianum OX=262921 GN=C3L33_11250 PE=3 SV=1;tr|A0A6A4L4Q2|A0A6A4L4Q2	25.3632	25.2104	NaN	25.3727	26.4395	26.2473	53.439	323.31
tr|A0A6A4LQJ5|A0A6A4LQJ5_9ERIC;tr|A0A834GWU3|A0A834GWU3_RHOSS	tr|A0A6A4LQJ5|A0A6A4LQJ5_9ERIC Tr-type G domain-containing protein (Fragment) OS=Rhododendron williamsianum OX=262921 GN=C3L33_09667 PE=3 SV=1;tr|A0A834GWU3|A0A834GWU3_RHOSS Uncharacterized protein OS=Rhododendron simsii OX=118357 GN=RHSIM_Rhsim06G0239600	27.9383	28.2355	27.792	28.4662	27.8631	27.3554	93.654	323.31
tr|A0A6A4M0Y7|A0A6A4M0Y7_9ERIC	tr|A0A6A4M0Y7|A0A6A4M0Y7_9ERIC Lipoxygenase (Fragment) OS=Rhododendron williamsianum OX=262921 GN=C3L33_05810 PE=3 SV=1	27.8984	28.1746	26.445	26.8987	25.3158	26.0788	58.014	323.31
tr|A0A6A4M2P9|A0A6A4M2P9_9ERIC;tr|A0A834G4H8|A0A834G4H8_RHOSS;tr|A0A6A4LG01|A0A6A4LG01_9ERIC;tr|A0A834LSW9|A0A834LSW9_RHOSS;tr|A0A834FUP7|A0A834FUP7_RHOSS	tr|A0A6A4M2P9|A0A6A4M2P9_9ERIC 40S ribosomal protein S8 (Fragment) OS=Rhododendron williamsianum OX=262921 GN=C3L33_07250 PE=3 SV=1;tr|A0A834G4H8|A0A834G4H8_RHOSS 40S ribosomal protein S8 OS=Rhododendron simsii OX=118357 GN=RHSIM_Rhsim13G0050700 PE=3 SV=1	25.5512	25.6751	26.3099	25.5295	25.8556	26.4586	30.75	323.31
tr|A0A6A4M3B6|A0A6A4M3B6_9ERIC;tr|A0A834G455|A0A834G455_RHOSS;tr|A0A834LIA3|A0A834LIA3_RHOSS;tr|A0A6A4MCH3|A0A6A4MCH3_9ERIC	tr|A0A6A4M3B6|A0A6A4M3B6_9ERIC Uncharacterized protein (Fragment) OS=Rhododendron williamsianum OX=262921 GN=C3L33_06831 PE=4 SV=1;tr|A0A834G455|A0A834G455_RHOSS Uncharacterized protein OS=Rhododendron simsii OX=118357 GN=RHSIM_Rhsim13G0098600 PE=4 SV=1	26.9872	25.5476	26.257	26.1438	26.7457	27.0698	99.392	323.31
tr|A0A6A4M8Z6|A0A6A4M8Z6_9ERIC;tr|A0A834HJ59|A0A834HJ59_RHOSS	tr|A0A6A4M8Z6|A0A6A4M8Z6_9ERIC Alba domain-containing protein (Fragment) OS=Rhododendron williamsianum OX=262921 GN=C3L33_04306 PE=4 SV=1;tr|A0A834HJ59|A0A834HJ59_RHOSS Alba domain-containing protein OS=Rhododendron simsii OX=118357 GN=RHSIM_Rhsim01G025750	NaN	NaN	NaN	NaN	24.1347	23.9274	36.928	323.31
tr|A0A6A4M9R1|A0A6A4M9R1_9ERIC	tr|A0A6A4M9R1|A0A6A4M9R1_9ERIC Sucrose synthase (Fragment) OS=Rhododendron williamsianum OX=262921 GN=C3L33_04010 PE=3 SV=1	28.1829	28.0605	27.7328	27.4308	27.7415	27.5032	93.034	323.31
tr|D6MMT2|D6MMT2_9ERIC;tr|A0A834G033|A0A834G033_RHOSS;tr|A0A1P8NPT1|A0A1P8NPT1_9ERIC;tr|A0A834LYD5|A0A834LYD5_RHOSS;tr|A0A834HM85|A0A834HM85_RHOSS;tr|A0A834FZ60|A0A834FZ60_RHOSS;tr|A0A834LSH9|A0A834LSH9_RHOSS;tr|A0A834LUC6|A0A834LUC6_RHOSS;tr|A0A834L4L3|A0A834L4L3_RHOSS;tr|A0A834FTW0|A0A834FTW0_RHOSS;tr|A0A834FX39|A0A834FX39_RHOSS;tr|A0A834G050|A0A834G050_RHOSS;tr|A0A834L6H5|A0A834L6H5_RHOSS;tr|A…	tr|D6MMT2|D6MMT2_9ERIC Heat shock protein 70 OS=Rhododendron calophytum OX=479660 PE=2 SV=1;tr|A0A834G033|A0A834G033_RHOSS Uncharacterized protein OS=Rhododendron simsii OX=118357 GN=RHSIM_Rhsim13G0084100 PE=3 SV=1;tr|A0A1P8NPT1|A0A1P8NPT1_9ERIC Heat shock	29.6129	29.8568	29.741	29.5051	29.2854	30.1368	71.192	323.31
tr|A0A834G647|A0A834G647_RHOSS;tr|A0A6A4KWZ7|A0A6A4KWZ7_9ERIC	tr|A0A834G647|A0A834G647_RHOSS Protein kinase domain-containing protein OS=Rhododendron simsii OX=118357 GN=RHSIM_Rhsim11G0176000 PE=3 SV=1;tr|A0A6A4KWZ7|A0A6A4KWZ7_9ERIC Uncharacterized protein (Fragment) OS=Rhododendron williamsianum OX=262921 GN=C3L33_2	27.9508	27.2623	27.9062	27.784	27.4488	27.1832	151.83	323.31
tr|X5I323|X5I323_9ERIC;tr|A0A834GAI3|A0A834GAI3_RHOSS;tr|A0A6A4KQ81|A0A6A4KQ81_9ERIC;tr|A0A834LDN6|A0A834LDN6_RHOSS;tr|A0A6A4KVY8|A0A6A4KVY8_9ERIC;tr|F8WQK9|F8WQK9_9ERIC	tr|X5I323|X5I323_9ERIC Action OS=Vaccinium ashei OX=945837 GN=ACT PE=2 SV=1;tr|A0A834GAI3|A0A834GAI3_RHOSS Uncharacterized protein OS=Rhododendron simsii OX=118357 GN=RHSIM_Rhsim10G0141300 PE=3 SV=1;tr|A0A6A4KQ81|A0A6A4KQ81_9ERIC Uncharacterized protein (F	29.1442	29.9166	29.6352	30.2024	30.4663	30.6082	41.695	323.31
tr|A0A834GBJ7|A0A834GBJ7_RHOSS	tr|A0A834GBJ7|A0A834GBJ7_RHOSS Glutamine synthetase OS=Rhododendron simsii OX=118357 GN=RHSIM_Rhsim10G0178400 PE=3 SV=1	28.5283	28.4917	28.8882	28.577	28.7805	28.5686	39.2	323.31
tr|A0A834GGW3|A0A834GGW3_RHOSS;tr|A0A6A4KZN0|A0A6A4KZN0_9ERIC;tr|A0A834GEG2|A0A834GEG2_RHOSS	tr|A0A834GGW3|A0A834GGW3_RHOSS ATP synthase subunit beta OS=Rhododendron simsii OX=118357 GN=RHSIM_Rhsim09G0069100 PE=3 SV=1;tr|A0A6A4KZN0|A0A6A4KZN0_9ERIC H(+)-transporting two-sector ATPase (Fragment) OS=Rhododendron williamsianum OX=262921 GN=C3L33_1713	26.7967	26.5958	25.8186	26.9445	27.6219	26.5434	64.811	323.31
tr|A0A834GJK7|A0A834GJK7_RHOSS	tr|A0A834GJK7|A0A834GJK7_RHOSS Phospholipase D OS=Rhododendron simsii OX=118357 GN=RHSIM_Rhsim08G0214000 PE=3 SV=1	25.9659	27.3283	26.7396	27.1229	27.2159	26.4126	92.13	323.31
tr|A0A834GKB3|A0A834GKB3_RHOSS;tr|A0A6A4MF27|A0A6A4MF27_9ERIC	tr|A0A834GKB3|A0A834GKB3_RHOSS V-ATPase 69 kDa subunit OS=Rhododendron simsii OX=118357 GN=RHSIM_Rhsim08G0250100 PE=3 SV=1;tr|A0A6A4MF27|A0A6A4MF27_9ERIC V-ATPase 69 kDa subunit (Fragment) OS=Rhododendron williamsianum OX=262921 GN=C3L33_00028 PE=3 SV=1	26.2545	26.1621	27.198	26.5759	27.131	26.6827	68.9	323.31
tr|A0A834GM81|A0A834GM81_RHOSS;tr|A0A6A4MQ87|A0A6A4MQ87_9ERIC;tr|A0A834HBC0|A0A834HBC0_RHOSS	tr|A0A834GM81|A0A834GM81_RHOSS Coatomer subunit beta OS=Rhododendron simsii OX=118357 GN=RHSIM_Rhsim08G0248400 PE=4 SV=1;tr|A0A6A4MQ87|A0A6A4MQ87_9ERIC Uncharacterized protein (Fragment) OS=Rhododendron williamsianum OX=262921 GN=C3L33_00043 PE=4 SV=1	27.5766	27.2404	27.9933	28.5988	27.6101	27.6931	105.79	323.31
tr|A0A834GRA6|A0A834GRA6_RHOSS	tr|A0A834GRA6|A0A834GRA6_RHOSS Pectin acetylesterase OS=Rhododendron simsii OX=118357 GN=RHSIM_Rhsim07G0141400 PE=3 SV=1	24.4159	23.5791	25.23	24.9813	24.5964	24.2681	54.141	323.31
tr|A0A834GY77|A0A834GY77_RHOSS;tr|A0A6A4LY78|A0A6A4LY78_9ERIC	tr|A0A834GY77|A0A834GY77_RHOSS Aminotran_1_2 domain-containing protein OS=Rhododendron simsii OX=118357 GN=RHSIM_Rhsim07G0102700 PE=3 SV=1;tr|A0A6A4LY78|A0A6A4LY78_9ERIC Aminotran_1_2 domain-containing protein (Fragment) OS=Rhododendron williamsianum OX=26	27.0196	27.166	27.4854	26.6697	NaN	25.8299	87.382	323.31
tr|A0A834H2L4|A0A834H2L4_RHOSS	tr|A0A834H2L4|A0A834H2L4_RHOSS ATP citrate synthase OS=Rhododendron simsii OX=118357 GN=RHSIM_Rhsim04G0239000 PE=4 SV=1	26.5054	26.4837	25.8912	26.2586	25.8438	25.925	63.913	323.31
tr|A0A834LFK9|A0A834LFK9_RHOSS;tr|A0A6A4KVG6|A0A6A4KVG6_9ERIC;tr|A0A834L2F9|A0A834L2F9_RHOSS	tr|A0A834LFK9|A0A834LFK9_RHOSS Clathrin heavy chain OS=Rhododendron simsii OX=118357 GN=RHSIM_Rhsim09G0178400 PE=3 SV=1	28.5792	27.4433	29.4648	28.8464	29.3063	29.0119	193.03	323.31
tr|A0A834LFU7|A0A834LFU7_RHOSS;tr|A0A6A4MJ90|A0A6A4MJ90_9ERIC	tr|A0A834LFU7|A0A834LFU7_RHOSS Elongation factor Tu OS=Rhododendron simsii OX=118357 GN=RHSIM_Rhsim08G0178200 PE=3 SV=1;tr|A0A6A4MJ90|A0A6A4MJ90_9ERIC Uncharacterized protein (Fragment) OS=Rhododendron williamsianum OX=262921 GN=C3L33_00628 PE=3 SV=1	26.5769	26.6064	24.8334	26.5188	26.048	26.3589	50.049	323.31
tr|A0A834LPM3|A0A834LPM3_RHOSS	tr|A0A834LPM3|A0A834LPM3_RHOSS Oxoglutarate dehydrogenase (succinyl-transferring) OS=Rhododendron simsii OX=118357 GN=RHSIM_Rhsim03G0127100 PE=3 SV=1	26.4069	26.6321	26.0208	25.967	27.013	26.2409	149.11	323.31
tr|A0A834LTJ3|A0A834LTJ3_RHOSS;tr|A0A6A4M6F4|A0A6A4M6F4_9ERIC	tr|A0A834LTJ3|A0A834LTJ3_RHOSS Phosphopyruvate hydratase OS=Rhododendron simsii OX=118357 GN=RHSIM_Rhsim03G0171300 PE=3 SV=1;tr|A0A6A4M6F4|A0A6A4M6F4_9ERIC Phosphopyruvate hydratase (Fragment) OS=Rhododendron williamsianum OX=262921 GN=C3L33_03123 PE=3 SV=	28.0489	28.4417	27.4928	27.5889	27.5314	27.5174	45.741	323.31
tr|A0A834LTN6|A0A834LTN6_RHOSS	tr|A0A834LTN6|A0A834LTN6_RHOSS 5-methyltetrahydropteroyltriglutamate--homocysteine S-methyltransferase OS=Rhododendron simsii OX=118357 GN=RHSIM_Rhsim03G0053000 PE=3 SV=1	29.0274	29.4832	29.6273	29.3996	29.1065	29.2987	89.368	323.31
tr|A0A834LV15|A0A834LV15_RHOSS;tr|A0A6A4KXR9|A0A6A4KXR9_9ERIC	tr|A0A834LV15|A0A834LV15_RHOSS Aspartate aminotransferase OS=Rhododendron simsii OX=118357 GN=RHSIM_Rhsim02G0181400 PE=3 SV=1;tr|A0A6A4KXR9|A0A6A4KXR9_9ERIC Aspartate aminotransferase (Fragment) OS=Rhododendron williamsianum OX=262921 GN=C3L33_15804 PE=3 S	28.8913	28.9957	29.5719	29.0059	29.0355	28.9545	51.486	323.31
tr|A0A834LWF2|A0A834LWF2_RHOSS;tr|A0A6A4L5M7|A0A6A4L5M7_9ERIC;tr|A0A834LHR4|A0A834LHR4_RHOSS;tr|A0A6A4LUU4|A0A6A4LUU4_9ERIC	tr|A0A834LWF2|A0A834LWF2_RHOSS Protein transport protein SEC23 OS=Rhododendron simsii OX=118357 GN=RHSIM_Rhsim02G0069600 PE=3 SV=1;tr|A0A6A4L5M7|A0A6A4L5M7_9ERIC Protein transport protein SEC23 (Fragment) OS=Rhododendron williamsianum OX=262921 GN=C3L33_15	24.1534	24.6568	24.739	24.3249	NaN	24.6236	88.781	323.31
tr|Q31779|Q31779_ARBCA;tr|U3G063|U3G063_ARBUN;tr|A0A0A7NX68|A0A0A7NX68_ARBUN;tr|A0A0F7EWA3|A0A0F7EWA3_ARCAL;tr|A0A6F8SNM0|A0A6F8SNM0_9ERIC;tr|A0A0F7G516|A0A0F7G516_9ERIC;tr|Q71N68|Q71N68_RHOGE;sp|P28447|RBL_RHOHI;tr|Q37157|Q37157_ARDCR;tr|Q8SLM1|Q8SLM1_EM	tr|Q31779|Q31779_ARBCA Ribulose bisphosphate carboxylase large chain (Fragment) OS=Arbutus canariensis OX=13343 GN=rbcL PE=3 SV=2;tr|U3G063|U3G063_ARBUN Ribulose bisphosphate carboxylase large chain OS=Arbutus unedo OX=84005 GN=rbcL PE=3 SV=1;tr|A0A0A7NX68	30.4231	30.3049	29.0323	28.9096	29.0673	28.7154	51.63	323.31
tr|V9PBV0|V9PBV0_VACMA;tr|B0FA00|B0FA00_9ERIC;tr|A0A7M1LC10|A0A7M1LC10_RHOSS;tr|A0A834FY43|A0A834FY43_RHOSS;tr|Q8SIC5|Q8SIC5_9ERIC;tr|E5LEZ4|E5LEZ4_9ERIC;tr|E5LEY5|E5LEY5_9ERIC;tr|I1ZHA6|I1ZHA6_9ERIC;tr|E5DK37|E5DK37_ARBCA;tr|Q8SIG1|Q8SIG1_CHIUM;tr|Q3ZMK4|Q3ZMK4_RHOIM;tr|Q8SIF3|Q8SIF3_EMPNI;tr|Q8SIF2|Q8SIF2_ENKCA;tr|A0A834FX42|A0A834FX42_RHOSS;tr|A0A834GQW4|A0A834GQW4_RHOSS;tr|A0A834HDE9|A0A834HD…	tr|V9PBV0|V9PBV0_VACMA ATP synthase subunit alpha OS=Vaccinium macrocarpon OX=13750 GN=atp1 PE=3 SV=1;tr|B0FA00|B0FA00_9ERIC ATP synthase subunit alpha (Fragment) OS=Vaccinium arboreum OX=229201 GN=atp1 PE=3 SV=1;tr|A0A7M1LC10|A0A7M1LC10_RHOSS ATP synthase	27.6085	27.4002	28.7838	28.0079	28.5792	28.5842	55.47	323.31
tr|A0A834G7U1|A0A834G7U1_RHOSS;tr|A0A834GBK9|A0A834GBK9_RHOSS;tr|A0A834GB13|A0A834GB13_RHOSS;tr|A0A834G6Q5|A0A834G6Q5_RHOSS;tr|A0A6A4KQ06|A0A6A4KQ06_9ERIC;tr|A0A6A4KU14|A0A6A4KU14_9ERIC;tr|A0A834L8A4|A0A834L8A4_RHOSS;tr|A0A834G3D1|A0A834G3D1_RHOSS;tr|A0A834GG45|A0A834GG45_RHOSS;tr|A0A6A4KSQ7|A0A6A4KSQ7_9ERIC;tr|A0A6A4L7B3|A0A6A4L7B3_9ERIC;tr|A0A6A4KMD0|A0A6A4KMD0_9ERIC;tr|A0A6A4KXJ2|A0A6A4KXJ2_9E…	tr|A0A834G7U1|A0A834G7U1_RHOSS Uncharacterized protein OS=Rhododendron simsii OX=118357 GN=RHSIM_Rhsim11G0041300 PE=3 SV=1;tr|A0A834GBK9|A0A834GBK9_RHOSS Uncharacterized protein OS=Rhododendron simsii OX=118357 GN=RHSIM_Rhsim08G0179700 PE=3 SV=1;tr|A0A834G	28.5511	27.7804	28.7655	28.5311	28.5382	28.9034	46.741	313.57
tr|A0A834LLS5|A0A834LLS5_RHOSS;tr|A0A834GRJ6|A0A834GRJ6_RHOSS;tr|A0A834LIQ2|A0A834LIQ2_RHOSS;tr|A0A6A4LQW0|A0A6A4LQW0_9ERIC;tr|A0A6A4LFF1|A0A6A4LFF1_9ERIC;tr|A0A6A4M114|A0A6A4M114_9ERIC	tr|A0A834LLS5|A0A834LLS5_RHOSS Aspartate--tRNA ligase OS=Rhododendron simsii OX=118357 GN=RHSIM_Rhsim07G0113300 PE=3 SV=1;tr|A0A834GRJ6|A0A834GRJ6_RHOSS Aspartate--tRNA ligase OS=Rhododendron simsii OX=118357 GN=RHSIM_Rhsim07G0113700 PE=3 SV=1;tr|A0A834LIQ	25.9963	25.7889	NaN	25.973	NaN	26.2864	59.944	308.49
tr|V9PBK9|V9PBK9_VACMA;tr|A0A7M1LDS3|A0A7M1LDS3_RHOSS;tr|A0A834G042|A0A834G042_RHOSS	tr|V9PBK9|V9PBK9_VACMA NADH dehydrogenase subunit 7 OS=Vaccinium macrocarpon OX=13750 GN=nad7 PE=3 SV=1;tr|A0A7M1LDS3|A0A7M1LDS3_RHOSS NADH dehydrogenase subunit 7 OS=Rhododendron simsii OX=118357 GN=nad7 PE=3 SV=1;tr|A0A834G042|A0A834G042_RHOSS Complex1_4	26.6182	26.1993	27.0086	26.911	26.3775	26.4441	44.385	299.99
tr|U3G044|U3G044_ARBUN;tr|A0A6H1U989|A0A6H1U989_9ERIC;tr|D3WCQ6|D3WCQ6_RHOSS;tr|A0A1B0ZEW4|A0A1B0ZEW4_9ERIC;tr|A0A1B1CZM3|A0A1B1CZM3_9ERIC;tr|A0A8F5CDG6|A0A8F5CDG6_9ERIC;tr|A0A8F5CD03|A0A8F5CD03_9ERIC;tr|A0A8F5CCW9|A0A8F5CCW9_9ERIC;tr|A0A8F3ELJ4|A0A8F3ELJ4_RHOML;tr|A0A8E5N7Q9|A0A8E5N7Q9_9ERIC;tr|A0A898CTL6|A0A898CTL6_9ERIC;tr|A0A7M1ICH1|A0A7M1ICH1_9ERIC;tr|A0A7D5JLC7|A0A7D5JLC7_9ERIC;tr|A0A6B9JDH…	tr|U3G044|U3G044_ARBUN ATP synthase subunit alpha, chloroplastic OS=Arbutus unedo OX=84005 GN=atpA PE=3 SV=1;tr|A0A6H1U989|A0A6H1U989_9ERIC ATP synthase subunit alpha, chloroplastic OS=Rhododendron delavayi var. delavayi OX=1495201 GN=atpA PE=3 SV=1;tr|D3W	27.4239	27.8334	27.5676	27.5426	26.9588	27.3561	55.262	296.33
tr|A0A6A4KZB6|A0A6A4KZB6_9ERIC;tr|A0A834GCT9|A0A834GCT9_RHOSS	tr|A0A6A4KZB6|A0A6A4KZB6_9ERIC UDP-arabinopyranose mutase (Fragment) OS=Rhododendron williamsianum OX=262921 GN=C3L33_18723 PE=3 SV=1;tr|A0A834GCT9|A0A834GCT9_RHOSS UDP-arabinopyranose mutase OS=Rhododendron simsii OX=118357 GN=RHSIM_Rhsim10G0056100 PE=3 S	NaN	NaN	NaN	25.1855	24.9993	25.3282	41.64	293.01
tr|A0A834GZK8|A0A834GZK8_RHOSS;tr|A0A6A4KZ65|A0A6A4KZ65_9ERIC	tr|A0A834GZK8|A0A834GZK8_RHOSS Eukaryotic translation initiation factor 3 subunit A OS=Rhododendron simsii OX=118357 GN=RHSIM_Rhsim05G0135800 PE=3 SV=1;tr|A0A6A4KZ65|A0A6A4KZ65_9ERIC PCI domain-containing protein (Fragment) OS=Rhododendron williamsianum OX	NaN	NaN	NaN	24.0541	NaN	24.2307	110.7	288.05
tr|A0A834G9N6|A0A834G9N6_RHOSS;tr|A0A6A4LCV3|A0A6A4LCV3_9ERIC;tr|A0A834G743|A0A834G743_RHOSS	tr|A0A834G9N6|A0A834G9N6_RHOSS UDP-arabinopyranose mutase OS=Rhododendron simsii OX=118357 GN=RHSIM_Rhsim12G0149600 PE=3 SV=1;tr|A0A6A4LCV3|A0A6A4LCV3_9ERIC UDP-arabinopyranose mutase (Fragment) OS=Rhododendron williamsianum OX=262921 GN=C3L33_14210 PE=3 S	28.8817	29.9973	28.5945	29.1842	29.2965	29.488	40.87	287.48
tr|A0A834HIX9|A0A834HIX9_RHOSS;tr|A0A6A4LAU6|A0A6A4LAU6_9ERIC;tr|I1U4K8|I1U4K8_9ERIC;tr|A0A6A4LH25|A0A6A4LH25_9ERIC;tr|A0A6A4KIP4|A0A6A4KIP4_9ERIC;tr|A0A834GTK1|A0A834GTK1_RHOSS	tr|A0A834HIX9|A0A834HIX9_RHOSS Malate dehydrogenase OS=Rhododendron simsii OX=118357 GN=RHSIM_Rhsim02G0037400 PE=3 SV=1;tr|A0A6A4LAU6|A0A6A4LAU6_9ERIC Malate dehydrogenase (Fragment) OS=Rhododendron williamsianum OX=262921 GN=C3L33_15068 PE=3 SV=1;tr|I1U4K	24.9527	NaN	NaN	NaN	24.8149	24.1443	88.91	286.22
tr|A0A6A4LR12|A0A6A4LR12_9ERIC	tr|A0A6A4LR12|A0A6A4LR12_9ERIC Uncharacterized protein (Fragment) OS=Rhododendron williamsianum OX=262921 GN=C3L33_10269 PE=3 SV=1	26.5823	26.939	26.2715	25.771	25.3304	25.157	42.558	286.02
tr|A0A834LV39|A0A834LV39_RHOSS;tr|A0A6A4LBI2|A0A6A4LBI2_9ERIC;tr|A0A834LX87|A0A834LX87_RHOSS;tr|A0A6A4L9G2|A0A6A4L9G2_9ERIC;tr|G3BG93|G3BG93_9ERIC;tr|L8AXE9|L8AXE9_PHYNP;tr|G3BG84|G3BG84_9ERIC;tr|K4EJU6|K4EJU6_RHOSB;tr|K4EJS6|K4EJS6_9ERIC;tr|K4EJI2|K4EJI2_9ERIC;tr|G3BG99|G3BG99_9ERIC;tr|G3BG98|G3BG98_9ERIC;tr|G3BG97|G3BG97_9ERIC;tr|G3BG91|G3BG91_9ERIC;tr|G3BG95|G3BG95_9ERIC;tr|G3BG83|G3BG83_9ERIC…	tr|A0A834LV39|A0A834LV39_RHOSS 40S ribosomal protein SA OS=Rhododendron simsii OX=118357 GN=RHSIM_Rhsim02G0252600 PE=3 SV=1;tr|A0A6A4LBI2|A0A6A4LBI2_9ERIC Uncharacterized protein (Fragment) OS=Rhododendron williamsianum OX=262921 GN=C3L33_16195 PE=3 SV=1;t	28.5539	29.5657	28.1544	28.6209	28.5995	28.8749	46.922	285.55
tr|A0A6A4KNX2|A0A6A4KNX2_9ERIC	tr|A0A6A4KNX2|A0A6A4KNX2_9ERIC Alpha-1,4 glucan phosphorylase (Fragment) OS=Rhododendron williamsianum OX=262921 GN=C3L33_18765 PE=3 SV=1	26.6867	25.086	26.1914	26.0106	25.3449	25.3286	106.8	280.14
tr|A0A834GTU4|A0A834GTU4_RHOSS;tr|A0A834LS08|A0A834LS08_RHOSS;tr|A0A6A4LBE0|A0A6A4LBE0_9ERIC;tr|A0A6A4L911|A0A6A4L911_9ERIC	tr|A0A834GTU4|A0A834GTU4_RHOSS Uncharacterized protein OS=Rhododendron simsii OX=118357 GN=RHSIM_Rhsim07G0079900 PE=3 SV=1;tr|A0A834LS08|A0A834LS08_RHOSS Uncharacterized protein OS=Rhododendron simsii OX=118357 GN=RHSIM_Rhsim02G0248700 PE=4 SV=1;tr|A0A6A4L	24.1425	24.9499	NaN	23.2055	NaN	24.2453	73.612	277
tr|A0A6A4KY05|A0A6A4KY05_9ERIC;tr|A0A834GEG5|A0A834GEG5_RHOSS;tr|A0A834GI20|A0A834GI20_RHOSS;tr|A0A292GD22|A0A292GD22_PHYNP;tr|A0A292GC44|A0A292GC44_9ERIC;tr|A0A292GBA0|A0A292GBA0_PHYEM;tr|A0A292GB63|A0A292GB63_9ERIC;tr|A0A292G606|A0A292G606_9ERIC;tr|A0A292G4P3|A0A292G4P3_PHYCU;tr|A0A2Z5VG13|A0A2Z5VG13_9ERIC;tr|A0A292GBA9|A0A292GBA9_9ERIC;tr|A0A2Z5VFQ2|A0A2Z5VFQ2_9ERIC	tr|A0A6A4KY05|A0A6A4KY05_9ERIC Iso_dh domain-containing protein (Fragment) OS=Rhododendron williamsianum OX=262921 GN=C3L33_17956 PE=3 SV=1;tr|A0A834GEG5|A0A834GEG5_RHOSS Isocitrate dehydrogenase [NADP] OS=Rhododendron simsii OX=118357 GN=RHSIM_Rhsim10G018	28.6803	27.6758	27.1656	27.3478	28.3371	28.3693	45.271	270.29
tr|A0A6A4L1L1|A0A6A4L1L1_9ERIC;tr|A0A834L5K6|A0A834L5K6_RHOSS	tr|A0A6A4L1L1|A0A6A4L1L1_9ERIC Diadenosine tetraphosphate synthetase (Fragment) OS=Rhododendron williamsianum OX=262921 GN=C3L33_14504 PE=3 SV=1;tr|A0A834L5K6|A0A834L5K6_RHOSS Diadenosine tetraphosphate synthetase OS=Rhododendron simsii OX=118357 GN=RHSIM_	27.1594	26.9076	26.9326	26.8301	25.9766	27.166	67.065	268.7
tr|A0A834GBR1|A0A834GBR1_RHOSS	tr|A0A834GBR1|A0A834GBR1_RHOSS Iso_dh domain-containing protein OS=Rhododendron simsii OX=118357 GN=RHSIM_Rhsim10G0199600 PE=3 SV=1	26.9772	26.6697	26.5329	27.497	27.353	27.1783	36.892	268.56
tr|A0A834HBZ4|A0A834HBZ4_RHOSS;tr|A0A6A4L412|A0A6A4L412_9ERIC;tr|A0A834GHF5|A0A834GHF5_RHOSS;tr|A0A834LG53|A0A834LG53_RHOSS	tr|A0A834HBZ4|A0A834HBZ4_RHOSS Adenosylhomocysteinase OS=Rhododendron simsii OX=118357 GN=RHSIM_Rhsim02G0062100 PE=3 SV=1;tr|A0A6A4L412|A0A6A4L412_9ERIC Adenosylhomocysteinase (Fragment) OS=Rhododendron williamsianum OX=262921 GN=C3L33_15205 PE=3 SV=1	28.0952	27.929	28.419	28.1442	27.4838	27.9543	53.219	265.85
tr|U3G064|U3G064_ARBUN;tr|Q9M4Q3|Q9M4Q3_ARBUN;tr|A0A8F5CCN1|A0A8F5CCN1_9ERIC;tr|A0A7M1ICN3|A0A7M1ICN3_9ERIC;tr|A0A6B9JJC9|A0A6B9JJC9_9ERIC;tr|A0A6H1U801|A0A6H1U801_9ERIC;tr|A0A7D5FGS8|A0A7D5FGS8_9ERIC;tr|Q8SLS3|Q8SLS3_9ERIC;tr|A0A4D6PZL8|A0A4D6PZL8_9ERIC;tr|A0A1X9PJ48|A0A1X9PJ48_9ERIC;tr|A0A1X9PLR4|A0A1X9PLR4_9ERIC;tr|A0A1X9PMB3|A0A1X9PMB3_9ERIC;tr|A0A1X9PPP1|A0A1X9PPP1_9ERIC;tr|A0A8F5H4S9|A0A8F5…	tr|U3G064|U3G064_ARBUN ATP synthase subunit beta, chloroplastic OS=Arbutus unedo OX=84005 GN=atpB PE=3 SV=1;tr|Q9M4Q3|Q9M4Q3_ARBUN ATP synthase subunit beta (Fragment) OS=Arbutus unedo OX=84005 GN=atpB PE=3 SV=1;tr|A0A8F5CCN1|A0A8F5CCN1_9ERIC ATP synthase	25.4198	25.2836	25.8139	25.8349	26.3769	25.3665	53.931	262.15
tr|A0A6A4LFI6|A0A6A4LFI6_9ERIC;tr|A0A834H1K7|A0A834H1K7_RHOSS	tr|A0A6A4LFI6|A0A6A4LFI6_9ERIC Phosphoenolpyruvate carboxylase (Fragment) OS=Rhododendron williamsianum OX=262921 GN=C3L33_11733 PE=3 SV=1;tr|A0A834H1K7|A0A834H1K7_RHOSS Phosphoenolpyruvate carboxylase OS=Rhododendron simsii OX=118357 GN=RHSIM_Rhsim04G0026	28.074	27.1672	27.563	27.6375	27.45	27.9477	109.92	254.55
tr|A0A6A4KXU7|A0A6A4KXU7_9ERIC	tr|A0A6A4KXU7|A0A6A4KXU7_9ERIC Sucrose synthase (Fragment) OS=Rhododendron williamsianum OX=262921 GN=C3L33_19213 PE=3 SV=1	28.6127	28.1808	28.4542	28.3007	29.2197	29.1757	90.277	245.07
tr|A0A834LFI5|A0A834LFI5_RHOSS;tr|A0A6A4LNY6|A0A6A4LNY6_9ERIC	tr|A0A834LFI5|A0A834LFI5_RHOSS Uncharacterized protein OS=Rhododendron simsii OX=118357 GN=RHSIM_Rhsim07G0088700 PE=3 SV=1;tr|A0A6A4LNY6|A0A6A4LNY6_9ERIC Uncharacterized protein (Fragment) OS=Rhododendron williamsianum OX=262921 GN=C3L33_08538 PE=3 SV=1	26.7757	NaN	26.4825	26.8013	26.4414	26.4643	103.06	240.94
tr|A0A834L8E9|A0A834L8E9_RHOSS;tr|A0A834G503|A0A834G503_RHOSS;tr|A0A834L8K7|A0A834L8K7_RHOSS;tr|A0A834G5X4|A0A834G5X4_RHOSS;tr|A0A834G555|A0A834G555_RHOSS;tr|A0A6A4LAH3|A0A6A4LAH3_9ERIC	tr|A0A834L8E9|A0A834L8E9_RHOSS Uncharacterized protein OS=Rhododendron simsii OX=118357 GN=RHSIM_Rhsim12G0197900 PE=4 SV=1;tr|A0A834G503|A0A834G503_RHOSS OVATE domain-containing protein OS=Rhododendron simsii OX=118357 GN=RHSIM_Rhsim12G0198100 PE=4 SV=1;tr	27.3821	27.4252	26.7914	26.7173	26.8357	27.0315	93.614	238.68
tr|A0A6A4M5S9|A0A6A4M5S9_9ERIC;tr|A0A6A4M0Q2|A0A6A4M0Q2_9ERIC	tr|A0A6A4M5S9|A0A6A4M5S9_9ERIC Phosphopyruvate hydratase (Fragment) OS=Rhododendron williamsianum OX=262921 GN=C3L33_02557 PE=3 SV=1	28.0482	28.6107	27.8757	27.6364	27.6181	28.2617	45.467	237.86
tr|A0A6A4LBC2|A0A6A4LBC2_9ERIC	tr|A0A6A4LBC2|A0A6A4LBC2_9ERIC Uncharacterized protein (Fragment) OS=Rhododendron williamsianum OX=262921 GN=C3L33_10243 PE=3 SV=1	23.1866	NaN	23.2284	NaN	NaN	NaN	102.15	232.55
tr|A0A834GB46|A0A834GB46_RHOSS;tr|A0A6A4L043|A0A6A4L043_9ERIC;tr|A0A834GI74|A0A834GI74_RHOSS;tr|A0A834LA04|A0A834LA04_RHOSS	tr|A0A834GB46|A0A834GB46_RHOSS Uncharacterized protein OS=Rhododendron simsii OX=118357 GN=RHSIM_Rhsim10G0014200 PE=3 SV=1;tr|A0A6A4L043|A0A6A4L043_9ERIC Uncharacterized protein (Fragment) OS=Rhododendron williamsianum OX=262921 GN=C3L33_19046 PE=3 SV=1;tr	26.0581	25.8946	23.3281	25.9458	24.4903	24.8468	85.44	228.93
tr|A0A6A4KRH6|A0A6A4KRH6_9ERIC;tr|A0A834H687|A0A834H687_RHOSS;tr|A0A834G8X3|A0A834G8X3_RHOSS;tr|A0A834G878|A0A834G878_RHOSS;tr|A0A6A4KK79|A0A6A4KK79_9ERIC	tr|A0A6A4KRH6|A0A6A4KRH6_9ERIC Uncharacterized protein (Fragment) OS=Rhododendron williamsianum OX=262921 GN=C3L33_19787 PE=3 SV=1;tr|A0A834H687|A0A834H687_RHOSS Uncharacterized protein OS=Rhododendron simsii OX=118357 GN=RHSIM_Rhsim05G0113400 PE=3 SV=1	26.0413	NaN	NaN	NaN	NaN	25.25	61.575	220.28
tr|A0A834GLA1|A0A834GLA1_RHOSS	tr|A0A834GLA1|A0A834GLA1_RHOSS Ribonuclease OS=Rhododendron simsii OX=118357 GN=RHSIM_Rhsim08G0199800 PE=4 SV=1	26.308	25.5004	26.0881	26.3353	26.2216	26.4817	109.99	219.65
tr|A0A834HIW7|A0A834HIW7_RHOSS;tr|A0A6A4M3J8|A0A6A4M3J8_9ERIC	tr|A0A834HIW7|A0A834HIW7_RHOSS Aha1_N domain-containing protein OS=Rhododendron simsii OX=118357 GN=RHSIM_Rhsim03G0004900 PE=3 SV=1;tr|A0A6A4M3J8|A0A6A4M3J8_9ERIC Aha1_N domain-containing protein (Fragment) OS=Rhododendron williamsianum OX=262921 GN=C3L33_	25.3013	25.1702	24.8533	25.4083	25.4586	25.6998	39.256	214.85
tr|A0A834H0N4|A0A834H0N4_RHOSS;tr|A0A6A4LWK5|A0A6A4LWK5_9ERIC;tr|A0A6A4M870|A0A6A4M870_9ERIC;tr|A0A834HPX5|A0A834HPX5_RHOSS	tr|A0A834H0N4|A0A834H0N4_RHOSS Sec16_C domain-containing protein OS=Rhododendron simsii OX=118357 GN=RHSIM_Rhsim07G0059400 PE=3 SV=1;tr|A0A6A4LWK5|A0A6A4LWK5_9ERIC Sec16_C domain-containing protein (Fragment) OS=Rhododendron williamsianum OX=262921 GN=C3L3	26.3409	NaN	26.3452	25.9069	26.3922	25.9668	126.3	214.61
tr|A0A834GQ61|A0A834GQ61_RHOSS;tr|A0A6A4LQ76|A0A6A4LQ76_9ERIC;tr|A0A834HBA4|A0A834HBA4_RHOSS;tr|A0A6A4LKQ4|A0A6A4LKQ4_9ERIC;tr|A0A834LMC4|A0A834LMC4_RHOSS	tr|A0A834GQ61|A0A834GQ61_RHOSS Uncharacterized protein OS=Rhododendron simsii OX=118357 GN=RHSIM_Rhsim07G0252800 PE=3 SV=1;tr|A0A6A4LQ76|A0A6A4LQ76_9ERIC Uncharacterized protein (Fragment) OS=Rhododendron williamsianum OX=262921 GN=C3L33_09434 PE=3 SV=1	26.8858	26.2479	26.9096	27.8391	27.3135	28.8502	59.791	209.43
tr|A0A834L399|A0A834L399_RHOSS;tr|A0A6A4LVK2|A0A6A4LVK2_9ERIC	tr|A0A834L399|A0A834L399_RHOSS Endoglucanase OS=Rhododendron simsii OX=118357 GN=RHSIM_Rhsim13G0008700 PE=3 SV=1;tr|A0A6A4LVK2|A0A6A4LVK2_9ERIC Pectinesterase (Fragment) OS=Rhododendron williamsianum OX=262921 GN=C3L33_07636 PE=3 SV=1	26.7268	26.572	27.123	27.6916	29.5053	28.9226	221.41	209.17
tr|A0A834H752|A0A834H752_RHOSS	tr|A0A834H752|A0A834H752_RHOSS Malic enzyme OS=Rhododendron simsii OX=118357 GN=RHSIM_Rhsim03G0237400 PE=3 SV=1	27.7426	28.305	27.1142	27.2997	26.0908	27.6723	66.37	205.47
tr|A0A834G7N9|A0A834G7N9_RHOSS;tr|A0A6A4KWF1|A0A6A4KWF1_9ERIC;tr|A0A6A4KSV2|A0A6A4KSV2_9ERIC	tr|A0A834G7N9|A0A834G7N9_RHOSS S-methyl-5-thioribose kinase OS=Rhododendron simsii OX=118357 GN=RHSIM_Rhsim11G0159300 PE=3 SV=1;tr|A0A6A4KWF1|A0A6A4KWF1_9ERIC APH domain-containing protein (Fragment) OS=Rhododendron williamsianum OX=262921 GN=C3L33_20953 P	26.9156	27.0716	NaN	26.5546	25.9905	26.5714	47.425	196.99
tr|A0A834GNJ2|A0A834GNJ2_RHOSS;tr|A0A6A4LM78|A0A6A4LM78_9ERIC;tr|A0A6A4KCQ8|A0A6A4KCQ8_9ERIC	tr|A0A834GNJ2|A0A834GNJ2_RHOSS Malic enzyme OS=Rhododendron simsii OX=118357 GN=RHSIM_Rhsim07G0145700 PE=3 SV=1;tr|A0A6A4LM78|A0A6A4LM78_9ERIC Malic enzyme (Fragment) OS=Rhododendron williamsianum OX=262921 GN=C3L33_08946 PE=3 SV=1	23.558	24.3008	25.1449	23.935	23.9948	23.6697	78.024	194.18
tr|A0A834FXD5|A0A834FXD5_RHOSS;tr|A0A6A4LMW6|A0A6A4LMW6_9ERIC	tr|A0A834FXD5|A0A834FXD5_RHOSS Alanine--glyoxylate transaminase OS=Rhododendron simsii OX=118357 GN=RHSIM_Rhsim13G0215900 PE=3 SV=1;tr|A0A6A4LMW6|A0A6A4LMW6_9ERIC Aminotran_5 domain-containing protein (Fragment) OS=Rhododendron williamsianum OX=262921 GN=C	27.3066	27.0934	25.4501	26.4401	26.673	27.399	45.891	192.37
tr|A0A834GG08|A0A834GG08_RHOSS;tr|A0A6A4L8L6|A0A6A4L8L6_9ERIC	tr|A0A834GG08|A0A834GG08_RHOSS Ubiquitinyl hydrolase 1 OS=Rhododendron simsii OX=118357 GN=RHSIM_Rhsim09G0140000 PE=3 SV=1;tr|A0A6A4L8L6|A0A6A4L8L6_9ERIC Ubiquitinyl hydrolase 1 (Fragment) OS=Rhododendron williamsianum OX=262921 GN=C3L33_16853 PE=3 SV=1	26.7004	NaN	25.1097	25.0095	24.8264	NaN	166.8	181.72
tr|A0A834G059|A0A834G059_RHOSS;tr|A0A6A4M0T2|A0A6A4M0T2_9ERIC	tr|A0A834G059|A0A834G059_RHOSS Lipoxygenase OS=Rhododendron simsii OX=118357 GN=RHSIM_Rhsim13G0225600 PE=3 SV=1	29.0167	28.8928	27.5775	27.9557	27.6094	27.8415	101.61	181.44
tr|A0A6A4LWC6|A0A6A4LWC6_9ERIC;tr|A0A834GQW0|A0A834GQW0_RHOSS;tr|A0A834LJI3|A0A834LJI3_RHOSS	tr|A0A6A4LWC6|A0A6A4LWC6_9ERIC AAA domain-containing protein (Fragment) OS=Rhododendron williamsianum OX=262921 GN=C3L33_09483 PE=3 SV=1;tr|A0A834GQW0|A0A834GQW0_RHOSS AAA domain-containing protein OS=Rhododendron simsii OX=118357 GN=RHSIM_Rhsim07G0243000	26.1755	26.948	27.4873	27.4012	27.6726	27.3476	44.702	179.55
tr|A0A6A4KMR0|A0A6A4KMR0_9ERIC;tr|A0A834LQF6|A0A834LQF6_RHOSS	tr|A0A6A4KMR0|A0A6A4KMR0_9ERIC Uncharacterized protein (Fragment) OS=Rhododendron williamsianum OX=262921 GN=C3L33_22717 PE=3 SV=1;tr|A0A834LQF6|A0A834LQF6_RHOSS Uncharacterized protein OS=Rhododendron simsii OX=118357 GN=RHSIM_Rhsim04G0127300 PE=3 SV=1	NaN	NaN	NaN	NaN	25.0329	24.5051	50.295	179.49
tr|A0A6A4MAP8|A0A6A4MAP8_9ERIC;tr|A0A834M2I7|A0A834M2I7_RHOSS	tr|A0A6A4MAP8|A0A6A4MAP8_9ERIC S-(hydroxymethyl)glutathione dehydrogenase (Fragment) OS=Rhododendron williamsianum OX=262921 GN=C3L33_04286 PE=3 SV=1;tr|A0A834M2I7|A0A834M2I7_RHOSS S-(hydroxymethyl)glutathione dehydrogenase OS=Rhododendron simsii OX=118357	26.6309	27.773	28.8989	28.5726	27.5385	27.6196	41.122	176.86
tr|A0A834G4T4|A0A834G4T4_RHOSS;tr|A0A6A4LBA2|A0A6A4LBA2_9ERIC	tr|A0A834G4T4|A0A834G4T4_RHOSS Uncharacterized protein OS=Rhododendron simsii OX=118357 GN=RHSIM_Rhsim12G0006200 PE=3 SV=1;tr|A0A6A4LBA2|A0A6A4LBA2_9ERIC Uncharacterized protein (Fragment) OS=Rhododendron williamsianum OX=262921 GN=C3L33_13201 PE=3 SV=1	NaN	23.9257	24.2849	24.6955	25.7116	25.6081	68.129	176.68
tr|A0A834GRY6|A0A834GRY6_RHOSS;tr|A0A834LTB3|A0A834LTB3_RHOSS;tr|A0A6A4LGI0|A0A6A4LGI0_9ERIC;tr|A0A6A4M2V8|A0A6A4M2V8_9ERIC;tr|A0A6A4LJV0|A0A6A4LJV0_9ERIC	tr|A0A834GRY6|A0A834GRY6_RHOSS HATPase_c domain-containing protein OS=Rhododendron simsii OX=118357 GN=RHSIM_Rhsim06G0232600 PE=3 SV=1;tr|A0A834LTB3|A0A834LTB3_RHOSS HATPase_c domain-containing protein OS=Rhododendron simsii OX=118357 GN=RHSIM_Rhsim03G0191	26.578	26.2669	27.5704	27.5873	27.5919	27.6048	80.318	176.32
tr|A0A834GTK2|A0A834GTK2_RHOSS;tr|A0A834GV77|A0A834GV77_RHOSS;tr|A0A6A4L8F6|A0A6A4L8F6_9ERIC;tr|A0A1J0A0N6|A0A1J0A0N6_RHOML;tr|A0A6A4LLS6|A0A6A4LLS6_9ERIC	tr|A0A834GTK2|A0A834GTK2_RHOSS Glyceraldehyde-3-phosphate dehydrogenase OS=Rhododendron simsii OX=118357 GN=RHSIM_Rhsim07G0257000 PE=3 SV=1;tr|A0A834GV77|A0A834GV77_RHOSS Glyceraldehyde-3-phosphate dehydrogenase OS=Rhododendron simsii OX=118357 GN=RHSIM_Rh	24.8698	25.0799	NaN	24.2117	NaN	22.8087	45.666	171.99
tr|A0A834G0K1|A0A834G0K1_RHOSS;tr|A0A6A4L7J4|A0A6A4L7J4_9ERIC;tr|A0A834LTV7|A0A834LTV7_RHOSS	tr|A0A834G0K1|A0A834G0K1_RHOSS Acetylornithine transaminase OS=Rhododendron simsii OX=118357 GN=RHSIM_Rhsim12G0188700 PE=3 SV=1;tr|A0A6A4L7J4|A0A6A4L7J4_9ERIC Acetylornithine transaminase (Fragment) OS=Rhododendron williamsianum OX=262921 GN=C3L33_14541 PE	NaN	NaN	23.6516	24.2621	NaN	NaN	48.429	165.13
tr|A0A6A4KF34|A0A6A4KF34_9ERIC	tr|A0A6A4KF34|A0A6A4KF34_9ERIC Pectin acetylesterase (Fragment) OS=Rhododendron williamsianum OX=262921 GN=C3L33_21369 PE=3 SV=1	NaN	22.423	NaN	NaN	NaN	22.0087	27.399	163.54
tr|A0A6A4KPL6|A0A6A4KPL6_9ERIC	tr|A0A6A4KPL6|A0A6A4KPL6_9ERIC Phosphoglycerate kinase (Fragment) OS=Rhododendron williamsianum OX=262921 GN=C3L33_22991 PE=3 SV=1	25.1684	25.2251	24.2415	24.88	24.6282	25.2126	76.481	163.51
tr|A0A6A4KRB6|A0A6A4KRB6_9ERIC;tr|A0A834GYN0|A0A834GYN0_RHOSS	tr|A0A6A4KRB6|A0A6A4KRB6_9ERIC Uncharacterized protein (Fragment) OS=Rhododendron williamsianum OX=262921 GN=C3L33_19823 PE=4 SV=1;tr|A0A834GYN0|A0A834GYN0_RHOSS Uncharacterized protein OS=Rhododendron simsii OX=118357 GN=RHSIM_Rhsim05G0069700 PE=4 SV=1	27.6413	26.1833	28.2989	27.958	27.3767	27.2749	144.49	161.86
tr|A0A6A4MFR9|A0A6A4MFR9_9ERIC;tr|A0A834LH06|A0A834LH06_RHOSS;tr|A0A6A4KWV1|A0A6A4KWV1_9ERIC;tr|A0A834LA70|A0A834LA70_RHOSS	tr|A0A6A4MFR9|A0A6A4MFR9_9ERIC UTP--glucose-1-phosphate uridylyltransferase (Fragment) OS=Rhododendron williamsianum OX=262921 GN=C3L33_01816 PE=3 SV=1;tr|A0A834LH06|A0A834LH06_RHOSS UTP--glucose-1-phosphate uridylyltransferase OS=Rhododendron simsii OX=11	25.554	26.3138	25.1186	25.5273	25.35	25.2757	64.168	161.31
tr|A0A6A4L3X7|A0A6A4L3X7_9ERIC	tr|A0A6A4L3X7|A0A6A4L3X7_9ERIC Fructose-bisphosphate aldolase (Fragment) OS=Rhododendron williamsianum OX=262921 GN=C3L33_13780 PE=3 SV=1	26.2296	NaN	NaN	24.7807	24.7864	24.8851	37.859	160.87
tr|A0A6A4MCT2|A0A6A4MCT2_9ERIC;tr|A0A6A4M6I6|A0A6A4M6I6_9ERIC;tr|A0A6A4KHV6|A0A6A4KHV6_9ERIC	tr|A0A6A4MCT2|A0A6A4MCT2_9ERIC Succinate dehydrogenase (quinone) (Fragment) OS=Rhododendron williamsianum OX=262921 GN=C3L33_01129 PE=3 SV=1	26.4649	25.9975	27.1626	26.9781	27.1999	26.8854	72.2	160.6
tr|A0A834G575|A0A834G575_RHOSS;tr|A0A6A4KV52|A0A6A4KV52_9ERIC	tr|A0A834G575|A0A834G575_RHOSS S-adenosylmethionine synthase OS=Rhododendron simsii OX=118357 GN=RHSIM_Rhsim11G0100300 PE=3 SV=1	27.0137	27.4706	26.9736	27.9568	27.4122	27.8405	43.439	159.96
tr|A0A6A4LGF2|A0A6A4LGF2_9ERIC;tr|A0A834L741|A0A834L741_RHOSS	tr|A0A6A4LGF2|A0A6A4LGF2_9ERIC Uncharacterized protein (Fragment) OS=Rhododendron williamsianum OX=262921 GN=C3L33_13738 PE=3 SV=1;tr|A0A834L741|A0A834L741_RHOSS Uncharacterized protein OS=Rhododendron simsii OX=118357 GN=RHSIM_Rhsim12G0083200 PE=3 SV=1	26.0823	26.2187	26.2073	26.7247	27.067	27.1981	102.61	159.25
tr|A0A6A4M7F2|A0A6A4M7F2_9ERIC;tr|A0A834GHC0|A0A834GHC0_RHOSS	tr|A0A6A4M7F2|A0A6A4M7F2_9ERIC Formate dehydrogenase (Fragment) OS=Rhododendron williamsianum OX=262921 GN=C3L33_01595 PE=3 SV=1;tr|A0A834GHC0|A0A834GHC0_RHOSS Formate dehydrogenase, mitochondrial OS=Rhododendron simsii OX=118357 GN=RHSIM_Rhsim08G0055000 P	26.7767	26.9597	28.225	27.1617	26.7714	26.9278	43.058	155.5
tr|A0A834LBG0|A0A834LBG0_RHOSS;tr|A0A6A4L5C0|A0A6A4L5C0_9ERIC;tr|A0A834GA42|A0A834GA42_RHOSS;tr|A0A6A4KRD5|A0A6A4KRD5_9ERIC	tr|A0A834LBG0|A0A834LBG0_RHOSS Uncharacterized protein OS=Rhododendron simsii OX=118357 GN=RHSIM_Rhsim10G0186400 PE=3 SV=1;tr|A0A6A4L5C0|A0A6A4L5C0_9ERIC Uncharacterized protein (Fragment) OS=Rhododendron williamsianum OX=262921 GN=C3L33_17935 PE=3 SV=1;tr	26.4601	26.8582	26.9239	26.7669	26.6051	26.7321	81.354	154.74
tr|A0A834FZR7|A0A834FZR7_RHOSS;tr|A0A6A4LZ25|A0A6A4LZ25_9ERIC;tr|A0A834L217|A0A834L217_RHOSS	tr|A0A834FZR7|A0A834FZR7_RHOSS Aminomethyltransferase OS=Rhododendron simsii OX=118357 GN=RHSIM_Rhsim13G0152700 PE=3 SV=1;tr|A0A6A4LZ25|A0A6A4LZ25_9ERIC Uncharacterized protein (Fragment) OS=Rhododendron williamsianum OX=262921 GN=C3L33_06430 PE=3 SV=1;tr|	27.0549	27.145	27.0707	27.403	26.2468	26.4564	44.458	154.49
tr|A0A834GK15|A0A834GK15_RHOSS;tr|A0A834GN50|A0A834GN50_RHOSS;tr|A0A6A4MKJ0|A0A6A4MKJ0_9ERIC;tr|A0A834L8L5|A0A834L8L5_RHOSS;tr|A0A6A4L7V0|A0A6A4L7V0_9ERIC;tr|B6E2B5|B6E2B5_VACCO	tr|A0A834GK15|A0A834GK15_RHOSS Epimerase domain-containing protein OS=Rhododendron simsii OX=118357 GN=RHSIM_Rhsim08G0207100 PE=4 SV=1;tr|A0A834GN50|A0A834GN50_RHOSS Epimerase domain-containing protein OS=Rhododendron simsii OX=118357 GN=RHSIM_Rhsim08G0206	NaN	NaN	NaN	NaN	24.8318	25.0492	29.713	153.64
tr|A0A834HG31|A0A834HG31_RHOSS;tr|A0A6A4M105|A0A6A4M105_9ERIC;tr|A0A834LJJ4|A0A834LJJ4_RHOSS	tr|A0A834HG31|A0A834HG31_RHOSS AAA domain-containing protein OS=Rhododendron simsii OX=118357 GN=RHSIM_Rhsim02G0193400 PE=3 SV=1;tr|A0A6A4M105|A0A6A4M105_9ERIC AAA domain-containing protein (Fragment) OS=Rhododendron williamsianum OX=262921 GN=C3L33_07818	26.3017	26.1218	NaN	25.4453	26.3928	26.4357	51.782	151.09
tr|A0A6A4LV24|A0A6A4LV24_9ERIC;tr|A0A6H0F007|A0A6H0F007_9ERIC;tr|A0A834G0V8|A0A834G0V8_RHOSS;tr|A0A6H0EXT9|A0A6H0EXT9_9ERIC;tr|A0A834GZG3|A0A834GZG3_RHOSS;tr|A0A6H0EZL9|A0A6H0EZL9_9ERIC;tr|A0A6H0EZ87|A0A6H0EZ87_9ERIC;tr|A0A6H0F0G9|A0A6H0F0G9_9ERIC;tr|A0A6H0EZ99|A0A6H0EZ99_9ERIC;tr|G3BG27|G3BG27_9ERIC;tr|A0A6A4KXV0|A0A6A4KXV0_9ERIC;tr|A0A6H0EXU2|A0A6H0EXU2_9ERIC;tr|K4EK83|K4EK83_9ERIC;tr|K4EJU0|K4…	tr|A0A6A4LV24|A0A6A4LV24_9ERIC ATPase_AAA_core domain-containing protein (Fragment) OS=Rhododendron williamsianum OX=262921 GN=C3L33_07022 PE=3 SV=1;tr|A0A6H0F007|A0A6H0F007_9ERIC Chloroplast ribulose bisphosphate carboxylase/oxygenase activase 2 transcrip	27.7584	27.2119	25.1957	25.8919	25.9339	25.7438	51.542	150.92
tr|A0A834L7X1|A0A834L7X1_RHOSS;tr|A0A6A4LTZ2|A0A6A4LTZ2_9ERIC	tr|A0A834L7X1|A0A834L7X1_RHOSS FAD-binding PCMH-type domain-containing protein OS=Rhododendron simsii OX=118357 GN=RHSIM_Rhsim13G0123200 PE=3 SV=1	26.7474	26.5675	27.5101	26.9429	27.0493	27.157	59.316	144.8
tr|A0A6A4LP47|A0A6A4LP47_9ERIC;tr|A0A834GZZ4|A0A834GZZ4_RHOSS	tr|A0A6A4LP47|A0A6A4LP47_9ERIC Uncharacterized protein (Fragment) OS=Rhododendron williamsianum OX=262921 GN=C3L33_11753 PE=3 SV=1;tr|A0A834GZZ4|A0A834GZZ4_RHOSS Uncharacterized protein OS=Rhododendron simsii OX=118357 GN=RHSIM_Rhsim04G0029500 PE=3 SV=1	24.5794	25.8455	24.6856	25.0053	24.9544	24.7112	44.173	144.46
tr|A0A834HAL3|A0A834HAL3_RHOSS;tr|A0A6A4MCJ4|A0A6A4MCJ4_9ERIC;tr|A0A6A4KHK8|A0A6A4KHK8_9ERIC;tr|A0A6A4KQF1|A0A6A4KQF1_9ERIC;tr|B0FGG5|B0FGG5_VACCO;tr|A0A834L3X7|A0A834L3X7_RHOSS	tr|A0A834HAL3|A0A834HAL3_RHOSS Pyr_redox_2 domain-containing protein OS=Rhododendron simsii OX=118357 GN=RHSIM_Rhsim03G0078300 PE=4 SV=1;tr|A0A6A4MCJ4|A0A6A4MCJ4_9ERIC Pyr_redox_2 domain-containing protein (Fragment) OS=Rhododendron williamsianum OX=262921	NaN	NaN	NaN	NaN	27.527	27.6259	50.451	141.97
tr|A0A834GU39|A0A834GU39_RHOSS;tr|A0A6A4KVZ3|A0A6A4KVZ3_9ERIC;tr|A0A834HDL0|A0A834HDL0_RHOSS	tr|A0A834GU39|A0A834GU39_RHOSS Phosphoglycerate kinase OS=Rhododendron simsii OX=118357 GN=RHSIM_Rhsim05G0232900 PE=3 SV=1;tr|A0A6A4KVZ3|A0A6A4KVZ3_9ERIC Phosphoglycerate kinase (Fragment) OS=Rhododendron williamsianum OX=262921 GN=C3L33_20583 PE=3 SV=1	28.0179	28.5197	27.2584	NaN	28.0175	28.0655	42.447	141.95
tr|A0A834GT54|A0A834GT54_RHOSS;tr|A0A6A4KR64|A0A6A4KR64_9ERIC	tr|A0A834GT54|A0A834GT54_RHOSS Aspartate aminotransferase OS=Rhododendron simsii OX=118357 GN=RHSIM_Rhsim07G0162300 PE=3 SV=1;tr|A0A6A4KR64|A0A6A4KR64_9ERIC Aspartate aminotransferase (Fragment) OS=Rhododendron williamsianum OX=262921 GN=C3L33_22701 PE=3 S	26.6491	27.3509	NaN	27.3837	27.2623	27.326	57.39	141.27
tr|A0A834GN01|A0A834GN01_RHOSS;tr|A0A6A4M1C4|A0A6A4M1C4_9ERIC;tr|A0A6A4K6V9|A0A6A4K6V9_9ERIC	tr|A0A834GN01|A0A834GN01_RHOSS Uncharacterized protein OS=Rhododendron simsii OX=118357 GN=RHSIM_Rhsim08G0129000 PE=3 SV=1;tr|A0A6A4M1C4|A0A6A4M1C4_9ERIC Uncharacterized protein (Fragment) OS=Rhododendron williamsianum OX=262921 GN=C3L33_01014 PE=3 SV=1	25.943	25.1599	24.7187	25.3709	24.4353	NaN	34.911	140.52
tr|A0A6A4L2U8|A0A6A4L2U8_9ERIC;tr|A0A834HCM7|A0A834HCM7_RHOSS	tr|A0A6A4L2U8|A0A6A4L2U8_9ERIC Uncharacterized protein (Fragment) OS=Rhododendron williamsianum OX=262921 GN=C3L33_15673 PE=4 SV=1;tr|A0A834HCM7|A0A834HCM7_RHOSS Obg-like ATPase 1 OS=Rhododendron simsii OX=118357 GN=RHSIM_Rhsim02G0162600 PE=3 SV=1	25.0503	26.0934	25.8644	25.9154	26.5047	26.5478	38.907	140.28
tr|A0A834LVL9|A0A834LVL9_RHOSS;tr|A0A834LFD5|A0A834LFD5_RHOSS;tr|A0A6A4KRP9|A0A6A4KRP9_9ERIC;tr|A0A6A4L6P5|A0A6A4L6P5_9ERIC;tr|A0A834G6W7|A0A834G6W7_RHOSS;tr|A0A6A4LPA6|A0A6A4LPA6_9ERIC;tr|A0A6A4M299|A0A6A4M299_9ERIC;tr|A0A834H0Q4|A0A834H0Q4_RHOSS;tr|A0A6A4KQ05|A0A6A4KQ05_9ERIC;tr|A0A6A4KUN6|A0A6A4KUN6_9ERIC	tr|A0A834LVL9|A0A834LVL9_RHOSS Uncharacterized protein OS=Rhododendron simsii OX=118357 GN=RHSIM_Rhsim01G0227200 PE=3 SV=1;tr|A0A834LFD5|A0A834LFD5_RHOSS Uncharacterized protein OS=Rhododendron simsii OX=118357 GN=RHSIM_Rhsim03G0130900 PE=3 SV=1;tr|A0A6A4K	26.506	26.9687	27.2549	27.363	27.5187	27.6413	41.656	139.99
tr|A0A834GSE0|A0A834GSE0_RHOSS;tr|A0A834LSV3|A0A834LSV3_RHOSS;tr|A0A834H3W3|A0A834H3W3_RHOSS;tr|A0A834G3R5|A0A834G3R5_RHOSS;tr|A0A834LMG5|A0A834LMG5_RHOSS;tr|A0A834FSZ1|A0A834FSZ1_RHOSS;tr|A0A834LIG9|A0A834LIG9_RHOSS;tr|A0A834LR59|A0A834LR59_RHOSS;tr|A0A834H2B7|A0A834H2B7_RHOSS;tr|A0A834G007|A0A834G007_RHOSS	tr|A0A834GSE0|A0A834GSE0_RHOSS Uncharacterized protein OS=Rhododendron simsii OX=118357 GN=RHSIM_Rhsim06G0241500 PE=4 SV=1;tr|A0A834LSV3|A0A834LSV3_RHOSS Ubiquitin-like domain-containing protein OS=Rhododendron simsii OX=118357 GN=RHSIM_Rhsim04G0245900 PE=	28.3138	27.0449	28.6462	28.3319	28.618	28.6688	17.122	136.34
tr|A0A834GT97|A0A834GT97_RHOSS;tr|A0A6A4LSX3|A0A6A4LSX3_9ERIC	tr|A0A834GT97|A0A834GT97_RHOSS Methyltransferase OS=Rhododendron simsii OX=118357 GN=RHSIM_Rhsim06G0080700 PE=3 SV=1;tr|A0A6A4LSX3|A0A6A4LSX3_9ERIC Methyltransferase (Fragment) OS=Rhododendron williamsianum OX=262921 GN=C3L33_10677 PE=3 SV=1	24.2577	NaN	24.0951	NaN	NaN	NaN	78.993	134.96
tr|A0A6A4M6I9|A0A6A4M6I9_9ERIC;tr|A0A834HJW7|A0A834HJW7_RHOSS	tr|A0A6A4M6I9|A0A6A4M6I9_9ERIC Uncharacterized protein (Fragment) OS=Rhododendron williamsianum OX=262921 GN=C3L33_04248 PE=3 SV=1;tr|A0A834HJW7|A0A834HJW7_RHOSS Uncharacterized protein OS=Rhododendron simsii OX=118357 GN=RHSIM_Rhsim01G0263200 PE=3 SV=1	29.0378	29.3089	29.9952	29.3963	30.1271	29.7325	55.392	134.25
tr|A0A834LH50|A0A834LH50_RHOSS;tr|A0A6A4KYV8|A0A6A4KYV8_9ERIC;tr|A0A834LF28|A0A834LF28_RHOSS;tr|A0A834LED3|A0A834LED3_RHOSS;tr|A0A834GDT5|A0A834GDT5_RHOSS;tr|A0A6A4LAD3|A0A6A4LAD3_9ERIC;tr|A0A6A4L2E8|A0A6A4L2E8_9ERIC;tr|A0A6A4K6H1|A0A6A4K6H1_9ERIC;tr|A0A834LE34|A0A834LE34_RHOSS;tr|A0A6A4LE65|A0A6A4LE65_9ERIC;tr|A0A834HAE0|A0A834HAE0_RHOSS;tr|A0A6A4KPN5|A0A6A4KPN5_9ERIC;tr|A0A6A4L8R3|A0A6A4L8R3_9E…	tr|A0A834LH50|A0A834LH50_RHOSS Acyl-[acyl-carrier-protein] desaturase OS=Rhododendron simsii OX=118357 GN=RHSIM_Rhsim09G0009000 PE=3 SV=1;tr|A0A6A4KYV8|A0A6A4KYV8_9ERIC Acyl-[acyl-carrier-protein] desaturase (Fragment) OS=Rhododendron williamsianum OX=2629	24.0067	22.6964	25.4453	24.7535	23.8829	24.1304	45.594	132.03
tr|A0A6A4LBB6|A0A6A4LBB6_9ERIC	tr|A0A6A4LBB6|A0A6A4LBB6_9ERIC Uncharacterized protein (Fragment) OS=Rhododendron williamsianum OX=262921 GN=C3L33_16054 PE=4 SV=1	26.989	25.3482	26.5637	25.9149	NaN	26.1372	97.754	128.24
tr|A0A834HFN0|A0A834HFN0_RHOSS;tr|A0A6A4LC41|A0A6A4LC41_9ERIC	tr|A0A834HFN0|A0A834HFN0_RHOSS Serine hydroxymethyltransferase OS=Rhododendron simsii OX=118357 GN=RHSIM_Rhsim02G0062000 PE=3 SV=1;tr|A0A6A4LC41|A0A6A4LC41_9ERIC Serine hydroxymethyltransferase (Fragment) OS=Rhododendron williamsianum OX=262921 GN=C3L33_15	25.8761	24.6882	25.9656	25.6477	25.1741	25.6374	52.015	128.08
tr|A0A6A4LWC5|A0A6A4LWC5_9ERIC;tr|I1U4L1|I1U4L1_9ERIC;tr|A0A834L8N7|A0A834L8N7_RHOSS;tr|A0A6A4L023|A0A6A4L023_9ERIC	tr|A0A6A4LWC5|A0A6A4LWC5_9ERIC Uncharacterized protein (Fragment) OS=Rhododendron williamsianum OX=262921 GN=C3L33_05743 PE=3 SV=1	25.5684	25.7854	23.17	24.7061	23.4655	23.5937	43.658	125.22
tr|A0A834G3A7|A0A834G3A7_RHOSS;tr|A0A6A4LFD6|A0A6A4LFD6_9ERIC;tr|A0A834H0E9|A0A834H0E9_RHOSS;tr|A0A6A4KXH4|A0A6A4KXH4_9ERIC;tr|A0A834LCG4|A0A834LCG4_RHOSS	tr|A0A834G3A7|A0A834G3A7_RHOSS Phosphoglycerate mutase (2,3-diphosphoglycerate-independent) OS=Rhododendron simsii OX=118357 GN=RHSIM_Rhsim12G0013400 PE=3 SV=1;tr|A0A6A4LFD6|A0A6A4LFD6_9ERIC Phosphoglycerate mutase (2,3-diphosphoglycerate-independent) (Fra	25.8474	25.7774	24.6492	25.3458	24.365	26.4135	61.193	124.81
tr|A0A834LB86|A0A834LB86_RHOSS;tr|A0A6A4KSS7|A0A6A4KSS7_9ERIC	tr|A0A834LB86|A0A834LB86_RHOSS Uncharacterized protein OS=Rhododendron simsii OX=118357 GN=RHSIM_Rhsim11G0160800 PE=3 SV=1;tr|A0A6A4KSS7|A0A6A4KSS7_9ERIC Uncharacterized protein (Fragment) OS=Rhododendron williamsianum OX=262921 GN=C3L33_20941 PE=3 SV=1	24.0007	NaN	23.2063	NaN	NaN	NaN	56.591	123.44
tr|A0A834HEW6|A0A834HEW6_RHOSS	tr|A0A834HEW6|A0A834HEW6_RHOSS Methenyltetrahydrofolate cyclohydrolase OS=Rhododendron simsii OX=118357 GN=RHSIM_Rhsim02G0054100 PE=3 SV=1	NaN	24.4514	NaN	23.5442	NaN	23.9389	41.638	122.83
tr|A0A6A4KNN8|A0A6A4KNN8_9ERIC	tr|A0A6A4KNN8|A0A6A4KNN8_9ERIC Carboxypeptidase (Fragment) OS=Rhododendron williamsianum OX=262921 GN=C3L33_20901 PE=3 SV=1	30.2163	30.2164	30.5785	30.6975	29.9607	30.3709	65.949	122.35
tr|A0A834LGT6|A0A834LGT6_RHOSS;tr|A0A6A4L3S3|A0A6A4L3S3_9ERIC;tr|A0A834HEP1|A0A834HEP1_RHOSS;tr|A0A834LEY6|A0A834LEY6_RHOSS	tr|A0A834LGT6|A0A834LGT6_RHOSS Phosphoglucomutase (alpha-D-glucose-1,6-bisphosphate-dependent) OS=Rhododendron simsii OX=118357 GN=RHSIM_Rhsim09G0093200 PE=3 SV=1;tr|A0A6A4L3S3|A0A6A4L3S3_9ERIC Phosphoglucomutase (alpha-D-glucose-1,6-bisphosphate-dependent	26.4689	25.9925	26.2095	26.2515	25.9477	26.9671	68.365	122.09
tr|A0A6A4LWX5|A0A6A4LWX5_9ERIC;tr|A0A834LXH2|A0A834LXH2_RHOSS;tr|A0A834GQF8|A0A834GQF8_RHOSS;tr|A0A6A4LGW8|A0A6A4LGW8_9ERIC;tr|A0A834LN28|A0A834LN28_RHOSS;tr|A0A834GSP6|A0A834GSP6_RHOSS;tr|A0A834GTZ9|A0A834GTZ9_RHOSS	tr|A0A6A4LWX5|A0A6A4LWX5_9ERIC Vacuolar proton pump subunit B (Fragment) OS=Rhododendron williamsianum OX=262921 GN=C3L33_05542 PE=3 SV=1;tr|A0A834LXH2|A0A834LXH2_RHOSS Uncharacterized protein OS=Rhododendron simsii OX=118357 GN=RHSIM_Rhsim01G0025200 PE=3	22.8411	NaN	NaN	NaN	24.0469	NaN	58.727	120.55
tr|A0A076NBT0|A0A076NBT0_VACCO	tr|A0A076NBT0|A0A076NBT0_VACCO O-methyltransferase OS=Vaccinium corymbosum OX=69266 PE=2 SV=1	24.3464	NaN	NaN	25.6548	24.6317	24.8541	40.33	120.19
tr|A0A6A4KS97|A0A6A4KS97_9ERIC;tr|A0A834LCS5|A0A834LCS5_RHOSS	tr|A0A6A4KS97|A0A6A4KS97_9ERIC Sucrose-phosphatase (Fragment) OS=Rhododendron williamsianum OX=262921 GN=C3L33_17623 PE=3 SV=1;tr|A0A834LCS5|A0A834LCS5_RHOSS Sucrose-phosphatase OS=Rhododendron simsii OX=118357 GN=RHSIM_Rhsim09G0022800 PE=3 SV=1	25.6568	24.6021	24.6866	25.347	24.758	24.1555	48.584	117.38
tr|A0A6A4L5U5|A0A6A4L5U5_9ERIC;tr|A0A834LFS1|A0A834LFS1_RHOSS	tr|A0A6A4L5U5|A0A6A4L5U5_9ERIC HATPase_c domain-containing protein (Fragment) OS=Rhododendron williamsianum OX=262921 GN=C3L33_16978 PE=3 SV=1;tr|A0A834LFS1|A0A834LFS1_RHOSS HATPase_c domain-containing protein OS=Rhododendron simsii OX=118357 GN=RHSIM_Rhsi	25.971	25.8099	25.888	26.2399	25.8011	25.7047	85.798	117.38
tr|A0A6A4LMC4|A0A6A4LMC4_9ERIC;tr|A0A834H278|A0A834H278_RHOSS	tr|A0A6A4LMC4|A0A6A4LMC4_9ERIC Acylaminoacyl-peptidase (Fragment) OS=Rhododendron williamsianum OX=262921 GN=C3L33_12332 PE=3 SV=1;tr|A0A834H278|A0A834H278_RHOSS Acylaminoacyl-peptidase OS=Rhododendron simsii OX=118357 GN=RHSIM_Rhsim04G0195100 PE=3 SV=1	26.4604	NaN	26.2066	25.8586	NaN	NaN	87.717	117.37
tr|A0A6A4MAB1|A0A6A4MAB1_9ERIC;tr|A0A834LZF6|A0A834LZF6_RHOSS	tr|A0A6A4MAB1|A0A6A4MAB1_9ERIC Uncharacterized protein (Fragment) OS=Rhododendron williamsianum OX=262921 GN=C3L33_04644 PE=3 SV=1;tr|A0A834LZF6|A0A834LZF6_RHOSS Uncharacterized protein OS=Rhododendron simsii OX=118357 GN=RHSIM_Rhsim01G0213500 PE=3 SV=1	24.4967	24.3067	NaN	23.9574	NaN	23.6403	62.037	115.95
tr|A0A6A4KYX0|A0A6A4KYX0_9ERIC;tr|A0A834FV85|A0A834FV85_RHOSS	tr|A0A6A4KYX0|A0A6A4KYX0_9ERIC Ribos_L4_asso_C domain-containing protein (Fragment) OS=Rhododendron williamsianum OX=262921 GN=C3L33_20208 PE=3 SV=1;tr|A0A834FV85|A0A834FV85_RHOSS Ribos_L4_asso_C domain-containing protein OS=Rhododendron simsii OX=118357 G	26.8229	26.0674	NaN	NaN	25.4921	25.2694	43.244	115.85
tr|A0A834L8V9|A0A834L8V9_RHOSS;tr|A0A6A4LJJ5|A0A6A4LJJ5_9ERIC	tr|A0A834L8V9|A0A834L8V9_RHOSS AP-1 complex subunit gamma OS=Rhododendron simsii OX=118357 GN=RHSIM_Rhsim12G0047900 PE=3 SV=1;tr|A0A6A4LJJ5|A0A6A4LJJ5_9ERIC GAE domain-containing protein (Fragment) OS=Rhododendron williamsianum OX=262921 GN=C3L33_13500 PE=	24.1909	23.9035	24.6915	24.4308	NaN	24.418	95.936	113.46
tr|A0A834HCN3|A0A834HCN3_RHOSS;tr|A0A6A4M889|A0A6A4M889_9ERIC	tr|A0A834HCN3|A0A834HCN3_RHOSS Alanine--tRNA ligase OS=Rhododendron simsii OX=118357 GN=RHSIM_Rhsim03G0224600 PE=3 SV=1;tr|A0A6A4M889|A0A6A4M889_9ERIC Alanine--tRNA ligase (Fragment) OS=Rhododendron williamsianum OX=262921 GN=C3L33_03490 PE=3 SV=1	23.4625	NaN	23.9939	NaN	NaN	NaN	124.27	112.83
tr|A0A1J0A0R5|A0A1J0A0R5_RHOML;tr|A0A6A4KZE7|A0A6A4KZE7_9ERIC;tr|A0A6A4KUY8|A0A6A4KUY8_9ERIC;tr|A0A834G7T5|A0A834G7T5_RHOSS;tr|A0A834LNA7|A0A834LNA7_RHOSS	tr|A0A1J0A0R5|A0A1J0A0R5_RHOML RPL3 OS=Rhododendron molle OX=49168 GN=RPL3 PE=2 SV=1;tr|A0A6A4KZE7|A0A6A4KZE7_9ERIC Uncharacterized protein (Fragment) OS=Rhododendron williamsianum OX=262921 GN=C3L33_19794 PE=3 SV=1;tr|A0A6A4KUY8|A0A6A4KUY8_9ERIC Uncharact	26.4521	25.5649	NaN	NaN	25.8038	NaN	44.42	112.59
tr|A0A834FVF5|A0A834FVF5_RHOSS;tr|A0A834LDX1|A0A834LDX1_RHOSS	tr|A0A834FVF5|A0A834FVF5_RHOSS Glucose-6-phosphate 1-dehydrogenase OS=Rhododendron simsii OX=118357 GN=RHSIM_RhsimUnG0241400 PE=3 SV=1;tr|A0A834LDX1|A0A834LDX1_RHOSS Glucose-6-phosphate 1-dehydrogenase OS=Rhododendron simsii OX=118357 GN=RHSIM_Rhsim10G0011	25.8597	25.7314	25.331	25.6563	24.1772	25.0965	59.291	111.36
tr|A0A6A4LXB5|A0A6A4LXB5_9ERIC	tr|A0A6A4LXB5|A0A6A4LXB5_9ERIC Aminotran_1_2 domain-containing protein (Fragment) OS=Rhododendron williamsianum OX=262921 GN=C3L33_08098 PE=3 SV=1	26.0274	26.0507	NaN	NaN	NaN	NaN	51.59	110.56
tr|A0A834HN43|A0A834HN43_RHOSS;tr|A0A6A4L9F4|A0A6A4L9F4_9ERIC;tr|A0A834G5A9|A0A834G5A9_RHOSS	tr|A0A834HN43|A0A834HN43_RHOSS Pyruvate kinase OS=Rhododendron simsii OX=118357 GN=RHSIM_Rhsim02G0031500 PE=3 SV=1;tr|A0A6A4L9F4|A0A6A4L9F4_9ERIC Pyruvate kinase (Fragment) OS=Rhododendron williamsianum OX=262921 GN=C3L33_15019 PE=3 SV=1	22.2915	22.458	NaN	NaN	NaN	NaN	62.929	109.8
tr|A0A6A4KSJ7|A0A6A4KSJ7_9ERIC;tr|A0A834GI64|A0A834GI64_RHOSS;tr|A0A0G3FEC2|A0A0G3FEC2_VACCO;tr|A0A8F5V7A4|A0A8F5V7A4_9ERIC	tr|A0A6A4KSJ7|A0A6A4KSJ7_9ERIC Fe2OG dioxygenase domain-containing protein (Fragment) OS=Rhododendron williamsianum OX=262921 GN=C3L33_22031 PE=3 SV=1;tr|A0A834GI64|A0A834GI64_RHOSS Fe2OG dioxygenase domain-containing protein OS=Rhododendron simsii OX=1183	NaN	NaN	NaN	NaN	25.5416	25.2302	42.587	109.73
tr|A0A834L814|A0A834L814_RHOSS;tr|A0A834G1P2|A0A834G1P2_RHOSS	tr|A0A834L814|A0A834L814_RHOSS Aldehyde dehydrogenase (NAD(+)) OS=Rhododendron simsii OX=118357 GN=RHSIM_Rhsim12G0211100 PE=3 SV=1;tr|A0A834G1P2|A0A834G1P2_RHOSS Aldehyde dehydrogenase (NAD(+)) OS=Rhododendron simsii OX=118357 GN=RHSIM_Rhsim12G0210700 PE=3	25.9853	26.4993	NaN	25.6251	25.5327	25.7046	54.735	109.46
tr|A0A6A4LSR1|A0A6A4LSR1_9ERIC	tr|A0A6A4LSR1|A0A6A4LSR1_9ERIC Uncharacterized protein (Fragment) OS=Rhododendron williamsianum OX=262921 GN=C3L33_04118 PE=4 SV=1	26.8123	26.7867	27.7366	27.5003	28.1873	28.36	72.19	108.89
tr|A0A834G8Y2|A0A834G8Y2_RHOSS;tr|A0A6A4L2V2|A0A6A4L2V2_9ERIC;tr|A0A6A4L3I7|A0A6A4L3I7_9ERIC;tr|A0A834LEQ5|A0A834LEQ5_RHOSS;REV__tr|A0A834L8L2|A0A834L8L2_RHOSS;REV__tr|A0A6A4LGN9|A0A6A4LGN9_9ERIC	tr|A0A834G8Y2|A0A834G8Y2_RHOSS Glutamate decarboxylase OS=Rhododendron simsii OX=118357 GN=RHSIM_Rhsim10G0183700 PE=3 SV=1;tr|A0A6A4L2V2|A0A6A4L2V2_9ERIC Glutamate decarboxylase (Fragment) OS=Rhododendron williamsianum OX=262921 GN=C3L33_17969 PE=3 SV=1	26.1625	26.3197	25.9237	25.6216	26.1362	25.8477	54.997	108.35
tr|A0A6A4L4C5|A0A6A4L4C5_9ERIC;tr|A0A834GJ52|A0A834GJ52_RHOSS	tr|A0A6A4L4C5|A0A6A4L4C5_9ERIC Phosphoenolpyruvate carboxylase (Fragment) OS=Rhododendron williamsianum OX=262921 GN=C3L33_17031 PE=3 SV=1;tr|A0A834GJ52|A0A834GJ52_RHOSS Phosphoenolpyruvate carboxylase OS=Rhododendron simsii OX=118357 GN=RHSIM_Rhsim09G0114	25.1401	NaN	24.2285	24.4378	24.0055	24.5158	115.07	107.13
tr|A0A834GA44|A0A834GA44_RHOSS;tr|A0A6A4L2U1|A0A6A4L2U1_9ERIC;tr|A0A834GFV8|A0A834GFV8_RHOSS	tr|A0A834GA44|A0A834GA44_RHOSS ATP synthase subunit beta OS=Rhododendron simsii OX=118357 GN=RHSIM_Rhsim10G0077400 PE=3 SV=1;tr|A0A6A4L2U1|A0A6A4L2U1_9ERIC ATP synthase subunit beta (Fragment) OS=Rhododendron williamsianum OX=262921 GN=C3L33_18617 PE=3 SV=	NaN	23.8441	NaN	NaN	25.1551	NaN	59.124	106.26
tr|A0A834GKP0|A0A834GKP0_RHOSS;tr|A0A6A4LHR3|A0A6A4LHR3_9ERIC;tr|A0A834HK56|A0A834HK56_RHOSS;tr|A0A6A4MAG6|A0A6A4MAG6_9ERIC	tr|A0A834GKP0|A0A834GKP0_RHOSS Protein kinase domain-containing protein OS=Rhododendron simsii OX=118357 GN=RHSIM_Rhsim07G0011800 PE=3 SV=1;tr|A0A6A4LHR3|A0A6A4LHR3_9ERIC Protein kinase domain-containing protein (Fragment) OS=Rhododendron williamsianum OX=	24.4233	24.657	25.2483	24.1657	23.5849	24.1075	45.417	104.45
tr|A0A834LZ41|A0A834LZ41_RHOSS;tr|A0A6A4M9V2|A0A6A4M9V2_9ERIC;tr|A0A834HV20|A0A834HV20_RHOSS;tr|A0A6A4M7G6|A0A6A4M7G6_9ERIC;tr|A0A6A4M1L9|A0A6A4M1L9_9ERIC;tr|A0A6A4KJ53|A0A6A4KJ53_9ERIC;tr|A0A834HBP1|A0A834HBP1_RHOSS	tr|A0A834LZ41|A0A834LZ41_RHOSS Uncharacterized protein OS=Rhododendron simsii OX=118357 GN=RHSIM_Rhsim01G0196200 PE=3 SV=1;tr|A0A6A4M9V2|A0A6A4M9V2_9ERIC Uncharacterized protein (Fragment) OS=Rhododendron williamsianum OX=262921 GN=C3L33_04792 PE=3 SV=1;tr	24.7248	NaN	24.6069	NaN	NaN	NaN	102.43	103.55
tr|A0A6A4LIB4|A0A6A4LIB4_9ERIC;tr|A0A834G2S7|A0A834G2S7_RHOSS	tr|A0A6A4LIB4|A0A6A4LIB4_9ERIC Uncharacterized protein (Fragment) OS=Rhododendron williamsianum OX=262921 GN=C3L33_13953 PE=3 SV=1	26.8606	28.0061	24.9671	28.4664	27.8765	27.5399	43.025	103.23
tr|A0A834GQ77|A0A834GQ77_RHOSS;tr|A0A6A4LHI9|A0A6A4LHI9_9ERIC	tr|A0A834GQ77|A0A834GQ77_RHOSS Pyrophosphate--fructose 6-phosphate 1-phosphotransferase subunit alpha OS=Rhododendron simsii OX=118357 GN=PFP-ALPHA PE=3 SV=1	24.3915	24.0206	NaN	24.0584	NaN	25.3814	66.582	100.95
tr|A0A834H9N1|A0A834H9N1_RHOSS;tr|A0A6A4MDE0|A0A6A4MDE0_9ERIC	tr|A0A834H9N1|A0A834H9N1_RHOSS Uncharacterized protein OS=Rhododendron simsii OX=118357 GN=RHSIM_Rhsim03G0022100 PE=4 SV=1;tr|A0A6A4MDE0|A0A6A4MDE0_9ERIC Uncharacterized protein (Fragment) OS=Rhododendron williamsianum OX=262921 GN=C3L33_02043 PE=4 SV=1	24.2433	NaN	23.9416	NaN	NaN	NaN	60.407	98.94
tr|A0A834G500|A0A834G500_RHOSS;tr|A0A6A4L8T9|A0A6A4L8T9_9ERIC;tr|A0A6A4L2V9|A0A6A4L2V9_9ERIC;tr|A0A834G4S9|A0A834G4S9_RHOSS	tr|A0A834G500|A0A834G500_RHOSS Pyruvate dehydrogenase E1 component subunit alpha OS=Rhododendron simsii OX=118357 GN=RHSIM_Rhsim12G0052000 PE=4 SV=1;tr|A0A6A4L8T9|A0A6A4L8T9_9ERIC E1_dh domain-containing protein (Fragment) OS=Rhododendron williamsianum OX=	24.5644	25.1471	23.1966	25.1862	24.9056	25.1191	46.712	96.61
tr|A0A834LMS1|A0A834LMS1_RHOSS;tr|A0A6A4LKJ1|A0A6A4LKJ1_9ERIC;tr|A0A834LRD6|A0A834LRD6_RHOSS;tr|A0A834H544|A0A834H544_RHOSS;tr|A0A6A4LPW5|A0A6A4LPW5_9ERIC	tr|A0A834LMS1|A0A834LMS1_RHOSS Tryptophan synthase OS=Rhododendron simsii OX=118357 GN=RHSIM_Rhsim06G0214300 PE=3 SV=1;tr|A0A6A4LKJ1|A0A6A4LKJ1_9ERIC Tryptophan synthase (Fragment) OS=Rhododendron williamsianum OX=262921 GN=C3L33_09880 PE=3 SV=1;tr|A0A834L	NaN	NaN	NaN	23.5426	NaN	24.0218	44.435	96.159
tr|A0A834GJX6|A0A834GJX6_RHOSS;tr|A0A834FV17|A0A834FV17_RHOSS;tr|A0A834GI92|A0A834GI92_RHOSS	tr|A0A834GJX6|A0A834GJX6_RHOSS Uncharacterized protein OS=Rhododendron simsii OX=118357 GN=RHSIM_Rhsim08G0192300 PE=3 SV=1;tr|A0A834FV17|A0A834FV17_RHOSS Uncharacterized protein OS=Rhododendron simsii OX=118357 GN=RHSIM_RhsimUnG0162400 PE=3 SV=1;tr|A0A834G	NaN	NaN	NaN	NaN	26.1659	26.143	35.825	94.733
tr|A0A834LIZ7|A0A834LIZ7_RHOSS;tr|A0A6A4LU60|A0A6A4LU60_9ERIC	tr|A0A834LIZ7|A0A834LIZ7_RHOSS Peptidase A1 domain-containing protein OS=Rhododendron simsii OX=118357 GN=RHSIM_Rhsim07G0067500 PE=3 SV=1;tr|A0A6A4LU60|A0A6A4LU60_9ERIC Peptidase A1 domain-containing protein (Fragment) OS=Rhododendron williamsianum OX=2629	26.165	27.8626	NaN	27.458	26.5785	26.3701	47.472	94.104
tr|A0A6A4L0A7|A0A6A4L0A7_9ERIC;tr|A0A834LFR9|A0A834LFR9_RHOSS	tr|A0A6A4L0A7|A0A6A4L0A7_9ERIC W2 domain-containing protein (Fragment) OS=Rhododendron williamsianum OX=262921 GN=C3L33_16910 PE=3 SV=1;tr|A0A834LFR9|A0A834LFR9_RHOSS W2 domain-containing protein OS=Rhododendron simsii OX=118357 GN=RHSIM_Rhsim09G0130400 PE	NaN	22.6187	NaN	22.2461	23.259	NaN	53.667	93.468
tr|A0A6A4KYB1|A0A6A4KYB1_9ERIC;tr|A0A834LFX9|A0A834LFX9_RHOSS;tr|A0A834GDU7|A0A834GDU7_RHOSS;tr|A0A834GB03|A0A834GB03_RHOSS;tr|A0A6A4KR19|A0A6A4KR19_9ERIC	tr|A0A6A4KYB1|A0A6A4KYB1_9ERIC Guanosine nucleotide diphosphate dissociation inhibitor (Fragment) OS=Rhododendron williamsianum OX=262921 GN=C3L33_17587 PE=3 SV=1;tr|A0A834LFX9|A0A834LFX9_RHOSS Guanosine nucleotide diphosphate dissociation inhibitor OS=Rho	24.92	25.0632	24.8064	24.3535	24.1348	24.7876	46.155	91.488
tr|A0A834LPW2|A0A834LPW2_RHOSS;tr|A0A6A4LBQ1|A0A6A4LBQ1_9ERIC;tr|A0A6A4M5R7|A0A6A4M5R7_9ERIC;tr|A0A834H3Q3|A0A834H3Q3_RHOSS;tr|A0A6A4M5X1|A0A6A4M5X1_9ERIC;tr|A0A834FWW1|A0A834FWW1_RHOSS;tr|A0A834GCH4|A0A834GCH4_RHOSS	tr|A0A834LPW2|A0A834LPW2_RHOSS Pyruvate kinase OS=Rhododendron simsii OX=118357 GN=RHSIM_Rhsim04G0136600 PE=3 SV=1;tr|A0A6A4LBQ1|A0A6A4LBQ1_9ERIC Pyruvate kinase (Fragment) OS=Rhododendron williamsianum OX=262921 GN=C3L33_12355 PE=3 SV=1;tr|A0A6A4M5R7|A0A6	21.4221	22.2764	22.5772	NaN	23.4424	22.0894	57.496	91.155
tr|A0A834LM48|A0A834LM48_RHOSS;tr|A0A6A4KXD8|A0A6A4KXD8_9ERIC;tr|A0A834GX97|A0A834GX97_RHOSS;tr|A0A6A4LFE7|A0A6A4LFE7_9ERIC;tr|A0A834GXP5|A0A834GXP5_RHOSS	tr|A0A834LM48|A0A834LM48_RHOSS Asparagine--tRNA ligase OS=Rhododendron simsii OX=118357 GN=RHSIM_Rhsim05G0030300 PE=3 SV=1	25.682	NaN	25.894	25.2902	25.4214	25.7558	63.524	90.96
tr|A0A6A4LKF0|A0A6A4LKF0_9ERIC;tr|A0A834GLB4|A0A834GLB4_RHOSS	tr|A0A6A4LKF0|A0A6A4LKF0_9ERIC Peptidase A1 domain-containing protein (Fragment) OS=Rhododendron williamsianum OX=262921 GN=C3L33_09234 PE=3 SV=1;tr|A0A834GLB4|A0A834GLB4_RHOSS Peptidase A1 domain-containing protein OS=Rhododendron simsii OX=118357 GN=RHSI	26.7462	27.1142	27.9137	27.7712	28.7287	28.3323	41.749	87.88
tr|A0A6A4MB24|A0A6A4MB24_9ERIC;tr|A0A834LV54|A0A834LV54_RHOSS	tr|A0A6A4MB24|A0A6A4MB24_9ERIC Peptidylprolyl isomerase (Fragment) OS=Rhododendron williamsianum OX=262921 GN=C3L33_04382 PE=4 SV=1;tr|A0A834LV54|A0A834LV54_RHOSS Peptidylprolyl isomerase OS=Rhododendron simsii OX=118357 GN=RHSIM_Rhsim01G0249900 PE=4 SV=1	24.7256	24.5481	23.0479	24.2244	NaN	25.2264	64.016	87.365
tr|A0A834LUR2|A0A834LUR2_RHOSS;tr|A0A6A4MBT2|A0A6A4MBT2_9ERIC;tr|A0A834HJL8|A0A834HJL8_RHOSS;tr|A0A6A4M776|A0A6A4M776_9ERIC	tr|A0A834LUR2|A0A834LUR2_RHOSS 60S ribosomal protein L13 OS=Rhododendron simsii OX=118357 GN=RHSIM_Rhsim03G0219500 PE=3 SV=1;tr|A0A6A4MBT2|A0A6A4MBT2_9ERIC 60S ribosomal protein L13 (Fragment) OS=Rhododendron williamsianum OX=262921 GN=C3L33_03444 PE=3 SV=	23.4936	24.1893	23.5267	NaN	NaN	24.0557	23.861	87.053
tr|A0A834LWL5|A0A834LWL5_RHOSS;tr|A0A6A4LZ88|A0A6A4LZ88_9ERIC;tr|A0A834HC70|A0A834HC70_RHOSS;tr|A0A834HAD9|A0A834HAD9_RHOSS;tr|A0A1J0A0N4|A0A1J0A0N4_RHOML;tr|I1U4K9|I1U4K9_9ERIC;tr|A0A834H8C8|A0A834H8C8_RHOSS;tr|A0A834H9L9|A0A834H9L9_RHOSS;tr|A0A6A4LDX6|A0A6A4LDX6_9ERIC;tr|A0A6A4LMP1|A0A6A4LMP1_9ERIC;tr|A0A6A4KZH1|A0A6A4KZH1_9ERIC;tr|A0A6A4L8Z0|A0A6A4L8Z0_9ERIC;tr|A0A6A4MBW9|A0A6A4MBW9_9ERIC	tr|A0A834LWL5|A0A834LWL5_RHOSS Elongation factor 1-alpha OS=Rhododendron simsii OX=118357 GN=RHSIM_Rhsim01G0219100 PE=3 SV=1;tr|A0A6A4LZ88|A0A6A4LZ88_9ERIC Elongation factor 1-alpha (Fragment) OS=Rhododendron williamsianum OX=262921 GN=C3L33_04637 PE=3 SV=	28.2765	27.912	27.3664	27.6712	27.4272	27.2578	49.484	86.411
tr|A0A6A4M707|A0A6A4M707_9ERIC;tr|A0A834GJU7|A0A834GJU7_RHOSS;tr|A0A834GP77|A0A834GP77_RHOSS;tr|A0A834GM52|A0A834GM52_RHOSS	tr|A0A6A4M707|A0A6A4M707_9ERIC DHQ_synthase domain-containing protein (Fragment) OS=Rhododendron williamsianum OX=262921 GN=C3L33_01726 PE=3 SV=1;tr|A0A834GJU7|A0A834GJU7_RHOSS DHQ_synthase domain-containing protein OS=Rhododendron simsii OX=118357 GN=RHSI	NaN	NaN	NaN	NaN	24.0928	23.9767	45.566	86.376
tr|A0A834LDN9|A0A834LDN9_RHOSS;tr|A0A6A4L0U5|A0A6A4L0U5_9ERIC	tr|A0A834LDN9|A0A834LDN9_RHOSS PKS_ER domain-containing protein OS=Rhododendron simsii OX=118357 GN=RHSIM_Rhsim09G0195700 PE=3 SV=1	27.8759	27.7624	28.4481	27.4656	26.5217	26.5629	38.979	86.017
tr|A0A6A4LM51|A0A6A4LM51_9ERIC;tr|A0A834FZE9|A0A834FZE9_RHOSS	tr|A0A6A4LM51|A0A6A4LM51_9ERIC Pectin acetylesterase (Fragment) OS=Rhododendron williamsianum OX=262921 GN=C3L33_08971 PE=3 SV=1	26.1084	26.7882	26.0775	26.5241	26.2186	26.6562	33.959	84.22
tr|A0A834FWC3|A0A834FWC3_RHOSS;tr|A0A6A4KUJ9|A0A6A4KUJ9_9ERIC	tr|A0A834FWC3|A0A834FWC3_RHOSS Aminotran_1_2 domain-containing protein OS=Rhododendron simsii OX=118357 GN=RHSIM_RhsimUnG0094700 PE=4 SV=1;tr|A0A6A4KUJ9|A0A6A4KUJ9_9ERIC Aminotran_1_2 domain-containing protein (Fragment) OS=Rhododendron williamsianum OX=26	24.8606	25.0534	NaN	25.4769	25.1409	25.425	48.996	84.157
tr|A0A834G7L1|A0A834G7L1_RHOSS	tr|A0A834G7L1|A0A834G7L1_RHOSS Fructose-bisphosphate aldolase OS=Rhododendron simsii OX=118357 GN=RHSIM_Rhsim11G0183800 PE=3 SV=1	28.8926	27.877	28.0517	27.015	26.8077	26.8442	41.983	83.78
tr|A0A834H8M9|A0A834H8M9_RHOSS;tr|A0A6A4LMW5|A0A6A4LMW5_9ERIC	tr|A0A834H8M9|A0A834H8M9_RHOSS Fructose-bisphosphate aldolase OS=Rhododendron simsii OX=118357 GN=RHSIM_Rhsim04G0009800 PE=3 SV=1	28.676	29.7214	NaN	NaN	29.3058	29.7276	38.393	83.71
tr|A0A834GV24|A0A834GV24_RHOSS	tr|A0A834GV24|A0A834GV24_RHOSS Peptidase_S9 domain-containing protein OS=Rhododendron simsii OX=118357 GN=RHSIM_Rhsim06G0046300 PE=4 SV=1	24.4732	25.7757	25.7074	NaN	NaN	25.1171	86.402	83.377
tr|A0A834G776|A0A834G776_RHOSS;tr|A0A6A4LI37|A0A6A4LI37_9ERIC	tr|A0A834G776|A0A834G776_RHOSS Tryptophanyl-tRNA synthetase OS=Rhododendron simsii OX=118357 GN=RHSIM_Rhsim12G0003500 PE=3 SV=1;tr|A0A6A4LI37|A0A6A4LI37_9ERIC Tryptophanyl-tRNA synthetase (Fragment) OS=Rhododendron williamsianum OX=262921 GN=C3L33_13173 PE	24.4711	23.8361	NaN	NaN	NaN	23.4919	50.738	83.34
tr|A0A834LA35|A0A834LA35_RHOSS;tr|A0A6A4LD56|A0A6A4LD56_9ERIC;tr|A0A6A4KP57|A0A6A4KP57_9ERIC	tr|A0A834LA35|A0A834LA35_RHOSS Uncharacterized protein OS=Rhododendron simsii OX=118357 GN=RHSIM_Rhsim12G0136400 PE=3 SV=1;tr|A0A6A4LD56|A0A6A4LD56_9ERIC Uncharacterized protein (Fragment) OS=Rhododendron williamsianum OX=262921 GN=C3L33_14136 PE=3 SV=1	24.791	NaN	24.1758	24.8771	26.3011	24.8929	123.03	82.898
tr|A0A834H781|A0A834H781_RHOSS;tr|A0A834LIJ6|A0A834LIJ6_RHOSS;tr|A0A6A4LEN1|A0A6A4LEN1_9ERIC;tr|A0A834GU17|A0A834GU17_RHOSS;tr|A0A834GWM7|A0A834GWM7_RHOSS;tr|A0A834GB27|A0A834GB27_RHOSS;tr|A0A6A4L1U1|A0A6A4L1U1_9ERIC	tr|A0A834H781|A0A834H781_RHOSS Aldedh domain-containing protein OS=Rhododendron simsii OX=118357 GN=RHSIM_Rhsim03G0256500 PE=3 SV=1;tr|A0A834LIJ6|A0A834LIJ6_RHOSS Aldedh domain-containing protein OS=Rhododendron simsii OX=118357 GN=RHSIM_Rhsim07G0163900 PE	24.2559	24.0889	NaN	NaN	24.4369	NaN	53.115	82.404
tr|A0A834H419|A0A834H419_RHOSS;tr|A0A6A4MEE4|A0A6A4MEE4_9ERIC	tr|A0A834H419|A0A834H419_RHOSS Malate dehydrogenase [NADP], chloroplastic OS=Rhododendron simsii OX=118357 GN=RHSIM_Rhsim03G0111900 PE=3 SV=1	NaN	NaN	25.0592	25.119	24.5756	23.9461	47.841	81.843
tr|A0A6A4MJ14|A0A6A4MJ14_9ERIC;tr|A0A834LXI1|A0A834LXI1_RHOSS	tr|A0A6A4MJ14|A0A6A4MJ14_9ERIC Uncharacterized protein (Fragment) OS=Rhododendron williamsianum OX=262921 GN=C3L33_02156 PE=3 SV=1	NaN	NaN	NaN	25.746	26.2505	26.3573	142.66	81.34
tr|A0A6A4LY36|A0A6A4LY36_9ERIC;tr|A0A834HG76|A0A834HG76_RHOSS;tr|A0A6A4L9J2|A0A6A4L9J2_9ERIC;tr|A0A834H1R6|A0A834H1R6_RHOSS	tr|A0A6A4LY36|A0A6A4LY36_9ERIC RRM domain-containing protein (Fragment) OS=Rhododendron williamsianum OX=262921 GN=C3L33_05083 PE=3 SV=1;tr|A0A834HG76|A0A834HG76_RHOSS RRM domain-containing protein OS=Rhododendron simsii OX=118357 GN=RHSIM_Rhsim01G0145200	NaN	NaN	24.6035	NaN	25.1024	24.3378	82.009	80.614
tr|A0A834LHP6|A0A834LHP6_RHOSS;tr|A0A6A4MLR0|A0A6A4MLR0_9ERIC	tr|A0A834LHP6|A0A834LHP6_RHOSS Isocitrate dehydrogenase [NADP] OS=Rhododendron simsii OX=118357 GN=RHSIM_Rhsim08G0052400 PE=3 SV=1;tr|A0A6A4MLR0|A0A6A4MLR0_9ERIC Isocitrate dehydrogenase (NADP(+)) (Fragment) OS=Rhododendron williamsianum OX=262921 GN=C3L33	27.5027	26.8858	26.3954	27.159	27.3229	27.3204	53.248	78.7
tr|A0A6A4M353|A0A6A4M353_9ERIC;tr|A0A834LTR7|A0A834LTR7_RHOSS	tr|A0A6A4M353|A0A6A4M353_9ERIC Uncharacterized protein (Fragment) OS=Rhododendron williamsianum OX=262921 GN=C3L33_04247 PE=3 SV=1;tr|A0A834LTR7|A0A834LTR7_RHOSS Uncharacterized protein OS=Rhododendron simsii OX=118357 GN=RHSIM_Rhsim01G0263300 PE=3 SV=1	27.2147	27.6088	27.021	26.5683	27.4629	27.9779	51.618	78.31
tr|A0A834LKG0|A0A834LKG0_RHOSS;tr|A0A6A4LYY1|A0A6A4LYY1_9ERIC	tr|A0A834LKG0|A0A834LKG0_RHOSS Pyr_redox_2 domain-containing protein OS=Rhododendron simsii OX=118357 GN=RHSIM_Rhsim07G0087700 PE=4 SV=1;tr|A0A6A4LYY1|A0A6A4LYY1_9ERIC Pyr_redox_2 domain-containing protein (Fragment) OS=Rhododendron williamsianum OX=262921	24.6524	23.9531	NaN	NaN	23.54	23.3827	54.106	77.072
tr|A0A6A4LTT7|A0A6A4LTT7_9ERIC;tr|A0A834H780|A0A834H780_RHOSS	tr|A0A6A4LTT7|A0A6A4LTT7_9ERIC ECH_2 domain-containing protein (Fragment) OS=Rhododendron williamsianum OX=262921 GN=C3L33_03661 PE=4 SV=1;tr|A0A834H780|A0A834H780_RHOSS ECH_2 domain-containing protein OS=Rhododendron simsii OX=118357 GN=RHSIM_Rhsim03G0244	NaN	26.0395	NaN	NaN	NaN	25.8449	47.166	76.847
tr|A0A834LF82|A0A834LF82_RHOSS	tr|A0A834LF82|A0A834LF82_RHOSS Alpha-galactosidase OS=Rhododendron simsii OX=118357 GN=RHSIM_Rhsim09G0025700 PE=3 SV=1	NaN	NaN	24.9418	24.6902	25.0141	24.9291	44.831	75.619
tr|A0A834H2F3|A0A834H2F3_RHOSS;tr|A0A834LQI9|A0A834LQI9_RHOSS;tr|A0A6A4KVW0|A0A6A4KVW0_9ERIC;tr|A0A6A4L0K5|A0A6A4L0K5_9ERIC	tr|A0A834H2F3|A0A834H2F3_RHOSS Isoleucyl-tRNA synthetase OS=Rhododendron simsii OX=118357 GN=RHSIM_Rhsim05G0075700 PE=3 SV=1	26.2096	NaN	25.4309	25.9121	25.4	25.5824	144.02	75.214
tr|A0A834G7H2|A0A834G7H2_RHOSS;tr|A0A6A4M7V2|A0A6A4M7V2_9ERIC	tr|A0A834G7H2|A0A834G7H2_RHOSS Acyl-coenzyme A oxidase OS=Rhododendron simsii OX=118357 GN=RHSIM_Rhsim11G0003700 PE=3 SV=1;tr|A0A6A4M7V2|A0A6A4M7V2_9ERIC ACOX domain-containing protein (Fragment) OS=Rhododendron williamsianum OX=262921 GN=C3L33_05235 PE=3	23.696	24.8235	NaN	NaN	NaN	NaN	87.934	74.545
tr|A0A834GR00|A0A834GR00_RHOSS;tr|A0A6A4LHM4|A0A6A4LHM4_9ERIC	tr|A0A834GR00|A0A834GR00_RHOSS Malic enzyme OS=Rhododendron simsii OX=118357 GN=RHSIM_Rhsim07G0018800 PE=3 SV=1;tr|A0A6A4LHM4|A0A6A4LHM4_9ERIC Malic enzyme (Fragment) OS=Rhododendron williamsianum OX=262921 GN=C3L33_08008 PE=3 SV=1	23.8938	24.7253	NaN	24.2862	NaN	NaN	66.637	74.213
tr|A0A6A4LUE6|A0A6A4LUE6_9ERIC;tr|A0A834FYV5|A0A834FYV5_RHOSS;tr|A0A834FW55|A0A834FW55_RHOSS	tr|A0A6A4LUE6|A0A6A4LUE6_9ERIC Fumarylacetoacetase (Fragment) OS=Rhododendron williamsianum OX=262921 GN=C3L33_06478 PE=3 SV=1;tr|A0A834FYV5|A0A834FYV5_RHOSS Fumarylacetoacetase OS=Rhododendron simsii OX=118357 GN=RHSIM_Rhsim13G0146300 PE=3 SV=1;tr|A0A834F	26.5829	26.582	26.7684	26.7015	26.8032	26.4396	43.516	73.849
tr|A0A834LK28|A0A834LK28_RHOSS;tr|A0A834FZ38|A0A834FZ38_RHOSS;tr|A9ZMJ3|A9ZMJ3_9ERIC;tr|A0A385ZAE6|A0A385ZAE6_VACCO;tr|A0A6A4KPR3|A0A6A4KPR3_9ERIC	tr|A0A834LK28|A0A834LK28_RHOSS Fe2OG dioxygenase domain-containing protein OS=Rhododendron simsii OX=118357 GN=RHSIM_Rhsim07G0247500 PE=3 SV=1;tr|A0A834FZ38|A0A834FZ38_RHOSS Fe2OG dioxygenase domain-containing protein OS=Rhododendron simsii OX=118357 GN=RH	NaN	NaN	NaN	NaN	25.3374	25.178	40.553	72.396
tr|A0A834HND6|A0A834HND6_RHOSS;tr|A0A834H9C8|A0A834H9C8_RHOSS;tr|A0A6A4L8U0|A0A6A4L8U0_9ERIC	tr|A0A834HND6|A0A834HND6_RHOSS Protein kinase domain-containing protein OS=Rhododendron simsii OX=118357 GN=RHSIM_Rhsim02G0075300 PE=4 SV=1	NaN	NaN	24.1016	NaN	25.3997	25.2158	37.273	72.173
tr|A0A834LIC4|A0A834LIC4_RHOSS;tr|A0A6A4LZT4|A0A6A4LZT4_9ERIC	tr|A0A834LIC4|A0A834LIC4_RHOSS Transketolase OS=Rhododendron simsii OX=118357 GN=RHSIM_Rhsim07G0028800 PE=3 SV=1;tr|A0A6A4LZT4|A0A6A4LZT4_9ERIC Transketolase (Fragment) OS=Rhododendron williamsianum OX=262921 GN=C3L33_08092 PE=3 SV=1	25.2116	25.7736	25.545	NaN	NaN	24.5168	80.175	71.834
tr|A0A6A4L444|A0A6A4L444_9ERIC;tr|A0A834HBC9|A0A834HBC9_RHOSS;tr|A0A834LQ17|A0A834LQ17_RHOSS;tr|A0A834L9X3|A0A834L9X3_RHOSS;tr|A0A834GVA6|A0A834GVA6_RHOSS	tr|A0A6A4L444|A0A6A4L444_9ERIC Uncharacterized protein (Fragment) OS=Rhododendron williamsianum OX=262921 GN=C3L33_15155 PE=3 SV=1;tr|A0A834HBC9|A0A834HBC9_RHOSS Uncharacterized protein OS=Rhododendron simsii OX=118357 GN=RHSIM_Rhsim02G0053400 PE=3 SV=1	NaN	NaN	NaN	NaN	24.2151	24.0179	46.9	71.449
tr|A0A6A4LNT2|A0A6A4LNT2_9ERIC;tr|A0A834GKM5|A0A834GKM5_RHOSS;tr|A0A6A4MN10|A0A6A4MN10_9ERIC	tr|A0A6A4LNT2|A0A6A4LNT2_9ERIC PCI domain-containing protein (Fragment) OS=Rhododendron williamsianum OX=262921 GN=C3L33_11850 PE=4 SV=1;tr|A0A834GKM5|A0A834GKM5_RHOSS PCI domain-containing protein OS=Rhododendron simsii OX=118357 GN=RHSIM_Rhsim08G0185100	24.9233	25.9384	NaN	NaN	NaN	25.4214	44.32	70.849
tr|A0A6A4KG27|A0A6A4KG27_9ERIC;tr|A0A834G8B8|A0A834G8B8_RHOSS	tr|A0A6A4KG27|A0A6A4KG27_9ERIC Uncharacterized protein (Fragment) OS=Rhododendron williamsianum OX=262921 GN=C3L33_20790 PE=4 SV=1;tr|A0A834G8B8|A0A834G8B8_RHOSS Coatomer subunit alpha OS=Rhododendron simsii OX=118357 GN=RHSIM_Rhsim11G0182000 PE=4 SV=1	26.3161	26.0894	26.7705	26.85	26.6679	26.627	139.95	69.616
tr|A0A6A4KFZ4|A0A6A4KFZ4_9ERIC	tr|A0A6A4KFZ4|A0A6A4KFZ4_9ERIC D-fructose-1,6-bisphosphate 1-phosphohydrolase (Fragment) OS=Rhododendron williamsianum OX=262921 GN=C3L33_21108 PE=3 SV=1	21.7543	22.1723	NaN	21.4228	21.264	21.0011	43.319	67.513
tr|A0A834H854|A0A834H854_RHOSS;tr|A0A6A4LM55|A0A6A4LM55_9ERIC;tr|A0A834GXP6|A0A834GXP6_RHOSS;tr|A0A6A4KV13|A0A6A4KV13_9ERIC	tr|A0A834H854|A0A834H854_RHOSS Isocitrate dehydrogenase [NAD] subunit, mitochondrial OS=Rhododendron simsii OX=118357 GN=RHSIM_Rhsim04G0145600 PE=3 SV=1;tr|A0A6A4LM55|A0A6A4LM55_9ERIC Isocitrate dehydrogenase [NAD] subunit, mitochondrial (Fragment) OS=Rhod	26.5496	26.5708	26.3026	26.6181	27.2006	27.514	35.371	67.396
tr|A0A6A4LX36|A0A6A4LX36_9ERIC;tr|A0A6A4KPT1|A0A6A4KPT1_9ERIC;tr|A0A834LR25|A0A834LR25_RHOSS	tr|A0A6A4LX36|A0A6A4LX36_9ERIC E1 ubiquitin-activating enzyme (Fragment) OS=Rhododendron williamsianum OX=262921 GN=C3L33_07116 PE=3 SV=1	25.8188	NaN	25.8111	NaN	NaN	NaN	110.81	67.16
tr|A0A834G6X0|A0A834G6X0_RHOSS;tr|A0A6A4KCA0|A0A6A4KCA0_9ERIC	tr|A0A834G6X0|A0A834G6X0_RHOSS Tr-type G domain-containing protein OS=Rhododendron simsii OX=118357 GN=RHSIM_Rhsim11G0045300 PE=3 SV=1;tr|A0A6A4KCA0|A0A6A4KCA0_9ERIC Tr-type G domain-containing protein (Fragment) OS=Rhododendron williamsianum OX=262921 GN=	23.4904	24.4627	NaN	24.2058	NaN	NaN	94	65.737
tr|A0A6A4LS19|A0A6A4LS19_9ERIC;tr|A0A834L759|A0A834L759_RHOSS;tr|A0A834HHQ2|A0A834HHQ2_RHOSS;tr|A0A6A4MAY8|A0A6A4MAY8_9ERIC	tr|A0A6A4LS19|A0A6A4LS19_9ERIC Succinate-CoA ligase subunit beta (Fragment) OS=Rhododendron williamsianum OX=262921 GN=C3L33_07373 PE=3 SV=1;tr|A0A834L759|A0A834L759_RHOSS Succinate--CoA ligase [ADP-forming] subunit beta, mitochondrial OS=Rhododendron sims	26.9583	26.8812	28.4608	27.0764	26.8377	26.7471	45.09	65.295
tr|A0A834L8C4|A0A834L8C4_RHOSS;tr|A0A6A4L8S1|A0A6A4L8S1_9ERIC;tr|A0A834L8Z4|A0A834L8Z4_RHOSS;tr|A0A6A4LBQ0|A0A6A4LBQ0_9ERIC	tr|A0A834L8C4|A0A834L8C4_RHOSS Leucyl-tRNA synthetase OS=Rhododendron simsii OX=118357 GN=RHSIM_Rhsim12G0137900 PE=3 SV=1;tr|A0A6A4L8S1|A0A6A4L8S1_9ERIC Leucyl-tRNA synthetase (Fragment) OS=Rhododendron williamsianum OX=262921 GN=C3L33_14152 PE=3 SV=1;tr|A	24.353	NaN	NaN	NaN	24.7309	24.7155	146.35	64.115
tr|A0A834GI97|A0A834GI97_RHOSS	tr|A0A834GI97|A0A834GI97_RHOSS GDP-mannose 4,6-dehydratase OS=Rhododendron simsii OX=118357 GN=RHSIM_Rhsim08G0034400 PE=3 SV=1	25.3721	26.0154	26.5133	26.1811	NaN	24.6751	41.741	62.199
tr|A0A834LQ21|A0A834LQ21_RHOSS;tr|A0A6A4KY08|A0A6A4KY08_9ERIC	tr|A0A834LQ21|A0A834LQ21_RHOSS Pyruvate decarboxylase OS=Rhododendron simsii OX=118357 GN=RHSIM_Rhsim05G0219500 PE=3 SV=1	25.4874	25.0595	NaN	25.8404	26.0117	25.9041	68.165	62.153
tr|A0A834LHJ1|A0A834LHJ1_RHOSS;tr|A0A834LKV8|A0A834LKV8_RHOSS;tr|A0A834H0M4|A0A834H0M4_RHOSS;tr|A0A834GY02|A0A834GY02_RHOSS;tr|A0A6A4KXH7|A0A6A4KXH7_9ERIC;tr|A0A6A4LYQ5|A0A6A4LYQ5_9ERIC	tr|A0A834LHJ1|A0A834LHJ1_RHOSS Aldo_ket_red domain-containing protein OS=Rhododendron simsii OX=118357 GN=RHSIM_Rhsim08G0011000 PE=4 SV=1;tr|A0A834LKV8|A0A834LKV8_RHOSS Aldo_ket_red domain-containing protein OS=Rhododendron simsii OX=118357 GN=RHSIM_Rhsim0	25.371	24.8577	NaN	NaN	25.2115	25.4432	38.383	61.606
tr|A0A6A4MCL8|A0A6A4MCL8_9ERIC;tr|A0A834H767|A0A834H767_RHOSS	tr|A0A6A4MCL8|A0A6A4MCL8_9ERIC Tripeptidyl-peptidase II (Fragment) OS=Rhododendron williamsianum OX=262921 GN=C3L33_03223 PE=3 SV=1;tr|A0A834H767|A0A834H767_RHOSS Tripeptidyl-peptidase II OS=Rhododendron simsii OX=118357 GN=RHSIM_Rhsim03G0187200 PE=3 SV=1	25.4161	NaN	25.0396	25.0298	23.7774	24.9565	166.38	61.33
tr|A0A834H072|A0A834H072_RHOSS;tr|A0A834G7C1|A0A834G7C1_RHOSS;tr|A0A834G0R2|A0A834G0R2_RHOSS;tr|A0A6A4LKU9|A0A6A4LKU9_9ERIC	tr|A0A834H072|A0A834H072_RHOSS (S)-2-hydroxy-acid oxidase OS=Rhododendron simsii OX=118357 GN=RHSIM_Rhsim04G0033100 PE=3 SV=1;tr|A0A834G7C1|A0A834G7C1_RHOSS (S)-2-hydroxy-acid oxidase OS=Rhododendron simsii OX=118357 GN=RHSIM_Rhsim13G0114900 PE=3 SV=1;tr|A	26.0857	26.453	NaN	NaN	26.1772	25.7599	40.367	61.07
tr|A0A6A4KZY5|A0A6A4KZY5_9ERIC;tr|A0A834LKA4|A0A834LKA4_RHOSS;tr|A0A6A4LIK3|A0A6A4LIK3_9ERIC;tr|A0A834LLH7|A0A834LLH7_RHOSS	tr|A0A6A4KZY5|A0A6A4KZY5_9ERIC D-3-phosphoglycerate dehydrogenase (Fragment) OS=Rhododendron williamsianum OX=262921 GN=C3L33_19635 PE=3 SV=1;tr|A0A834LKA4|A0A834LKA4_RHOSS D-3-phosphoglycerate dehydrogenase OS=Rhododendron simsii OX=118357 GN=RHSIM_Rhsim0	24.3789	24.6918	23.342	NaN	NaN	NaN	62.297	61.06
tr|A0A6A4LYW7|A0A6A4LYW7_9ERIC	tr|A0A6A4LYW7|A0A6A4LYW7_9ERIC Ubiquitinyl hydrolase 1 (Fragment) OS=Rhododendron williamsianum OX=262921 GN=C3L33_04771 PE=3 SV=1	25.0433	NaN	NaN	NaN	24.8707	NaN	125.98	59.517
tr|A0A834HBW5|A0A834HBW5_RHOSS;tr|A0A834H3P5|A0A834H3P5_RHOSS;tr|A0A6A4L6P0|A0A6A4L6P0_9ERIC;tr|A0A6A4LBV2|A0A6A4LBV2_9ERIC	tr|A0A834HBW5|A0A834HBW5_RHOSS Dihydrolipoyl dehydrogenase OS=Rhododendron simsii OX=118357 GN=RHSIM_Rhsim02G0001500 PE=3 SV=1;tr|A0A834H3P5|A0A834H3P5_RHOSS Dihydrolipoyl dehydrogenase OS=Rhododendron simsii OX=118357 GN=RHSIM_Rhsim04G0244400 PE=3 SV=1;tr	23.6912	24.338	NaN	24.1021	24.7601	24.669	54.425	59.132
tr|A0A834G7U9|A0A834G7U9_RHOSS;tr|A0A6A4LDF1|A0A6A4LDF1_9ERIC	tr|A0A834G7U9|A0A834G7U9_RHOSS Uncharacterized protein OS=Rhododendron simsii OX=118357 GN=RHSIM_Rhsim12G0209200 PE=4 SV=1;tr|A0A6A4LDF1|A0A6A4LDF1_9ERIC Uncharacterized protein (Fragment) OS=Rhododendron williamsianum OX=262921 GN=C3L33_14719 PE=4 SV=1	25.2431	24.9694	NaN	22.8578	22.4256	22.1099	44.453	58.859
tr|A0A834GH00|A0A834GH00_RHOSS;tr|A0A834GMV5|A0A834GMV5_RHOSS;tr|A0A6A4M6H5|A0A6A4M6H5_9ERIC	tr|A0A834GH00|A0A834GH00_RHOSS Uncharacterized protein OS=Rhododendron simsii OX=118357 GN=RHSIM_Rhsim08G0006400 PE=4 SV=1;tr|A0A834GMV5|A0A834GMV5_RHOSS Uncharacterized protein OS=Rhododendron simsii OX=118357 GN=RHSIM_Rhsim08G0007100 PE=4 SV=1;tr|A0A6A4M	25.3823	25.4916	24.8371	24.8969	24.4191	23.8312	45.907	56.695
tr|A0A834HF26|A0A834HF26_RHOSS;tr|A0A6A4M543|A0A6A4M543_9ERIC	tr|A0A834HF26|A0A834HF26_RHOSS Epimerase domain-containing protein OS=Rhododendron simsii OX=118357 GN=RHSIM_Rhsim01G0209500 PE=4 SV=1;tr|A0A6A4M543|A0A6A4M543_9ERIC Epimerase domain-containing protein (Fragment) OS=Rhododendron williamsianum OX=262921 GN=	NaN	NaN	NaN	25.3978	25.8321	25.4732	43.695	54.747
tr|A0A6A4LRB5|A0A6A4LRB5_9ERIC;tr|A0A834L6A4|A0A834L6A4_RHOSS;tr|A0A834HE51|A0A834HE51_RHOSS;tr|A0A6A4LB28|A0A6A4LB28_9ERIC	tr|A0A6A4LRB5|A0A6A4LRB5_9ERIC Elongation factor Tu (Fragment) OS=Rhododendron williamsianum OX=262921 GN=C3L33_07521 PE=3 SV=1;tr|A0A834L6A4|A0A834L6A4_RHOSS Elongation factor Tu OS=Rhododendron simsii OX=118357 GN=RHSIM_Rhsim13G0022100 PE=3 SV=1;tr|A0A83	NaN	25.714	25.6365	25.6564	NaN	NaN	48.173	54.599
tr|A0A6A4MDB3|A0A6A4MDB3_9ERIC;tr|A0A834LSC8|A0A834LSC8_RHOSS	tr|A0A6A4MDB3|A0A6A4MDB3_9ERIC Uncharacterized protein (Fragment) OS=Rhododendron williamsianum OX=262921 GN=C3L33_02048 PE=3 SV=1;tr|A0A834LSC8|A0A834LSC8_RHOSS Uncharacterized protein OS=Rhododendron simsii OX=118357 GN=RHSIM_Rhsim03G0018900 PE=3 SV=1	NaN	NaN	NaN	NaN	26.0111	25.1911	31.91	54.382
tr|A0A6A4MQU4|A0A6A4MQU4_9ERIC;tr|A0A834LDU1|A0A834LDU1_RHOSS	tr|A0A6A4MQU4|A0A6A4MQU4_9ERIC 1-deoxy-D-xylulose-5-phosphate reductoisomerase (Fragment) OS=Rhododendron williamsianum OX=262921 GN=C3L33_00701 PE=3 SV=1;tr|A0A834LDU1|A0A834LDU1_RHOSS 1-deoxy-D-xylulose-5-phosphate reductoisomerase OS=Rhododendron simsii	NaN	23.5826	NaN	23.7223	22.9887	23.3038	42.845	53.839
tr|A0A834H566|A0A834H566_RHOSS	tr|A0A834H566|A0A834H566_RHOSS ABC1 domain-containing protein OS=Rhododendron simsii OX=118357 GN=RHSIM_Rhsim06G0177200 PE=4 SV=1	24.1986	24.9141	24.1815	24.0367	NaN	23.6178	88.608	52.15
tr|A0A834GPC0|A0A834GPC0_RHOSS;tr|A0A6A4LGZ9|A0A6A4LGZ9_9ERIC;tr|A0A6A4LVQ4|A0A6A4LVQ4_9ERIC	tr|A0A834GPC0|A0A834GPC0_RHOSS SERPIN domain-containing protein OS=Rhododendron simsii OX=118357 GN=RHSIM_Rhsim07G0233000 PE=3 SV=1;tr|A0A6A4LGZ9|A0A6A4LGZ9_9ERIC SERPIN domain-containing protein (Fragment) OS=Rhododendron williamsianum OX=262921 GN=C3L33_	25.1328	24.9449	25.071	24.3805	24.8108	24.3649	41.666	50.687
tr|A0A834G5B1|A0A834G5B1_RHOSS;tr|A0A6A4KTY4|A0A6A4KTY4_9ERIC	tr|A0A834G5B1|A0A834G5B1_RHOSS Uncharacterized protein OS=Rhododendron simsii OX=118357 GN=RHSIM_Rhsim11G0034700 PE=3 SV=1;tr|A0A6A4KTY4|A0A6A4KTY4_9ERIC Uncharacterized protein (Fragment) OS=Rhododendron williamsianum OX=262921 GN=C3L33_21838 PE=3 SV=1	25.8882	NaN	25.7148	NaN	25.3629	NaN	131.31	48.384
tr|A0A6A4M5X0|A0A6A4M5X0_9ERIC;tr|A0A834HHP5|A0A834HHP5_RHOSS	tr|A0A6A4M5X0|A0A6A4M5X0_9ERIC E1 ubiquitin-activating enzyme (Fragment) OS=Rhododendron williamsianum OX=262921 GN=C3L33_04471 PE=3 SV=1;tr|A0A834HHP5|A0A834HHP5_RHOSS E1 ubiquitin-activating enzyme OS=Rhododendron simsii OX=118357 GN=RHSIM_Rhsim01G023990	25.2097	NaN	24.3692	NaN	NaN	NaN	126.51	47.628
tr|A0A834H350|A0A834H350_RHOSS	tr|A0A834H350|A0A834H350_RHOSS Aminotran_1_2 domain-containing protein OS=Rhododendron simsii OX=118357 GN=RHSIM_Rhsim04G0022700 PE=3 SV=1	NaN	NaN	NaN	22.4654	23.0157	22.8185	46.548	47.112
tr|A0A834L8T3|A0A834L8T3_RHOSS;tr|A0A834G2Z5|A0A834G2Z5_RHOSS	tr|A0A834L8T3|A0A834L8T3_RHOSS PKS_ER domain-containing protein OS=Rhododendron simsii OX=118357 GN=RHSIM_Rhsim12G0008600 PE=3 SV=1;tr|A0A834G2Z5|A0A834G2Z5_RHOSS Uncharacterized protein OS=Rhododendron simsii OX=118357 GN=RHSIM_Rhsim12G0008800 PE=4 SV=1	NaN	23.5405	NaN	NaN	24.4829	24.4507	71.031	46.515
tr|A0A6A4LEJ2|A0A6A4LEJ2_9ERIC;tr|A0A834G5N0|A0A834G5N0_RHOSS;tr|A0A6A4L4R6|A0A6A4L4R6_9ERIC;tr|A0A834G0F1|A0A834G0F1_RHOSS	tr|A0A6A4LEJ2|A0A6A4LEJ2_9ERIC ARMT1-like_dom domain-containing protein (Fragment) OS=Rhododendron williamsianum OX=262921 GN=C3L33_14354 PE=3 SV=1;tr|A0A834G5N0|A0A834G5N0_RHOSS Pantothenate kinase 2 OS=Rhododendron simsii OX=118357 GN=RHSIM_Rhsim12G01647	24.0661	NaN	24.2689	NaN	NaN	NaN	94.312	45.934
tr|A0A6A4L5S1|A0A6A4L5S1_9ERIC;tr|A0A834HA09|A0A834HA09_RHOSS	tr|A0A6A4L5S1|A0A6A4L5S1_9ERIC RPN2_C domain-containing protein (Fragment) OS=Rhododendron williamsianum OX=262921 GN=C3L33_15170 PE=3 SV=1;tr|A0A834HA09|A0A834HA09_RHOSS 26S proteasome non-ATPase regulatory subunit 1 homolog OS=Rhododendron simsii OX=1183	25.6732	NaN	NaN	NaN	25.6418	NaN	96.206	45.23
tr|A0A834GFN9|A0A834GFN9_RHOSS;tr|A0A834GBM9|A0A834GBM9_RHOSS;tr|A0A834G9Z0|A0A834G9Z0_RHOSS;tr|A0A834GYP7|A0A834GYP7_RHOSS;tr|A0A834GHS5|A0A834GHS5_RHOSS;tr|A0A6A4KR36|A0A6A4KR36_9ERIC;tr|A0A6A4L1F1|A0A6A4L1F1_9ERIC	tr|A0A834GFN9|A0A834GFN9_RHOSS PKS_ER domain-containing protein OS=Rhododendron simsii OX=118357 GN=RHSIM_Rhsim10G0174500 PE=3 SV=1;tr|A0A834GBM9|A0A834GBM9_RHOSS PKS_ER domain-containing protein OS=Rhododendron simsii OX=118357 GN=RHSIM_Rhsim10G0174300 PE	26.5973	27.4257	27.2445	28.7082	29.341	29.0398	39.041	44.971
tr|A0A834LDB5|A0A834LDB5_RHOSS;tr|A0A6A4LHE6|A0A6A4LHE6_9ERIC	tr|A0A834LDB5|A0A834LDB5_RHOSS Gal_mutarotas_2 domain-containing protein OS=Rhododendron simsii OX=118357 GN=RHSIM_Rhsim10G0127500 PE=3 SV=1;tr|A0A6A4LHE6|A0A6A4LHE6_9ERIC Gal_mutarotas_2 domain-containing protein (Fragment) OS=Rhododendron williamsianum O	24.4456	NaN	23.67	NaN	NaN	NaN	106.26	44.751
tr|A0A6A4LED2|A0A6A4LED2_9ERIC;tr|A0A6A4LDT9|A0A6A4LDT9_9ERIC;tr|A0A6B9S3J1|A0A6B9S3J1_9ERIC;tr|A0A6B9S1Q9|A0A6B9S1Q9_9ERIC;tr|A0A2Z5TVQ4|A0A2Z5TVQ4_KALPR;tr|A0A2Z5TVH2|A0A2Z5TVH2_KALPR;tr|C8ZLJ5|C8ZLJ5_RHOSS	tr|A0A6A4LED2|A0A6A4LED2_9ERIC Gp_dh_N domain-containing protein (Fragment) OS=Rhododendron williamsianum OX=262921 GN=C3L33_14436 PE=3 SV=1;tr|A0A6A4LDT9|A0A6A4LDT9_9ERIC Gp_dh_N domain-containing protein (Fragment) OS=Rhododendron williamsianum OX=262921	27.957	27.9821	28.0936	26.5995	27.8121	28.2445	33.081	44.64
tr|A0A834H8W0|A0A834H8W0_RHOSS;tr|A0A834H951|A0A834H951_RHOSS;tr|A0A834FTP7|A0A834FTP7_RHOSS;tr|A0A834L3S1|A0A834L3S1_RHOSS	tr|A0A834H8W0|A0A834H8W0_RHOSS Uncharacterized protein OS=Rhododendron simsii OX=118357 GN=RHSIM_Rhsim03G0042000 PE=3 SV=1;tr|A0A834H951|A0A834H951_RHOSS Uncharacterized protein OS=Rhododendron simsii OX=118357 GN=RHSIM_Rhsim03G0041800 PE=3 SV=1;tr|A0A834F	NaN	21.0475	NaN	20.8238	NaN	NaN	32.844	44.326
tr|A0A834HFM0|A0A834HFM0_RHOSS	tr|A0A834HFM0|A0A834HFM0_RHOSS Uncharacterized protein OS=Rhododendron simsii OX=118357 GN=RHSIM_Rhsim01G0263100 PE=3 SV=1	23.4526	24.2961	NaN	NaN	NaN	24.0897	52.22	44.08
tr|A0A834HJL6|A0A834HJL6_RHOSS;tr|A0A6A4LVT2|A0A6A4LVT2_9ERIC	tr|A0A834HJL6|A0A834HJL6_RHOSS Serine/threonine-protein phosphatase OS=Rhododendron simsii OX=118357 GN=RHSIM_Rhsim01G0200700 PE=3 SV=1;tr|A0A6A4LVT2|A0A6A4LVT2_9ERIC Serine/threonine-protein phosphatase (Fragment) OS=Rhododendron williamsianum OX=262921 G	24.2421	NaN	NaN	24.5151	24.2807	24.7094	110.75	43.996
tr|A0A834G7G5|A0A834G7G5_RHOSS	tr|A0A834G7G5|A0A834G7G5_RHOSS Carboxypeptidase OS=Rhododendron simsii OX=118357 GN=RHSIM_Rhsim11G0168200 PE=3 SV=1	24.5003	NaN	NaN	24.8525	24.3524	NaN	52.639	43.476
[truncated: 91 more rows]
